# Supplementary material for: Linking FOXO3, NCOA3, and TCF7L2 to Ras pathway phenotypes through a genome-wide forward genetic screen in human colorectal cancer cells
Source: PubMed Central journal article supplement (PMC5755028; doi:10.1186/s13073-017-0511-4), 2018-01-04
Supplement: 13073_2017_511_MOESM1_ESM.pdf [file 13073_2017_511_MOESM1_ESM.pdf]

1 **Linking *FOXO3*, *NCOA3*, and *TCF7L2* to Ras pathway phenotypes through a genome-**  
2 **wide forward genetic screen in human colorectal cancer cells**

3  
4 **Authors:** Snehangshu Kundu<sup>1</sup>, Muhammad Akhtar Ali<sup>1</sup>, Niklas Handin<sup>2</sup>, Narendra Padhan<sup>1</sup>,  
5 Jimmy Larsson<sup>1</sup>, Maria Karoutsou<sup>1</sup>, Kenneth Ban<sup>3, 4</sup>, Jacek R. Wiśniewski<sup>5</sup>, Per Artursson<sup>2</sup>,  
6 Liqun He<sup>1</sup>, Mats Hellström<sup>1</sup>, and Tobias Sjöblom<sup>1\*</sup>

7 **Expanded view Materials:**

8 Supplementary Figures with legends S1-15

9 Tables S1-10

11 **Supplementary Figures and legends:**

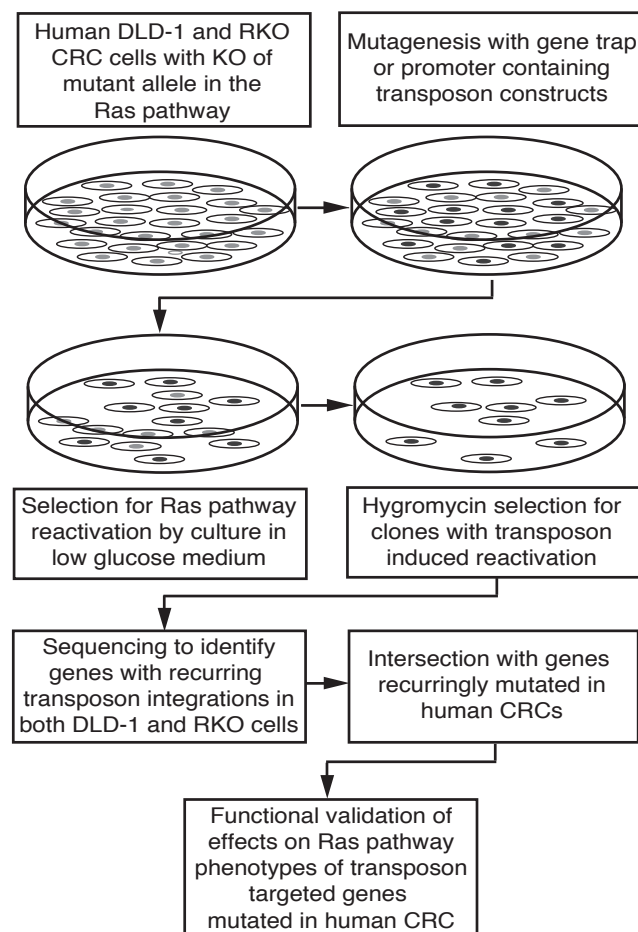

13 **Figure S1. Forward genetic screen to identify genes conferring a Ras pathway**  
 14 **phenotype on human colorectal cancer cells.** Human DLD-1 and RKO CRC cells deprived  
 15 of a mutant oncogene in the Ras pathway were transiently transfected with *piggyBac*  
 16 transposase and gene trap or promoter containing transposons. Cell clones resistant to glucose  
 17 deprivation were then obtained by selection in medium containing 0.5 mM glucose for ~3  
 18 weeks. To eliminate clones generated by endogenous mutagenesis due to MMR deficiency or  
 19 other non-transposon mediated processes, hygromycin was applied to select for glucose  
 20 resistant clones with productive transposon integrations. Genes with transposon integration  
 21 events were identified by splinkerette PCR and sequencing. By intersecting genes with  
 22 recurring transposon integrations with genes observed mutated in genomic analyses of human  
 23 CRCs, a cancer relevant set of genes with ability to confer the Ras pathway low glucose  
 24 growth phenotype can be derived and validated by assessment of other Ras pathway  
 25 phenotypes.

26

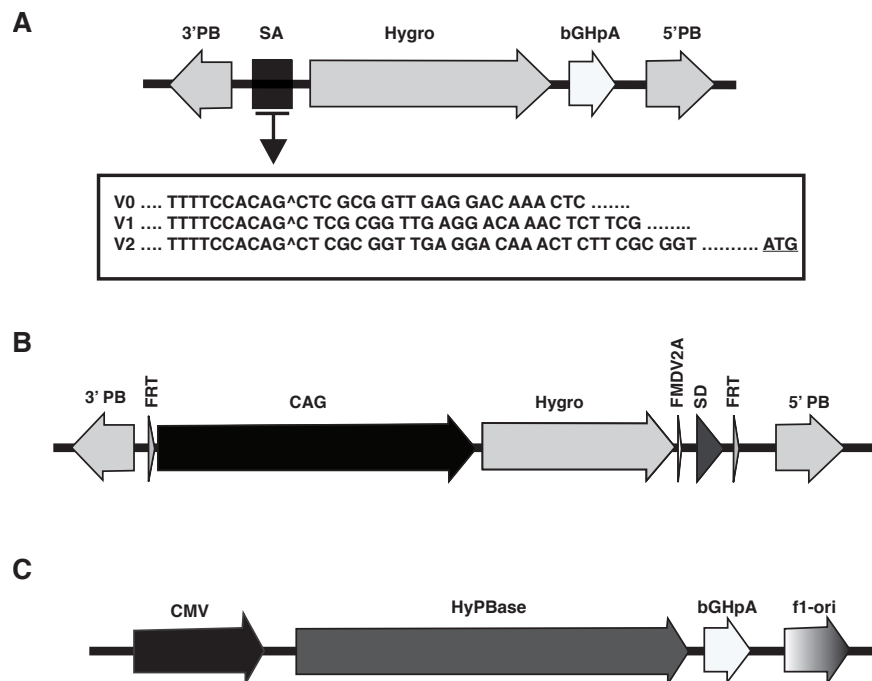

27

28 **Figure S2. *piggyBac* transposon constructs.** Gene trap constructs (PB-GT) in three reading  
29 frames (V0, V1 and V2, inset) (A), activation construct (PB-CAG-SD) (B) and HyPBase  
30 transposase construct (C). 3' and 5' PB, 3' and 5' inverted terminal repeats of *piggyBac* (PB)  
31 transposon; SA, adenoviral splice acceptor; Hygro, hygromycin phosphotransferase; bGHpA,  
32 bovine growth hormone polyadenylation sequence; FRT, Flippase Recombination Target;  
33 CAG, CMV enhancer and chicken beta-actin promoter; FMDV2A, Foot-and-Mouth Disease  
34 Virus 2A; SD, splice donor sequence; CMV, cytomegalovirus promoter; HyPBase,  
35 Hyperactive mouse codon optimized *piggyBac* transposase; fl-ori, fi-origin of replication  
36 sequence.

37

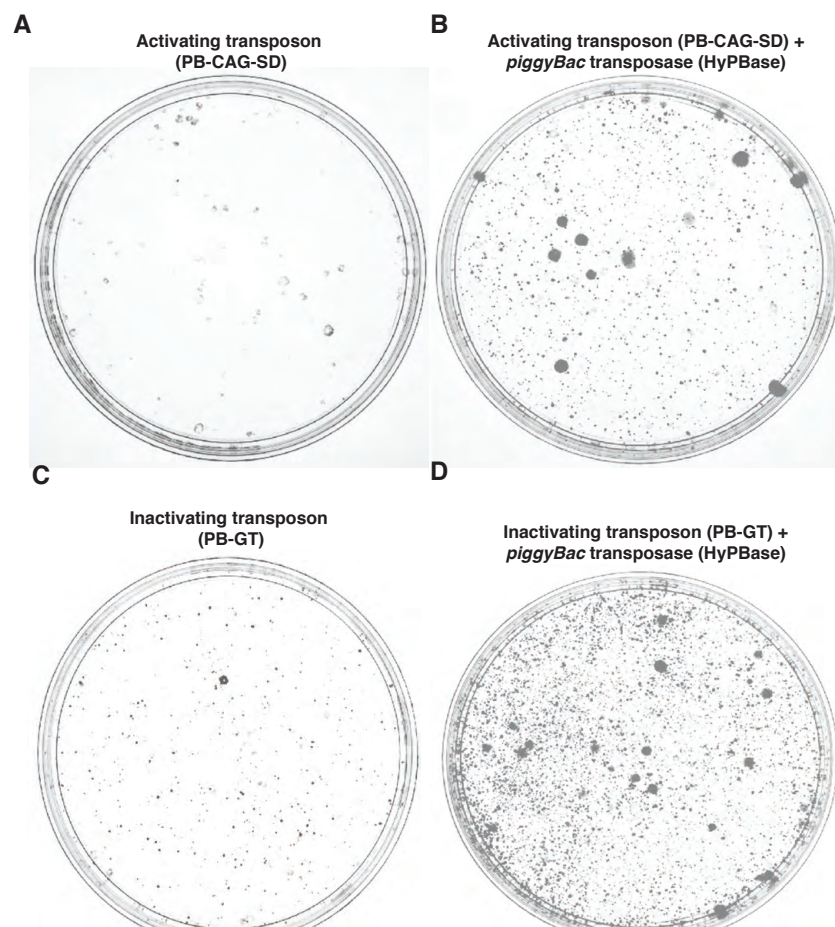

38

39 **Figure S3. Clonogenic assay for transposon mediated reversion to growth in low glucose**  
 40 **medium.** Transposon integrations reversing the lost ability to grow under glucose-restricted  
 41 conditions conferred by Ras pathway activation were generated in a two-step selection  
 42 procedure.  $2.5 \times 10^5$  DLD-1  $KRAS^{wt/-}$  cells were transfected with a *piggyBac* transposon (either  
 43 inactivating or activating) along with *piggyBac* transposase (*HyPBBase*). Cells were selected  
 44 in DMEM with 0.4 mM L-glucose for 23 days followed by selection in 0.25 mg/ml  
 45 hygromycin for 10-12 days and staining in Trypan blue. Activation transposon alone (A),  
 46 activation transposon + HyPBBase (B), gene trap transposon only (C), and gene trap  
 47 transposon + HyPBBase (D).

48

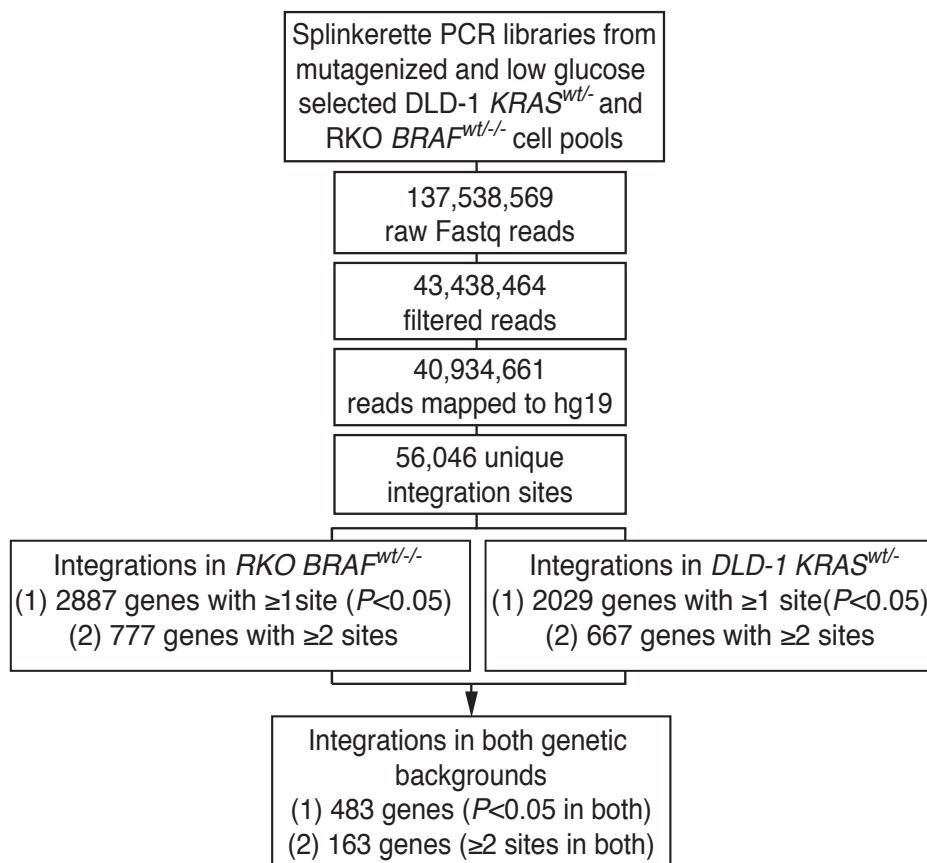

49

50 **Figure S4. Flow charts for bioinformatic analysis.** Flow chart of bioinformatic analysis to  
 51 identify genes with transposon integrations in the clone pools. Two complementary

52 approaches to identify genes of interest were used, (1) Poisson statistics or (2) selection of  
53 genes with multiple integrations in both genetic backgrounds (see Methods).

54

55

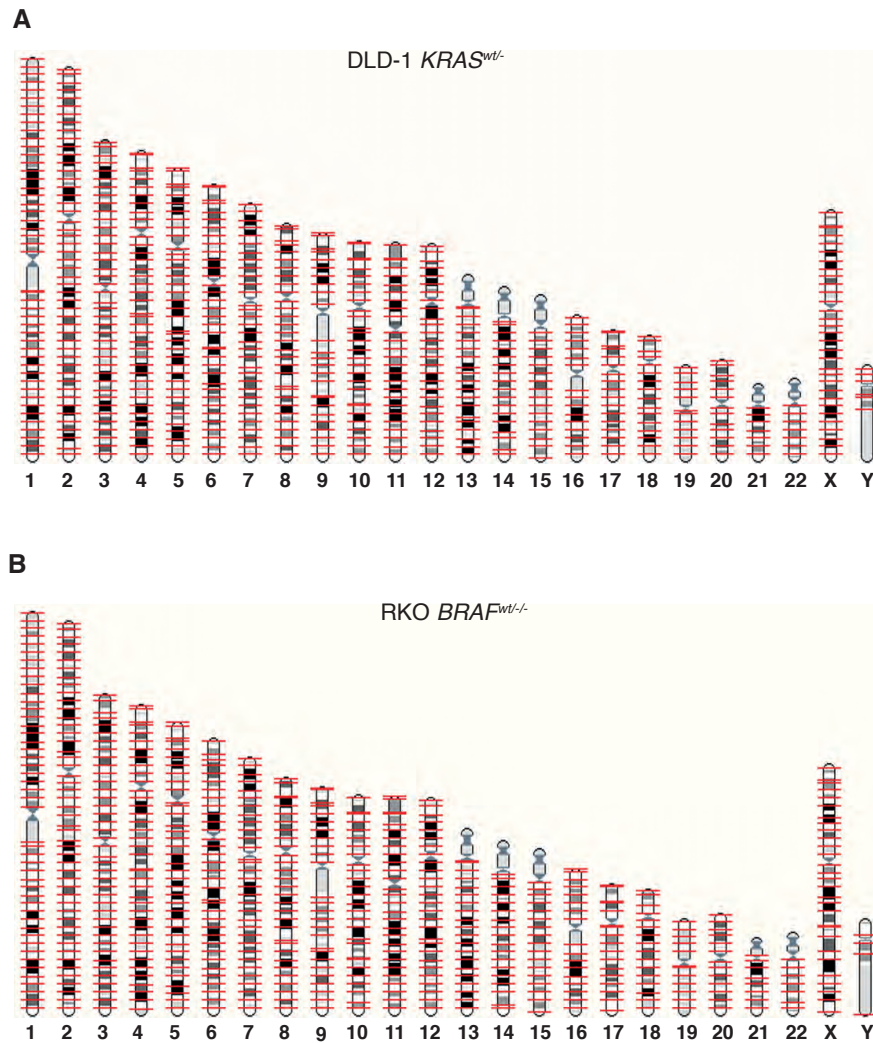

56

57 **Figure S5. Transposon integration patterns in  $DLD-1 KRAS^{wt/-}$  and  $RKO BRAF^{wt/-}$**   
58 **libraries.** Ideograms showing chromosomal integrations of transposons in  $DLD-1 KRAS^{wt/-}$   
59 (A) and  $RKO BRAF^{wt/-}$  pools (B).

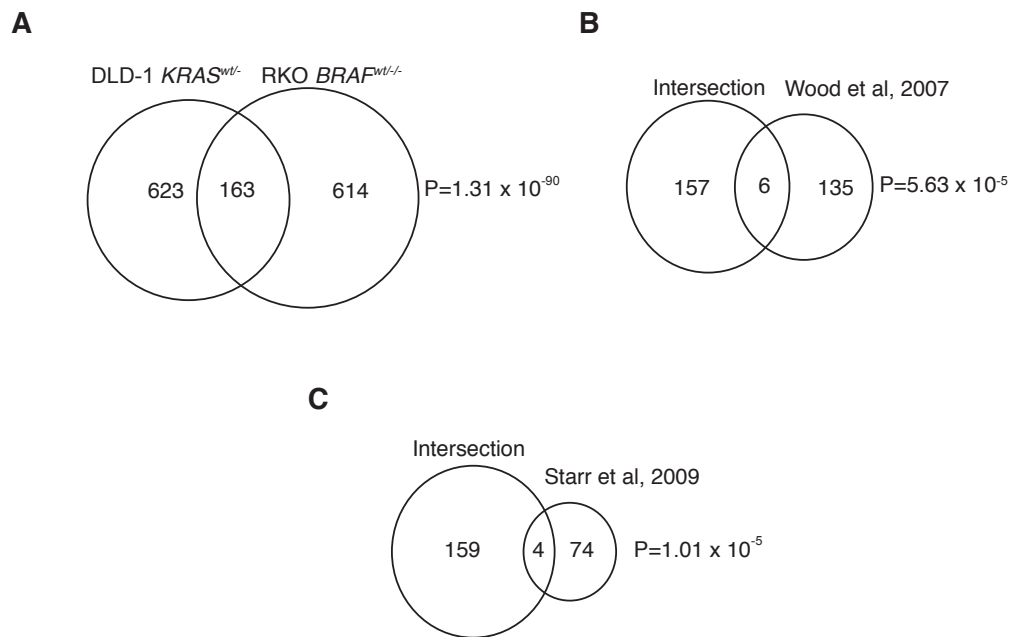

60

61 **Figure S6. Genes with recurring transposon integration sites in both DLD-1 *KRAS*<sup>wt/-</sup>**  
 62 **and RKO *BRAF*<sup>wt/-</sup> transposon mutagenized libraries selected in low glucose previously**  
 63 **linked to CRC.** The intersections between genes with recurring transposon insertions in both  
 64 cell systems **(A)** , with human candidate CRC genes from Wood *et al.* (1) **(B)** or, mouse  
 65 candidate CRC genes from Starr *et al.* (2) **(C)** were visualized by Venn diagrams. The *P*  
 66 values were calculated using the hypergeometric distribution.

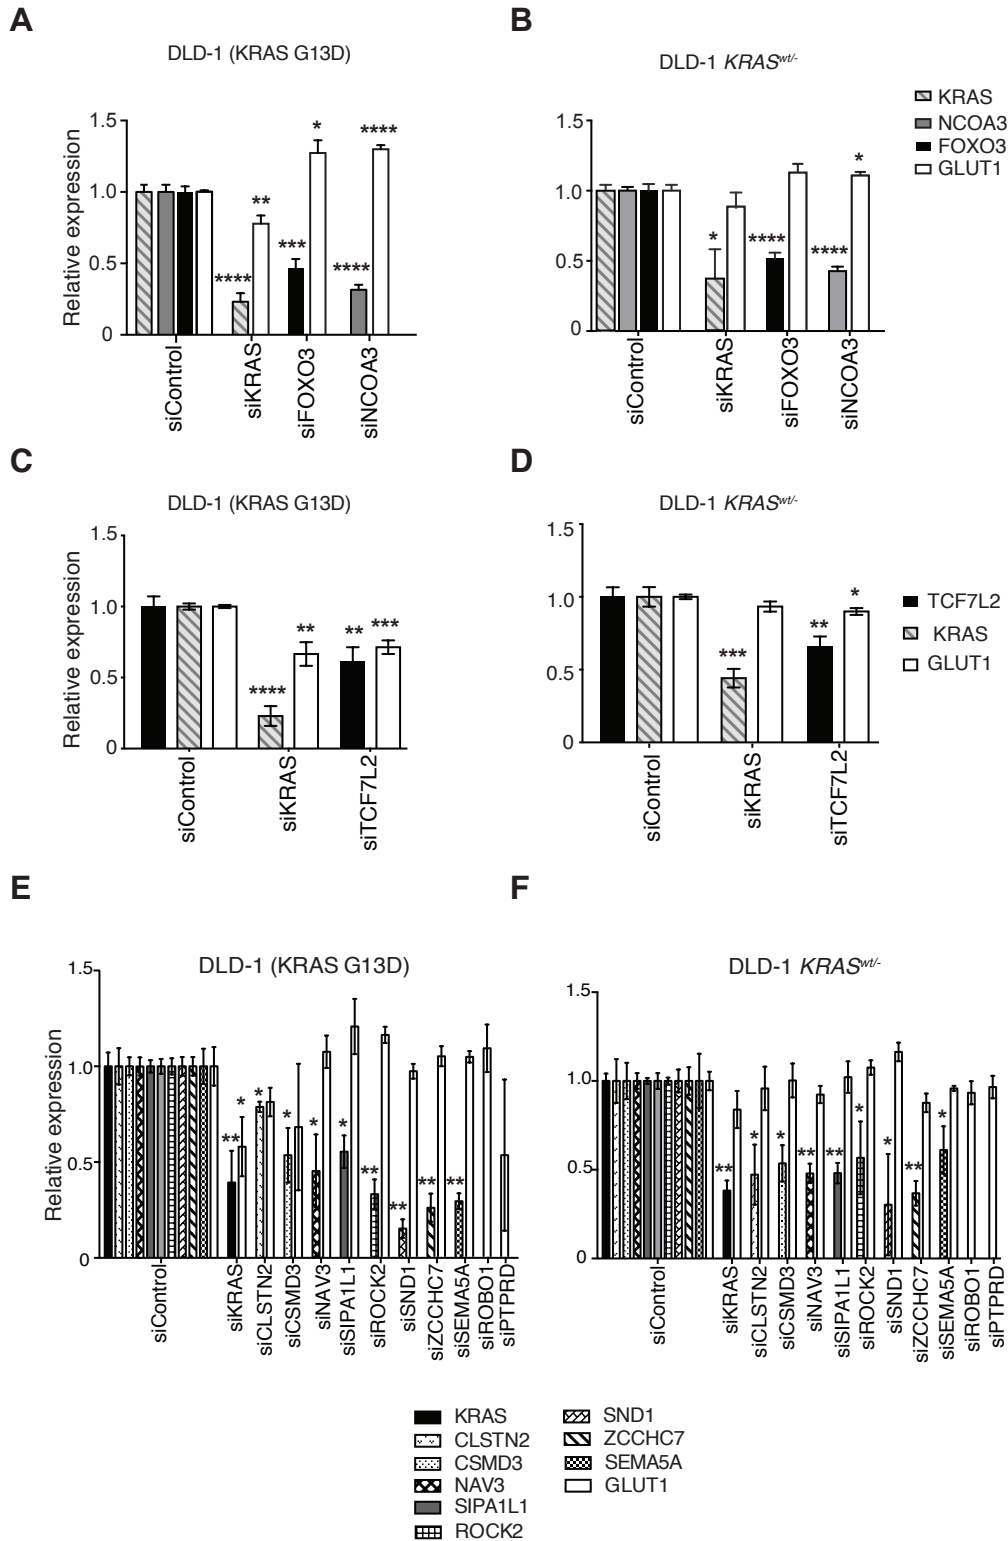

67

68 **Figure S7. Identification of regulators of GLUT1 expression by transient siRNA**

69 **knockdown.** Whereas transient siRNA mediated knockdown of *FOXO3* and *NCOA3* showed

70 significantly increased *GLUT1* expression in parental DLD-1 *KRAS* G13D (A) and DLD-1

71 *KRAS<sup>wt/-</sup>* (B), knockdown of *TCF7L2* showed significantly reduced *GLUT1* expression in  
 72 parental DLD-1 *KRAS G13D* (C) and DLD-1 *KRAS<sup>wt/-</sup>*(D) as compared to siControl.  
 73 Knockdown of *CLSTN2*, *CSMD3*, *NAV3*, *PTPRD*, *ROBO1*, *ROCK2*, *SIPA1L1*, *SND1* and  
 74 *ZCCHC7* did not significantly affect *GLUT1* transcript levels (E, F). No transcripts encoding  
 75 *PTPRD* and *ROBO1* were detected in DLD-1 cells. Transcript levels were determined by  
 76 qPCR using beta-actin as endogenous control and normalized to control siRNA-transfected  
 77 cells. Each experiment was performed with three biological replicates and three technical  
 78 replicates. The *P* values were calculated using Student's *T* test where \*\*\*\*:  $p < 0.0001$ , \*\*\*:  
 79  $p < 0.001$ , \*\*:  $p < 0.01$ , \*:  $p < 0.05$ .

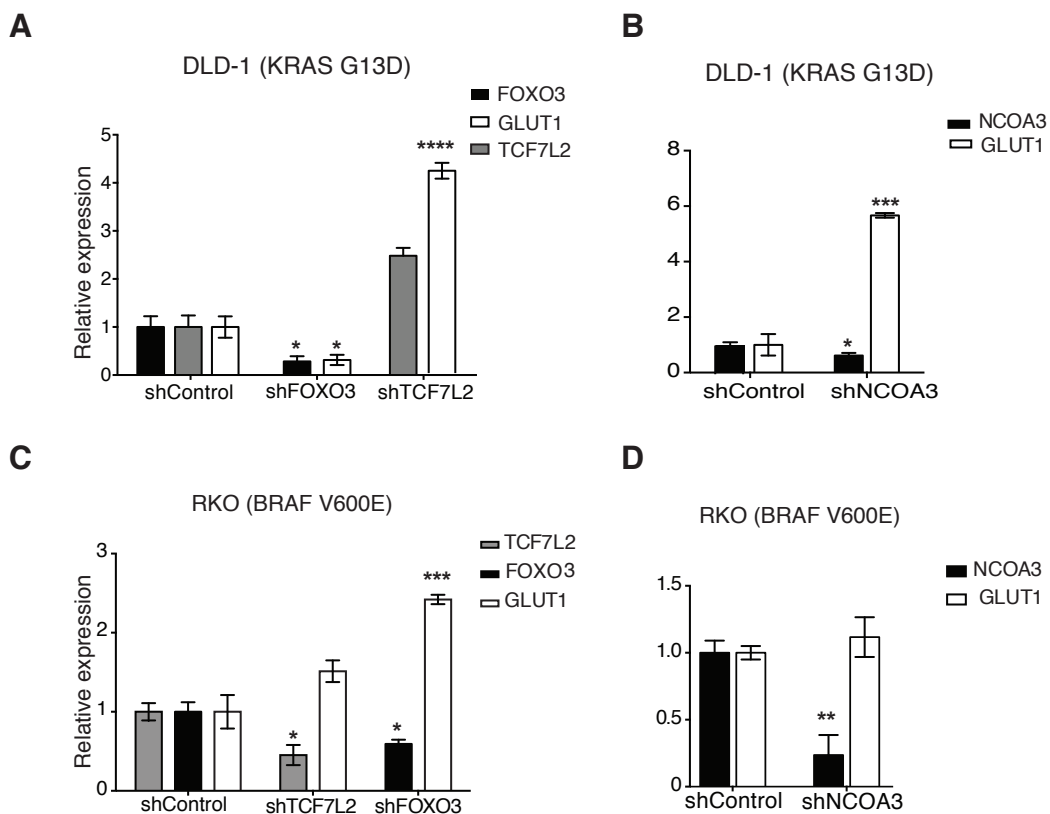

80

81 **Figure S8. The transposon target genes *FOXO3*, *NCOA3*, and *TCF7L2* regulate *GLUT1***  
 82 **expression.** Stable knockdown by shRNA of *FOXO3*, *TCF7L2*, and *NCOA3* in parental  
 83 DLD-1 (KRAS G13D) (A and B), RKO (BRAF V600E) (C and D). Gene expression levels  
 84 were measured by qPCR using beta-actin as endogenous control and normalized to



85 shControl. Each experiment was performed three times with three technical replicates. The  
 86 statistical analysis was performed by Student's *T* test where \*\*\*\*:  $p < 0.0001$ , \*\*\*:  $p <$   
 87  $0.001$ , \*\*:  $p < 0.01$ , \*:  $p < 0.05$ .

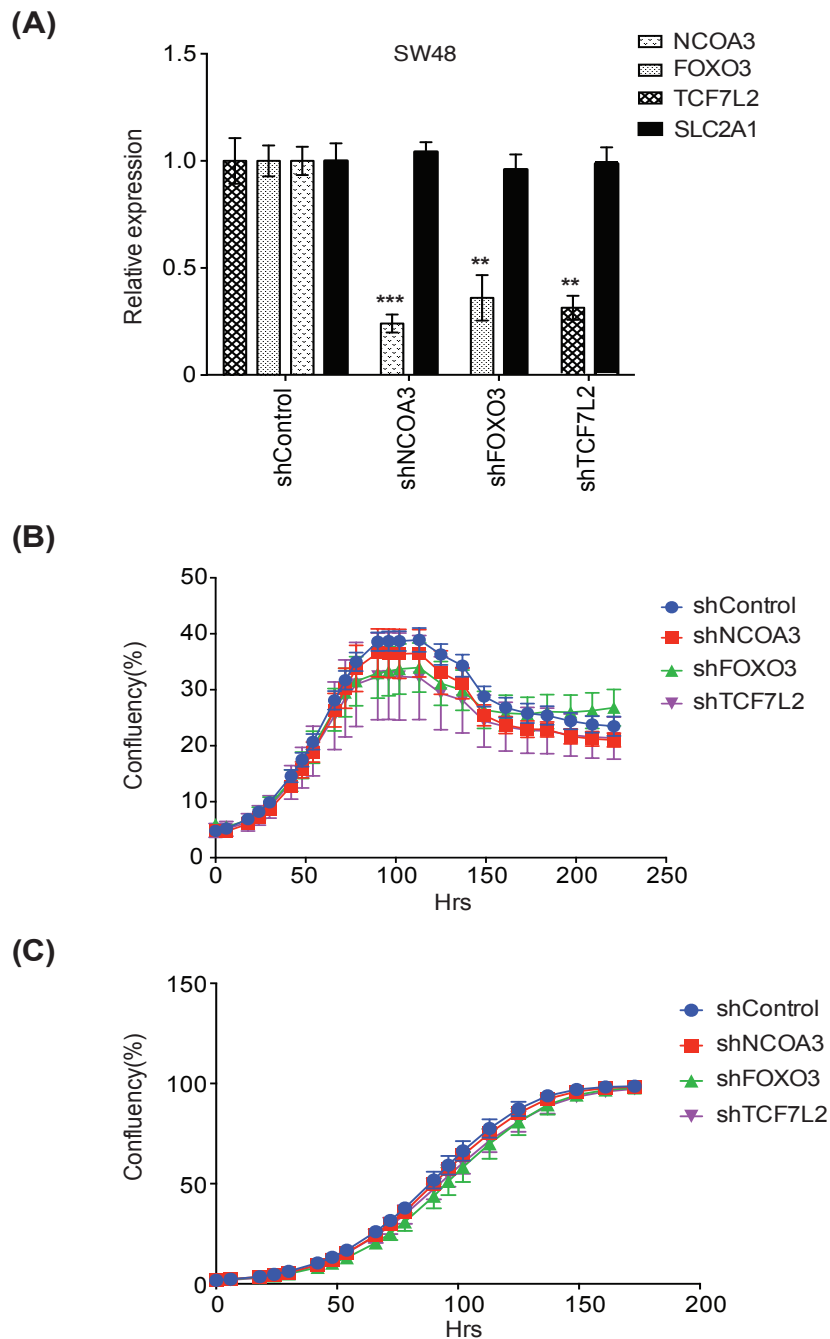

88

89 **Figure S9. Stable knock-down of *NCOA3*, *FOXO3* and *TCF7L2* in SW48 genetic**  
 90 **background had no effect on *SLC2A1* expression and growth advantage in low-glucose**  
 91 **(0.4mM) condition. The *GLUT1* expression levels after stable knock down of these three**

92 genes in SW48 cell line (A). Real time growth curves for stable shRNA knockdown lines of  
93 *NCOA3*, *FOXO3* and *TCF7L2* in SW48 cells in low glucose medium (0.4mM) (B) and  
94 normal medium (C). Each experiment was performed twice with four technical replicates.  
95 The statistical analysis was performed by Student's *T* test where \*\*\*\*:  $p < 0.0001$ , \*\*\*:  $p <$   
96  $0.001$ , \*\*:  $p < 0.01$ , \*:  $p < 0.05$ .

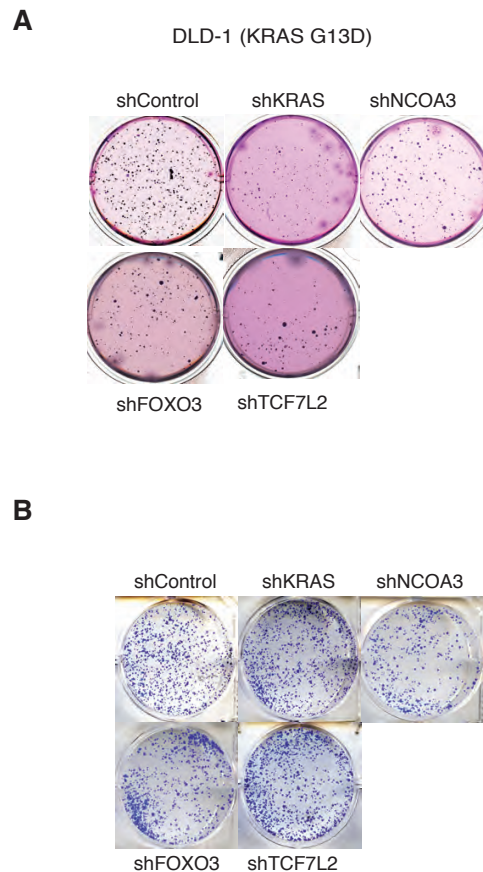

97

98

99 **Figure S10. Soft agar assays, growth rates and colony formation on plastic for stable**  
100 **knockdown lines for *KRAS*, *NCOA3*, *FOXO3* and *TCF7L2* in DLD-1 (KRAS G13D)**  
101 **cells. Soft agar plates stained with Crystal Violet, growth curve of DLD-1 (KRAS G13D)**  
102 **cells in medium with normal glucose concentration and colony formation assays on plastic**  
103 **stained with Methylene Blue for DLD-1 KRAS G13D (A and B).**

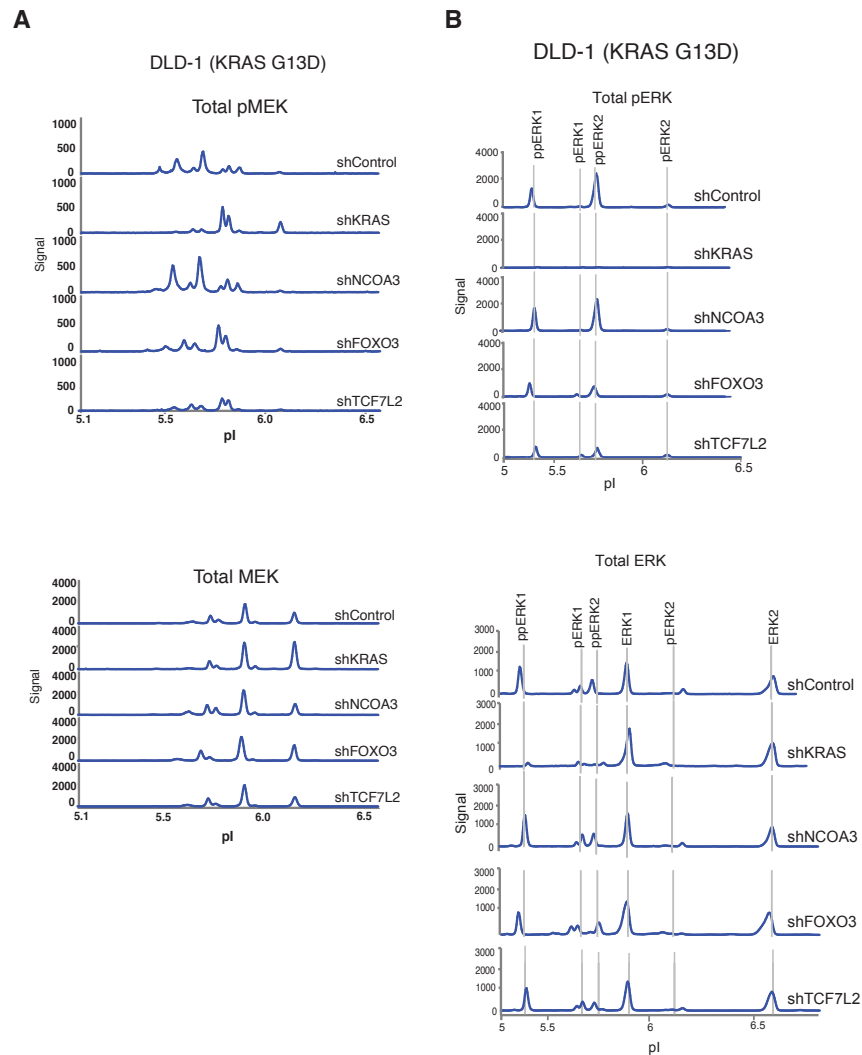

104

105 **Figure S11. Qualitative data from stable knock-down lines of *FOXO3*, *NCOA3* and**  
 106 ***TCF7L2* in DLD-1 (KRAS G13D) for pMEK (A) and pERK (B).** (A) The level of pMEK  
 107 (upper panel) in comparison to MEK (lower panel) was measured by NanoPro analysis in  
 108 stable shRNA lines of *NCOA3*, *FOXO3* and *TCF7L2* in DLD-1 (KRAS G13D). Qualitative  
 109 data were shown as representative electropherograms in the upper and lower panels for total  
 110 pMEK and total MEK protein respectively. (B) The level of pERK (upper panel) and ERK  
 111 (lower panel) was measured by NanoPro analysis in stable shRNA lines of *NCOA3*, *FOXO3*  
 112 and *TCF7L2* in DLD-1 cells. Representative electropherograms showing pERK1/2  
 113 (ppERK1+pERK1+ppERK2+pERK2) and total ERK1/2  
 114 (ppERK1+pERK1+ERK1+ppERK2+pERK2+ERK2). A stable knockdown line for shKRAS

115 was used as a positive control and a shControl line was used as negative control. Each  
116 experiment was performed twice with three technical replicates of each sample.  
117

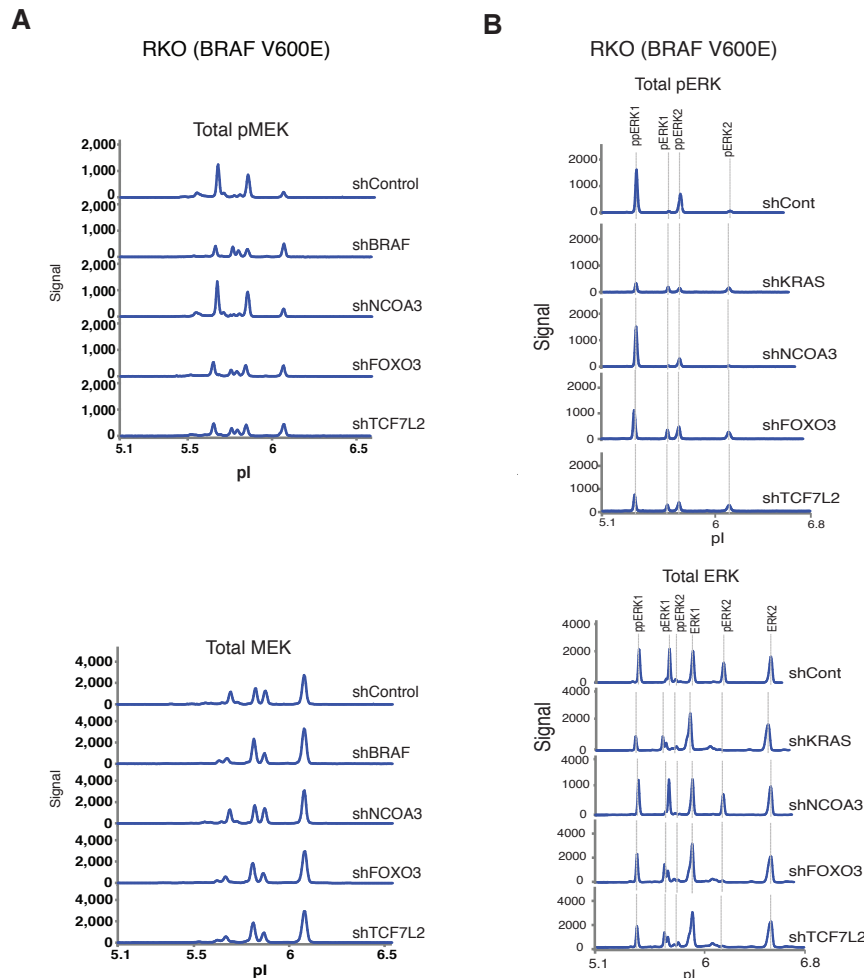

118

119 **Figure S12. Qualitative data from stable knock-down lines of *FOXO3*, *NCOA3* and**  
120 ***TCF7L2* in RKO (BRAF V600E) cells for pMEK (A) and pERK (B).** (A) The level of  
121 pMEK (upper panel) in comparison to MEK (lower panel) was measured by NanoPro  
122 analysis in stable shRNA lines of NCOA3, FOXO3 and TCF7L2 in RKO (BRAF V600E)  
123 cells. Qualitative data were shown as representative electropherograms for total pMEK and  
124 total MEK protein, respectively. (B) The level of pERK (upper panel) in comparison to ERK  
125 (lower panel) was measured by NanoPro analysis in stable shRNA lines of NCOA3, FOXO3  
126 and TCF7L2 in RKO (BRAF V600E). Representative electropherograms showing pERK1/2

127 (ppERK1+pERK1+ppERK2+pERK2) and total ERK1/2  
128 (ppERK1+pERK1+ERK1+ppERK2+pERK2+ERK2). A stable knockdown line for shBRAF  
129 was used as a positive control and a shControl line was used as negative control. Each  
130 experiment was performed twice with three technical replicates of each sample.  
131

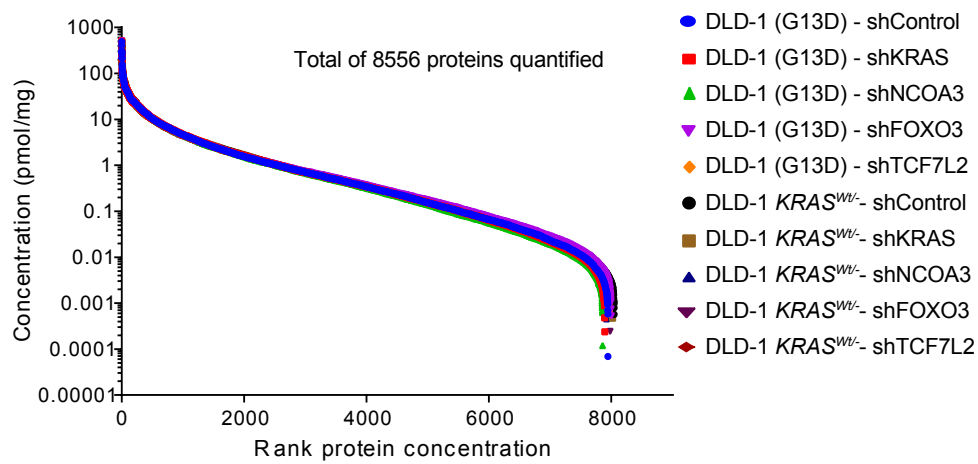

132  
133 **Figure S13.** A ranked protein concentration plot from the highest to the lowest concentration  
134 for the total proteome of stable shRNA knock-down lines of *KRAS*, *NCOA3*, *FOXO3* and  
135 *TCF7L2* in DLD-1 and DLD-1 *KRAS*<sup>wt/-</sup> genetic background showed total of 8556 proteins  
136 identified with concentrations covering 7 orders of magnitude.

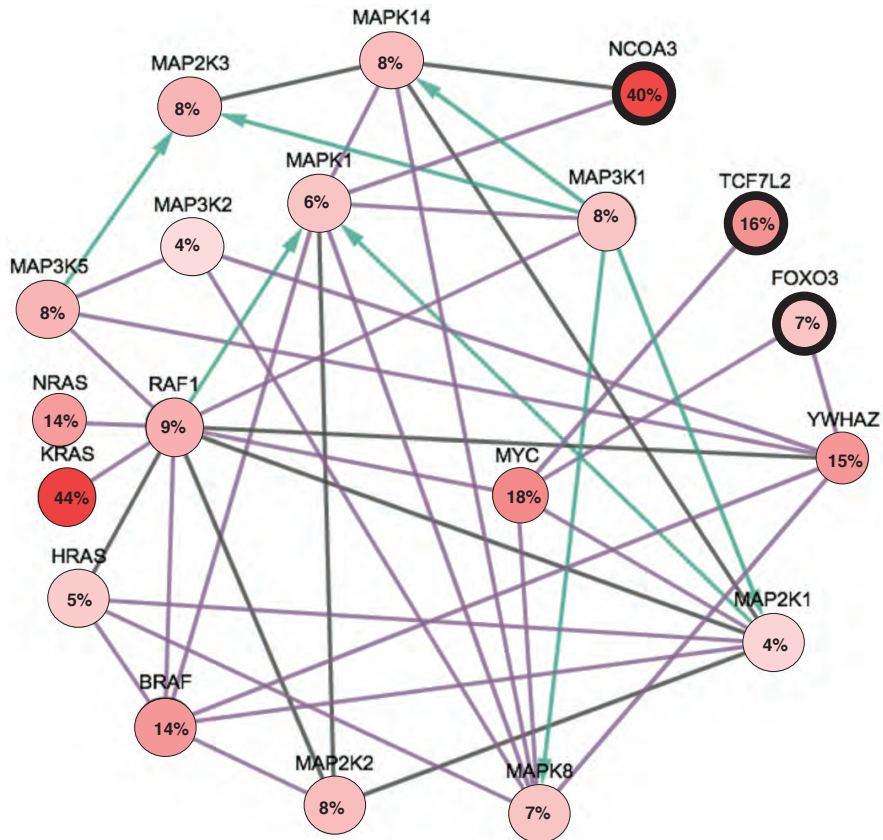

137

138 **Figure S14. Associations of FOXO3, NCOA3 and TCF7L2 with the most frequently**

139 **altered canonical Ras pathway genes in human CRC.** CytoScape molecular network

140 analysis with numbers denoting frequencies of gene alterations observed in human CRC (3)

141 and connecting lines denoting association by protein-complex-formation, state changes such

142 as phosphorylating-dephosphorylating, or physical interactions. The genes *FOXO3*, *NCOA3*

143 and *TCF7L2* were used as seeds and 17 of the 50 most frequently altered neighbor genes

144 from a total of 876 genes altered in  $\geq 3\%$  of patients were included.

145

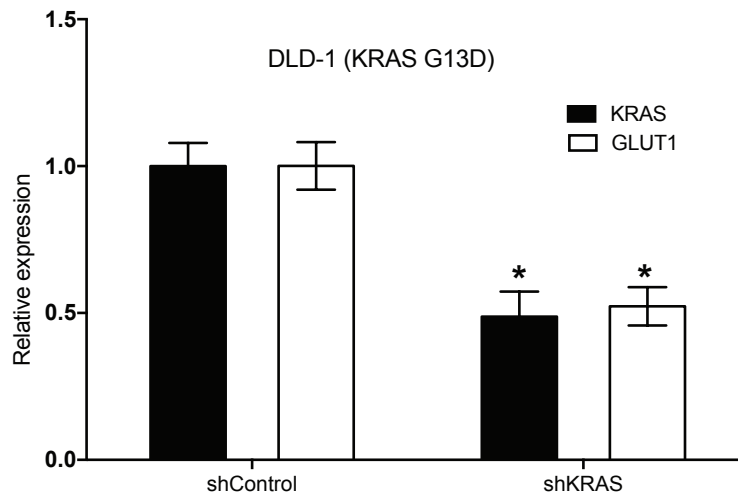

146

147 **Figure S15. Level of *KRAS* and *GLUT1* transcript in *shKRAS* stable knock-downs in**  
 148 **DLD-1 (KRAS G13D) cell line.** The levels of *KRAS* and *GLUT1* transcripts were quantified  
 149 by qPCR using beta-actin as endogenous control. The quantification was repeated twice. The  
 150 *P* value was calculated by Student's *T* test.

151

152 **Supplementary Table legends:**

153 **Table S1. Genes with significant transposon integrations in  $\geq 1$  TTAA site from DLD-1**  
 154 ***KRAS*<sup>wt/-</sup> transposon mutagenized clone pools after selection in low glucose and**  
 155 **hygromycin.** The targeted genes from two independent inactivating or activating transposon  
 156 libraries in DLD-1 *KRAS*<sup>wt/-</sup> cell lines having at least one *piggyBac* transposon integration  
 157 were analyzed. The expected number of integrations in a gene was computed as the total  
 158 number of observed integrations on its chromosome multiplied by the fraction of TTAA sites  
 159 in the gene versus the chromosome. The *P* values were calculated using Poisson statistics,  
 160 with False Discovery Rate (FDR) correction for multiple tests and a corrected *P* value <0.05  
 161 as cutoff for selection of significant genes.

162

163 **Table S2. Genes with significant transposon integrations in  $\geq 1$  TTAA site from RKO**  
 164 ***BRAF*<sup>wt/-</sup> transposon mutagenized clone pools after selection in low glucose and**

165 **hygromycin.** The targeted genes from two independent inactivating or activating transposon  
166 libraries in RKO *BRAF*<sup>wt/-</sup> cell lines having at least one *piggyBac* transposon integration  
167 were analyzed. The expected number of integrations in a gene was computed as the total  
168 number of observed integrations on its chromosome multiplied by the fraction of TTAA sites  
169 in the gene versus the chromosome. The *P* values were calculated using Poisson statistics,  
170 with False Discovery Rate (FDR) correction for multiple tests and a corrected *P* value <0.05  
171 as cutoff for selection of significant genes.

172

173 **Table S3. Common significant transposon targeted genes with  $\geq 1$  TTAA site present in**  
174 **both RKO *BRAF*<sup>wt/-</sup> and DLD-1 *KRAS*<sup>wt/-</sup> transposon mutagenized clone pools after**  
175 **selection in low glucose and hygromycin.** Significantly targeted genes in DLD-1 *KRAS*<sup>wt/-</sup>  
176 (Table S1) as well as RKO *BRAF*<sup>wt/-</sup> (Table S2) cell pools after selection in low glucose and  
177 hygromycin.

178

179 **Table S4. Pathway analysis of 483 common significant transposon targeted genes in**  
180 **RKO *BRAF*<sup>wt/-</sup> and DLD-1 *KRAS*<sup>wt/-</sup> clone pools identifies enrichment in CRC**  
181 **pathways.** A KEGG pathway analysis of the 483 common transposon targeted genes with  
182 significantly high count of transposon integrations (Supplementary Table S3).

183

184 **Table S5a. Pathway assignment of 163 genes with at least two unique transposon**  
185 **integration sites in both RKO *BRAF*<sup>wt/-</sup> and DLD-1 *KRAS*<sup>wt/-</sup> transposon mutagenized**  
186 **clone pools after selection in low glucose and hygromycin.** Primary publications in  
187 PubMed along with the Kyoto Encyclopedia of Genes and Genomes (KEGG Pathways) were  
188 searched (1) to determine whether the CIS genes were *bona fide* cancer genes (recurringly  
189 somatically mutated by point mutations, amplifications, deletions or translocations) in any



190 human tumor type, (2) for genetic or functional evidence for assignment to any of the  
191 canonical CRC pathways Wnt, EGFR/Ras/MAPK, PIK3CA, or TGFB, or to the Hippo and  
192 Rap1 pathways associated with EGFR/Ras/MAPK signaling, (3) for evidence for a role in  
193 intracellular glucose metabolism. Numbers, PubMed PMIDs of publication(s) supporting the  
194 assignment. KEGG, assignment to pathway based on KEGG Pathways. Mutual exclusivity  
195 was analysed as described ((4)). Briefly, MSS tumors from the COAD dataset, CNA with  
196 mutations data set along with mRNA expressions data were included and the mutual  
197 exclusivity was determined on the basis of Odds Ratio  $< 0.1$  with a P values  $< 0.05$  derived  
198 via Fisher's Exact test.

199

200 **Table S5b-d. Pathway assignments of 163 randomly sampled *ENSEMBL* features.**

201 Primary publications in PubMed along with the Kyoto Encyclopedia of Genes and Genomes  
202 (KEGG Pathways) were searched (1) to determine whether the genes were *bona fide* cancer  
203 genes (recurringly somatically mutated by point mutations, amplifications, deletions or  
204 translocations) in any human tumor type, (2) for genetic or functional evidence for  
205 assignment to any of the canonical CRC pathways Wnt, EGFR/Ras/MAPK, PIK3CA, or  
206 TGFB, or to the Hippo and Rap1 pathways associated with EGFR/Ras/MAPK signaling, (3)  
207 for evidence for a role in intracellular glucose metabolism. Numbers, PubMed PMIDs of  
208 publication(s) supporting the assignment. KEGG, assignment to pathway based on KEGG  
209 Pathways.

210

211 **Table S6. Barcoded primers for library amplification.** Barcodes were denoted with letters  
212 whereas the primer sequence was denoted with uppercase letters.

213

214 **Table S7. Target sequences for siRNAs and TaqMan probes for si/shRNA mediated**  
215 **gene knock-down.** Smart pools of three siRNAs and TaqMan assays used for analysing gene  
216 expression levels.

217

218 **Table S8. Lentivirus clones for shRNA mediated gene knock-down.** GIPZ shRNA  
219 lentiviral particle sets for three validated genes (FOXO3, NCOA3 and TCF7L2) along with  
220 two known Ras pathway genes (KRAS and BRAF).

221

222 **Table S9. Alterations in Ras pathway protein expression levels by stable knockdown of**  
223 **KRAS, FOXO3, NCOA3, and TCF7L2.** Lysates from stable shRNA knockdown cell lines  
224 in DLD-1 cells with or without mutant KRAS were subjected to global proteomics analysis.  
225 All proteins that were quantified with LC-MS and associated with the RAS pathway were  
226 subjected to a two sample two-tailed t-test corrected with permutation FDR against a control.  
227 The Pathway column is divided into 3 parts, pathway name, id and source, with the “#” as a  
228 delimiter. Proteins associated with several pathways have them given after each other also  
229 with “#” as the delimiter. Fold changes in the expression as compared to the shControl in  
230 respective genetic backgrounds are shown with significant changes ( $FDR \leq 0.05$ ) indicated.

231

232 **Table S10. *In silico* analysis of the GLUT1 (SLC2A1) promoter reveals binding sites for**  
233 **TCF7L2 and FOXO3.** *In silico* analyses were performed by JASPER  
234 (<http://jasper.genereg.net>) to determine whether binding sites for FOXO3, NCOA3 and  
235 TCF7L2 exist in the GLUT1 promoter (3kb upstream sequence of the initiation site of the  
236 GLUT1 gene). While the known positive regulator of GLUT1, HIF1A, had 38 binding sites  
237 with a median score of 5.27, this analysis revealed 16 and 13 binding sites for TCF7L2 and  
238 FOXO3 with a median score of 5.34 and 5.36, but no direct binding site for NCOA.

Table S1. Genes with significant transposon integrations in DLD-1 KRAS<sup>G12V</sup> cells after selection in low glucose medium.

| Gene ID        | Description                                                                                                    | Chrom | Start     | End       | # TTAAs sites | Expected | Observed | Libraries | P         | FDR       | Transposon |
|----------------|----------------------------------------------------------------------------------------------------------------|-------|-----------|-----------|---------------|----------|----------|-----------|-----------|-----------|------------|
| PCDH7          | protocadherin 7 [Source:HGNC Symbol;Acc:8659]                                                                  | chr3  | 30722037  | 31148422  | 3945          | 1.292    | 19       | 2         | 0.000E+00 | 0.000E+00 | PB-GT      |
| RAO51B         | RAO51B homolog B (S. cerevisiae) [Source:HGNC Symbol;Acc:9822]                                                 | chr4  | 62826496  | 63019303  | 60            | 0.411    | 15       | 2         | 2.342E-07 | 3.949E-06 | PB-GT      |
| ZBTB20         | zinc finger and BTB domain containing 20 [Source:HGNC Symbol;Acc:13503]                                        | chr3  | 114056941 | 114868118 | 7258          | 2.384    | 17       | 2         | 1.018E-10 | 8.829E-08 | PB-GT      |
| LINC00472      | long intergenic non-protein coding RNA 472 [Source:HGNC Symbol;Acc:21380]                                      | chr6  | 72054047  | 72130472  | 706           | 0.281    | 7        | 2         | 2.987E-10 | 1.618E-07 | PB-GT      |
| POF1           | polycomb target enhancer catalytic subunit 1 [Source:HGNC Symbol;Acc:9279]                                     | chr3  | 61857305  | 6207204   | 386           | 0.6      | 6        | 2         | 1.819E-07 | 1.029E-05 | PB-GT      |
| MIR313HG       | MIR313 host gene (non-protein coding) [Source:HGNC Symbol;Acc:37187]                                           | chr9  | 21455641  | 21559668  | 857           | 0.287    | 7        | 2         | 7.484E-10 | 3.247E-07 | PB-GT      |
| HMGCA2         | high mobility group A1-hook 2 [Source:HGNC Symbol;Acc:5009]                                                    | chr2  | 66217811  | 66360075  | 1139          | 0.503    | 8        | 2         | 3.995E-09 | 1.337E-06 | PB-GT      |
| PHLBD2         | pleckstrin homology-like domain, family B, member 2 [Source:HGNC Symbol;Acc:29573]                             | chr3  | 114451944 | 11466564  | 1609          | 0.601    | 8        | 2         | 1.638E-08 | 5.530E-06 | PB-GT      |
| NR2F2          | nuclear receptor subfamily 2, group F, member 2 [Source:HGNC Symbol;Acc:7976]                                  | chr15 | 96869167  | 96883462  | 92            | 0.034    | 3        | 1         | 5.307E-08 | 1.404E-05 | PB-GT      |
| SNORD4         | small nucleolar RNA, HACA box 4 [Source:HGNC Symbol;Acc:3267]                                                  | chr3  | 166550401 | 166550538 | 1             | 0.000    | 1        | 1         | 5.939E-08 | 1.404E-05 | PB-GT      |
| EIF4C2         | eukaryotic translation initiation factor 4 gamma [Source:HGNC Symbol;Acc:3297]                                 | chr11 | 10818597  | 10830957  | 97            | 0.036    | 3        | 2         | 6.200E-08 | 1.469E-06 | PB-GT      |
| HK2            | hexokinase 2 [Source:HGNC Symbol;Acc:4923]                                                                     | chr2  | 75061108  | 75120468  | 285           | 0.105    | 4        | 1         | 9.772E-08 | 2.120E-05 | PB-GT      |
| DLGAP1-AS2     | DLGAP1 antisense RNA 2 [Source:HGNC Symbol;Acc:28146]                                                          | chr18 | 3602988   | 3603334   | 29            | 0.009    | 2        | 2         | 1.322E-07 | 2.648E-05 | PB-GT      |
| PRK1           | pre-B-cell leukemia homeobox 1 [Source:HGNC Symbol;Acc:8532]                                                   | chr16 | 164542621 | 164888533 | 2215          | 0.765    | 8        | 2         | 1.539E-07 | 2.823E-05 | PB-GT      |
| C14orf182      | chromosome 14 open reading frame 182 [Source:HGNC Symbol;Acc:27503]                                            | chr14 | 50448300  | 5047428   | 125           | 0.045    | 3        | 2         | 1.627E-07 | 2.823E-05 | PB-GT      |
| PLCXD2-AS1     | PLCXD2 antisense RNA 1 [Source:HGNC Symbol;Acc:41145]                                                          | chr3  | 11339583  | 11398260  | 2             | 0.001    | 1        | 1         | 1.215E-07 | 3.506E-05 | PB-GT      |
| HIST1H1C       | histone cluster 1, H1c [Source:HGNC Symbol;Acc:4716]                                                           | chr6  | 20259968  | 20266899  | 2             | 0.001    | 1        | 1         | 2.497E-07 | 3.804E-05 | PB-GT      |
| SNHG8          | small nucleolar RNA host gene 8 (non-protein coding) [Source:HGNC Symbol;Acc:32395]                            | chr6  | 6783919   | 6783933   | 31            | 0.012    | 2        | 2         | 2.944E-07 | 4.257E-05 | PB-GT      |
| UCNHG          | urothelial cancer associated 1 (non-protein coding) [Source:HGNC Symbol;Acc:37126]                             | chr9  | 1593937   | 1597132   | 37            | 0.013    | 2        | 2         | 3.398E-07 | 4.652E-05 | PB-GT      |
| KRTAP4-12      | keratin associated protein 4-12 [Source:HGNC Symbol;Acc:16776]                                                 | chr7  | 39279343  | 3928019   | 2             | 0.001    | 1        | 1         | 5.612E-07 | 7.305E-05 | PB-GT      |
| DDX39B-AS1     | DDX39B antisense RNA 1 [Source:HGNC Symbol;Acc:39771]                                                          | chr6  | 31510081  | 31510915  | 4             | 0.001    | 1        | 1         | 9.984E-07 | 1.238E-04 | PB-GT      |
| ASIC3          | acid-sensing (proton-gated) ion channel 3 [Source:HGNC Symbol;Acc:1401]                                        | chr7  | 150745379 | 150749843 | 5             | 0.002    | 1        | 1         | 1.395E-06 | 1.650E-04 | PB-GT      |
| OR5M11         | olfactory receptor, family 5, subfamily M, member 11 [Source:HGNC Symbol;Acc:14847]                            | chr11 | 5410607   | 5411664   | 5             | 0.002    | 1        | 1         | 1.654E-06 | 1.871E-04 | PB-GT      |
| MUV1           | murine retrovirus integration site 1 homolog [Source:HGNC Symbol;Acc:7237]                                     | chr11 | 10594638  | 10715535  | 532           | 0.194    | 4        | 2         | 1.830E-06 | 2.093E-04 | PB-GT      |
| ATFV1G2-DDX39B | ATFV1G2/DDX39B readthrough (non-protein coding) [Source:HGNC Symbol;Acc:41999]                                 | chr6  | 314927956 | 31791265  | 68            | 0.024    | 2        | 2         | 2.272E-06 | 2.309E-04 | PB-GT      |
| SIAH1          | siah 1 ubiquitin protein ligase 1 [Source:HGNC Symbol;Acc:10857]                                               | chr16 | 48300275  | 48342133  | 466           | 0.201    | 4        | 1         | 2.306E-06 | 2.309E-04 | PB-GT      |
| EIF2S24        | eukaryotic translation initiation factor 2, subunit 2 beta pseudogene 4 [Source:HGNC Symbol;Acc:37626]         | chr2  | 171698221 | 171699562 | 6             | 0.002    | 1        | 1         | 2.442E-06 | 2.355E-04 | PB-GT      |
| ARF5           | ADP-ribosyltransferase 5 [Source:HGNC Symbol;Acc:20408]                                                        | chr11 | 3659733   | 3663419   | 15            | 0.003    | 5        | 2         | 3.238E-06 | 3.007E-04 | PB-GT      |
| CCAT1          | colon cancer associated transcript 1 (non-protein coding) [Source:HGNC Symbol;Acc:45128]                       | chr8  | 128220111 | 128231333 | 70            | 0.027    | 2        | 2         | 3.351E-06 | 3.007E-04 | PB-GT      |
| KRT18          | keratin 18 [Source:HGNC Symbol;Acc:9430]                                                                       | chr2  | 53342655  | 53346685  | 6             | 0.003    | 1        | 1         | 3.800E-06 | 3.036E-04 | PB-GT      |
| TXNRD1         | thioredoxin reductase 1 [Source:HGNC Symbol;Acc:12437]                                                         | chr12 | 249629507 | 249740611 | 903           | 0.4      | 4        | 2         | 4.481E-06 | 3.653E-04 | PB-GT      |
| ARHGAP18       | Rho GTPase activating protein 18 [Source:HGNC Symbol;Acc:21035]                                                | chr6  | 126897277 | 13003170  | 1153          | 0.408    | 5        | 2         | 4.491E-06 | 3.653E-04 | PB-GT      |
| PRDX2          | peroxiredoxin 2 [Source:HGNC Symbol;Acc:9353]                                                                  | chr19 | 12007324  | 12012894  | 9             | 0.003    | 1        | 1         | 4.775E-06 | 3.695E-04 | PB-GT      |
| RPL18          | ribosomal protein L18 [Source:HGNC Symbol;Acc:10310]                                                           | chr9  | 61185865  | 61212793  | 9             | 0.003    | 1        | 1         | 4.819E-06 | 3.695E-04 | PB-GT      |
| RBM14          | RNA binding motif protein 14 [Source:HGNC Symbol;Acc:14219]                                                    | chr11 | 66384053  | 66406124  | 87            | 0.032    | 2        | 1         | 5.166E-06 | 3.842E-04 | PB-GT      |
| SPIN4-AS1      | SPIN4 antisense RNA 1 [Source:HGNC Symbol;Acc:41777]                                                           | chr3  | 62569525  | 62572067  | 20            | 0.003    | 1        | 1         | 5.540E-06 | 3.852E-04 | PB-GT      |
| ULAP1          | UDP-N-acetyl-alpha-D-glucosaminyl 6-phosphate 4-epimerase 7 (GalNAc-1T7) [Source:HGNC Symbol;Acc:4120]         | chr3  | 74609904  | 74634118  | 19            | 0.003    | 1        | 1         | 6.123E-06 | 3.852E-04 | PB-GT      |
| EVAC1          | eva-1 homolog C (C. elegans) [Source:HGNC Symbol;Acc:13239]                                                    | chr21 | 3378414   | 33887707  | 446           | 0.113    | 3        | 2         | 6.168E-06 | 3.852E-04 | PB-GT      |
| GNAT4          | guanine nucleotide binding protein (G protein), alpha 14 [Source:HGNC Symbol;Acc:4382]                         | chr9  | 60037995  | 60262223  | 132           | 0.433    | 5        | 2         | 6.319E-06 | 3.852E-04 | PB-GT      |
| SIBP4          | synaptic binding protein 4 [Source:HGNC Symbol;Acc:25500]                                                      | chr2  | 235869017 | 23594359  | 308           | 0.24     | 4        | 2         | 6.324E-06 | 3.852E-04 | PB-GT      |
| MLL2           | myeloid/lymphoid or mixed-lineage leukemia 2 [Source:HGNC Symbol;Acc:7133]                                     | chr12 | 49412758  | 49453557  | 77            | 0.034    | 2        | 2         | 6.376E-06 | 3.852E-04 | PB-GT      |
| NFKB1A         | nuclear factor kappa light polypeptide gene enhancer in B-cells inhibitor, alpha [Source:HGNC Symbol;Acc:4797] | chr4  | 25070717  | 25073916  | 10            | 0.004    | 1        | 1         | 6.422E-06 | 3.852E-04 | PB-GT      |
| ZBED2          | zinc finger, BED-type containing 2 [Source:HGNC Symbol;Acc:20710]                                              | chr3  | 11311747  | 11314250  | 11            | 0.004    | 1        | 1         | 6.512E-06 | 3.852E-04 | PB-GT      |
| FRZC2          | FZD homolog 2 family, member C [Source:HGNC Symbol;Acc:33626]                                                  | chr3  | 75713481  | 75718371  | 11            | 0.004    | 1        | 1         | 6.512E-06 | 3.852E-04 | PB-GT      |
| SMIM2-AS1      | SMIM2 antisense RNA 1 [Source:HGNC Symbol;Acc:42674]                                                           | chr3  | 115146562 | 115149310 | 478           | 0.006    | 2        | 2         | 6.741E-06 | 3.852E-04 | PB-GT      |
| HIST1H2BC      | histone cluster 1, H2bc [Source:HGNC Symbol;Acc:4757]                                                          | chr6  | 26115101  | 26124154  | 101           | 0.004    | 1        | 1         | 7.381E-06 | 4.157E-04 | PB-GT      |
| TNFRSF12A      | tumor necrosis factor receptor superfamily, member 12A [Source:HGNC Symbol;Acc:18152]                          | chr18 | 3988446   | 3972384   | 84            | 0.004    | 1        | 1         | 7.506E-06 | 4.157E-04 | PB-GT      |
| ARHGAP28       | Rho GTPase activating protein 28 [Source:HGNC Symbol;Acc:25500]                                                | chr6  | 6728117   | 67301115  | 1412          | 0.512    | 5        | 2         | 8.031E-06 | 3.959E-04 | PB-GT      |
| PRKAG1         | protein kinase, AMP-activated, gamma 1 non-catalytic subunit [Source:HGNC Symbol;Acc:9385]                     | chr12 | 43905607  | 49412980  | 84            | 0.037    | 2        | 2         | 8.258E-06 | 4.385E-04 | PB-GT      |
| MTUS1          | microtubule associated tumor suppressor 1 [Source:HGNC Symbol;Acc:29789]                                       | chr8  | 17501304  | 17558426  | 1165          | 0.456    | 5        | 2         | 8.424E-06 | 4.385E-04 | PB-GT      |
| CDN1           | CDN-dependent kinase 3 [Source:HGNC Symbol;Acc:1772]                                                           | chr17 | 73969897  | 74032080  | 19            | 0.004    | 1        | 1         | 8.482E-06 | 4.486E-04 | PB-GT      |
| TNK1           | tyrosine kinase, non-receptor, 1 [Source:HGNC Symbol;Acc:11940]                                                | chr17 | 7283853   | 7293093   | 8             | 0.004    | 1        | 1         | 8.961E-06 | 4.486E-04 | PB-GT      |
| LIPC           | lipase, hepatic [Source:HGNC Symbol;Acc:8616]                                                                  | chr15 | 58702768  | 58861151  | 737           | 0.271    | 4        | 2         | 9.177E-06 | 4.702E-04 | PB-GT      |
| MTNDEP28       | MTNDEP pseudogene 28 [Source:HGNC Symbol;Acc:42290]                                                            | chr12 | 20972707  | 20974955  | 12            | 0.004    | 1        | 1         | 9.765E-06 | 7.022E-04 | PB-GT      |
| FOSB           | FBJ murine osteosarcoma viral oncogene homolog 3 [Source:HGNC Symbol;Acc:3797]                                 | chr19 | 45971253  | 45978437  | 13            | 0.004    | 1        | 1         | 9.953E-06 | 4.711E-04 | PB-GT      |
| CALHM2         | calcium homeostasis modulator 2 [Source:HGNC Symbol;Acc:29493]                                                 | chr10 | 102026543 | 10212660  | 11            | 0.005    | 1        | 1         | 1.116E-05 | 5.050E-04 | PB-GT      |
| DCIL2          | DCIL, CUB and LCL2 domain containing 2 [Source:HGNC Symbol;Acc:24627]                                          | chr6  | 98514765  | 98620523  | 850           | 0.304    | 4        | 2         | 1.121E-05 | 5.050E-04 | PB-GT      |
| CKNK5          | potassium channel, subfamily K, member 5 [Source:HGNC Symbol;Acc:6280]                                         | chr6  | 39156749  | 39197226  | 117           | 0.041    | 2        | 2         | 1.143E-05 | 5.050E-04 | PB-GT      |
| CRYGA          | crystallin, gamma A [Source:HGNC Symbol;Acc:2406]                                                              | chr2  | 29022454  | 29028300  | 13            | 0.005    | 1        | 1         | 1.145E-05 | 5.050E-04 | PB-GT      |
| RHR23B3        | RHR-related BTB domain containing 3 [Source:HGNC Symbol;Acc:18757]                                             | chr5  | 50432526  | 50432526  | 1             | 0.005    | 1        | 1         | 1.145E-05 | 5.050E-04 | PB-GT      |
| OLR1           | oxidized low density lipoprotein (lectin-like) receptor 1 [Source:HGNC Symbol;Acc:8133]                        | chr12 | 10310902  | 10324737  | 98            | 0.043    | 2        | 1         | 1.305E-05 | 5.508E-04 | PB-GT      |
| ACTR1B         | ARF1 actin-related protein 1 homolog B, centrinin beta yeast [Source:HGNC Symbol;Acc:168]                      | chr2  | 98272431  | 98282670  | 14            | 0.005    | 1        | 1         | 1.327E-05 | 5.508E-04 | PB-GT      |
| FRS2B          | fibroblast growth factor receptor tyrosine kinase 2 [Source:HGNC Symbol;Acc:2720]                              | chr16 | 856443    | 856443    | 1             | 0.005    | 1        | 1         | 1.333E-05 | 5.508E-04 | PB-GT      |
| ELGN2          | egl nlg homolog 2 (C. elegans) [Source:HGNC Symbol;Acc:14660]                                                  | chr19 | 41304901  | 41314388  | 16            | 0.005    | 1        | 1         | 1.507E-05 | 6.128E-04 | PB-GT      |
| SLC25A25       | solute carrier family 25 (mitochondrial carrier, phosphate carrier), member 25 [Source:HGNC Symbol;Acc:20663]  | chr9  | 103830040 | 103871524 | 143           | 0.047    | 2        | 1         | 1.686E-05 | 6.633E-04 | PB-GT      |
| PCOLCE         | prolyl 4-hydroxylase (DNA directed) polypeptide G [Source:HGNC Symbol;Acc:9184]                                | chr7  | 62529010  | 62534118  | 18            | 0.007    | 1        | 1         | 1.729E-05 | 6.640E-04 | PB-GT      |
| MET            | met proto-oncogene (hepatocyte growth factor receptor) [Source:HGNC Symbol;Acc:7029]                           | chr7  | 11813244  | 11643844  | 915           | 0.306    | 4        | 2         | 1.729E-05 | 6.640E-04 | PB-GT      |
| MYL9           | myosin, light chain 9, regulatory [Source:HGNC Symbol;Acc:15754]                                               | chr20 | 51598987  | 51599228  | 18            | 0.007    | 1        | 1         | 1.763E-05 | 6.640E-04 | PB-GT      |
| MYL9-AS1       | myosin, light chain 9, regulatory antisense 1 [Source:HGNC Symbol;Acc:15754]                                   | chr20 | 105974169 | 106004960 | 402           | 0.148    | 3        | 2         | 1.785E-05 | 6.640E-04 | PB-GT      |
| HIST1H3J       | histone cluster 1, H3j [Source:HGNC Symbol;Acc:4774]                                                           | chr3  | 27858093  | 27860884  | 17            | 0.006    | 1        | 1         | 1.798E-05 | 6.640E-04 | PB-GT      |
| MBNL2          | muscleblind like splicing regulator 2 [Source:HGNC Symbol;Acc:16746]                                           | chr13 | 95273199  | 95803774  | 1280          | 0.4      | 4        | 2         | 1.806E-05 | 6.640E-04 | PB-GT      |
| DNAJ12         | DnaJ (Hsp40) homolog, subfamily C, member 12 [Source:HGNC Symbol;Acc:25556]                                    | chr15 | 41060087  | 41099165  | 132           | 0.049    | 2        | 2         | 1.837E-05 | 6.640E-04 | PB-GT      |
| KRT17          | keratin 17 (histone deacetylase inducible) [Source:HGNC Symbol;Acc:6438]                                       | chr17 | 39079848  | 39093886  | 94            | 0.050    | 2        | 1         | 1.859E-05 | 7.077E-04 | PB-GT      |
| VMP1           | viral protein 1 [Source:HGNC Symbol;Acc:24559]                                                                 | chr15 | 67784552  | 67791616  | 1005          | 0.369    | 4        | 2         | 1.862E-05 | 7.077E-04 | PB-GT      |
| OFML2B         | orfamide-like 2B [Source:HGNC Symbol;Acc:24558]                                                                | chr1  | 161952660 | 161993644 | 145           | 0.051    | 2        | 1         | 1.214E-05 | 7.546E-04 | PB-GT      |
| SPIN4          | spinin family, member 4 [Source:HGNC Symbol;Acc:27040]                                                         | chr3  | 62567107  | 62571233  | 40            | 0.007    | 1        | 1         | 2.211E-05 | 7.573E-04 | PB-GT      |
| DLGAP1-AS1     | DLGAP1 antisense RNA 1 [Source:HGNC Symbol;Acc:1678]                                                           | chr18 | 3602988   | 3603334   | 29            | 0.007    | 1        | 1         | 2.211E-05 | 7.573E-04 | PB-GT      |
| REG1A          | regulator of G-protein signaling 14 [Source:HGNC Symbol;Acc:9596]                                              | chr5  | 16784838  | 16789622  | 13            | 0.007    | 1        | 1         | 2.340E-05 |           |            |

Table S1. Genes with significant transposon integrations in DLD-1 KRAS<sup>G12V</sup> cells after selection in low glucose medium.

| Gene ID        | Description                                                                                 | Chrom | Start     | End       | # TTAAs sites | Expected | Observed | Libraries | P         | FDR       | Transposon |
|----------------|---------------------------------------------------------------------------------------------|-------|-----------|-----------|---------------|----------|----------|-----------|-----------|-----------|------------|
| TIW1S1         | twist basic helix-loop-helix transcription factor 1 [Source:HGNC Symbol;Acc:12428]          | chr7  | 19060114  | 19157296  | 748           | 0.250    | 3        | 2         | 1.333E-04 | 2.158E-03 | PB-GT      |
| ELF5           | elongator acyltransferase complex subunit 5 [Source:HGNC Symbol;Acc:30617]                  | chr19 | 71543502  | 71635000  | 31            | 0.016    | 1        | 1         | 1.333E-04 | 2.158E-03 | PB-GT      |
| ZFP42          | ZFP42 zinc finger protein [Source:HGNC Symbol;Acc:30949]                                    | chr4  | 188918925 | 18926204  | 51            | 0.017    | 1        | 1         | 1.380E-04 | 2.218E-03 | PB-GT      |
| CD300L3G       | CD300 molecule-like family member g [Source:HGNC Symbol;Acc:30455]                          | chr7  | 14924516  | 14940997  | 32            | 0.017    | 1        | 1         | 1.422E-04 | 2.270E-03 | PB-GT      |
| ATXN1L         | ataxin 1-like [Source:HGNC Symbol;Acc:32379]                                                | chr16 | 11872894  | 11873221  | 40            | 0.017    | 1        | 1         | 1.465E-04 | 2.317E-03 | PB-GT      |
| SPINK1         | serine peptidase inhibitor, Kazal type 1 [Source:HGNC Symbol;Acc:11244]                     | chr5  | 147204131 | 14721349  | 53            | 0.017    | 1        | 1         | 1.480E-04 | 2.317E-03 | PB-GT      |
| RTKN           | retinoblastoma [Source:HGNC Symbol;Acc:10468]                                               | chr2  | 74622963  | 74669549  | 47            | 0.017    | 1        | 1         | 1.484E-04 | 2.317E-03 | PB-GT      |
| PLD2           | phospholipase D2 [Source:HGNC Symbol;Acc:9058]                                              | chr17 | 4710391   | 4729729   | 33            | 0.017    | 1        | 1         | 1.511E-04 | 2.317E-03 | PB-GT      |
| ITIH2          | inter-alpha-trypsin inhibitor heavy chain 2 [Source:HGNC Symbol;Acc:6167]                   | chr10 | 7745232   | 7791483   | 231           | 0.099    | 2        | 1         | 1.523E-04 | 2.317E-03 | PB-GT      |
| ADORA1         | adenosine A1 receptor [Source:HGNC Symbol;Acc:262]                                          | chr20 | 203098702 | 203136533 | 281           | 0.100    | 2        | 2         | 1.527E-04 | 2.317E-03 | PB-GT      |
| IFIT7          | interferon, alpha-inducible protein 7 [Source:HGNC Symbol;Acc:5397]                         | chr14 | 94371162  | 94859033  | 49            | 0.019    | 1        | 1         | 1.528E-04 | 2.317E-03 | PB-GT      |
| MAP3K14        | mitogen-activated protein kinase kinase kinase 14 [Source:HGNC Symbol;Acc:8853]             | chr17 | 43340488  | 43394414  | 188           | 0.100    | 2        | 1         | 1.530E-04 | 2.317E-03 | PB-GT      |
| NOV            | neurofiblastoma overexpressed [Source:HGNC Symbol;Acc:7855]                                 | chr8  | 120428948 | 120435953 | 45            | 0.018    | 1        | 1         | 1.531E-04 | 2.317E-03 | PB-GT      |
| EF1E1B         | eukaryotic translation initiation factor 4E family member 1B [Source:HGNC Symbol;Acc:33179] | chr5  | 176037653 | 17607842  | 55            | 0.018    | 1        | 1         | 1.563E-04 | 2.391E-03 | PB-GT      |
| FGD2           | FYVE, RhoGEF and PH domain containing 2 [Source:HGNC Symbol;Acc:3664]                       | chr6  | 36973422  | 36998846  | 51            | 0.018    | 1        | 1         | 1.605E-04 | 2.391E-03 | PB-GT      |
| UBE2L3         | ubiquitin-conjugating enzyme E2L3 [Source:HGNC Symbol;Acc:12488]                            | chr22 | 21903736  | 21978323  | 240           | 0.101    | 2        | 2         | 1.607E-04 | 2.391E-03 | PB-GT      |
| SMAD9          | SMAD family member 9 [Source:HGNC Symbol;Acc:9772]                                          | chr15 | 68994666  | 69074338  | 280           | 0.103    | 2        | 1         | 1.683E-04 | 2.496E-03 | PB-GT      |
| CRYBA1         | crystallin, beta A1 [Source:HGNC Symbol;Acc:2394]                                           | chr17 | 27573881  | 27581512  | 35            | 0.019    | 1        | 1         | 1.699E-04 | 2.496E-03 | PB-GT      |
| CRKLC1         | CXCR3 ligand 1 [Source:HGNC Symbol;Acc:293]                                                 | chr5  | 13902884  | 13906347  | 57            | 0.019    | 1        | 1         | 1.711E-04 | 2.502E-03 | PB-GT      |
| TACC3          | transcription, acidic coiled-coil containing protein 3 [Source:HGNC Symbol;Acc:11524]       | chr4  | 1723227   | 1746898   | 57            | 0.019    | 1        | 1         | 1.722E-04 | 2.503E-03 | PB-GT      |
| EIF4A2         | eukaryotic translation initiation factor 4A2 [Source:HGNC Symbol;Acc:3284]                  | chr3  | 186500994 | 18650789  | 57            | 0.019    | 1        | 1         | 1.731E-04 | 2.503E-03 | PB-GT      |
| ARHGAP1        | arrested GTPase activating protein 1 [Source:HGNC Symbol;Acc:684]                           | chr19 | 42387228  | 42434302  | 55            | 0.019    | 1        | 1         | 1.764E-04 | 2.523E-03 | PB-GT      |
| ANXA10         | annexin A10 [Source:HGNC Symbol;Acc:534]                                                    | chr4  | 169013666 | 169108841 | 823           | 0.270    | 3        | 2         | 1.777E-04 | 2.523E-03 | PB-GT      |
| HMGN1          | high mobility group nucleosome binding domain 1 [Source:HGNC Symbol;Acc:4981]               | chr21 | 40714241  | 40721573  | 75            | 0.019    | 1        | 1         | 1.778E-04 | 2.523E-03 | PB-GT      |
| CK2S2          | casein kinase II protein kinase regulatory subunit 2 [Source:HGNC Symbol;Acc:2003]          | chr9  | 9192313   | 91931618  | 58            | 0.019    | 1        | 1         | 1.784E-04 | 2.523E-03 | PB-GT      |
| DHX16          | DEAH (Asp-Glu-Ala-His) box polypeptide 16 [Source:HGNC Symbol;Acc:2739]                     | chr6  | 30620886  | 30640814  | 54            | 0.019    | 1        | 1         | 1.798E-04 | 2.530E-03 | PB-GT      |
| SAP30L         | SAP30-like [Source:HGNC Symbol;Acc:2563]                                                    | chr5  | 15382517  | 15383891  | 59            | 0.019    | 1        | 1         | 1.832E-04 | 2.553E-03 | PB-GT      |
| NLRK1          | NLR family member X1 [Source:HGNC Symbol;Acc:28690]                                         | chr11 | 19007277  | 19029475  | 53            | 0.020    | 1        | 1         | 1.838E-04 | 2.553E-03 | PB-GT      |
| RTEL1          | regulator of telomere elongation helicase 1 [Source:HGNC Symbol;Acc:15888]                  | chr20 | 62289163  | 62328416  | 52            | 0.019    | 1        | 1         | 1.844E-04 | 2.553E-03 | PB-GT      |
| SOC3S          | suppressor of cytokine signaling 6 [Source:HGNC Symbol;Acc:1833]                            | chr18 | 67956137  | 67997436  | 334           | 0.107    | 2        | 1         | 1.878E-04 | 2.586E-03 | PB-GT      |
| RAH48-EGLN2    | RAH48-EGLN2 (non-protein coding) [Source:HGNC Symbol;Acc:44465]                             | chr7  | 1284147   | 12841103  | 62            | 0.020    | 1        | 1         | 1.884E-04 | 2.586E-03 | PB-GT      |
| DDX39B         | DEAD (Asp-Glu-Ala-Asp) box polypeptide 39B [Source:HGNC Symbol;Acc:13917]                   | chr6  | 31497986  | 31510225  | 56            | 0.020    | 1        | 1         | 1.933E-04 | 2.634E-03 | PB-GT      |
| ZNF565         | zinc finger protein 565 [Source:HGNC Symbol;Acc:28726]                                      | chr19 | 36673188  | 36737159  | 315           | 0.108    | 2        | 1         | 1.951E-04 | 2.645E-03 | PB-GT      |
| GAA            | glucosylase alpha chain [Source:HGNC Symbol;Acc:4065]                                       | chr17 | 78073365  | 78097876  | 34            | 0.020    | 1        | 1         | 1.952E-04 | 2.645E-03 | PB-GT      |
| EEF1A1         | eukaryotic translation elongation factor 1 alpha [Source:HGNC Symbol;Acc:3189]              | chr6  | 74225473  | 74233020  | 57            | 0.020    | 1        | 1         | 1.962E-04 | 2.662E-03 | PB-GT      |
| GASS           | growth arrest-specific 5 (non-protein coding) [Source:HGNC Symbol;Acc:16355]                | chr1  | 173833038 | 173836020 | 57            | 0.020    | 1        | 1         | 1.972E-04 | 2.662E-03 | PB-GT      |
| PRDM1          | PRDM domain 1 [Source:HGNC Symbol;Acc:3392]                                                 | chr16 | 48997808  | 49028719  | 58            | 0.020    | 1        | 1         | 1.973E-04 | 2.662E-03 | PB-GT      |
| BMF            | Bcl2 modifying factor [Source:HGNC Symbol;Acc:24132]                                        | chr15 | 40380091  | 40401093  | 55            | 0.020    | 1        | 1         | 1.974E-04 | 2.662E-03 | PB-GT      |
| SHC2           | SRC homology 2 domain containing transforming protein 2 [Source:HGNC Symbol;Acc:29869]      | chr19 | 415653    | 409098    | 59            | 0.020    | 1        | 1         | 1.975E-04 | 2.662E-03 | PB-GT      |
| CHORDC9        | Chromosome 9 open reading frame 4 [Source:HGNC Symbol;Acc:2343]                             | chr7  | 77561487  | 77567802  | 62            | 0.020    | 1        | 1         | 1.976E-04 | 2.662E-03 | PB-GT      |
| MORC1-AS1      | MORC1 antisense RNA 1 [Source:HGNC Symbol;Acc:40377]                                        | chr3  | 108220303 | 108228189 | 62            | 0.020    | 1        | 1         | 1.976E-04 | 2.662E-03 | PB-GT      |
| NANOG          | Nanog transcription factor [Source:HGNC Symbol;Acc:20557]                                   | chr20 | 6240390   | 6248255   | 47            | 0.020    | 1        | 1         | 1.977E-04 | 2.662E-03 | PB-GT      |
| RTEL1-TNFRSF6B | RTEL1-TNFRSF6B readthrough (non-protein coding) [Source:HGNC Symbol;Acc:44095]              | chr20 | 62290553  | 62330037  | 56            | 0.021    | 1        | 1         | 1.977E-04 | 2.662E-03 | PB-GT      |
| KDM5C          | lysine (K)-specific demethylase 5 [Source:HGNC Symbol;Acc:11114]                            | chrX  | 53220503  | 53254064  | 125           | 0.021    | 1        | 1         | 1.978E-04 | 2.662E-03 | PB-GT      |
| LCOR           | leucine dependent nuclear receptor corepressor [Source:HGNC Symbol;Acc:25503]               | chr10 | 86592017  | 86704000  | 122           | 0.020    | 1        | 1         | 1.978E-04 | 2.662E-03 | PB-GT      |
| GTSE1          | GTSE activating protein (SH3 domain) binding protein 1 [Source:HGNC Symbol;Acc:30929]       | chr5  | 151150669 | 151192446 | 366           | 0.113    | 2        | 2         | 1.979E-04 | 2.662E-03 | PB-GT      |
| SERPINB1       | serpin peptidase inhibitor, clade B (ovalbumin), member 1 [Source:HGNC Symbol;Acc:3341]     | chr6  | 2832566   | 2842240   | 60            | 0.021    | 1        | 1         | 1.979E-04 | 2.662E-03 | PB-GT      |
| RAM3P          | rasal protein-coupled activity modifying protein 3 [Source:HGNC Symbol;Acc:9916]            | chr7  | 45197390  | 45209801  | 64            | 0.021    | 1        | 1         | 1.979E-04 | 2.662E-03 | PB-GT      |
| ANKRD49        | ankyrin repeat domain 49 [Source:HGNC Symbol;Acc:29970]                                     | chr11 | 94228795  | 94232749  | 59            | 0.021    | 1        | 1         | 1.979E-04 | 2.662E-03 | PB-GT      |
| DUPS9          | dual specificity phosphatase 5 [Source:HGNC Symbol;Acc:3071]                                | chr10 | 112257996 | 11227302  | 50            | 0.022    | 1        | 1         | 1.979E-04 | 2.662E-03 | PB-GT      |
| CD27           | CD27 antisense RNA 1 [Source:HGNC Symbol;Acc:43896]                                         | chr12 | 6545167   | 6545733   | 49            | 0.022    | 1        | 1         | 1.979E-04 | 2.662E-03 | PB-GT      |
| AP0D           | apolipoprotein D [Source:HGNC Symbol;Acc:612]                                               | chr3  | 19529573  | 19531076  | 66            | 0.022    | 1        | 1         | 1.979E-04 | 2.662E-03 | PB-GT      |
| SULT1C4        | sulfotransferase family, cytochrome, 1C, member 4 [Source:HGNC Symbol;Acc:11457]            | chr2  | 108994367 | 109004513 | 59            | 0.022    | 1        | 1         | 1.979E-04 | 2.662E-03 | PB-GT      |
| ZNF7           | zinc finger protein 7 [Source:HGNC Symbol;Acc:13139]                                        | chr8  | 146052849 | 146072894 | 66            | 0.022    | 1        | 1         | 1.979E-04 | 2.662E-03 | PB-GT      |
| POU5F1         | POU class 5 homeobox 1 [Source:HGNC Symbol;Acc:9221]                                        | chr6  | 31302523  | 31348508  | 52            | 0.022    | 1        | 1         | 1.979E-04 | 2.662E-03 | PB-GT      |
| SMAD2          | SMAD family member 2 [Source:HGNC Symbol;Acc:6788]                                          | chr18 | 45379222  | 45457515  | 910           | 0.291    | 3        | 2         | 1.979E-04 | 2.662E-03 | PB-GT      |
| LINC00700      | long intergenic non-protein coding RNA 700 [Source:HGNC Symbol;Acc:27422]                   | chr10 | 2047691   | 2047691   | 51            | 0.022    | 1        | 1         | 1.979E-04 | 2.662E-03 | PB-GT      |
| TARSK2         | threonine-RNA synthetase 2, mitochondrial (putative) [Source:HGNC Symbol;Acc:30740]         | chr1  | 150458887 | 150480078 | 62            | 0.022    | 1        | 1         | 1.979E-04 | 2.662E-03 | PB-GT      |
| LMK1           | LMK domain kinase 1 [Source:HGNC Symbol;Acc:6613]                                           | chr7  | 73497283  | 73538658  | 66            | 0.022    | 1        | 1         | 1.979E-04 | 2.662E-03 | PB-GT      |
| RFXO3          | RFX domain protein, fox-1 homolog (C. elegans) 3 [Source:HGNC Symbol;Acc:27087]             | chr17 | 7108427   | 7115350   | 1022          | 0.342    | 3        | 2         | 1.979E-04 | 2.662E-03 | PB-GT      |
| MORN3          | MORN repeat containing 3 [Source:HGNC Symbol;Acc:29807]                                     | chr12 | 122089004 | 122110537 | 51            | 0.023    | 1        | 1         | 1.979E-04 | 2.662E-03 | PB-GT      |
| LEM1           | LEM domain containing 1 [Source:HGNC Symbol;Acc:16725]                                      | chr1  | 26320506  | 20542082  | 353           | 0.118    | 2        | 1         | 1.979E-04 | 2.662E-03 | PB-GT      |
| LAO1           | lysine oxidase 1 [Source:HGNC Symbol;Acc:6472]                                              | chr14 | 31044272  | 31082763  | 34            | 0.023    | 1        | 1         | 1.979E-04 | 2.662E-03 | PB-GT      |
| DUSP18         | dual specificity phosphatase 18 [Source:HGNC Symbol;Acc:18484]                              | chr22 | 31048308  | 31061877  | 54            | 0.023    | 1        | 1         | 1.979E-04 | 2.662E-03 | PB-GT      |
| ER1            | erythrocyte zinc 1 [Source:HGNC Symbol;Acc:23994]                                           | chr8  | 8856661   | 8974256   | 760           | 0.297    | 3        | 2         | 1.979E-04 | 2.662E-03 | PB-GT      |
| NSD1           | nucleosome deacetylase [Source:HGNC Symbol;Acc:4122]                                        | chr16 | 8899142   | 89923719  | 53            | 0.023    | 1        | 1         | 1.979E-04 | 2.662E-03 | PB-GT      |
| ZFP62          | ZFP62 zinc finger protein [Source:HGNC Symbol;Acc:23241]                                    | chr5  | 18027461  | 18028286  | 70            | 0.023    | 1        | 1         | 1.979E-04 | 2.662E-03 | PB-GT      |
| ZNF385A        | zinc finger protein 385A [Source:HGNC Symbol;Acc:19321]                                     | chr12 | 5478761   | 5480580   | 49            | 0.023    | 1        | 1         | 1.979E-04 | 2.662E-03 | PB-GT      |
| MPS10          | mitochondrial ribosomal protein S10 [Source:HGNC Symbol;Acc:14502]                          | chr6  | 21744539  | 2182603   | 65            | 0.023    | 1        | 1         | 1.979E-04 | 2.662E-03 | PB-GT      |
| DEDD           | death effector domain containing [Source:HGNC Symbol;Acc:2755]                              | chr16 | 16100764  | 161102478 | 65            | 0.023    | 1        | 1         | 1.979E-04 | 2.662E-03 | PB-GT      |
| SYT2           | SYT2 homolog, RNA splicing (S. cerevisiae) [Source:HGNC Symbol;Acc:18624]                   | chr1  | 75491070  | 75495893  | 54            | 0.023    | 1        | 1         | 1.979E-04 | 2.662E-03 | PB-GT      |
| ARHGAP35       | Rho GTPase activating protein 35 [Source:HGNC Symbol;Acc:4591]                              | chr19 | 47421933  | 47508334  | 350           | 0.120    | 2        | 1         | 1.979E-04 | 2.662E-03 | PB-GT      |
| TUBA4B         | tubulin, alpha 4B (pseudogene) [Source:HGNC Symbol;Acc:18637]                               | chr2  | 220117965 | 220139910 | 63            | 0.023    | 1        | 1         | 1.979E-04 | 2.662E-03 | PB-GT      |
| NUP210L        | NUP210-like [Source:HGNC Symbol;Acc:29015]                                                  | chr1  | 15385811  | 15727659  | 847           | 0.299    | 3        | 2         | 1.979E-04 | 2.662E-03 | PB-GT      |
| T0B1           | transducer of ERBB2, 1 [Source:HGNC Symbol;Acc:11979]                                       | chr17 | 48939584  | 48945339  | 44            | 0.023    | 1        | 1         | 1.979E-04 | 2.662E-03 | PB-GT      |
| EPHA2IP1       | src homone-binding protein [Source:HGNC Symbol;Acc:10839]                                   | chr17 | 7517382   | 7536700   | 44            | 0.023    | 1        | 1         | 1.979E-04 | 2.662E-03 | PB-GT      |
| TNN1           | tropomyosin 1 (skel., slow) [Source:HGNC Symbol;Acc:11945]                                  | chr10 | 201373625 | 20138994  | 66            | 0.023    | 1        | 1         | 1.979E-04 | 2.662E-03 | PB-GT      |
| CD3B           | chromosome 3 open reading frame 3B [Source:HGNC Symbol;Acc:28384]                           | chr3  | 89198893  | 89207118  | 73            | 0.024    | 1        | 1         | 1.979E-04 | 2.662E-03 | PB-GT      |
| CYTH4          | cytochrome 4 [Source:HGNC Symbol;Acc:9505]                                                  | chr22 | 16767868  | 16771138  | 57            | 0.024    | 1        | 1         | 1.979E-04 | 2.662E-03 | PB-GT      |
|                |                                                                                             |       |           |           |               |          |          |           |           |           |            |

Table S1. Genes with significant transposon integrations in DLD-1 KRAS<sup>G12V</sup> cells after selection in low glucose medium.

| Gene ID   | Description                                                                                                   | Chrom | Start     | End       | # TTAG sites | Expected | Observed | Libraries | P         | FDR       | Transposon |
|-----------|---------------------------------------------------------------------------------------------------------------|-------|-----------|-----------|--------------|----------|----------|-----------|-----------|-----------|------------|
| HIST1H2AC | histone cluster 1, H2ac [Source:HGNC Symbol;Acc:4733]                                                         | chr6  | 261294373 | 261393444 | 96           | 0.034    | 1        | 1         | 5.628E-04 | 4.502E-03 | PB-GT      |
| PRKDC     | protein kinase co-transcriptional homolog (basophil) [Source:HGNC Symbol;Acc:9457]                            | chr2  | 37620111  | 376337283 | 87           | 0.034    | 1        | 1         | 5.656E-04 | 4.604E-03 | PB-GT      |
| LINC02077 | long intergenic non-protein coding RNA 277 [Source:HGNC Symbol;Acc:26596]                                     | chr15 | 69365266  | 69388160  | 93           | 0.034    | 1        | 1         | 5.713E-04 | 4.633E-03 | PB-GT      |
| ZNF811    | zinc finger, RAN-binding domain containing 1 [Source:HGNC Symbol;Acc:18224]                                   | chr10 | 126630692 | 126676758 | 366          | 1.058    | 2        | 2         | 5.801E-04 | 4.678E-03 | PB-GT      |
| C15orf80  | C15orf80 15 open reading frame 80 [Source:HGNC Symbol;Acc:26523]                                              | chr15 | 85147496  | 85164366  | 60           | 0.034    | 1        | 1         | 5.811E-04 | 4.678E-03 | PB-GT      |
| C12orf2   | calcium and integrin binding family member 2 [Source:HGNC Symbol;Acc:24578]                                   | chr12 | 78396468  | 78423886  | 94           | 0.038    | 1        | 1         | 5.835E-04 | 4.675E-03 | PB-GT      |
| TUBA4A    | tubulin, alpha 4a [Source:HGNC Symbol;Acc:12407]                                                              | chr2  | 220114433 | 220142892 | 94           | 0.035    | 1        | 1         | 5.866E-04 | 4.675E-03 | PB-GT      |
| FAM122B   | family with sequence similarity 122B [Source:HGNC Symbol;Acc:34040]                                           | chr4  | 133903596 | 13391262  | 208          | 0.035    | 1        | 1         | 5.866E-04 | 4.675E-03 | PB-GT      |
| AGA       | asparaglycosaminidase [Source:HGNC Symbol;Acc:318]                                                            | chr4  | 178351924 | 178383657 | 106          | 0.035    | 1        | 1         | 5.871E-04 | 4.675E-03 | PB-GT      |
| ZNF783    | zinc finger family member 783 [Source:HGNC Symbol;Acc:27222]                                                  | chr7  | 148952602 | 148994393 | 104          | 0.035    | 1        | 1         | 5.902E-04 | 4.675E-03 | PB-GT      |
| DWTF1     | cyclin D binding myo-like transcription factor 1 [Source:HGNC Symbol;Acc:14603]                               | chr7  | 87871677  | 88265653  | 475          | 0.159    | 2        | 2         | 5.922E-04 | 4.675E-03 | PB-GT      |
| SLC30A10  | solute carrier family 30, member 10 [Source:HGNC Symbol;Acc:25355]                                            | chr1  | 219888769 | 220131989 | 1856         | 0.658    | 4        | 4         | 5.949E-04 | 4.675E-03 | PB-GT      |
| ZNF889    | zinc finger protein 889 [Source:HGNC Symbol;Acc:25173]                                                        | chr16 | 30613879  | 30635333  | 81           | 0.035    | 1        | 1         | 5.955E-04 | 4.675E-03 | PB-GT      |
| MPF2      | myosin protein zero-like 2 [Source:HGNC Symbol;Acc:3496]                                                      | chr11 | 118104118 | 118132621 | 96           | 0.035    | 1        | 1         | 5.955E-04 | 4.675E-03 | PB-GT      |
| CUEDC1    | CUE domain containing 1 [Source:HGNC Symbol;Acc:31350]                                                        | chr17 | 55938804  | 56032884  | 301          | 0.160    | 2        | 2         | 6.004E-04 | 4.688E-03 | PB-GT      |
| ADAM17    | ADAM metalloproteinase domain 17 [Source:HGNC Symbol;Acc:195]                                                 | chr2  | 9628915   | 9699221   | 433          | 0.160    | 2        | 2         | 6.016E-04 | 4.688E-03 | PB-GT      |
| POE3A     | phosphotriesterase 3A [Source:HGNC Symbol;Acc:3763]                                                           | chr5  | 85523071  | 85962376  | 1017         | 0.374    | 3        | 3         | 6.045E-04 | 4.700E-03 | PB-GT      |
| MALAT1    | metastasis associated lung adenocarcinoma transcript 1 (non-protein coding) [Source:HGNC Symbol;Acc:23665]    | chr11 | 65265233  | 65273940  | 97           | 0.035    | 1        | 1         | 6.086E-04 | 4.715E-03 | PB-GT      |
| COM1      | complexin 1 [Source:HGNC Symbol;Acc:2309]                                                                     | chr2  | 7745      | 819986    | 108          | 0.035    | 1        | 1         | 6.113E-04 | 4.721E-03 | PB-GT      |
| LRIF1P1   | leucine rich repeat (in FHL) interacting protein 1 [Source:HGNC Symbol;Acc:6702]                              | chr2  | 238536219 | 23872325  | 1018         | 0.375    | 3        | 3         | 6.132E-04 | 4.722E-03 | PB-GT      |
| CTSB      | cathepsin B [Source:HGNC Symbol;Acc:2527]                                                                     | chr8  | 11700033  | 11726957  | 92           | 0.036    | 1        | 1         | 6.320E-04 | 4.839E-03 | PB-GT      |
| TC1       | TC1 [Source:HGNC Symbol;Acc:11855]                                                                            | chr1  | 116591016 | 117054225 | 83           | 0.037    | 1        | 1         | 6.547E-04 | 4.956E-03 | PB-GT      |
| ZNF274    | zinc finger protein 274 [Source:HGNC Symbol;Acc:13068]                                                        | chr19 | 58994396  | 58724928  | 105          | 0.036    | 1        | 1         | 6.358E-04 | 4.839E-03 | PB-GT      |
| ZFP28     | ZFP28 zinc finger protein [Source:HGNC Symbol;Acc:17801]                                                      | chr19 | 57050317  | 57066189  | 105          | 0.036    | 1        | 1         | 6.358E-04 | 4.839E-03 | PB-GT      |
| MAP1LC2B2 | microtubule-associated protein 1 light chain 3 beta 2 [Source:HGNC Symbol;Acc:34390]                          | chr1  | 116591016 | 117054225 | 83           | 0.037    | 1        | 1         | 6.547E-04 | 4.956E-03 | PB-GT      |
| SLC35E4   | solute carrier family 35, member 4E [Source:HGNC Symbol;Acc:17058]                                            | chr22 | 31031639  | 31065003  | 87           | 0.037    | 1        | 1         | 6.583E-04 | 4.981E-03 | PB-GT      |
| CDC19     | coiled-coil domain containing 19 [Source:HGNC Symbol;Acc:17229]                                               | chr1  | 159842154 | 159899503 | 104          | 0.037    | 1        | 1         | 6.624E-04 | 4.983E-03 | PB-GT      |
| CJAD      | gap junction protein, alpha 9, SRA26 [Source:HGNC Symbol;Acc:19155]                                           | chr3  | 93330175  | 93342068  | 104          | 0.037    | 1        | 1         | 6.624E-04 | 4.983E-03 | PB-GT      |
| TGF3      | transforming growth factor, beta 3 [Source:HGNC Symbol;Acc:11769]                                             | chr14 | 76424442  | 76449334  | 103          | 0.037    | 1        | 1         | 6.663E-04 | 4.988E-03 | PB-GT      |
| TCTE3     | T-complex associated testis-expressed 3 [Source:HGNC Symbol;Acc:11695]                                        | chr6  | 170140210 | 170151655 | 105          | 0.037    | 1        | 1         | 6.718E-04 | 5.022E-03 | PB-GT      |
| TBC1D10A  | TBC1 domain family, member 10A [Source:HGNC Symbol;Acc:19650]                                                 | chr2  | 94987979  | 94987979  | 86           | 0.037    | 1        | 1         | 6.733E-04 | 5.022E-03 | PB-GT      |
| CHST10    | carbohydrate sulfotransferase 10 [Source:HGNC Symbol;Acc:19650]                                               | chr2  | 101008327 | 101034118 | 102          | 0.038    | 1        | 1         | 6.894E-04 | 5.117E-03 | PB-GT      |
| MED31     | mediator complex subunit 31 [Source:HGNC Symbol;Acc:24260]                                                    | chr17 | 6546835   | 6549494   | 71           | 0.038    | 1        | 1         | 6.903E-04 | 5.117E-03 | PB-GT      |
| MGAR9     | mitogen-activated protein kinase domain containing 9 [Source:HGNC Symbol;Acc:29069]                           | chr16 | 140191717 | 140219492 | 115          | 0.041    | 1        | 1         | 6.920E-04 | 5.117E-03 | PB-GT      |
| ZNF317    | zinc finger protein 317 [Source:HGNC Symbol;Acc:13507]                                                        | chr19 | 9251056   | 9274100   | 110          | 0.038    | 1        | 1         | 6.970E-04 | 5.139E-03 | PB-GT      |
| EML2      | echinoderm microtubule associated protein like 2 [Source:HGNC Symbol;Acc:18035]                               | chr19 | 46110222  | 46148887  | 111          | 0.038    | 1        | 1         | 7.095E-04 | 5.200E-03 | PB-GT      |
| UBI2Z     | ubiquitin-conjugating enzyme E2Z [Source:HGNC Symbol;Acc:25847]                                               | chr1  | 49867311  | 49868711  | 110          | 0.038    | 1        | 1         | 7.096E-04 | 5.200E-03 | PB-GT      |
| CC18      | chaperonin containing TCP1, subunit 8 (theta) [Source:HGNC Symbol;Acc:1623]                                   | chr21 | 30428126  | 30446118  | 151          | 0.038    | 1        | 1         | 7.111E-04 | 5.200E-03 | PB-GT      |
| SULT1C2   | sulfotransferase family, cytosolic, 1C, member 2 [Source:HGNC Symbol;Acc:11456]                               | chr2  | 108950009 | 109026371 | 104          | 0.038    | 1        | 1         | 7.163E-04 | 5.222E-03 | PB-GT      |
| ACT18     | ACT18 actin-related protein 8 homolog (yeast) [Source:HGNC Symbol;Acc:14672]                                  | chr2  | 639019672 | 63916298  | 118          | 0.039    | 1        | 1         | 7.163E-04 | 5.222E-03 | PB-GT      |
| FMOBP     | flavin containing monooxygenase B pseudogene [Source:HGNC Symbol;Acc:32209]                                   | chr1  | 166535415 | 166549942 | 110          | 0.039    | 1        | 1         | 7.400E-04 | 5.365E-03 | PB-GT      |
| ATGB4     | autophagy related 4B, cysteine peptidase [Source:HGNC Symbol;Acc:20790]                                       | chr2  | 242576028 | 242610072 | 107          | 0.039    | 1        | 1         | 7.577E-04 | 5.476E-03 | PB-GT      |
| TSC2D2    | TSC2 domain family, member 3 [Source:HGNC Symbol;Acc:30561]                                                   | chrX  | 106959641 | 107026272 | 237          | 0.039    | 1        | 1         | 7.594E-04 | 5.476E-03 | PB-GT      |
| MYCB      | c-myc binding protein [Source:HGNC Symbol;Acc:754]                                                            | chr1  | 39328636  | 39347289  | 112          | 0.040    | 1        | 1         | 7.668E-04 | 5.510E-03 | PB-GT      |
| HOXA-AS3  | HOXA cluster antisense RNA 3 [Source:HGNC Symbol;Acc:43745]                                                   | chr7  | 27417396  | 27420241  | 118          | 0.040    | 1        | 1         | 7.702E-04 | 5.510E-03 | PB-GT      |
| IGSF3     | immunoglobulin superfamily, member 3 [Source:HGNC Symbol;Acc:5950]                                            | chr1  | 117117031 | 11721035  | 491          | 0.174    | 2        | 2         | 7.705E-04 | 5.510E-03 | PB-GT      |
| LPCAT1    | lysophosphatidylcholine acyltransferase 1 [Source:HGNC Symbol;Acc:25718]                                      | chr5  | 1456956   | 1524092   | 123          | 0.040    | 1        | 1         | 7.852E-04 | 5.600E-03 | PB-GT      |
| GPC5-AS1  | GPC5 antisense RNA 1 [Source:HGNC Symbol;Acc:39868]                                                           | chr13 | 93352642  | 93358867  | 167          | 0.040    | 1        | 1         | 7.852E-04 | 5.600E-03 | PB-GT      |
| LZIC      | lysin zipper and CTNBP1 domain containing [Source:HGNC Symbol;Acc:17497]                                      | chr1  | 9982173   | 10033465  | 114          | 0.040    | 1        | 1         | 7.940E-04 | 5.632E-03 | PB-GT      |
| CAPN1     | catpain 1, (mu)1 large subunit [Source:HGNC Symbol;Acc:1476]                                                  | chr11 | 64948037  | 64979477  | 112          | 0.041    | 1        | 1         | 8.084E-04 | 5.718E-03 | PB-GT      |
| IAT1      | inhibitor of activator-1 hydroxylase 1 homolog (S. cerevisiae) [Source:HGNC Symbol;Acc:27969]                 | chr2  | 96157373  | 96193672  | 112          | 0.041    | 1        | 1         | 8.084E-04 | 5.718E-03 | PB-GT      |
| TMEM8     | transmembrane protein 8B [Source:HGNC Symbol;Acc:21427]                                                       | chr1  | 39814448  | 39854844  | 126          | 0.041    | 1        | 1         | 8.295E-04 | 5.835E-03 | PB-GT      |
| EMP1      | epithelial membrane protein 1 [Source:HGNC Symbol;Acc:3333]                                                   | chr12 | 13349650  | 13369708  | 94           | 0.041    | 1        | 1         | 8.370E-04 | 5.873E-03 | PB-GT      |
| CGP1      | carboxyl-terminal glycoprotein 1 [Source:HGNC Symbol;Acc:4249]                                                | chr1  | 25409665  | 25497847  | 118          | 0.041    | 1        | 1         | 8.495E-04 | 5.947E-03 | PB-GT      |
| KREMEN1   | kringle containing transmembrane protein 1 [Source:HGNC Symbol;Acc:17550]                                     | chr22 | 29496066  | 29564321  | 428          | 0.181    | 2        | 2         | 8.593E-04 | 5.953E-03 | PB-GT      |
| VIPR1     | vasoactive intestinal peptide receptor 1 [Source:HGNC Symbol;Acc:12694]                                       | chr3  | 42530791  | 42579059  | 128          | 0.042    | 1        | 1         | 8.594E-04 | 5.953E-03 | PB-GT      |
| C11orf85  | C11orf85 11 open reading frame 85 [Source:HGNC Symbol;Acc:26519]                                              | chr1  | 93317046  | 93326258  | 130          | 0.042    | 1        | 1         | 8.621E-04 | 5.953E-03 | PB-GT      |
| CHST12    | carbohydrate (chondroitin 4) sulfotransferase 12 [Source:HGNC Symbol;Acc:17423]                               | chr7  | 2443223   | 2474422   | 126          | 0.042    | 1        | 1         | 8.621E-04 | 5.953E-03 | PB-GT      |
| CP4A      | carboxypeptidase A4 [Source:HGNC Symbol;Acc:15740]                                                            | chr7  | 129932974 | 129964020 | 126          | 0.042    | 1        | 1         | 8.621E-04 | 5.953E-03 | PB-GT      |
| DDIT1     | DDIT1 (Asp-Glu-His-Leu) box helix 1 [Source:HGNC Symbol;Acc:2736]                                             | chr2  | 11228772  | 11230736  | 86           | 0.042    | 1        | 1         | 8.752E-04 | 6.012E-03 | PB-GT      |
| SLC1A3    | solute carrier family 1 (galial high affinity glutamate transporter), member 3 [Source:HGNC Symbol;Acc:10941] | chr5  | 36606457  | 36688436  | 557          | 0.182    | 2        | 2         | 8.753E-04 | 6.012E-03 | PB-GT      |
| THSD4     | thrombospondin type 1 domain containing 4 [Source:HGNC Symbol;Acc:25635]                                      | chr15 | 17389291  | 17407722  | 4043         | 1.486    | 6        | 6         | 8.785E-04 | 6.020E-03 | PB-GT      |
| SNRN200   | small nuclear ribonucleoprotein 200A (L) [Source:HGNC Symbol;Acc:30859]                                       | chr2  | 89400714  | 89407291  | 118          | 0.042    | 1        | 1         | 8.865E-04 | 6.020E-03 | PB-GT      |
| NOSTRIN   | nitric oxide synthase trafficker [Source:HGNC Symbol;Acc:20203]                                               | chr2  | 169643049 | 169722024 | 497          | 0.183    | 2        | 2         | 8.938E-04 | 6.091E-03 | PB-GT      |
| HGS12     | regulator of G-protein signaling 12 [Source:HGNC Symbol;Acc:9994]                                             | chr4  | 3294765   | 3441640   | 961          | 0.184    | 2        | 2         | 9.018E-04 | 6.126E-03 | PB-GT      |
| ZNF67     | zinc finger protein 67 [Source:HGNC Symbol;Acc:17023]                                                         | chr19 | 8171619   | 8171619   | 126          | 0.042    | 1        | 1         | 9.111E-04 | 6.126E-03 | PB-GT      |
| RNF139    | ring finger protein 139 [Source:HGNC Symbol;Acc:17023]                                                        | chr8  | 125486979 | 125500155 | 111          | 0.043    | 1        | 1         | 9.155E-04 | 6.186E-03 | PB-GT      |
| SUN1      | SUN1 and UNC54 domain containing 2 [Source:HGNC Symbol;Acc:14210]                                             | chr22 | 39130730  | 39180148  | 138          | 0.043    | 1        | 1         | 9.155E-04 | 6.186E-03 | PB-GT      |
| SERPINA3  | serpin peptidase inhibitor, clade B (ovalbumin), member 13 [Source:HGNC Symbol;Acc:8944]                      | chr18 | 11254223  | 11271873  | 136          | 0.044    | 1        | 1         | 9.198E-04 | 6.186E-03 | PB-GT      |
| COMMD6    | COMMD domain containing 6 [Source:HGNC Symbol;Acc:24015]                                                      | chr13 | 76099350  | 76123875  | 181          | 0.044    | 1        | 1         | 9.275E-04 | 6.222E-03 | PB-GT      |
| LINC0246  | long intergenic non-protein coding RNA 426 [Source:HGNC Symbol;Acc:42761]                                     | chr2  | 25914007  | 25919263  | 102          | 0.044    | 1        | 1         | 9.478E-04 | 6.222E-03 | PB-GT      |
| SPIN2     | serpin peptidase inhibitor, Kunitz type 2 [Source:HGNC Symbol;Acc:11247]                                      | chr19 | 38734675  | 38783254  | 129          | 0.044    | 1        | 1         | 9.544E-04 | 6.370E-03 | PB-GT      |
| COL18A1   | collagen, type XVIII, alpha 1 [Source:HGNC Symbol;Acc:2195]                                                   | chr21 | 46825052  | 46938354  | 129          | 0.044    | 1        | 1         | 9.729E-04 | 6.477E-03 | PB-GT      |
| NR1A      | NR1A retinoid receptor subunit 1 [Source:HGNC Symbol;Acc:2809]                                                | chr2  | 14548316  | 14558423  | 125          | 0.045    | 1        | 1         | 9.752E-04 | 6.477E-03 | PB-GT      |
| LINC0042  | long intergenic non-protein coding RNA 422 [Source:HGNC Symbol;Acc:42757]                                     | chr3  | 21877651  | 21922860  | 186          | 0.045    | 1        | 1         | 9.787E-04 | 6.482E-03 | PB-GT      |
| CN14      | cornichon homolog 4 (Drosophila) [Source:HGNC Symbol;Acc:25013]                                               | chr1  | 224544552 | 224567161 | 127          | 0.045    | 1        | 1         | 9.824E-04 | 6.490E-03 | PB-GT      |
| CDKN2C    | CDC2 dependent kinase inhibitor 2C (p18, inhibits CDK4) [Source:HGNC Symbol;Acc:1789]                         | chr12 | 11425417  | 11440298  | 118          | 0.045    | 1        | 1         | 9.877E-04 | 6.523E-03 | PB-GT      |
| HNRNP3A3  | heterogeneous nuclear ribonucleoprotein A3 [Source:HGNC Symbol;Acc:24941]                                     | chr2  | 17807721  | 17808866  | 124          | 0.046    | 1        | 1         | 1.010E-03 |           |            |

**Table S1. Genes with significant transposon integrations in DLD-1 KRAS<sup>G12V</sup> cells after selection in low glucose medium.**

| Gene ID     | Description                                                                                                                                                    | Chrom | Start     | End       | # TTAAs sites | Expected | Observed | Libraries | P         | FDR       | Transposon |
|-------------|----------------------------------------------------------------------------------------------------------------------------------------------------------------|-------|-----------|-----------|---------------|----------|----------|-----------|-----------|-----------|------------|
| HOXC6       | homeobox C6 [Source:HGNC Symbol;Acc:1528]                                                                                                                      | chr12 | 54384408  | 54424607  | 129           | 0.057    | 1        | 1         | 1.950E-03 | 8.497E-03 | PB-GT      |
| PTEN        | phosphatase and tensin homologue [Source:HGNC Symbol;Acc:9588]                                                                                                 | chr10 | 69622870  | 69706233  | 486           | 1.28     | 3        | 2         | 1.776E-03 | 8.526E-03 | PB-GT      |
| PRKCH       | protein kinase C, eta [Source:HGNC Symbol;Acc:9403]                                                                                                            | chr14 | 61654277  | 62017694  | 2288          | 0.821    | 4        | 1         | 1.579E-03 | 8.526E-03 | PB-GT      |
| MK167       | antigen identified by monoclonal antibody K6-47 [Source:HGNC Symbol;Acc:7107]                                                                                  | chr10 | 129894923 | 129924649 | 133           | 0.057    | 1        | 1         | 1.579E-03 | 8.526E-03 | PB-GT      |
| SPFR1       | SPFR1 homolog 1 [Source:HGNC Symbol;Acc:30922]                                                                                                                 | chr18 | 12446511  | 12446511  | 1520          | 0.821    | 2        | 1         | 1.585E-03 | 8.526E-03 | PB-GT      |
| C1orf198    | chromosome 1 open reading frame 198 [Source:HGNC Symbol;Acc:25900]                                                                                             | chr1  | 230572865 | 231003535 | 162           | 0.057    | 1        | 1         | 1.585E-03 | 8.526E-03 | PB-GT      |
| RUNX3       | runx-related transcription factor 3 [Source:HGNC Symbol;Acc:10473]                                                                                             | chr1  | 25222002  | 25291612  | 162           | 0.057    | 1        | 1         | 1.585E-03 | 8.526E-03 | PB-GT      |
| TBCD21      | TBC domain containing 1 [Source:HGNC Symbol;Acc:25646]                                                                                                         | chr18 | 189203862 | 189293332 | 176           | 0.058    | 1        | 1         | 1.606E-03 | 8.513E-03 | PB-GT      |
| ITFG2       | integrin alpha FG-GAP repeat containing 2 [Source:HGNC Symbol;Acc:30879]                                                                                       | chr12 | 2921788   | 2968957   | 131           | 0.058    | 1        | 1         | 1.608E-03 | 8.513E-03 | PB-GT      |
| ERC1C1      | excision repair cross-complementing rodent repair deficiency, complementation group 1 (includes overlapping antisense sequence) [Source:HGNC Symbol;Acc:25646] | chr19 | 45910591  | 45982096  | 169           | 0.058    | 1        | 1         | 1.623E-03 | 8.513E-03 | PB-GT      |
| THLMD3      | THLMD3 domain containing 3 [Source:HGNC Symbol;Acc:44638]                                                                                                      | chr3  | 3044526   | 3049474   | 177           | 0.058    | 1        | 1         | 1.626E-03 | 8.513E-03 | PB-GT      |
| ZBED4       | zinc finger, BED-type containing 4 [Source:HGNC Symbol;Acc:20721]                                                                                              | chr12 | 50247490  | 50282090  | 138           | 0.058    | 1        | 1         | 1.633E-03 | 8.690E-03 | PB-GT      |
| NFSR1       | neuropilin 5 receptor 1 [Source:HGNC Symbol;Acc:23631]                                                                                                         | chr7  | 34897851  | 34917944  | 1468          | 0.491    | 3        | 2         | 1.636E-03 | 8.690E-03 | PB-GT      |
| NKAN1       | Nankk1 transporting ATPase interacting 1 [Source:HGNC Symbol;Acc:25743]                                                                                        | chr1  | 31652592  | 31712401  | 165           | 0.058    | 1        | 1         | 1.644E-03 | 8.713E-03 | PB-GT      |
| NAAA        | N-acetylglucosaminidase [Source:HGNC Symbol;Acc:738]                                                                                                           | chr4  | 78831809  | 78882204  | 179           | 0.059    | 1        | 1         | 1.653E-03 | 8.748E-03 | PB-GT      |
| TMEM207     | transmembrane protein 207 [Source:HGNC Symbol;Acc:33705]                                                                                                       | chr3  | 19014644  | 19017865  | 179           | 0.059    | 1        | 1         | 1.662E-03 | 8.772E-03 | PB-GT      |
| C1orf166    | chromosome 14 open reading frame 166 [Source:HGNC Symbol;Acc:23169]                                                                                            | chr14 | 5245193   | 5247420   | 164           | 0.059    | 1        | 1         | 1.665E-03 | 8.772E-03 | PB-GT      |
| PVT1        | PVT1 oncogene (non-protein coding) [Source:HGNC Symbol;Acc:9709]                                                                                               | chr8  | 128890779 | 129113499 | 1263          | 0.494    | 3        | 2         | 1.677E-03 | 8.816E-03 | PB-GT      |
| GPT2        | glutamine-fructose-6-phosphate transaminase 2 [Source:HGNC Symbol;Acc:4242]                                                                                    | chr5  | 173727690 | 173783387 | 182           | 0.059    | 1        | 1         | 1.697E-03 | 8.808E-03 | PB-GT      |
| FANCD2P2    | FancD1 antisense, complementation group D2 pseudogene 2 [Source:HGNC Symbol;Acc:44488]                                                                         | chr3  | 11901148  | 11932646  | 181           | 0.059    | 1        | 1         | 1.699E-03 | 8.888E-03 | PB-GT      |
| SMPX        | small muscle protein, X-linked [Source:HGNC Symbol;Acc:11122]                                                                                                  | chrX  | 21724090  | 21778281  | 367           | 0.059    | 1        | 1         | 1.700E-03 | 8.888E-03 | PB-GT      |
| PKM1        | pyruvate kinase, muscle [Source:HGNC Symbol;Acc:9021]                                                                                                          | chr7  | 72991370  | 72998164  | 162           | 0.060    | 1        | 1         | 1.705E-03 | 8.920E-03 | PB-GT      |
| EIF2S2      | eukaryotic translation initiation factor 2, subunit 2 beta, 38kDa [Source:HGNC Symbol;Acc:3266]                                                                | chr10 | 32676104  | 32701338  | 161           | 0.060    | 1        | 1         | 1.721E-03 | 8.959E-03 | PB-GT      |
| GALNT6      | UDP-N-acetyl-alpha-D-galactosamine polypeptide N-acetylglucosaminyltransferase 6 (GalNAc-T6) [Source:HGNC Symbol;Acc:4128]                                     | chr12 | 51745031  | 51786651  | 136           | 0.060    | 1        | 1         | 1.731E-03 | 8.992E-03 | PB-GT      |
| GEHML1      | germline associated protein 1 [Source:HGNC Symbol;Acc:20044]                                                                                                   | chr2  | 30397676  | 30399599  | 164           | 0.060    | 1        | 1         | 1.755E-03 | 9.055E-03 | PB-GT      |
| CD24E3P3    | CD24E2 effector protein (Rho GTPase binding) 3 [Source:HGNC Symbol;Acc:16943]                                                                                  | chr6  | 37869032  | 37965611  | 630           | 0.232    | 2        | 2         | 1.756E-03 | 9.055E-03 | PB-GT      |
| GT2H5       | general transcription factor IIB, polycomb 5 [Source:HGNC Symbol;Acc:21157]                                                                                    | chr12 | 158589884 | 158615020 | 127           | 0.061    | 1        | 1         | 1.775E-03 | 9.154E-03 | PB-GT      |
| MDH1B       | malic dehydrogenase 1B, NAD (oxidase) [Source:HGNC Symbol;Acc:17836]                                                                                           | chr2  | 307820407 | 307832931 | 165           | 0.061    | 1        | 1         | 1.776E-03 | 9.154E-03 | PB-GT      |
| UOCC        | ubiquitin-cytochrome c reductase complex chaperone [Source:HGNC Symbol;Acc:15891]                                                                              | chr20 | 33809369  | 33999944  | 628           | 0.233    | 2        | 2         | 1.781E-03 | 9.154E-03 | PB-GT      |
| YBK1        | Y-box binding protein 1 [Source:HGNC Symbol;Acc:8014]                                                                                                          | chr1  | 43148089  | 43188020  | 122           | 0.061    | 1        | 1         | 1.783E-03 | 9.154E-03 | PB-GT      |
| TMEM64      | transmembrane protein 64 [Source:HGNC Symbol;Acc:25441]                                                                                                        | chr2  | 16342223  | 16349620  | 129           | 0.061    | 1        | 1         | 1.815E-03 | 9.282E-03 | PB-GT      |
| LYPD1       | LYPD1/PLAUR domain containing 1 [Source:HGNC Symbol;Acc:28431]                                                                                                 | chr2  | 133402426 | 133429152 | 168           | 0.062    | 1        | 1         | 1.840E-03 | 9.410E-03 | PB-GT      |
| NNMAT1      | nicotinamide nucleoside adenyltransferase 1 [Source:HGNC Symbol;Acc:17877]                                                                                     | chr1  | 10033486  | 10045599  | 175           | 0.062    | 1        | 1         | 1.844E-03 | 9.410E-03 | PB-GT      |
| MPHOSPH8    | microtubule phosphatase 8 [Source:HGNC Symbol;Acc:25441]                                                                                                       | chr5  | 10001788  | 10001788  | 287           | 0.062    | 1        | 1         | 1.844E-03 | 9.410E-03 | PB-GT      |
| AMICA1      | adhesion molecule, interacts with CXADR antigen 1 [Source:HGNC Symbol;Acc:19084]                                                                               | chr11 | 11806445  | 11809809  | 171           | 0.062    | 1        | 1         | 1.858E-03 | 9.445E-03 | PB-GT      |
| UMODL1      | uromodulin-like 1 [Source:HGNC Symbol;Acc:12566]                                                                                                               | chr21 | 43483068  | 43563105  | 247           | 0.062    | 1        | 1         | 1.872E-03 | 9.497E-03 | PB-GT      |
| FAM148B1    | family with sequence similarity 148, member B1 [Source:HGNC Symbol;Acc:29162]                                                                                  | chr10 | 44927024  | 44937620  | 149           | 0.062    | 1        | 1         | 1.875E-03 | 9.497E-03 | PB-GT      |
| TMX2        | thioesteron-related transmembrane protein 2 [Source:HGNC Symbol;Acc:30739]                                                                                     | chr11 | 57480072  | 57508445  | 172           | 0.063    | 1        | 1         | 1.879E-03 | 9.498E-03 | PB-GT      |
| NKX5        | transcription factor 5 [Source:HGNC Symbol;Acc:12840]                                                                                                          | chr1  | 33240840  | 33283754  | 177           | 0.063    | 1        | 1         | 1.886E-03 | 9.501E-03 | PB-GT      |
| NKX2-2      | transcription factor 2, Nkx2 homeobox subfamily B, member 2 [Source:HGNC Symbol;Acc:25783]                                                                     | chr12 | 124045000 | 124045000 | 540           | 0.232    | 2        | 2         | 1.890E-03 | 9.501E-03 | PB-GT      |
| MI2         | melanoma inhibitory activity 2 [Source:HGNC Symbol;Acc:18432]                                                                                                  | chr14 | 39699435  | 39722859  | 175           | 0.063    | 1        | 1         | 1.891E-03 | 9.501E-03 | PB-GT      |
| FNAN1       | interferon alpha, beta and omega receptor 1 [Source:HGNC Symbol;Acc:5432]                                                                                      | chr3  | 34698734  | 34723000  | 163           | 0.063    | 1        | 1         | 1.902E-03 | 9.526E-03 | PB-GT      |
| ATXN10      | ataxin 10 [Source:HGNC Symbol;Acc:10548]                                                                                                                       | chr22 | 60567678  | 60424187  | 1212          | 0.812    | 3        | 1         | 1.904E-03 | 9.526E-03 | PB-GT      |
| MPAP5       | microtubule associated protein 5 [Source:HGNC Symbol;Acc:29673]                                                                                                | chr12 | 8789942   | 8815484   | 143           | 0.063    | 1        | 1         | 1.910E-03 | 9.526E-03 | PB-GT      |
| PCNKL4      | peccan-like 4 (Disopline) [Source:HGNC Symbol;Acc:20449]                                                                                                       | chr18 | 50558628  | 50558628  | 667           | 0.232    | 2        | 2         | 1.910E-03 | 9.526E-03 | PB-GT      |
| MARP1       | microtubule-associated protein, RPEB family, member 1 [Source:HGNC Symbol;Acc:6890]                                                                            | chr20 | 31407699  | 31438211  | 170           | 0.063    | 1        | 1         | 1.914E-03 | 9.526E-03 | PB-GT      |
| C1orf128    | chromosome 10 open reading frame 128 [Source:HGNC Symbol;Acc:27274]                                                                                            | chr10 | 50362773  | 50396860  | 148           | 0.064    | 1        | 1         | 1.947E-03 | 9.671E-03 | PB-GT      |
| FAM122C     | family with sequence similarity 122, member C [Source:HGNC Symbol;Acc:25022]                                                                                   | chrX  | 33938019  | 33976230  | 160           | 0.064    | 1        | 1         | 1.947E-03 | 9.671E-03 | PB-GT      |
| ZNF627      | zinc finger protein 627 [Source:HGNC Symbol;Acc:30570]                                                                                                         | chr19 | 11671809  | 11729590  | 186           | 0.064    | 1        | 1         | 1.959E-03 | 9.672E-03 | PB-GT      |
| CRISP2      | cytine-rich secretory protein 2 [Source:HGNC Symbol;Acc:12024]                                                                                                 | chr6  | 49660073  | 49681274  | 181           | 0.064    | 1        | 1         | 1.961E-03 | 9.672E-03 | PB-GT      |
| CC1         | chromatin containing 1, subunit 2 (beta) [Source:HGNC Symbol;Acc:1615]                                                                                         | chr12 | 69979114  | 69983350  | 145           | 0.064    | 1        | 1         | 1.962E-03 | 9.672E-03 | PB-GT      |
| RHOA        | Ras homolog family member A [Source:HGNC Symbol;Acc:607]                                                                                                       | chr3  | 49395878  | 49440431  | 195           | 0.064    | 1        | 1         | 1.966E-03 | 9.672E-03 | PB-GT      |
| CTCF        | CCCTC-binding factor (zinc finger protein-like) [Source:HGNC Symbol;Acc:16234]                                                                                 | chr20 | 56071021  | 56100708  | 173           | 0.064    | 1        | 1         | 1.981E-03 | 9.730E-03 | PB-GT      |
| TRMT10A     | trimethyltransferase 10 homolog A (S. cerevisiae) [Source:HGNC Symbol;Acc:28403]                                                                               | chr1  | 60448760  | 60448760  | 197           | 0.064    | 1        | 1         | 1.985E-03 | 9.730E-03 | PB-GT      |
| ZNF191      | zinc and ring finger 1, E3 ubiquitin protein ligase [Source:HGNC Symbol;Acc:18452]                                                                             | chr16 | 75032928  | 75144892  | 564           | 0.243    | 2        | 2         | 1.988E-03 | 9.775E-03 | PB-GT      |
| ALDH1A2     | aldehyde dehydrogenase 1 family, member A2 [Source:HGNC Symbol;Acc:15472]                                                                                      | chr15 | 58245622  | 58790065  | 3460          | 1.272    | 5        | 2         | 2.004E-03 | 9.787E-03 | PB-GT      |
| DKK3        | DKK3 homolog (Xenopus laevis) [Source:HGNC Symbol;Acc:2965]                                                                                                    | chr18 | 11984653  | 11984653  | 178           | 0.065    | 1        | 1         | 2.007E-03 | 9.787E-03 | PB-GT      |
| TGFA        | transforming growth factor, alpha [Source:HGNC Symbol;Acc:11765]                                                                                               | chr2  | 70674412  | 70781325  | 664           | 0.245    | 2        | 2         | 2.036E-03 | 9.908E-03 | PB-GT      |
| TMOC3       | transmembrane and coiled-coil domains 3 [Source:HGNC Symbol;Acc:20326]                                                                                         | chr13 | 114143310 | 114204342 | 272           | 0.066    | 1        | 1         | 2.064E-03 | 1.001E-02 | PB-GT      |
| KY          | kyriostosis peptidase [Source:HGNC Symbol;Acc:25674]                                                                                                           | chr3  | 34321980  | 34321980  | 167           | 0.066    | 1        | 1         | 2.065E-03 | 1.002E-02 | PB-GT      |
| ADAL        | adenosine deaminase-like 3 [Source:HGNC Symbol;Acc:31853]                                                                                                      | chr15 | 43622872  | 43646096  | 179           | 0.066    | 1        | 1         | 2.073E-03 | 1.002E-02 | PB-GT      |
| HOXA3       | homeobox A3 [Source:HGNC Symbol;Acc:3104]                                                                                                                      | chr2  | 27145503  | 27182200  | 197           | 0.066    | 1        | 1         | 2.075E-03 | 1.002E-02 | PB-GT      |
| CCOR1B      | chromosome 8 open reading frame 38 [Source:HGNC Symbol;Acc:21179]                                                                                              | chr8  | 14969533  | 14969533  | 185           | 0.066    | 1        | 1         | 2.080E-03 | 1.002E-02 | PB-GT      |
| PGM3        | LSMG homolog, U5 small nuclear RNA associated (S. cerevisiae) [Source:HGNC Symbol;Acc:17017]                                                                   | chr4  | 14709887  | 14711212  | 202           | 0.066    | 1        | 1         | 2.095E-03 | 1.002E-02 | PB-GT      |
| PTERG3      | pygmycat transposable element derived 3 [Source:HGNC Symbol;Acc:19400]                                                                                         | chr10 | 5072151   | 50747086  | 156           | 0.066    | 1        | 1         | 2.104E-03 | 1.011E-02 | PB-GT      |
| PTERG2      | pygmycat transposable element derived 2 [Source:HGNC Symbol;Acc:19400]                                                                                         | chr10 | 11313003  | 11313491  | 1486          | 0.246    | 2        | 2         | 2.104E-03 | 1.011E-02 | PB-GT      |
| BEND7       | BEI domain containing 7 [Source:HGNC Symbol;Acc:23514]                                                                                                         | chr10 | 13480484  | 13570974  | 578           | 0.249    | 2        | 2         | 2.135E-03 | 1.021E-02 | PB-GT      |
| TBC1D22     | TBC1 domain family, member 22 [Source:HGNC Symbol;Acc:18026]                                                                                                   | chr9  | 10096131  | 10107193  | 204           | 0.067    | 1        | 1         | 2.135E-03 | 1.021E-02 | PB-GT      |
| SEI7P       | seitin 9 [Source:HGNC Symbol;Acc:7326]                                                                                                                         | chr7  | 16767665  | 17546678  | 471           | 0.250    | 2        | 2         | 2.152E-03 | 1.023E-02 | PB-GT      |
| PSM2C       | proteasome (prosome, macropain) 26S subunit, ATPase 6 [Source:HGNC Symbol;Acc:9653]                                                                            | chr14 | 53173890  | 53195305  | 167           | 0.067    | 1        | 1         | 2.153E-03 | 1.023E-02 | PB-GT      |
| FHL1        | fetal liver LIM domain 1 [Source:HGNC Symbol;Acc:3702]                                                                                                         | chr18 | 13522959  | 13529939  | 403           | 0.067    | 1        | 1         | 2.153E-03 | 1.023E-02 | PB-GT      |
| ST8SIAA-AS1 | ST8SIAA antisense RNA 1 [Source:HGNC Symbol;Acc:48800]                                                                                                         | chr1  | 17428935  | 17455502  | 196           | 0.067    | 1        | 1         | 2.158E-03 | 1.023E-02 | PB-GT      |
| CN3         | catenin 3, acidic [Source:HGNC Symbol;Acc:2157]                                                                                                                | chr1  | 96362507  | 96392834  | 190           | 0.067    | 1        | 1         | 2.167E-03 | 1.023E-02 | PB-GT      |
| DELTU1-AS1  | DELTU1 antisense RNA 1 [Source:HGNC Symbol;Acc:39966]                                                                                                          | chr1  | 13138199  | 13138199  | 267           | 0.067    | 1        | 1         | 2.167E-03 | 1.023E-02 | PB-GT      |
| HLLA3       | HERV-H LTR-associated 3 [Source:HGNC Symbol;Acc:4906]                                                                                                          | chr1  | 78024888  | 78051122  | 191           | 0.068    | 1        | 1         | 2.189E-03 | 1.032E-02 | PB-GT      |
| ABHD2       | abhydrolase domain containing 2 [Source:HGNC Symbol;Acc:18717]                                                                                                 | chr15 | 89630690  | 89745591  | 685           | 0.252    | 2        | 2         | 2.202E-03 | 1.039E-02 | PB-GT      |
| MANPKAPK2   | manipulator of protein kinase-activated protein kinase 2 [Source:HGNC Symbol;Acc:6887]                                                                         | chr1  | 92985009  | 92987628  | 102           | 0.068    | 1        | 1         | 2.211E-03 | 1.039E-02 | PB-GT      |
| TIAM2       | T-cell lymphoma invasion and metastasis 2 [Source:HGNC Symbol;Acc:11806]                                                                                       | chr6  | 155153831 | 15557857  | 2514          | 0.889    | 4        | 2         | 2.219E-03 |           |            |

Table S1. Genes with significant transposon integrations in DLD-1 KRAS<sup>G12V</sup> cells after selection in low glucose medium.

| Gene ID     | Description                                                                                                       | Chrom | Start     | End       | # TTAAs sites | Expected | Observed | Libraries | P         | FDR       | Transposon |
|-------------|-------------------------------------------------------------------------------------------------------------------|-------|-----------|-----------|---------------|----------|----------|-----------|-----------|-----------|------------|
| ANKRD10     | ankyrin repeat domain 10 [Source:HGNC Symbol;Acc:20268]                                                           | chr13 | 115150887 | 11567416  | 336           | 0.081    | 1        | 1         | 3.118E-03 | 1.274E-02 | PB-GT      |
| TRMT44      | 2'-O-methyltransferase class 4 homolog 5 (S. cerevisiae) [Source:HGNC Symbol;Acc:26653]                           | chr4  | 19437861  | 19492528  | 248           | 0.011    | 1        | 1         | 3.127E-03 | 1.276E-02 | PB-GT      |
| TFAM18      | nuclear factor, TFAM18-induced protein 8 [Source:HGNC Symbol;Acc:12660]                                           | chr5  | 118604387 | 118730294 | 874           | 0.285    | 2        | 2         | 3.132E-03 | 1.276E-02 | PB-GT      |
| TNKK        | TRAF2 and NCK interacting kinase [Source:HGNC Symbol;Acc:30765]                                                   | chr3  | 170779128 | 171178197 | 2938          | 0.965    | 4        | 4         | 3.151E-03 | 1.282E-02 | PB-GT      |
| GOLT1B      | glucosyl transferase 1B [Source:HGNC Symbol;Acc:21372]                                                            | chr2  | 21654715  | 21671342  | 185           | 0.089    | 1        | 1         | 3.157E-03 | 1.283E-02 | PB-GT      |
| MCEP2       | methyl CpG binding protein 2 (Retz syndrome) [Source:HGNC Symbol;Acc:6990]                                        | chrX  | 153287024 | 153402578 | 491           | 0.082    | 1        | 1         | 3.169E-03 | 1.283E-02 | PB-GT      |
| NASP        | nuclear autoantigenic sperm protein (histone-binding) [Source:HGNC Symbol;Acc:7644]                               | chr1  | 46049518  | 46084566  | 231           | 0.082    | 1        | 1         | 3.172E-03 | 1.283E-02 | PB-GT      |
| SPOC2       | signal peptide complex subunit 2 homolog 5 (S. cerevisiae) [Source:HGNC Symbol;Acc:28862]                         | chr11 | 74660292  | 74690929  | 226           | 0.082    | 1        | 1         | 3.175E-03 | 1.283E-02 | PB-GT      |
| ENDOD1      | endonuclease domain containing 1 [Source:HGNC Symbol;Acc:29129]                                                   | chr11 | 94822974  | 94868809  | 226           | 0.082    | 1        | 1         | 3.202E-03 | 1.292E-02 | PB-GT      |
| FTSJ3D2     | FtsJ methyltransferase domain containing 2 [Source:HGNC Symbol;Acc:21077]                                         | chr6  | 37400959  | 37450903  | 233           | 0.082    | 1        | 1         | 3.210E-03 | 1.294E-02 | PB-GT      |
| ARHGFB18    | RhoGAP guanine nucleotide exchange factor (GEF) 18 [Source:HGNC Symbol;Acc:17090]                                 | chr19 | 74599699  | 7537963   | 240           | 0.082    | 1        | 1         | 3.221E-03 | 1.294E-02 | PB-GT      |
| TMA16       | translational machinery associated 16 homolog 5 (S. cerevisiae) [Source:HGNC Symbol;Acc:25638]                    | chr4  | 164415594 | 164441691 | 252           | 0.083    | 1        | 1         | 3.225E-03 | 1.294E-02 | PB-GT      |
| POLL3       | PDZ and LIM domain 3 [Source:HGNC Symbol;Acc:20787]                                                               | chr4  | 188422651 | 188498786 | 252           | 0.083    | 1        | 1         | 3.225E-03 | 1.294E-02 | PB-GT      |
| ATP9A       | ATPase, class II, type 9A [Source:HGNC Symbol;Acc:15940]                                                          | chr20 | 50213053  | 50285173  | 778           | 0.289    | 2        | 2         | 3.255E-03 | 1.300E-02 | PB-GT      |
| CAV1        | caveolin 1, caveolin protein, 22kDa [Source:HGNC Symbol;Acc:1527]                                                 | chr7  | 116184839 | 116201233 | 248           | 0.083    | 1        | 1         | 3.251E-03 | 1.300E-02 | PB-GT      |
| COF21       | coatomer protein complex, subunit zeta 1 [Source:HGNC Symbol;Acc:2243]                                            | chr12 | 54984986  | 54745633  | 188           | 0.083    | 1        | 1         | 3.257E-03 | 1.300E-02 | PB-GT      |
| CPN1        | carboxypeptidase Y, polypeptide 1 [Source:HGNC Symbol;Acc:2132]                                                   | chr10 | 101801950 | 101841624 | 193           | 0.083    | 1        | 1         | 3.268E-03 | 1.303E-02 | PB-GT      |
| CDSGH       | CDSGH iron sulfur domain 1 [Source:HGNC Symbol;Acc:30880]                                                         | chr4  | 160028818 | 160093496 | 194           | 0.084    | 1        | 1         | 3.301E-03 | 1.312E-02 | PB-GT      |
| LINC27      | leucine rich repeat containing 27 [Source:HGNC Symbol;Acc:29348]                                                  | chr10 | 134145814 | 134185010 | 194           | 0.084    | 1        | 1         | 3.301E-03 | 1.312E-02 | PB-GT      |
| CR2         | complement component 3 (3c)Ecten Barv virus receptor 2 [Source:HGNC Symbol;Acc:2336]                              | chr1  | 207827575 | 207683240 | 236           | 0.084    | 1        | 1         | 3.307E-03 | 1.312E-02 | PB-GT      |
| ROR1        | receptor tyrosine kinase-like orphan receptor 1 [Source:HGNC Symbol;Acc:10256]                                    | chr1  | 64239693  | 644871181 | 2759          | 0.977    | 4        | 2         | 3.326E-03 | 1.318E-02 | PB-GT      |
| NFB2        | nuclear factor of kappa light polypeptide gene enhancer in B-cells inhibitor, zeta [Source:HGNC Symbol;Acc:28985] | chr3  | 114070588 | 114107825 | 257           | 0.084    | 1        | 1         | 3.358E-03 | 1.325E-02 | PB-GT      |
| EMC3        | ER membrane protein complex subunit 3 [Source:HGNC Symbol;Acc:23999]                                              | chr3  | 10004221  | 10052800  | 256           | 0.084    | 1        | 1         | 3.343E-03 | 1.321E-02 | PB-GT      |
| HSP90A6P    | heat shock protein 90kDa alpha (cytosolic), class A member 6, pseudogene [Source:HGNC Symbol;Acc:32536]           | chr4  | 117502621 | 117528601 | 257           | 0.084    | 1        | 1         | 3.351E-03 | 1.322E-02 | PB-GT      |
| ZBTB20-AS1  | ZBTB20 zinc finger protein 20 antisense 1 [Source:HGNC Symbol;Acc:40646]                                          | chr3  | 114070588 | 114107825 | 257           | 0.084    | 1        | 1         | 3.358E-03 | 1.325E-02 | PB-GT      |
| NR1D2       | nuclear receptor subfamily 1, group D, member 2 [Source:HGNC Symbol;Acc:7963]                                     | chr3  | 23867551  | 24022109  | 257           | 0.084    | 1        | 1         | 3.369E-03 | 1.325E-02 | PB-GT      |
| CLIP2       | CAP-Gly domain containing linker protein 2 [Source:HGNC Symbol;Acc:2586]                                          | chr7  | 73703805  | 73820273  | 253           | 0.085    | 1        | 1         | 3.379E-03 | 1.325E-02 | PB-GT      |
| PVR3L3      | PVR3-like receptor-related 3 [Source:HGNC Symbol;Acc:17641]                                                       | chr3  | 10788918  | 110974401 | 1939          | 0.622    | 2        | 2         | 3.389E-03 | 1.325E-02 | PB-GT      |
| CTBP2       | C-terminal binding protein 2 [Source:HGNC Symbol;Acc:2495]                                                        | chr10 | 126676421 | 126849739 | 682           | 0.294    | 2        | 2         | 3.393E-03 | 1.328E-02 | PB-GT      |
| CD96        | CD96 molecule [Source:HGNC Symbol;Acc:1892]                                                                       | chr4  | 111260926 | 111384597 | 895           | 0.294    | 2        | 2         | 3.402E-03 | 1.330E-02 | PB-GT      |
| RHD         | Rh blood group D antigen [Source:HGNC Symbol;Acc:10009]                                                           | chr1  | 23589894  | 23590000  | 240           | 0.085    | 1        | 1         | 3.416E-03 | 1.333E-02 | PB-GT      |
| ARPC2       | actin related protein 23 complex, subunit 2, 34kDa [Source:HGNC Symbol;Acc:705]                                   | chr2  | 219081817 | 219119079 | 231           | 0.085    | 1        | 1         | 3.426E-03 | 1.335E-02 | PB-GT      |
| HSP90A1     | heat shock protein 90kDa alpha (cytosolic), class A member 1 [Source:HGNC Symbol;Acc:5253]                        | chr4  | 10247075  | 102603036 | 238           | 0.085    | 1        | 1         | 3.445E-03 | 1.340E-02 | PB-GT      |
| PKOZ1       | prokineticin domain containing 1 [Source:HGNC Symbol;Acc:3011]                                                    | chr9  | 102947903 | 102982243 | 199           | 0.085    | 1        | 1         | 3.448E-03 | 1.343E-02 | PB-GT      |
| ADRA1A      | adenoreceptor alpha 1A [Source:HGNC Symbol;Acc:277]                                                               | chr8  | 26605667  | 26724790  | 757           | 0.296    | 2        | 2         | 3.470E-03 | 1.345E-02 | PB-GT      |
| ELMSN1      | ELMSN1 and MyoSAM1-like domain containing 1 [Source:HGNC Symbol;Acc:19853]                                        | chr4  | 74181825  | 74258988  | 239           | 0.086    | 1        | 1         | 3.473E-03 | 1.345E-02 | PB-GT      |
| NLRP1       | NLR family, pyrin domain containing 1 [Source:HGNC Symbol;Acc:22945]                                              | chr1  | 92687702  | 92346116  | 261           | 0.086    | 1        | 1         | 3.489E-03 | 1.349E-02 | PB-GT      |
| ERP27       | endoplasmic reticulum protein 27 [Source:HGNC Symbol;Acc:28495]                                                   | chr12 | 15066969  | 15092018  | 195           | 0.086    | 1        | 1         | 3.497E-03 | 1.351E-02 | PB-GT      |
| ACOX3       | acyl-CoA oxidase 3, pristanoyl [Source:HGNC Symbol;Acc:121]                                                       | chr4  | 83692009  | 8442040   | 263           | 0.086    | 1        | 1         | 3.505E-03 | 1.351E-02 | PB-GT      |
| RAS3        | RAS G1 protein activator 3 [Source:HGNC Symbol;Acc:20331]                                                         | chr13 | 147471784 | 147488989 | 357           | 0.086    | 1        | 1         | 3.509E-03 | 1.351E-02 | PB-GT      |
| TMEM53      | transmembrane protein 53 [Source:HGNC Symbol;Acc:25541]                                                           | chr4  | 41937137  | 41962589  | 264           | 0.086    | 1        | 1         | 3.531E-03 | 1.356E-02 | PB-GT      |
| TCTN1       | transcendental family member 1 [Source:HGNC Symbol;Acc:1132]                                                      | chr12 | 110518322 | 110582923 | 263           | 0.086    | 1        | 1         | 3.532E-03 | 1.356E-02 | PB-GT      |
| MKKS        | MKKS-Kaulman syndrome [Source:HGNC Symbol;Acc:1108]                                                               | chr20 | 10386832  | 10414870  | 233           | 0.087    | 1        | 1         | 3.541E-03 | 1.356E-02 | PB-GT      |
| ANGPTL5     | angiopoietin-like 5 [Source:HGNC Symbol;Acc:19705]                                                                | chr11 | 101781405 | 101787253 | 238           | 0.087    | 1        | 1         | 3.541E-03 | 1.356E-02 | PB-GT      |
| TM6SF       | transmembrane 6 superfamily member [Source:HGNC Symbol;Acc:11660]                                                 | chr15 | 63731659  | 63891369  | 237           | 0.087    | 1        | 1         | 3.549E-03 | 1.356E-02 | PB-GT      |
| SLC25A33    | solute carrier family 25 (pyrimidine nucleotide carrier), member 33 [Source:HGNC Symbol;Acc:29811]                | chr1  | 9659441   | 9642831   | 246           | 0.087    | 1        | 1         | 3.584E-03 | 1.368E-02 | PB-GT      |
| MUC13       | mucin 13, cell surface-associated [Source:HGNC Symbol;Acc:7511]                                                   | chr3  | 124624289 | 124672663 | 266           | 0.087    | 1        | 1         | 3.602E-03 | 1.373E-02 | PB-GT      |
| B4GALT1     | beta-4-galactosyltransferase 1 [Source:HGNC Symbol;Acc:924]                                                       | chr9  | 31034080  | 31046754  | 268           | 0.087    | 1        | 1         | 3.610E-03 | 1.373E-02 | PB-GT      |
| FANF1       | FANCD2/FANCI-associated nuclease 1 [Source:HGNC Symbol;Acc:29170]                                                 | chr15 | 31196055  | 31235311  | 239           | 0.088    | 1        | 1         | 3.641E-03 | 1.383E-02 | PB-GT      |
| TMCC1       | transmembrane and coiled-coil domain family 1 [Source:HGNC Symbol;Acc:29116]                                      | chr3  | 129366635 | 129812410 | 1870          | 0.614    | 3        | 2         | 3.647E-03 | 1.383E-02 | PB-GT      |
| FRBD1       | francolin domain containing 1 [Source:HGNC Symbol;Acc:31958]                                                      | chr12 | 105725440 | 105895899 | 863           | 0.287    | 2        | 2         | 3.650E-03 | 1.383E-02 | PB-GT      |
| SLC6A6      | solute carrier family 6 (neurotransmitter transporter, tauroine), member 6 [Source:HGNC Symbol;Acc:11052]         | chr3  | 14444076  | 14453087  | 268           | 0.088    | 1        | 1         | 3.654E-03 | 1.383E-02 | PB-GT      |
| LINPEP      | leucylglyoxylamidase [Source:HGNC Symbol;Acc:6656]                                                                | chr5  | 96271098  | 96373219  | 925           | 0.302    | 2        | 2         | 3.666E-03 | 1.386E-02 | PB-GT      |
| IGSF5       | immunoglobulin superfamily, member 5 [Source:HGNC Symbol;Acc:5952]                                                | chr4  | 41117334  | 41129293  | 362           | 0.088    | 1        | 1         | 3.786E-03 | 1.402E-02 | PB-GT      |
| RIFK1       | receptor (TNFRSF) interacting serine-threonine kinase 1 [Source:HGNC Symbol;Acc:10019]                            | chr6  | 3064225   | 3115421   | 925           | 0.308    | 2        | 2         | 3.793E-03 | 1.408E-02 | PB-GT      |
| AP3M1       | adaptor-related protein complex 3, mu 1 subunit [Source:HGNC Symbol;Acc:569]                                      | chr10 | 75881524  | 75910821  | 207           | 0.089    | 1        | 1         | 3.745E-03 | 1.409E-02 | PB-GT      |
| WDR76       | WD repeat domain 76 [Source:HGNC Symbol;Acc:37073]                                                                | chr15 | 44119161  | 44129161  | 263           | 0.089    | 1        | 1         | 3.761E-03 | 1.410E-02 | PB-GT      |
| NIPAL2      | NIPA-like domain containing 2 [Source:HGNC Symbol;Acc:25854]                                                      | chr8  | 99202061  | 99306821  | 781           | 0.305    | 2        | 2         | 3.784E-03 | 1.418E-02 | PB-GT      |
| KLHD04      | kelch domain containing 4 [Source:HGNC Symbol;Acc:25272]                                                          | chr16 | 87320091  | 87395998  | 208           | 0.090    | 1        | 1         | 3.787E-03 | 1.418E-02 | PB-GT      |
| AKT1        | Ras-related family leucine-rich repeat domain 1 [Source:HGNC Symbol;Acc:22231]                                    | chr12 | 271116    | 271166    | 261           | 0.090    | 1        | 1         | 3.807E-03 | 1.420E-02 | PB-GT      |
| CELFA       | CUGBP, Elav-like family member 4 [Source:HGNC Symbol;Acc:14015]                                                   | chr18 | 34823100  | 35146000  | 959           | 0.307    | 2        | 2         | 3.832E-03 | 1.431E-02 | PB-GT      |
| DDX19B      | DEAD (Asp-Glu-Ala-Asp) box polypeptide 19B [Source:HGNC Symbol;Acc:2742]                                          | chr10 | 70323586  | 70389186  | 210           | 0.091    | 1        | 1         | 3.856E-03 | 1.439E-02 | PB-GT      |
| ZNF439      | zinc finger protein 439 [Source:HGNC Symbol;Acc:22785]                                                            | chr7  | 10213426  | 10242866  | 266           | 0.091    | 1        | 1         | 3.860E-03 | 1.440E-02 | PB-GT      |
| ZNF727      | zinc finger protein 727 [Source:HGNC Symbol;Acc:22785]                                                            | chr7  | 63505821  | 63538927  | 272           | 0.091    | 1        | 1         | 3.890E-03 | 1.443E-02 | PB-GT      |
| JPH3        | junctional protein 3 [Source:HGNC Symbol;Acc:14203]                                                               | chr3  | 87635441  | 87731762  | 211           | 0.091    | 1        | 1         | 3.894E-03 | 1.443E-02 | PB-GT      |
| ACS2MA      | acyl-CoA synthetase medium chain family member 2A [Source:HGNC Symbol;Acc:32017]                                  | chr9  | 20462763  | 20468218  | 211           | 0.091    | 1        | 1         | 3.896E-03 | 1.443E-02 | PB-GT      |
| PATL1       | protein associated with topoisomerase II homolog 1 (yeast) [Source:HGNC Symbol;Acc:26711]                         | chr11 | 59040189  | 59046453  | 265           | 0.091    | 1        | 1         | 3.898E-03 | 1.443E-02 | PB-GT      |
| SLMO1       | slit modulator 1 interferer 2 [Source:HGNC Symbol;Acc:19881]                                                      | chr9  | 28417028  | 28159121  | 285           | 0.091    | 1        | 1         | 3.913E-03 | 1.444E-02 | PB-GT      |
| NXN         | nucleolin [Source:HGNC Symbol;Acc:19881]                                                                          | chr17 | 702563    | 88310     | 269           | 0.091    | 2        | 2         | 3.924E-03 | 1.446E-02 | PB-GT      |
| LINC00348   | long intergenic non-protein coding RNA 348 [Source:HGNC Symbol;Acc:42658]                                         | chr13 | 71589273  | 71742549  | 1285          | 0.310    | 2        | 2         | 3.951E-03 | 1.457E-02 | PB-GT      |
| CEP350      | centrosomal protein 350Da [Source:HGNC Symbol;Acc:11132]                                                          | chr19 | 19253698  | 19268994  | 263           | 0.092    | 1        | 1         | 3.951E-03 | 1.457E-02 | PB-GT      |
| ZBTB05      | zinc finger and BTB domain containing 5 opposite strand [Source:HGNC Symbol;Acc:24094]                            | chr1  | 33065773  | 33126544  | 261           | 0.092    | 1        | 1         | 4.021E-03 | 1.478E-02 | PB-GT      |
| ATP9V1E     | ATPase, H+ transporting, lysosomal 9kDa, V0 subunit 1E [Source:HGNC Symbol;Acc:863]                               | chr5  | 172410760 | 172484008 | 284           | 0.093    | 1        | 1         | 4.034E-03 | 1.484E-02 | PB-GT      |
| CDK22       | cyclin dependent kinase 27 [Source:HGNC Symbol;Acc:25912]                                                         | chr17 | 65195959  | 65269768  | 261           | 0.093    | 1        | 1         | 4.075E-03 | 1.485E-02 | PB-GT      |
| PPA1        | pyrophosphatase (inorganic) beta [Source:HGNC Symbol;Acc:9226]                                                    | chr10 | 71962587  | 71993667  | 216           | 0.093    | 1        | 1         | 4.067E-03 | 1.485E-02 | PB-GT      |
| PIA192A     | family with sequence similarity 192, member A [Source:HGNC Symbol;Acc:29856]                                      | chr16 | 57186378  | 57220028  | 216           | 0.093    | 1        | 1         | 4.079E-03 | 1.485E-02 | PB-GT      |
| LAMTOR5-AS1 | leucine aminotransferase RNA 5 [Source:HGNC Symbol;Acc:40523]                                                     | chr10 | 10925441  | 110474982 | 263           | 0.093    | 1        | 1         | 4.079E-03 | 1.485E-02 | PB-GT      |
| PMPCB       | peptidase (mitochondrial processing) beta [Source:HGNC Symbol;Acc:9119]                                           | chr7  | 102937880 | 1029995   |               |          |          |           |           |           |            |

table S1. Genes with significant transposon integrations in DLD-1 KRAS<sup>G12V</sup> cells after selection in low glucose medium.

| Gene ID      | Description                                                                                                                                    | Chrom | Start     | End       | # TTAAs sites | Expected | Observed | Libraries | P         | FDR       | Transposon |
|--------------|------------------------------------------------------------------------------------------------------------------------------------------------|-------|-----------|-----------|---------------|----------|----------|-----------|-----------|-----------|------------|
| SETD5-AS1    | SETD5 antisense RNA 1 [Source:HGNC Symbol;Acc:44478]                                                                                           | chr3  | 9391373   | 9440263   | 324           | 0.106    | 1        | 1         | 5.277E-03 | 1.723E-02 | PB-GT      |
| TSN2         | TSN2 intronucleic acid 2 homolog (G. cerevisiae) [Source:HGNC Symbol;Acc:28422]                                                                | chr3  | 12525931  | 15581122  | 324           | 0.106    | 1        | 1         | 5.277E-03 | 1.723E-02 | PB-GT      |
| ZNF713       | zinc finger protein 713 [Source:HGNC Symbol;Acc:22043]                                                                                         | chr7  | 5595169   | 56009918  | 319           | 0.107    | 1        | 1         | 5.295E-03 | 1.725E-02 | PB-GT      |
| SBF2-AS1     | SBF2 antisense RNA 1 [Source:HGNC Symbol;Acc:27438]                                                                                            | chr11 | 9779839   | 9832866   | 293           | 0.107    | 1        | 1         | 5.297E-03 | 1.725E-02 | PB-GT      |
| HMGCS        | HMGCS nucleosome binding domain 3 [Source:HGNC Symbol;Acc:12312]                                                                               | chr6  | 7991062   | 7994406   | 302           | 0.107    | 1        | 1         | 5.307E-03 | 1.725E-02 | PB-GT      |
| NKRAS1       | NFKB inhibitor interacting Ras-like 1 [Source:HGNC Symbol;Acc:17899]                                                                           | chr3  | 23933511  | 23988082  | 325           | 0.107    | 1        | 1         | 5.308E-03 | 1.725E-02 | PB-GT      |
| PUM1         | pumilio homolog 1 (Drosophila) [Source:HGNC Symbol;Acc:14957]                                                                                  | chr1  | 3140353   | 3153838   | 976           | 0.346    | 2        | 2         | 5.329E-03 | 1.729E-02 | PB-GT      |
| FAT1         | FAT1 tumor suppressor homolog 1 (Drosophila) [Source:HGNC Symbol;Acc:39595]                                                                    | chr4  | 97509303  | 9756776   | 1056          | 0.346    | 2        | 2         | 5.335E-03 | 1.729E-02 | PB-GT      |
| RNF175       | ring finger protein 175 [Source:HGNC Symbol;Acc:27735]                                                                                         | chr4  | 154631277 | 154681387 | 328           | 0.107    | 1        | 1         | 5.375E-03 | 1.740E-02 | PB-GT      |
| SPTAN1       | spectrin, alpha, non-erythrocytic 1 [Source:HGNC Symbol;Acc:112123]                                                                            | chr9  | 131314866 | 131393941 | 329           | 0.108    | 1        | 1         | 5.411E-03 | 1.750E-02 | PB-GT      |
| RNF214       | ring finger protein 214 [Source:HGNC Symbol;Acc:25335]                                                                                         | chr11 | 117103341 | 117167161 | 297           | 0.109    | 1        | 1         | 5.437E-03 | 1.756E-02 | PB-GT      |
| ERLEC1       | endoplasmic reticulum lectin 1 [Source:HGNC Symbol;Acc:25222]                                                                                  | chr2  | 54014181  | 5404956   | 294           | 0.108    | 1        | 1         | 5.456E-03 | 1.763E-02 | PB-GT      |
| ADNP         | activity-dependent neuroprotector homeobox [Source:HGNC Symbol;Acc:15766]                                                                      | chr20 | 4905453   | 4954768   | 293           | 0.109    | 1        | 1         | 5.517E-03 | 1.777E-02 | PB-GT      |
| LACTB2       | lactamase, beta 2 [Source:HGNC Symbol;Acc:18610]                                                                                               | chr8  | 71547653  | 71581409  | 279           | 0.109    | 1        | 1         | 5.538E-03 | 1.782E-02 | PB-GT      |
| NHS1         | NHS-like 1 [Source:HGNC Symbol;Acc:21021]                                                                                                      | chr6  | 138743180 | 139013708 | 1961          | 0.693    | 3        | 2         | 5.559E-03 | 1.786E-02 | PB-GT      |
| PRKAA1       | protein kinase, AMP-activated, alpha 1 catalytic subunit [Source:HGNC Symbol;Acc:39376]                                                        | chr5  | 40759481  | 40796474  | 335           | 0.109    | 1        | 1         | 5.564E-03 | 1.786E-02 | PB-GT      |
| GBI2         | glyoxylate binding protein 2, interferon-inducible [Source:HGNC Symbol;Acc:4153]                                                               | chr1  | 89971815  | 89981139  | 309           | 0.109    | 1        | 1         | 5.573E-03 | 1.786E-02 | PB-GT      |
| ZNF597       | zinc finger with UFM1-specific peptidase domain [Source:HGNC Symbol;Acc:21244]                                                                 | chr6  | 16998781  | 16998997  | 310           | 0.110    | 1        | 1         | 5.581E-03 | 1.787E-02 | PB-GT      |
| ACSBG1       | acyl-CoA synthetase long-chain family member 1 [Source:HGNC Symbol;Acc:29667]                                                                  | chr15 | 7945910   | 79539030  | 300           | 0.110    | 1        | 1         | 5.653E-03 | 1.808E-02 | PB-GT      |
| NFATC1       | nuclear factor of activated T-cells, cytoplasmic, calcineurin-dependent 1 [Source:HGNC Symbol;Acc:7775]                                        | chr18 | 7715856   | 77289235  | 345           | 0.110    | 1        | 1         | 5.662E-03 | 1.808E-02 | PB-GT      |
| NEGR1        | NEGR1 intronic transcrip 1 (non-protein coding) [Source:HGNC Symbol;Acc:41432]                                                                 | chr1  | 72259915  | 72302955  | 312           | 0.111    | 1        | 1         | 5.677E-03 | 1.811E-02 | PB-GT      |
| POM121       | POM121 transmembrane nucleoside [Source:HGNC Symbol;Acc:19702]                                                                                 | chr7  | 2542936   | 2542123   | 331           | 0.111    | 1        | 1         | 5.688E-03 | 1.812E-02 | PB-GT      |
| HLA-AS1      | HLA antisense RNA 1 [Source:HGNC Symbol;Acc:42506]                                                                                             | chr2  | 22106105  | 22105342  | 314           | 0.111    | 1        | 1         | 5.748E-03 | 1.829E-02 | PB-GT      |
| ST3GAL5      | ST3 beta-galactoside alpha-2,3-sialyltransferase 5 [Source:HGNC Symbol;Acc:10872]                                                              | chr10 | 89066267  | 89116137  | 302           | 0.111    | 1        | 1         | 5.755E-03 | 1.829E-02 | PB-GT      |
| ITGB1        | ITGB1 (beta-integrin receptor, beta 1) [Source:HGNC Symbol;Acc:30729]                                                                          | chr13 | 3319247   | 33294720  | 868           | 0.357    | 2        | 2         | 5.797E-03 | 1.846E-02 | PB-GT      |
| ATP7B        | ATPase, Cu <sup>+</sup> transporting, beta polypeptide [Source:HGNC Symbol;Acc:870]                                                            | chr13 | 52506809  | 52585630  | 465           | 0.112    | 1        | 1         | 5.850E-03 | 1.850E-02 | PB-GT      |
| CSPRN3       | cystine-serine-rich nuclear protein 3 [Source:HGNC Symbol;Acc:30729]                                                                           | chr2  | 166326157 | 166545917 | 1909          | 0.704    | 3        | 3         | 5.859E-03 | 1.850E-02 | PB-GT      |
| WDR67        | WD repeat domain 52 [Source:HGNC Symbol;Acc:25631]                                                                                             | chr3  | 13035777  | 13169497  | 109           | 0.358    | 2        | 2         | 5.879E-03 | 1.850E-02 | PB-GT      |
| MYO9B        | myosin IXB [Source:HGNC Symbol;Acc:7609]                                                                                                       | chr19 | 17186591  | 17235446  | 267           | 0.112    | 1        | 1         | 5.882E-03 | 1.850E-02 | PB-GT      |
| PDS1         | prenyl (decaprenyl) diphosphate synthase, subunit 1 [Source:HGNC Symbol;Acc:17599]                                                             | chr10 | 28968588  | 29035727  | 321           | 0.112    | 1        | 1         | 5.882E-03 | 1.850E-02 | PB-GT      |
| PDS3         | prenyl and SecE domain containing 2 [Source:HGNC Symbol;Acc:10903]                                                                             | chr7  | 18380931  | 18392420  | 4069          | 1.387    | 6        | 6         | 5.886E-03 | 1.850E-02 | PB-GT      |
| SORL1        | sortilin-related receptor, (LDLR class) A repeats containing [Source:HGNC Symbol;Acc:11186]                                                    | chr11 | 121322912 | 121504402 | 987           | 0.359    | 2        | 2         | 5.914E-03 | 1.862E-02 | PB-GT      |
| REPS1        | receptor accessory protein 1 [Source:HGNC Symbol;Acc:30077]                                                                                    | chr5  | 11212094  | 11225826  | 347           | 0.113    | 1        | 1         | 5.954E-03 | 1.871E-02 | PB-GT      |
| UBIQ2        | ubiquitin-conjugating enzyme E2O [Source:HGNC Symbol;Acc:29554]                                                                                | chr2  | 4386532   | 4386532   | 214           | 0.113    | 1        | 1         | 5.964E-03 | 1.871E-02 | PB-GT      |
| EBAG9        | estrogen receptor binding site associated, antigen, 9 [Source:HGNC Symbol;Acc:3123]                                                            | chr8  | 110551940 | 110578225 | 290           | 0.113    | 1        | 1         | 5.966E-03 | 1.871E-02 | PB-GT      |
| GRB10        | growth factor receptor-bound protein 10 [Source:HGNC Symbol;Acc:4564]                                                                          | chr7  | 50657760  | 50681159  | 1079          | 0.361    | 2        | 2         | 5.978E-03 | 1.872E-02 | PB-GT      |
| CLEC3A       | CLEC3A domain family 3, member A [Source:HGNC Symbol;Acc:26598]                                                                                | chr7  | 78059412  | 78103368  | 291           | 0.114    | 1        | 1         | 6.004E-03 | 1.878E-02 | PB-GT      |
| ZNF704       | zinc finger protein 704 [Source:HGNC Symbol;Acc:32291]                                                                                         | chr8  | 81540686  | 81767016  | 1816          | 0.710    | 3        | 3         | 6.040E-03 | 1.889E-02 | PB-GT      |
| GPDL1        | glycerol-3-phosphate dehydrogenase 1-like [Source:HGNC Symbol;Acc:28956]                                                                       | chr3  | 32147181  | 32210205  | 348           | 0.114    | 1        | 1         | 6.050E-03 | 1.889E-02 | PB-GT      |
| LINC025A     | lincRNA antisense to LOC100506259 [Source:HGNC Symbol;Acc:26598]                                                                               | chr15 | 32147181  | 32210205  | 311           | 0.114    | 1        | 1         | 6.050E-03 | 1.889E-02 | PB-GT      |
| LINC0256     | laminin, gamma 2 [Source:HGNC Symbol;Acc:6493]                                                                                                 | chr1  | 183155373 | 183214035 | 323           | 0.114    | 1        | 1         | 6.059E-03 | 1.890E-02 | PB-GT      |
| SH3BP2       | SH3 domain family member 2 [Source:HGNC Symbol;Acc:630]                                                                                        | chr7  | 9754466   | 9754743   | 680           | 0.231    | 1        | 1         | 6.089E-03 | 1.898E-02 | PB-GT      |
| LINC00265    | long intergenic non-protein coding RNA 265 [Source:HGNC Symbol;Acc:28019]                                                                      | chr7  | 39773231  | 39832991  | 343           | 0.115    | 1        | 1         | 6.089E-03 | 1.898E-02 | PB-GT      |
| FAM47E-1TBD1 | FAM47E-1TBD1 readthrough [Source:HGNC Symbol;Acc:44667]                                                                                        | chr4  | 77172886  | 77232752  | 350           | 0.115    | 1        | 1         | 6.091E-03 | 1.898E-02 | PB-GT      |
| RNF170       | ring finger protein 170 [Source:HGNC Symbol;Acc:32046]                                                                                         | chr15 | 42094700  | 42175433  | 394           | 0.125    | 1        | 1         | 6.125E-03 | 1.903E-02 | PB-GT      |
| SLC30A4      | solute carrier family 30 (Na <sup>+</sup> /K <sup>+</sup> transporter), member 4 [Source:HGNC Symbol;Acc:11015]                                | chr5  | 45771809  | 45819005  | 313           | 0.115    | 1        | 1         | 6.134E-03 | 1.899E-02 | PB-GT      |
| ST8SIA2      | ST8 alpha-N-acetylneuraminidase alpha-2,8-sialyltransferase 2 [Source:HGNC Symbol;Acc:10870]                                                   | chr15 | 92937058  | 93011958  | 316           | 0.116    | 1        | 1         | 6.248E-03 | 1.931E-02 | PB-GT      |
| ANKRD30B     | ankyrin domain family 30, member B [Source:HGNC Symbol;Acc:26598]                                                                              | chr17 | 14722271  | 14733462  | 1146          | 0.367    | 2        | 2         | 6.257E-03 | 1.933E-02 | PB-GT      |
| C23D3        | C2 calcium-dependent domain containing 3 [Source:HGNC Symbol;Acc:24564]                                                                        | chr11 | 73737363  | 73882255  | 1008          | 0.367    | 2        | 2         | 6.262E-03 | 1.932E-02 | PB-GT      |
| PDE6B        | phosphodiesterase 6B, cGMP-specific, rod, outer [Source:HGNC Symbol;Acc:8788]                                                                  | chr2  | 232597135 | 232659982 | 317           | 0.117    | 1        | 1         | 6.318E-03 | 1.945E-02 | PB-GT      |
| KPNA6        | karyopherin alpha 6 (importin alpha 7) [Source:HGNC Symbol;Acc:6399]                                                                           | chr1  | 42573639  | 42644169  | 330           | 0.117    | 1        | 1         | 6.325E-03 | 1.945E-02 | PB-GT      |
| MUC7         | mucin 7, secreted [Source:HGNC Symbol;Acc:7518]                                                                                                | chr4  | 71282609  | 71348714  | 357           | 0.117    | 1        | 1         | 6.328E-03 | 1.945E-02 | PB-GT      |
| DNAJC11      | DnaJ (Hsp40) homolog, subfamily C, member 11 [Source:HGNC Symbol;Acc:25570]                                                                    | chr1  | 6894226   | 6791984   | 331           | 0.117    | 1        | 1         | 6.361E-03 | 1.953E-02 | PB-GT      |
| MYO18        | myosin XVIII [Source:HGNC Symbol;Acc:28622]                                                                                                    | chr15 | 109248500 | 109243555 | 478           | 0.16     | 1        | 1         | 6.369E-03 | 1.953E-02 | PB-GT      |
| TFRC         | transferrin receptor, alpha 1 [Source:HGNC Symbol;Acc:11763]                                                                                   | chr3  | 19574054  | 19580900  | 358           | 0.118    | 1        | 1         | 6.395E-03 | 1.958E-02 | PB-GT      |
| ACTV1        | actin A receptor, type 1 [Source:HGNC Symbol;Acc:171]                                                                                          | chr2  | 18552958  | 18573274  | 1006          | 0.371    | 2        | 2         | 6.453E-03 | 1.971E-02 | PB-GT      |
| P4HA2        | prolyl 4-hydroxylase, alpha polypeptide II [Source:HGNC Symbol;Acc:8547]                                                                       | chr5  | 131527331 | 13163109  | 263           | 0.118    | 1        | 1         | 6.453E-03 | 1.971E-02 | PB-GT      |
| MAPK9        | mitogen-activated protein kinase 9 [Source:HGNC Symbol;Acc:8886]                                                                               | chr5  | 179660143 | 17971909  | 362           | 0.118    | 1        | 1         | 6.459E-03 | 1.971E-02 | PB-GT      |
| PARL         | presenilin associated, rhomboid-like [Source:HGNC Symbol;Acc:18253]                                                                            | chr3  | 16354173  | 16360271  | 363           | 0.119    | 1        | 1         | 6.568E-03 | 1.999E-02 | PB-GT      |
| RPL11        | ribosomal protein L11 [Source:HGNC Symbol;Acc:619]                                                                                             | chr17 | 67262960  | 67262960  | 225           | 0.117    | 1        | 1         | 6.574E-03 | 1.999E-02 | PB-GT      |
| NUP62CL      | nucleoporin 62kDa C-terminal like [Source:HGNC Symbol;Acc:25960]                                                                               | chrX  | 10366667  | 10446970  | 716           | 0.231    | 1        | 1         | 6.574E-03 | 1.999E-02 | PB-GT      |
| PCSK6        | proprotein convertase subtilisin/kexin type 6 [Source:HGNC Symbol;Acc:8568]                                                                    | chr15 | 101840818 | 102064065 | 1017          | 0.374    | 2        | 2         | 6.599E-03 | 2.004E-02 | PB-GT      |
| NARS         | N-acetylmethionine-sensitive factor attachment protein beta [Source:HGNC Symbol;Acc:15751]                                                     | chr2  | 43335159  | 43335159  | 322           | 0.114    | 1        | 1         | 6.603E-03 | 2.002E-02 | PB-GT      |
| ERAP1        | endoplasmic reticulum aminopeptidase 1 [Source:HGNC Symbol;Acc:18173]                                                                          | chr5  | 96906521  | 96914303  | 367           | 0.120    | 1        | 1         | 6.631E-03 | 2.009E-02 | PB-GT      |
| EGLAM        | EGR-like, fibronectin type III and laminin G domains [Source:HGNC Symbol;Acc:26810]                                                            | chr5  | 36258511  | 36485123  | 1148          | 0.375    | 2        | 2         | 6.645E-03 | 2.011E-02 | PB-GT      |
| ST8SIA4      | ST8 alpha-N-acetylneuraminidase alpha-2,8-sialyltransferase 4 [Source:HGNC Symbol;Acc:23317]                                                   | chr13 | 17363023  | 17363023  | 291           | 0.112    | 1        | 1         | 6.655E-03 | 2.011E-02 | PB-GT      |
| MMP20        | matrix metalloproteinase 20 [Source:HGNC Symbol;Acc:7167]                                                                                      | chr11 | 102447566 | 102490363 | 330           | 0.120    | 1        | 1         | 6.659E-03 | 2.011E-02 | PB-GT      |
| YAP1         | Yes-associated protein 1 [Source:HGNC Symbol;Acc:16262]                                                                                        | chr10 | 10181192  | 10210454  | 1033          | 0.376    | 2        | 2         | 6.662E-03 | 2.011E-02 | PB-GT      |
| GFR2         | GDNF family receptor alpha 2 [Source:HGNC Symbol;Acc:4244]                                                                                     | chr8  | 21547915  | 2166889   | 308           | 0.120    | 1        | 1         | 6.696E-03 | 2.017E-02 | PB-GT      |
| HADHB        | hydroxyacyl-CoA dehydrogenase 3-ketoadipyl:CoA thiolase-iron:CoA hydratase (trifunctional protein), beta subunit [Source:HGNC Symbol;Acc:4803] | chr2  | 24646038  | 24651338  | 327           | 0.121    | 1        | 1         | 6.707E-03 | 2.017E-02 | PB-GT      |
| ANKK2        | ankyrin domain family 2 [Source:HGNC Symbol;Acc:25570]                                                                                         | chr15 | 69259323  | 69269926  | 328           | 0.120    | 1        | 1         | 6.715E-03 | 2.017E-02 | PB-GT      |
| AG04         | argonaute RISC catalytic component 4 [Source:HGNC Symbol;Acc:18424]                                                                            | chr1  | 36273773  | 36323491  | 342           | 0.121    | 1        | 1         | 6.774E-03 | 2.030E-02 | PB-GT      |
| JP04         | junctionlin 2 [Source:HGNC Symbol;Acc:14202]                                                                                                   | chr20 | 42740335  | 42816123  | 326           | 0.121    | 1        | 1         | 6.775E-03 | 2.030E-02 | PB-GT      |
| CDKRAP2      | cyclin dependent kinase associated protein 2 [Source:HGNC Symbol;Acc:18672]                                                                    | chr9  | 12315617  | 12326449  | 1162          | 0.379    | 2        | 2         | 6.782E-03 | 2.030E-02 | PB-GT      |
| CCDC176      | coiled-coil domain containing 176 [Source:HGNC Symbol;Acc:19855]                                                                               | chr14 | 74485056  | 74456499  | 339           | 0.122    | 1        | 1         | 6.824E-03 | 2.041E-02 | PB-GT      |
| EEF3E        | eukaryotic elongation factor, selenocysteine-tRNA-specific [Source:HGNC Symbol;Acc:24614]                                                      | chr3  | 127872207 | 128127485 | 1153          | 0.379    | 2        | 2         | 6.833E-03 | 2.041E-02 | PB-GT      |
| FFK1         | formylketoacyl synthase, platelet [Source:HGNC Symbol;Acc:24768]                                                                               | chr10 | 3109712   | 31129264  | 263           | 0.122    | 1        | 1         | 6.833E-03 | 2.041E-02 | PB-GT      |
| SMYD4        | SET and MYND domain containing 4 [Source:HGNC Symbol;Acc:21067]                                                                                | chr17 | 1682779   | 173928</  |               |          |          |           |           |           |            |



Table S1. Genes with significant transposon integrations in DLD-1 KRAS<sup>G12V</sup> cells after selection in low glucose medium.

| Gene ID    | Description                                                                                                                | Chrom | Start     | End       | # TTAAs sites | Expected | Observed | Libraries | P         | FDR       | Transposon |
|------------|----------------------------------------------------------------------------------------------------------------------------|-------|-----------|-----------|---------------|----------|----------|-----------|-----------|-----------|------------|
| IL34       | interleukin 34 [Source:HGNC Symbol;Acc:28520]                                                                              | chr16 | 70613798  | 70694585  | 315           | 0.136    | 1        | 1         | 8.425E-03 | 2.296E-02 | PB-GT      |
| GC2H1      | GT cyclohydrolase 1 [Source:HGNC Symbol;Acc:4193]                                                                          | chr12 | 45533877  | 45533877  | 379           | 1.136    | 1        | 1         | 8.446E-03 | 2.301E-02 | PB-GT      |
| E1F3A      | eukaryotic translation initiation factor 3, subunit A [Source:HGNC Symbol;Acc:32711]                                       | chr10 | 120794356 | 120840396 | 316           | 0.136    | 1        | 1         | 8.461E-03 | 2.301E-02 | PB-GT      |
| NDRC8      | NDRC8 kinetochore complex component [Source:HGNC Symbol;Acc:16099]                                                         | chr18 | 2671510   | 2618934   | 426           | 0.136    | 1        | 1         | 8.487E-03 | 2.303E-02 | PB-GT      |
| RNF217     | ring finger protein 217 [Source:HGNC Symbol;Acc:1487]                                                                      | chr5  | 62523691  | 62537739  | 1161          | 2.026    | 2        | 2         | 8.492E-03 | 2.303E-02 | PB-GT      |
| APF1B1     | adaptor-related protein complex 1, beta 1 subunit [Source:HGNC Symbol;Acc:554]                                             | chr22 | 29723669  | 29819168  | 323           | 0.136    | 1        | 1         | 8.495E-03 | 2.303E-02 | PB-GT      |
| RUVBL1     | RuvB-like 1 (E. coli) [Source:HGNC Symbol;Acc:10474]                                                                       | chr3  | 12773821  | 12782757  | 416           | 0.137    | 1        | 1         | 8.527E-03 | 2.308E-02 | PB-GT      |
| DCP2       | decapping enzyme homolog 3 (Drosophila) [Source:HGNC Symbol;Acc:24452]                                                     | chr5  | 19231298  | 11236667  | 419           | 0.137    | 1        | 1         | 8.547E-03 | 2.308E-02 | PB-GT      |
| ABCC4      | ATP-binding cassette, sub-family C (CFTR/MRP), member 4 [Source:HGNC Symbol;Acc:55]                                        | chr13 | 95672083  | 95953887  | 1704          | 0.411    | 2        | 2         | 8.552E-03 | 2.308E-02 | PB-GT      |
| MOK        | MOK protein kinase [Source:HGNC Symbol;Acc:3933]                                                                           | chr14 | 10269037  | 102771537 | 362           | 0.137    | 1        | 1         | 8.577E-03 | 2.308E-02 | PB-GT      |
| CSPT1      | C1 to 5 phase transition 1 [Source:HGNC Symbol;Acc:6621]                                                                   | chr16 | 11911955  | 12009399  | 318           | 0.137    | 1        | 1         | 8.578E-03 | 2.308E-02 | PB-GT      |
| MARK1      | MAP/microtubule affinity-regulating kinase 1 [Source:HGNC Symbol;Acc:6886]                                                 | chr1  | 220701568 | 220837803 | 1163          | 0.412    | 2        | 1         | 8.588E-03 | 2.308E-02 | PB-GT      |
| MSHA4E     | membrane-spanning 4-domains, subfamily A, member 4E [Source:HGNC Symbol;Acc:14268]                                         | chr11 | 60162304  | 60164069  | 377           | 0.137    | 1        | 1         | 8.594E-03 | 2.308E-02 | PB-GT      |
| DMC1       | DMC1 dosage suppressor on X1 homolog, meiosis-specific homologous recombination (yeast) [Source:HGNC Symbol;Acc:2927]      | chr22 | 38914954  | 38966291  | 325           | 0.137    | 1        | 1         | 8.596E-03 | 2.308E-02 | PB-GT      |
| CBX5       | chromobox homolog 5 [Source:HGNC Symbol;Acc:1555]                                                                          | chr12 | 54627424  | 54673886  | 311           | 0.137    | 1        | 1         | 8.600E-03 | 2.308E-02 | PB-GT      |
| HVCN1      | hybrid voltage-gated channel 1 [Source:HGNC Symbol;Acc:28240]                                                              | chr12 | 11106564  | 11142755  | 311           | 0.137    | 1        | 1         | 8.600E-03 | 2.308E-02 | PB-GT      |
| WBPL1      | WV domain binding protein 1-like [Source:HGNC Symbol;Acc:2510]                                                             | chr10 | 104503727 | 104578021 | 319           | 0.137    | 1        | 1         | 8.615E-03 | 2.308E-02 | PB-GT      |
| EMB        | emodin [Source:HGNC Symbol;Acc:30465]                                                                                      | chr5  | 49892026  | 49793082  | 421           | 0.137    | 1        | 1         | 8.625E-03 | 2.308E-02 | PB-GT      |
| TTT14      | tetrazinone transcript, Y-linked 14 (non-protein coding) [Source:HGNC Symbol;Acc:18495]                                    | chrY  | 21034387  | 21238302  | 1322          | 0.137    | 1        | 1         | 8.629E-03 | 2.308E-02 | PB-GT      |
| CALCB      | cationenin-related polypeptide beta [Source:HGNC Symbol;Acc:1438]                                                          | chr11 | 14026543  | 15103888  | 1136          | 0.413    | 2        | 2         | 8.665E-03 | 2.316E-02 | PB-GT      |
| AQP4-AS1   | AQP4 antisense RNA 1 [Source:HGNC Symbol;Acc:26399]                                                                        | chr18 | 24235706  | 24770662  | 3880          | 1.235    | 4        | 2         | 8.696E-03 | 2.322E-02 | PB-GT      |
| ACOX1      | acyl-CoA oxidase 1 (mitochondrial) [Source:HGNC Symbol;Acc:3934]                                                           | chr11 | 114490150 | 111875799 | 2144          | 0.790    | 3        | 2         | 8.714E-03 | 2.324E-02 | PB-GT      |
| ANKRD44-T1 | ANKRD44 intronic transcript 1 (non-protein coding) [Source:HGNC Symbol;Acc:41477]                                          | chr2  | 198115582 | 198167243 | 376           | 0.139    | 1        | 1         | 8.762E-03 | 2.334E-02 | PB-GT      |
| USP47      | ubiquitin specific peptidase 47 [Source:HGNC Symbol;Acc:20076]                                                             | chr11 | 11862970  | 11980670  | 1141          | 0.415    | 2        | 1         | 8.769E-03 | 2.334E-02 | PB-GT      |
| MBOAT8     | mannose 6-phosphate 8-O-acetyltransferase 8 [Source:HGNC Symbol;Acc:28341]                                                 | chr10 | 44869661  | 44941851  | 323           | 0.139    | 1        | 1         | 8.822E-03 | 2.338E-02 | PB-GT      |
| SPPL3      | signal peptide peptidase like 3 [Source:HGNC Symbol;Acc:30424]                                                             | chr12 | 121200313 | 121342174 | 942           | 0.416    | 2        | 1         | 8.799E-03 | 2.338E-02 | PB-GT      |
| GALNT2     | UDP-N-acetyl-alpha-D-galactosamine polypeptide N-acetylglucosaminyltransferase 2 (GalNAc-T2) [Source:HGNC Symbol;Acc:4124] | chr1  | 230193536 | 230417870 | 1174          | 0.416    | 2        | 1         | 8.806E-03 | 2.337E-02 | PB-GT      |
| ALOX5      | arachidonate 5-lipoxygenase [Source:HGNC Symbol;Acc:435]                                                                   | chr10 | 44869661  | 44941851  | 323           | 0.139    | 1        | 1         | 8.822E-03 | 2.338E-02 | PB-GT      |
| RAPGEF4    | Rap guanine nucleotide exchange factor (GEF) 4 [Source:HGNC Symbol;Acc:16626]                                              | chr2  | 173600002 | 173917621 | 2153          | 0.794    | 3        | 2         | 8.838E-03 | 2.340E-02 | PB-GT      |
| HEG1       | heparin development protein with EGF-like domains 1 [Source:HGNC Symbol;Acc:29227]                                         | chr3  | 124684554 | 124774802 | 425           | 0.140    | 1        | 1         | 8.883E-03 | 2.350E-02 | PB-GT      |
| REL        | reticuloendotheliosis viral oncogene homolog B (avian) [Source:HGNC Symbol;Acc:1954]                                       | chr10 | 11189559  | 11190454  | 1269          | 0.420    | 1        | 1         | 8.886E-03 | 2.351E-02 | PB-GT      |
| OST1F      | osteocalcin stimulating factor 1 [Source:HGNC Symbol;Acc:8510]                                                             | chr9  | 77703459  | 77762181  | 427           | 0.140    | 1        | 1         | 8.924E-03 | 2.356E-02 | PB-GT      |
| SCTR       | secretin receptor [Source:HGNC Symbol;Acc:10608]                                                                           | chr2  | 120174719 | 120282070 | 380           | 0.140    | 1        | 1         | 8.941E-03 | 2.357E-02 | PB-GT      |
| FAM214A    | family with sequence similarity 214, member A [Source:HGNC Symbol;Acc:25609]                                               | chr15 | 43737314  | 43794922  | 1138          | 0.420    | 1        | 1         | 8.948E-03 | 2.357E-02 | PB-GT      |
| NCOA3      | nuclear receptor coactivator 3 [Source:HGNC Symbol;Acc:6707]                                                               | chr20 | 46130601  | 46288821  | 1127          | 0.419    | 2        | 1         | 8.979E-03 | 2.362E-02 | PB-GT      |
| MKRNS      | makorin ring finger protein 3 [Source:HGNC Symbol;Acc:7114]                                                                | chr15 | 23810454  | 23873084  | 382           | 0.140    | 1        | 1         | 8.985E-03 | 2.362E-02 | PB-GT      |
| TFC        | TFC-keloid gene [Source:HGNC Symbol;Acc:11758]                                                                             | chr3  | 600426005 | 100467810 | 403           | 0.140    | 1        | 1         | 8.993E-03 | 2.362E-02 | PB-GT      |
| WBPL2      | WBPL2 N-terminal like [Source:HGNC Symbol;Acc:28389]                                                                       | chr22 | 42394729  | 42454460  | 333           | 0.141    | 1        | 1         | 9.004E-03 | 2.363E-02 | PB-GT      |
| RNF128     | ring finger protein 128, E3 ubiquitin protein ligase [Source:HGNC Symbol;Acc:21153]                                        | chr1  | 105947024 | 106042223 | 845           | 0.413    | 1        | 1         | 9.028E-03 | 2.367E-02 | PB-GT      |
| STK39      | serine/threonine kinase 39 [Source:HGNC Symbol;Acc:1771]                                                                   | chr2  | 688110500 | 688110500 | 319           | 0.141    | 1        | 1         | 9.031E-03 | 2.367E-02 | PB-GT      |
| CLEC3A     | C-type lectin domain family 9, member A [Source:HGNC Symbol;Acc:26705]                                                     | chr12 | 101832262 | 10218555  | 321           | 0.142    | 1        | 1         | 9.135E-03 | 2.390E-02 | PB-GT      |
| MARP26     | mitochondrial-activated protein kinase 6 [Source:HGNC Symbol;Acc:83645]                                                    | chr7  | 67410331  | 67819122  | 786           | 0.422    | 2        | 1         | 9.167E-03 | 2.392E-02 | PB-GT      |
| MRP58      | mitochondrial ribosomal protein S5 [Source:HGNC Symbol;Acc:14468]                                                          | chr2  | 67529552  | 68511179  | 385           | 0.142    | 1        | 1         | 9.176E-03 | 2.392E-02 | PB-GT      |
| ZNFR70     | zinc finger protein 70 [Source:HGNC Symbol;Acc:32470]                                                                      | chr19 | 23258012  | 2330021   | 413           | 0.142    | 1        | 1         | 9.171E-03 | 2.392E-02 | PB-GT      |
| PTFRP      | protein tyrosine phosphatase receptor type C [Source:HGNC Symbol;Acc:10657]                                                | chr10 | 198807011 | 19927545  | 1193          | 0.423    | 2        | 1         | 9.206E-03 | 2.398E-02 | PB-GT      |
| SH3BP5     | SH3-domain binding protein 5 (BTK-associated) [Source:HGNC Symbol;Acc:16626]                                               | chr3  | 52963360  | 53282575  | 435           | 0.142    | 1        | 1         | 9.204E-03 | 2.398E-02 | PB-GT      |
| OPN1H      | oligoprenin 1 [Source:HGNC Symbol;Acc:4184]                                                                                | chrX  | 67262186  | 67653755  | 2541          | 0.423    | 2        | 1         | 9.238E-03 | 2.402E-02 | PB-GT      |
| GCNWL1     | glucocorticoid-inducible nuclear protein 1 [Source:HGNC Symbol;Acc:2749]                                                   | chr2  | 208578204 | 209266263 | 367           | 0.143    | 1        | 1         | 9.258E-03 | 2.405E-02 | PB-GT      |
| SSX2P1     | synovial sarcoma, X breakpoint 2 interacting protein [Source:HGNC Symbol;Acc:16509]                                        | chr1  | 85109390  | 85154648  | 404           | 0.143    | 1        | 1         | 9.317E-03 | 2.416E-02 | PB-GT      |
| SLC22A12   | solute carrier family 22 (facilitated glucose transporter), member 12 [Source:HGNC Symbol;Acc:18067]                       | chr6  | 13430935  | 13473774  | 405           | 0.143    | 1        | 1         | 9.318E-03 | 2.416E-02 | PB-GT      |
| VCAN       | versican proteoglycan 1 [Source:HGNC Symbol;Acc:41938]                                                                     | chr5  | 62382171  | 62371139  | 459           | 0.143    | 1        | 1         | 9.343E-03 | 2.417E-02 | PB-GT      |
| IL31RA     | interleukin 31 receptor A [Source:HGNC Symbol;Acc:18969]                                                                   | chr5  | 55147207  | 55218878  | 439           | 0.143    | 1        | 1         | 9.343E-03 | 2.417E-02 | PB-GT      |
| KIAA1324   | KIAA1324 [Source:HGNC Symbol;Acc:29618]                                                                                    | chr1  | 109656301 | 109749401 | 405           | 0.143    | 1        | 1         | 9.361E-03 | 2.419E-02 | PB-GT      |
| EFR3A      | EFR3A homolog A (S. cerevisiae) [Source:HGNC Symbol;Acc:28970]                                                             | chr10 | 139216335 | 13925889  | 1048          | 0.426    | 1        | 1         | 9.366E-03 | 2.420E-02 | PB-GT      |
| CASZ1      | castor zinc finger 1 [Source:HGNC Symbol;Acc:26002]                                                                        | chr1  | 10696661  | 10695707  | 406           | 0.144    | 1        | 1         | 9.405E-03 | 2.424E-02 | PB-GT      |
| KCNQ9-IT1  | KCNQ9 intronic transcript 1 (non-protein coding) [Source:HGNC Symbol;Acc:41354]                                            | chr6  | 73342223  | 73385282  | 407           | 0.144    | 1        | 1         | 9.406E-03 | 2.424E-02 | PB-GT      |
| CHST15     | chondroitin 6-sulfate 15 [Source:HGNC Symbol;Acc:18137]                                                                    | chr16 | 25718164  | 25794561  | 326           | 0.143    | 1        | 1         | 9.411E-03 | 2.424E-02 | PB-GT      |
| SBPON      | somatostatin B and thymosin, protein 1 domain containing [Source:HGNC Symbol;Acc:30362]                                    | chr6  | 73977775  | 74036323  | 370           | 0.145    | 1        | 1         | 9.513E-03 | 2.447E-02 | PB-GT      |
| JOSEF1     | IQ motif and Sec7 domain 1 [Source:HGNC Symbol;Acc:29112]                                                                  | chr3  | 12387119  | 13114617  | 441           | 0.145    | 1        | 1         | 9.531E-03 | 2.449E-02 | PB-GT      |
| C10orf107  | C10orf107 protein [Source:HGNC Symbol;Acc:28678]                                                                           | chr10 | 34427110  | 34519254  | 389           | 0.145    | 1        | 1         | 9.542E-03 | 2.449E-02 | PB-GT      |
| PRKAG2     | protein kinase, AGC-activated, gamma 2 non-catalytic subunit [Source:HGNC Symbol;Acc:3386]                                 | chr7  | 15123197  | 15174210  | 1283          | 0.429    | 2        | 1         | 9.560E-03 | 2.452E-02 | PB-GT      |
| EFCAB14    | EF-hand calcium binding domain 14 [Source:HGNC Symbol;Acc:29051]                                                           | chr1  | 47124366  | 47184824  | 410           | 0.145    | 1        | 1         | 9.582E-03 | 2.453E-02 | PB-GT      |
| OPN5       | oligoprenin 5 [Source:HGNC Symbol;Acc:19992]                                                                               | chr16 | 47137818  | 47200516  | 411           | 0.145    | 1        | 1         | 9.582E-03 | 2.453E-02 | PB-GT      |
| SLC17A5    | solute carrier family 17 (anion/sugar transporter), member 5 [Source:HGNC Symbol;Acc:10933]                                | chr6  | 74303102  | 74363878  | 412           | 0.146    | 1        | 1         | 9.627E-03 | 2.459E-02 | PB-GT      |
| RACGAP1    | Rac GTPase activating protein 1 [Source:HGNC Symbol;Acc:3904]                                                              | chr5  | 50370706  | 50426919  | 330           | 0.146    | 1        | 1         | 9.629E-03 | 2.459E-02 | PB-GT      |
| GTF2C      | general transcription factor IIC, polypeptide 1, alpha [Source:HGNC Symbol;Acc:4664]                                       | chr1  | 47470813  | 47512914  | 238           | 0.146    | 1        | 1         | 9.631E-03 | 2.459E-02 | PB-GT      |
| UBE2V2     | ubiquitin-conjugating enzyme E2 variant 2 [Source:HGNC Symbol;Acc:12495]                                                   | chr8  | 48920660  | 48977288  | 373           | 0.146    | 1        | 1         | 9.661E-03 | 2.463E-02 | PB-GT      |
| PRPF18     | PRP18 pre-mRNA processing factor 18 homolog (S. cerevisiae) [Source:HGNC Symbol;Acc:17351]                                 | chr10 | 40829927  | 40872968  | 389           | 0.146    | 1        | 1         | 9.661E-03 | 2.464E-02 | PB-GT      |
| RHBD1      | ribonucleoside diphosphate dependent domain containing 1 [Source:HGNC Symbol;Acc:20911]                                    | chr2  | 227700297 | 227889311 | 1170          | 0.431    | 2        | 1         | 9.710E-03 | 2.470E-02 | PB-GT      |
| ARNT       | aryl hydrocarbon receptor nuclear translocator [Source:HGNC Symbol;Acc:700]                                                | chr1  | 150782181 | 15089244  | 413           | 0.146    | 1        | 1         | 9.716E-03 | 2.470E-02 | PB-GT      |
| EMBP1      | embryonic pseudogene 1 [Source:HGNC Symbol;Acc:39611]                                                                      | chr1  | 12151143  | 12152991  | 114           | 0.146    | 1        | 1         | 9.718E-03 | 2.470E-02 | PB-GT      |
| IF16       | interferon, gamma-inducible protein 16 [Source:HGNC Symbol;Acc:5395]                                                       | chr1  | 158969758 | 159204945 | 416           | 0.147    | 1        | 1         | 9.815E-03 | 2.497E-02 | PB-GT      |
| ACER3      | alkaline ceramidase 3 [Source:HGNC Symbol;Acc:16066]                                                                       | chr11 | 76571911  | 76737941  | 1192          | 0.434    | 2        | 2         | 9.836E-03 | 2.497E-02 | PB-GT      |
| CAPN7      | capain 7 [Source:HGNC Symbol;Acc:1464]                                                                                     | chr8  | 6899759   | 6929425   | 449           | 0.148    | 1        | 1         | 9.839E-03 | 2.497E-02 | PB-GT      |
| TTCCO      | tetratricopeptide repeat domain 40 [Source:HGNC Symbol;Acc:25247]                                                          | chr10 | 134621896 | 134756327 | 343           | 0.148    | 1        | 1         | 9.892E-03 | 2.500E-02 | PB-GT      |
| LAMC2      | LAMC2 laminin type III procollagen C-1 alpha 2 (bacterial) [Source:HGNC Symbol;Acc:6509]                                   | chr7  | 55453141  | 55501435  | 442           | 0.148    | 1        | 1         | 9.895E-03 | 2.500E-02 | PB-GT      |
| DH18       | dyadema 18 [Source:HGNC Symbol;Acc:18379]                                                                                  | chr17 | 15981233  | 15981233  | 279           | 0.148    | 1        | 1         | 9.910E-03 | 2.501E-02 | PB-GT      |
| VAPA       | VAMP (vesicle-associated membrane protein)-associated protein A, 38kDa [Source:HGNC Symbol;Acc:12648]                      | chr2  | 9913999   | 9960218   | 464           | 0.148</  |          |           |           |           |            |

table S1. Genes with significant transposon integrations in DLD-1 KRAS<sup>G12V</sup> cells after selection in low glucose medium.

| Gene ID      | Description                                                                             | Chrom | Start     | End       | # TTAAs sites | Expected | Observed | Libraries | P           | FDR   | Transposon |
|--------------|-----------------------------------------------------------------------------------------|-------|-----------|-----------|---------------|----------|----------|-----------|-------------|-------|------------|
| P2RY14       | purinergic receptor P2Y, G-protein coupled, 14 [Source:HGNC Symbol;Acc:16442]           | chr3  | 150929905 | 150986255 | 517           | 1.170    | 1        | 1.289E-02 | 3.008E-02   | PB-GT |            |
| ADCY5        | adenylyl cyclase 5 [Source:HGNC Symbol;Acc:17070]                                       | chr3  | 123003143 | 123026603 | 517           | 1.170    | 1        | 1.289E-02 | 3.008E-02   | PB-GT |            |
| ZNF519       | zinc finger protein 519 [Source:HGNC Symbol;Acc:30574]                                  | chr18 | 14055456  | 14132488  | 532           | 1.070    | 1        | 1.294E-02 | 3.019E-02   | PB-GT |            |
| PXDN         | peroxidase homology [Source:HGNC Symbol;Acc:14966]                                      | chr2  | 16356569  | 1748284   | 462           | 1.070    | 1        | 1.296E-02 | 3.019E-02   | PB-GT |            |
| SLTM         | SLF-like, transcription modulator family 1 [Source:HGNC Symbol;Acc:20709]               | chr5  | 59111246  | 59223862  | 464           | 1.070    | 1        | 1.300E-02 | 3.026E-02   | PB-GT |            |
| EXOC6B       | exocyst complex component 6B [Source:HGNC Symbol;Acc:17085]                             | chr2  | 72403113  | 73053170  | 5139          | 1.894    | 5        | 1.305E-02 | 3.033E-02   | PB-GT |            |
| AS55         | ankyrin repeat and SOCS box containing 5 [Source:HGNC Symbol;Acc:17180]                 | chr4  | 17134824  | 177198722 | 522           | 1.171    | 1        | 1.306E-02 | 3.033E-02   | PB-GT |            |
| CCND3        | cyclin D3 [Source:HGNC Symbol;Acc:16653]                                                | chr5  | 41920271  | 4241005   | 484           | 1.171    | 1        | 1.307E-02 | 3.033E-02   | PB-GT |            |
| CCDC30       | coiled-coil domain containing 30 [Source:HGNC Symbol;Acc:26103]                         | chr1  | 42529001  | 43120355  | 1361          | 4.82     | 2        | 1.307E-02 | 3.033E-02   | PB-GT |            |
| C7orf46      | chromosome 7 open reading frame 46 [Source:HGNC Symbol;Acc:24322]                       | chr7  | 13477115  | 13485547  | 514           | 1.172    | 1        | 1.317E-02 | 3.052E-02   | PB-GT |            |
| ARHGAP12     | Rho GTPase activating protein 12 [Source:HGNC Symbol;Acc:16346]                         | chr10 | 30294365  | 32217442  | 1124          | 4.58     | 2        | 1.321E-02 | 3.056E-02   | PB-GT |            |
| FAM208A      | family with sequence similarity 208, member A [Source:HGNC Symbol;Acc:30314]            | chr3  | 56654161  | 56717265  | 524           | 1.172    | 1        | 1.322E-02 | 3.056E-02   | PB-GT |            |
| MMS22L       | MMS22-like, DNA repair protein [Source:HGNC Symbol;Acc:21475]                           | chr8  | 97590037  | 97731093  | 1372          | 4.885    | 2        | 1.327E-02 | 3.065E-02   | PB-GT |            |
| YTHDF3       | YTH domain family, member 3 [Source:HGNC Symbol;Acc:29465]                              | chr6  | 64081112  | 64125346  | 441           | 1.172    | 1        | 1.327E-02 | 3.065E-02   | PB-GT |            |
| VDR          | vitamin D (1,25-dihydroxyvitamin D3) receptor [Source:HGNC Symbol;Acc:12679]            | chr12 | 48235320  | 48338831  | 392           | 1.173    | 1        | 1.335E-02 | 3.080E-02   | PB-GT |            |
| SMAP2        | small ARHGAP2 [Source:HGNC Symbol;Acc:25042]                                            | chr1  | 40810522  | 40888998  | 490           | 1.174    | 1        | 1.343E-02 | 3.097E-02   | PB-GT |            |
| FBCO3B       | F-box protein 3B [Source:HGNC Symbol;Acc:29844]                                         | chr9  | 44972489  | 44972399  | 532           | 1.174    | 1        | 1.345E-02 | 3.098E-02   | PB-GT |            |
| EBNA1BP2     | EBNA1 binding protein 2 [Source:HGNC Symbol;Acc:15531]                                  | chr1  | 43629846  | 43736607  | 490           | 1.174    | 1        | 1.346E-02 | 3.101E-02   | PB-GT |            |
| EFCAB7       | EF-hand calcium binding domain 7 [Source:HGNC Symbol;Acc:15861]                         | chr2  | 37590942  | 37668366  | 468           | 1.174    | 1        | 1.346E-02 | 3.101E-02   | PB-GT |            |
| ANKRD42      | ankyrin repeat domain 42 [Source:HGNC Symbol;Acc:26752]                                 | chr11 | 82304781  | 82397136  | 479           | 1.174    | 1        | 1.354E-02 | 3.110E-02   | PB-GT |            |
| METAP1       | methylornithine aminopeptidase 1 [Source:HGNC Symbol;Acc:15789]                         | chr4  | 99916771  | 99939364  | 534           | 1.175    | 1        | 1.363E-02 | 3.128E-02   | PB-GT |            |
| EFCAB7       | EF-hand calcium binding domain 7 [Source:HGNC Symbol;Acc:15861]                         | chr2  | 37590942  | 37668366  | 468           | 1.174    | 1        | 1.346E-02 | 3.101E-02   | PB-GT |            |
| HNRNPFC      | heterogeneous nuclear ribonucleoprotein C (C1/C2) [Source:HGNC Symbol;Acc:5035]         | chr14 | 21677295  | 21737653  | 488           | 1.175    | 1        | 1.365E-02 | 3.128E-02   | PB-GT |            |
| CHIC2        | cysteine-rich hydrophobic domain 2 [Source:HGNC Symbol;Acc:1935]                        | chr4  | 54875956  | 54930057  | 537           | 1.176    | 1        | 1.377E-02 | 3.153E-02   | PB-GT |            |
| WDNR1        | WD repeat domain 47 [Source:HGNC Symbol;Acc:1911]                                       | chr9  | 44972489  | 44972399  | 532           | 1.176    | 1        | 1.345E-02 | 3.098E-02   | PB-GT |            |
| ATP8B9P      | ATPase, class I, type 8B, member 5, pseudogene [Source:HGNC Symbol;Acc:27245]           | chr9  | 35405722  | 35403268  | 538           | 1.176    | 1        | 1.383E-02 | 3.156E-02   | PB-GT |            |
| SPTLC1       | serine palmitoyltransferase, long chain base subunit 1 [Source:HGNC Symbol;Acc:11277]   | chr9  | 94794281  | 94877066  | 538           | 1.176    | 1        | 1.383E-02 | 3.156E-02   | PB-GT |            |
| UBU2U        | ubiquitin-conjugating enzyme E2U (putative) [Source:HGNC Symbol;Acc:28559]              | chr1  | 64669310  | 64733053  | 498           | 1.176    | 1        | 1.385E-02 | 3.157E-02   | PB-GT |            |
| TOR1P1       | topoisomerase (DNA) 1 binding protein 1 [Source:HGNC Symbol;Acc:17008]                  | chr3  | 133317019 | 133389737 | 538           | 1.177    | 1        | 1.386E-02 | 3.163E-02   | PB-GT |            |
| STX16        | syntaxin 16 [Source:HGNC Symbol;Acc:26330]                                              | chr8  | 90523049  | 90523191  | 482           | 1.177    | 1        | 1.390E-02 | 3.163E-02   | PB-GT |            |
| SGPL1        | sphingosine-1-phosphate lyase 1 [Source:HGNC Symbol;Acc:21847]                          | chr10 | 72575117  | 72640930  | 411           | 1.177    | 1        | 1.393E-02 | 3.167E-02   | PB-GT |            |
| CREBBF       | CREB3 regulatory factor [Source:HGNC Symbol;Acc:24050]                                  | chr5  | 17243355  | 17256291  | 543           | 1.177    | 1        | 1.398E-02 | 3.175E-02   | PB-GT |            |
| SCSTD1C1     | SCSTD domain containing 1 [Source:HGNC Symbol;Acc:29148]                                | chr7  | 18501106  | 18513625  | 531           | 1.177    | 1        | 1.405E-02 | 3.176E-02   | PB-GT |            |
| GON4L        | gon-4-like (C. elegans) [Source:HGNC Symbol;Acc:25973]                                  | chr1  | 15571908  | 15582919  | 501           | 1.177    | 1        | 1.401E-02 | 3.176E-02   | PB-GT |            |
| BOLL         | bol, boule-like (Drosophila) [Source:HGNC Symbol;Acc:14273]                             | chr2  | 19859160  | 198651486 | 482           | 1.178    | 1        | 1.403E-02 | 3.176E-02   | PB-GT |            |
| HUS1         | HUS1 checkpoint homolog (S. pombe) [Source:HGNC Symbol;Acc:5300]                        | chr7  | 17535329  | 175401178 | 174           | 1.178    | 1        | 1.405E-02 | 3.176E-02   | PB-GT |            |
| CD2AP        | CD2-associated protein [Source:HGNC Symbol;Acc:14258]                                   | chr6  | 47445525  | 47594999  | 1403          | 4.96     | 2        | 1.408E-02 | 3.183E-02   | PB-GT |            |
| PCOLCE2      | procollagen C-endopeptidase enhancer 2 [Source:HGNC Symbol;Acc:3739]                    | chr3  | 14234764  | 142360945 | 543           | 1.178    | 1        | 1.413E-02 | 3.194E-02   | PB-GT |            |
| CSN          | cohesin [Source:HGNC Symbol;Acc:452]                                                    | chr10 | 123970719 | 124098121 | 545           | 1.179    | 1        | 1.415E-02 | 3.196E-02   | PB-GT |            |
| APLP2        | amyloid beta (A4) precursor-like protein 2 [Source:HGNC Symbol;Acc:598]                 | chr11 | 129839732 | 130014699 | 491           | 1.179    | 1        | 1.418E-02 | 3.199E-02   | PB-GT |            |
| MAL2L2       | malemsterin-like 2 (Drosophila) [Source:HGNC Symbol;Acc:16259]                          | chr10 | 95797972  | 95802390  | 482           | 1.181    | 3        | 1.421E-02 | 3.202E-02   | PB-GT |            |
| PLCE1        | phospholipase C, epsilon 1 [Source:HGNC Symbol;Acc:17175]                               | chr10 | 85734746  | 86088148  | 2126          | 7.13     | 2        | 1.423E-02 | 3.203E-02   | PB-GT |            |
| TMEM220-AS1  | TMEM220 antisense RNA 1 [Source:HGNC Symbol;Acc:44357]                                  | chr17 | 10633113  | 10718481  | 338           | 1.179    | 1        | 1.425E-02 | 3.203E-02   | PB-GT |            |
| E2F7         | basic leucine zipper and WC domain 2 [Source:HGNC Symbol;Acc:16808]                     | chr7  | 10583756  | 10587446  | 536           | 1.179    | 1        | 1.425E-02 | 3.203E-02   | PB-GT |            |
| TNMRD3       | thioredoxin reductase 3 [Source:HGNC Symbol;Acc:20667]                                  | chr3  | 12629622  | 12637398  | 546           | 1.179    | 1        | 1.426E-02 | 3.208E-02   | PB-GT |            |
| C3orf70      | chromosome 3 open reading frame 70 [Source:HGNC Symbol;Acc:33731]                       | chr3  | 184795938 | 184870802 | 547           | 1.180    | 1        | 1.433E-02 | 3.215E-02   | PB-GT |            |
| HMC20A       | hemochromatosis 20A [Source:HGNC Symbol;Acc:5021]                                       | chr5  | 77172754  | 77173749  | 489           | 1.180    | 1        | 1.435E-02 | 3.215E-02   | PB-GT |            |
| G3BP2        | GTPase activating protein (SH3 domain) binding protein 2 [Source:HGNC Symbol;Acc:30291] | chr4  | 76567966  | 765649709 | 549           | 1.180    | 1        | 1.436E-02 | 3.215E-02   | PB-GT |            |
| TNFRSF21     | tumor necrosis factor receptor superfamily, member 21 [Source:HGNC Symbol;Acc:13469]    | chr10 | 49179288  | 49277641  | 509           | 1.180    | 1        | 1.437E-02 | 3.215E-02   | PB-GT |            |
| ARHGAP21     | Rho GTPase activating protein 21 [Source:HGNC Symbol;Acc:23725]                         | chr10 | 44872538  | 44925897  | 1161          | 4.12     | 2        | 1.438E-02 | 3.215E-02   | PB-GT |            |
| KIAA1324L1   | KIAA1324-like, human [Source:HGNC Symbol;Acc:21945]                                     | chr7  | 88502222  | 88689015  | 1497          | 5.00     | 2        | 1.441E-02 | 3.217E-02   | PB-GT |            |
| MYO1E        | myosin IE [Source:HGNC Symbol;Acc:7599]                                                 | chr5  | 59427113  | 59665099  | 1361          | 5.00     | 2        | 1.441E-02 | 3.217E-02   | PB-GT |            |
| FYI          | FYI oncogene related to SRC, FGR, YES [Source:HGNC Symbol;Acc:4037]                     | chr6  | 61198135  | 61234685  | 1416          | 5.00     | 2        | 1.442E-02 | 3.217E-02   | PB-GT |            |
| AGPAT5       | 1-acylglycerol-3-phosphate O-acyltransferase 5 [Source:HGNC Symbol;Acc:20886]           | chr8  | 66585878  | 6671184   | 482           | 1.181    | 1        | 1.446E-02 | 3.228E-02   | PB-GT |            |
| ERO1L        | ERO1-like (S. cerevisiae) [Source:HGNC Symbol;Acc:13280]                                | chr14 | 53106634  | 53162818  | 504           | 1.181    | 1        | 1.451E-02 | 3.229E-02   | PB-GT |            |
| GLRX         | glutathione (S-transferase) [Source:HGNC Symbol;Acc:430]                                | chr12 | 49087023  | 49183709  | 525           | 1.181    | 1        | 1.452E-02 | 3.230E-02   | PB-GT |            |
| FAM184A      | family with sequence similarity 184, member A [Source:HGNC Symbol;Acc:20991]            | chr6  | 11928028  | 11947052  | 1420          | 5.02     | 2        | 1.453E-02 | 3.230E-02   | PB-GT |            |
| ZBTB40       | zinc finger and BTB domain containing 40 [Source:HGNC Symbol;Acc:29045]                 | chr1  | 22778344  | 22857050  | 512           | 1.181    | 1        | 1.459E-02 | 3.241E-02   | PB-GT |            |
| NTS2C3       | R nucleolar stress domain containing 3 [Source:HGNC Symbol;Acc:30626]                   | chr1  | 94192421  | 94210123  | 412           | 1.181    | 1        | 1.466E-02 | 3.243E-02   | PB-GT |            |
| LEF-1AS1     | LEF1 antisense RNA 1 [Source:HGNC Symbol;Acc:40339]                                     | chr4  | 109088881 | 10917792  | 556           | 1.182    | 1        | 1.470E-02 | 3.259E-02   | PB-GT |            |
| UBDZ22       | ubiquitin-conjugating enzyme E2D 22 [Source:HGNC Symbol;Acc:12475]                      | chr5  | 138990016 | 139000016 | 568           | 1.182    | 1        | 1.471E-02 | 3.259E-02   | PB-GT |            |
| IQCB1        | IQ motif containing B1 [Source:HGNC Symbol;Acc:28844]                                   | chr3  | 21488610  | 21488610  | 525           | 1.182    | 1        | 1.471E-02 | 3.259E-02   | PB-GT |            |
| PTDS1        | phosphatidylserine synthase 1 [Source:HGNC Symbol;Acc:5987]                             | chr8  | 97273943  | 97349223  | 468           | 1.183    | 1        | 1.484E-02 | 3.272E-02   | PB-GT |            |
| BDNF         | brain-derived neurotrophic factor [Source:HGNC Symbol;Acc:1053]                         | chr2  | 27676440  | 27743605  | 503           | 1.183    | 1        | 1.484E-02 | 3.272E-02   | PB-GT |            |
| STX3         | syntaxin 3 [Source:HGNC Symbol;Acc:11438]                                               | chr22 | 11338891  | 11349755  | 434           | 1.183    | 1        | 1.487E-02 | 3.280E-02   | PB-GT |            |
| C22orf59     | chromosome 22 open reading frame 59 [Source:HGNC Symbol;Acc:27012]                      | chr22 | 10338891  | 10349755  | 434           | 1.183    | 1        | 1.487E-02 | 3.280E-02   | PB-GT |            |
| PLAC1        | placenta-specific 1 [Source:HGNC Symbol;Acc:30230]                                      | chr10 | 13269868  | 13269868  | 1101          | 4.18     | 2        | 1.490E-02 | 3.282E-02   | PB-GT |            |
| FAF1L2       | actin filament associated protein 1-like 2 [Source:HGNC Symbol;Acc:25001]               | chr10 | 16054583  | 16164515  | 426           | 1.183    | 1        | 1.490E-02 | 3.282E-02   | PB-GT |            |
| TSN1         | tenascin 1 [Source:HGNC Symbol;Acc:11737]                                               | chr2  | 21886452  | 218887718 | 498           | 1.184    | 1        | 1.492E-02 | 3.284E-02   | PB-GT |            |
| COL22A1      | Collagen type XXII, alpha 1 [Source:HGNC Symbol;Acc:22969]                              | chr8  | 139640478 | 139652049 | 2599          | 8.99     | 3        | 1.492E-02 | 3.284E-02   | PB-GT |            |
| COL13A1      | collagen, type XIII, alpha 1 [Source:HGNC Symbol;Acc:2190]                              | chr2  | 64319786  | 64371588  | 500           | 1.184    | 1        | 1.504E-02 | 3.300E-02   | PB-GT |            |
| FAM177A1     | family with sequence similarity 177, member A1 [Source:HGNC Symbol;Acc:19829]           | chr7  | 11616444  | 11724031  | 428           | 1.184    | 1        | 1.504E-02 | 3.300E-02   | PB-GT |            |
| KTNI         | KTNI antisense RNA 1 [Source:HGNC Symbol;Acc:19842]                                     | chr14 | 55955966  | 56046828  | 515           | 1.185    | 1        | 1.511E-02 | 3.310E-02   | PB-GT |            |
| KTN1-AS1     | kyatanin 1 antisense RNA [Source:HGNC Symbol;Acc:30230]                                 | chr5  | 13955427  | 139661637 | 568           | 1.185    | 1        | 1.521E-02 | 3.330E-02   | PB-GT |            |
| C12orf65     | chromosome 12 open reading frame 65 [Source:HGNC Symbol;Acc:26456]                      | chr12 | 6986334   | 6987005   | 458           | 1.185    | 2        | 1.521E-02 | 3.330E-02   | PB-GT |            |
| C12orf45     | chromosome 12 open reading frame 45 [Source:HGNC Symbol;Acc:28628]                      | chr12 | 10538008  | 10544315  | 423           | 1.187    | 1        | 1.540E-02 | 3.366E-02   | PB-GT |            |
| ABLIM5       | actin binding LIM protein family member 3 [Source:HGNC Symbol;Acc:29132]                | chr5  | 148321046 | 148364015 | 574           | 1.187    | 1        | 1.552E-02 | 3.388E-02   | PB-GT |            |
| NABP2L2      | NABP2 binding protein 2 [Source:HGNC Symbol;Acc:26916]                                  | chr2  | 33006554  | 33027970  | 779           | 1.189    | 2        | 1.562E-02 | 3.445E-02   | PB-GT |            |
| GLDC         | glycine decarboxylase (decarboxylating) [Source:HGNC Symbol;Acc:44193]                  | chr9  | 6532464   | 6544560   | 574           | 1.188    | 1        | 1.562E-02 | 3.445E-02   | PB-GT |            |
| GLTSD2       | glycyltransferase 8 domain containing 2 [Source:HGNC Symbol;Acc:24830]                  | chr12 | 10432672  | 104497361 | 427           | 1.188    | 1        | 1.566E-02 | 3.444E-02   | PB-GT |            |
| SPTB         | actin, beta, erythrocytic [Source:HGNC Symbol;Acc:11274]                                | chr2  | 65213002  | 653463601 | 527           | 1.189    | 1        | 1.567E-02 | 3.449E-02   | PB-GT |            |
| INIT-FAM188B | INIT-FAM188 readthrough (non-protein coding) [Source:HGNC Symbol;Acc:41995]             | chr7  | 30791753  | 30931696  | 566           | 1.189    | 1        | 1.579E-02 | 3.428E-02</ |       |            |

**Table S1. Genes with significant transposon integrations in DLD-1 KRAS<sup>G12V</sup> cells after selection in low glucose medium.**

| Gene ID       | Description                                                                                                             | Chrom | Start     | End       | # TTAAs sites | Expected | Observed | Libraries | P         | FDR       | Transposon |
|---------------|-------------------------------------------------------------------------------------------------------------------------|-------|-----------|-----------|---------------|----------|----------|-----------|-----------|-----------|------------|
| KIAA1731      | KIAA1731 [Source:HGNC Symbol;Acc:29366]                                                                                 | chr11 | 93394805  | 93463522  | 960           | 204      | 1        | 1         | 1.818E-02 | 3.711E-02 | PB-GT      |
| AB2C4         | ATP-binding cassette, sub-family A (ABC1), member 4 [Source:HGNC Symbol;Acc:34]                                         | chr11 | 94453393  | 94918688  | 577           | 204      | 1        | 1         | 1.852E-02 | 3.728E-02 | PB-GT      |
| MALT1         | muscos associated lymphoid tissue lymphoma translocation gene 1 [Source:HGNC Symbol;Acc:8810]                           | chr18 | 56338618  | 56417319  | 639           | 204      | 1        | 1         | 1.828E-02 | 3.728E-02 | PB-GT      |
| SID11         | SID1 transmembrane family, member 1 [Source:HGNC Symbol;Acc:25967]                                                      | chr3  | 13251143  | 13348425  | 625           | 205      | 1        | 1         | 1.840E-02 | 3.753E-02 | PB-GT      |
| KF13A         | kinesin family member 13A [Source:HGNC Symbol;Acc:14566]                                                                | chr5  | 17759144  | 17798764  | 2465          | 206      | 1        | 1         | 1.843E-02 | 3.756E-02 | PB-GT      |
| CCDC53        | coiled-coil domain containing 53 [Source:HGNC Symbol;Acc:24256]                                                         | chr12 | 102406705 | 102542927 | 466           | 206      | 1        | 1         | 1.846E-02 | 3.760E-02 | PB-GT      |
| PAJ2          | praja ring finger 2, E3 ubiquitin protein ligase [Source:HGNC Symbol;Acc:17481]                                         | chr5  | 108670410 | 108746595 | 632           | 206      | 1        | 1         | 1.858E-02 | 3.780E-02 | PB-GT      |
| HUNK          | homology up-regulated nucleic-acid-associated protein [Source:HGNC Symbol;Acc:13326]                                    | chr1  | 33245623  | 33414946  | 816           | 206      | 1        | 1         | 1.859E-02 | 3.780E-02 | PB-GT      |
| DNACJ5B       | DnaJ (Hsp40) homolog, subfamily C, member 5 beta [Source:HGNC Symbol;Acc:24138]                                         | chr8  | 69633795  | 67012751  | 528           | 207      | 1        | 1         | 1.860E-02 | 3.780E-02 | PB-GT      |
| C7orf83       | chromosome 7 open reading frame 83 [Source:HGNC Symbol;Acc:26107]                                                       | chr7  | 89874488  | 89940377  | 620           | 207      | 1        | 1         | 1.872E-02 | 3.800E-02 | PB-GT      |
| DTF1B3        | DTF1-like 3 (C. elegans) [Source:HGNC Symbol;Acc:17109]                                                                 | chr19 | 32696655  | 32691904  | 603           | 207      | 1        | 1         | 1.875E-02 | 3.800E-02 | PB-GT      |
| SLC38A11      | solute carrier family 38, member 11 [Source:HGNC Symbol;Acc:26836]                                                      | chr2  | 165752696 | 165810335 | 564           | 208      | 1        | 1         | 1.884E-02 | 3.819E-02 | PB-GT      |
| CSNK1E        | casein kinase 1, epsilon [Source:HGNC Symbol;Acc:2453]                                                                  | chr22 | 36886997  | 38784527  | 484           | 209      | 1        | 1         | 1.885E-02 | 3.838E-02 | PB-GT      |
| ZNF429        | zinc finger protein 429 [Source:HGNC Symbol;Acc:16768]                                                                  | chr16 | 46521435  | 46891389  | 1290          | 209      | 1        | 1         | 1.900E-02 | 3.846E-02 | PB-GT      |
| VPS45         | vacuolar protein sorting 45 homolog (S. cerevisiae) [Source:HGNC Symbol;Acc:14579]                                      | chr1  | 150039699 | 150117505 | 591           | 209      | 1        | 1         | 1.909E-02 | 3.861E-02 | PB-GT      |
| C11orf80      | chromosome 11 open reading frame 80 [Source:HGNC Symbol;Acc:26197]                                                      | chr11 | 66511922  | 66610087  | 576           | 210      | 1        | 1         | 1.913E-02 | 3.866E-02 | PB-GT      |
| EIF2B3        | eukaryotic translation initiation factor 2B, subunit 3, epsilon, e2b3a [Source:HGNC Symbol;Acc:32061]                   | chr3  | 183532609 | 184402446 | 1702          | 210      | 1        | 1         | 1.925E-02 | 3.887E-02 | PB-GT      |
| EYA2          | eyes absent homolog 2 (Drosophila) [Source:HGNC Symbol;Acc:3520]                                                        | chr20 | 45523263  | 45817492  | 304           | 210      | 1        | 1         | 1.926E-02 | 3.887E-02 | PB-GT      |
| BRWD3         | brachyodomain and WD repeat domain containing 3 [Source:HGNC Symbol;Acc:17342]                                          | chrX  | 79926353  | 80065187  | 1264          | 211      | 1        | 1         | 1.930E-02 | 3.899E-02 | PB-GT      |
| SEL1L3        | sel-1 suppressor (lin-12 like) 3 (C. elegans) [Source:HGNC Symbol;Acc:29106]                                            | chr4  | 25749055  | 25985382  | 648           | 212      | 1        | 1         | 1.958E-02 | 3.943E-02 | PB-GT      |
| C10orf118     | chromosome 10 open reading frame 118 [Source:HGNC Symbol;Acc:24349]                                                     | chr10 | 115880621 | 115933979 | 493           | 212      | 1        | 1         | 1.959E-02 | 3.943E-02 | PB-GT      |
| KIAA1456      | KIAA1456 [Source:HGNC Symbol;Acc:28725]                                                                                 | chr9  | 12932151  | 12989022  | 544           | 213      | 1        | 1         | 1.967E-02 | 3.956E-02 | PB-GT      |
| USP10         | ubiquitin specific peptidase 10 [Source:HGNC Symbol;Acc:12608]                                                          | chr16 | 84733584  | 84813528  | 494           | 213      | 1        | 1         | 1.970E-02 | 3.959E-02 | PB-GT      |
| MAL2          | mal, T-cell differentiation protein 2 (gene/proteogen) [Source:HGNC Symbol;Acc:13634]                                   | chr8  | 12017723  | 120257913 | 549           | 215      | 1        | 1         | 2.000E-02 | 4.018E-02 | PB-GT      |
| ENKCH2        | enkephalinase 2 [Source:HGNC Symbol;Acc:30336]                                                                          | chr2  | 29490285  | 29534122  | 487           | 215      | 1        | 1         | 2.004E-02 | 4.022E-02 | PB-GT      |
| SH3BP3        | SH3 domain containing ring finger 3 [Source:HGNC Symbol;Acc:24699]                                                      | chr2  | 109745601 | 110262207 | 1541          | 215      | 2        | 2         | 2.008E-02 | 4.025E-02 | PB-GT      |
| RAG3          | Ras protein-specific guanine nucleotide-releasing factor 2 [Source:HGNC Symbol;Acc:9676]                                | chr5  | 9025494   | 90259975  | 170           | 216      | 1        | 1         | 2.009E-02 | 4.025E-02 | PB-GT      |
| TMED3         | transmembrane emp24 protein transport domain containing 3 [Source:HGNC Symbol;Acc:28889]                                | chr5  | 93953404  | 93991394  | 586           | 216      | 1        | 1         | 2.015E-02 | 4.030E-02 | PB-GT      |
| ZPLD1         | zona pellucida-like domain containing 1 [Source:HGNC Symbol;Acc:27022]                                                  | chr3  | 101818088 | 102198685 | 3103          | 219      | 3        | 3         | 2.019E-02 | 4.036E-02 | PB-GT      |
| C7orf5-LUC7L2 | C7orf5-LUC7L2 readthrough [Source:HGNC Symbol;Acc:44671]                                                                | chr7  | 139202105 | 139108196 | 648           | 217      | 1        | 1         | 2.032E-02 | 4.063E-02 | PB-GT      |
| TMHE          | transmembrane heptoylase, epistasis [Source:HGNC Symbol;Acc:18308]                                                      | chr2  | 54719776  | 54849696  | 901           | 219      | 1        | 1         | 2.036E-02 | 4.065E-02 | PB-GT      |
| EXOC5         | exocyst component 5 [Source:HGNC Symbol;Acc:10696]                                                                      | chr14 | 57670518  | 57735726  | 605           | 217      | 1        | 1         | 2.041E-02 | 4.069E-02 | PB-GT      |
| STGAL2        | STG beta-galactosidase alpha-2,6-sialyltransferase 2 [Source:HGNC Symbol;Acc:10861]                                     | chr2  | 107418056 | 107503564 | 589           | 217      | 1        | 1         | 2.042E-02 | 4.069E-02 | PB-GT      |
| RANBP2        | Ran binding protein 2 [Source:HGNC Symbol;Acc:9848]                                                                     | chr2  | 93933937  | 93972347  | 589           | 217      | 1        | 1         | 2.042E-02 | 4.069E-02 | PB-GT      |
| CRIL          | complement component (384b) receptor 1-like [Source:HGNC Symbol;Acc:2335]                                               | chr1  | 207818458 | 207911761 | 613           | 217      | 1        | 1         | 2.043E-02 | 4.069E-02 | PB-GT      |
| RCOR3         | REST corepressor 3 [Source:HGNC Symbol;Acc:25594]                                                                       | chr1  | 211431719 | 211489727 | 614           | 218      | 1        | 1         | 2.049E-02 | 4.078E-02 | PB-GT      |
| LSI43         | lysine-specific peptidase 43 [Source:HGNC Symbol;Acc:20072]                                                             | chr17 | 8648916   | 8653904   | 411           | 218      | 1        | 1         | 2.054E-02 | 4.081E-02 | PB-GT      |
| W51           | W51 homolog (S. cerevisiae) [Source:HGNC Symbol;Acc:25467]                                                              | chr2  | 128193783 | 128284462 | 591           | 218      | 1        | 1         | 2.055E-02 | 4.083E-02 | PB-GT      |
| ZC9H8         | zinc finger CCHC-type containing 9 [Source:HGNC Symbol;Acc:24762]                                                       | chr2  | 113035111 | 113097640 | 592           | 218      | 1        | 1         | 2.061E-02 | 4.093E-02 | PB-GT      |
| RAV1          | Rav binding protein, autoinhibitory (bNIN) associated with lethal yellow homolog (mouse) [Source:HGNC Symbol;Acc:15921] | chr2  | 92961452  | 92969114  | 588           | 219      | 1        | 1         | 2.062E-02 | 4.102E-02 | PB-GT      |
| MFSD1         | major facilitator superfamily domain containing 1 [Source:HGNC Symbol;Acc:25874]                                        | chr3  | 15844987  | 158547508 | 666           | 219      | 1        | 1         | 2.071E-02 | 4.105E-02 | PB-GT      |
| ANKRD30BL     | ankyrin repeat domain 30B-like [Source:HGNC Symbol;Acc:35167]                                                           | chr1  | 110385163 | 110385162 | 64            | 219      | 1        | 1         | 2.074E-02 | 4.109E-02 | PB-GT      |
| LIP           | lipase, member 1 [Source:HGNC Symbol;Acc:2517]                                                                          | chr21 | 15481134  | 15593186  | 866           | 219      | 1        | 1         | 2.078E-02 | 4.110E-02 | PB-GT      |
| F5BP          | fibrogen silencing binding protein [Source:HGNC Symbol;Acc:43633]                                                       | chr8  | 95390605  | 95449180  | 561           | 219      | 1        | 1         | 2.082E-02 | 4.119E-02 | PB-GT      |
| EFHC1         | EF-hand domain (C-terminal) containing 1 [Source:HGNC Symbol;Acc:16406]                                                 | chr16 | 12285166  | 12292782  | 62            | 220      | 1        | 1         | 2.090E-02 | 4.123E-02 | PB-GT      |
| ROCK2         | Rho-associated, coiled-coil containing protein kinase 2 [Source:HGNC Symbol;Acc:10252]                                  | chr2  | 11198887  | 11488465  | 1569          | 220      | 1        | 1         | 2.103E-02 | 4.154E-02 | PB-GT      |
| CCDC33        | coiled-coil domain containing 33 [Source:HGNC Symbol;Acc:25611]                                                         | chr2  | 11873054  | 118771709 | 599           | 221      | 1        | 1         | 2.107E-02 | 4.158E-02 | PB-GT      |
| ELL2          | elongation factor, RNA polymerase II 2 [Source:HGNC Symbol;Acc:17064]                                                   | chr2  | 95522802  | 95277975  | 677           | 221      | 1        | 1         | 2.111E-02 | 4.164E-02 | PB-GT      |
| ITGB8         | integrin, beta 8 [Source:HGNC Symbol;Acc:6163]                                                                          | chr7  | 20373225  | 20450419  | 662           | 221      | 1        | 1         | 2.115E-02 | 4.167E-02 | PB-GT      |
| B3GNT11       | UDP-GlcNAc 6-epiGal beta-1,3-N-acetylglucosaminyltransferase I [Source:HGNC Symbol;Acc:21277]                           | chr17 | 89000031  | 81099868  | 418           | 222      | 1        | 1         | 2.116E-02 | 4.171E-02 | PB-GT      |
| ESF1          | ESF1, nuclear proto-oncogene protein, homolog (S. cerevisiae) [Source:HGNC Symbol;Acc:15988]                            | chr20 | 13694969  | 13765833  | 592           | 222      | 1        | 1         | 2.123E-02 | 4.171E-02 | PB-GT      |
| ZNF131        | zinc finger protein 131 [Source:HGNC Symbol;Acc:12915]                                                                  | chr5  | 43065728  | 43192123  | 619           | 222      | 1        | 1         | 2.123E-02 | 4.174E-02 | PB-GT      |
| PARN          | poly(A)-specific ribonuclease [Source:HGNC Symbol;Acc:8609]                                                             | chr16 | 14529558  | 14726585  | 1347          | 222      | 2        | 2         | 2.124E-02 | 4.174E-02 | PB-GT      |
| ADMRE2        | ADM-related domain 2 [Source:HGNC Symbol;Acc:227]                                                                       | chr16 | 1229701   | 1178870   | 2408          | 222      | 1        | 1         | 2.128E-02 | 4.175E-02 | PB-GT      |
| ST3GAL6       | ST3 beta-galactosidase alpha-2,6-sialyltransferase 6 [Source:HGNC Symbol;Acc:18080]                                     | chr3  | 98451080  | 98540405  | 676           | 222      | 1        | 1         | 2.129E-02 | 4.175E-02 | PB-GT      |
| SPEN          | spen homolog, transcriptional regulator (Drosophila) [Source:HGNC Symbol;Acc:17575]                                     | chr1  | 16174359  | 16266955  | 627           | 222      | 1        | 1         | 2.131E-02 | 4.175E-02 | PB-GT      |
| EIF2AK3       | eukaryotic translation initiation factor 2-alpha kinase 3 [Source:HGNC Symbol;Acc:32325]                                | chr8  | 9395259   | 93991394  | 602           | 222      | 1        | 1         | 2.132E-02 | 4.175E-02 | PB-GT      |
| TDPI          | tyrosyl-DNA phosphodiesterase 1 [Source:HGNC Symbol;Acc:18884]                                                          | chr14 | 90421283  | 90511106  | 620           | 222      | 1        | 1         | 2.136E-02 | 4.175E-02 | PB-GT      |
| SEC23A        | Sec23 homolog A (S. cerevisiae) [Source:HGNC Symbol;Acc:10701]                                                          | chr14 | 39501123  | 39578850  | 620           | 222      | 1        | 1         | 2.136E-02 | 4.175E-02 | PB-GT      |
| COH1T         | cohesin 1, L1 (catheterin) [Source:HGNC Symbol;Acc:1756]                                                                | chr1  | 9313398   | 9315487   | 623           | 223      | 1        | 1         | 2.138E-02 | 4.175E-02 | PB-GT      |
| TLX1          | transducin (beta)-like 1X-linked [Source:HGNC Symbol;Acc:11585]                                                         | chrX  | 943135    | 968780    | 1336          | 223      | 1        | 1         | 2.139E-02 | 4.175E-02 | PB-GT      |
| LRG1          | leucine-rich repeat and immunoglobulin-like domains 1 [Source:HGNC Symbol;Acc:17360]                                    | chr3  | 68429221  | 68551887  | 678           | 223      | 1        | 1         | 2.141E-02 | 4.175E-02 | PB-GT      |
| GLYAT         | glycyl-tRNA synthetase, alpha [Source:HGNC Symbol;Acc:9774]                                                             | chr1  | 69407899  | 69494947  | 612           | 223      | 1        | 1         | 2.143E-02 | 4.175E-02 | PB-GT      |
| UBE2R2        | ubiquitin-conjugating enzyme E2R 2 [Source:HGNC Symbol;Acc:19907]                                                       | chr9  | 33817565  | 33920402  | 680           | 223      | 1        | 1         | 2.143E-02 | 4.176E-02 | PB-GT      |
| NUP214        | nucleoporin 214kDa [Source:HGNC Symbol;Acc:9064]                                                                        | chr9  | 13400048  | 134110057 | 681           | 223      | 1        | 1         | 2.149E-02 | 4.181E-02 | PB-GT      |
| FLT1D         | fibroblast growth factor receptor tyrosine kinase 10 (alpha 1, 3) [Source:HGNC Symbol;Acc:19234]                        | chr2  | 13252844  | 13300340  | 561           | 223      | 1        | 1         | 2.152E-02 | 4.181E-02 | PB-GT      |
| HVEP2         | human immunodeficiency virus type 1 enhancer binding protein 2 [Source:HGNC Symbol;Acc:4921]                            | chr6  | 143072604 | 143268338 | 1651          | 224      | 2        | 2         | 2.152E-02 | 4.181E-02 | PB-GT      |
| PPP3CA        | protein phosphatase 3, catalytic subunit, alpha isoform [Source:HGNC Symbol;Acc:9314]                                   | chr4  | 19184866  | 19206395  | 3174          | 224      | 3        | 3         | 2.152E-02 | 4.181E-02 | PB-GT      |
| PCBP1-AS1     | PCBP1 antisense RNA 1 [Source:HGNC Symbol;Acc:94948]                                                                    | chr2  | 70189395  | 70315978  | 607           | 224      | 1        | 1         | 2.156E-02 | 4.185E-02 | PB-GT      |
| HRA           | HFR hantone cell cycle regulation defective homolog A (S. cerevisiae) [Source:HGNC Symbol;Acc:4916]                     | chr22 | 19318221  | 19435224  | 530           | 224      | 1        | 1         | 2.160E-02 | 4.185E-02 | PB-GT      |
| MAP6P8        | microtubule-associated protein 6 [Source:HGNC Symbol;Acc:8974]                                                          | chr1  | 15244203  | 15256495  | 609           | 224      | 1        | 1         | 2.162E-02 | 4.185E-02 | PB-GT      |
| CAPZB         | capping protein (actin filament) muscle Z-line, beta [Source:HGNC Symbol;Acc:1491]                                      | chr1  | 19652627  | 19812066  | 632           | 224      | 1        | 1         | 2.162E-02 | 4.185E-02 | PB-GT      |
| LINC00087     | long intergenic non-protein coding RNA 607 [Source:HGNC Symbol;Acc:43944]                                               | chr2  | 216476286 | 216709445 | 1586          | 225      | 2        | 2         | 2.163E-02 | 4.185E-02 | PB-GT      |
| MSF           | myosin basic protein [Source:HGNC Symbol;Acc:9525]                                                                      | chr16 | 14959783  | 14984639  | 602           | 225      | 1        | 1         | 2.175E-02 | 4.200E-02 | PB-GT      |
| PPM1D         | protein phosphatase, Mg <sup>2+</sup> /Mn <sup>2+</sup> dependent, 1D [Source:HGNC Symbol;Acc:9277]                     | chr7  | 58877544  | 58741849  | 424           | 225      | 1        | 1         | 2.176E-02 | 4.205E-02 | PB-GT      |
| ZNFH3         | zinc finger homeobox 3 [Source:HGNC Symbol;Acc:777]                                                                     | chr16 | 72816784  | 73093597  | 1360          | 225      | 2        | 2         | 2.176E-02 | 4.205E-02 | PB-GT      |
| MON2          | MON2 homolog (S. cerevisiae) [Source:HGNC Symbol;Acc:29177]                                                             | chr2  | 62965927  | 62973963  | 1329          | 225      | 1        | 1         | 2.176E-02 | 4.205E-02 | PB-GT      |
| KRAS          | v-K-ras2 Kirsten rat sarcoma viral oncogene homolog [Source:HGNC Symbol;Acc:6407]                                       | chr12 | 25357723  | 25403870  | 510           | 225      | 1        | 1         | 2.183E-02 | 4.209E-02 | PB-GT      |
| AP2B1         | adaptor-related protein complex 2, beta 1                                                                               |       |           |           |               |          |          |           |           |           |            |

**Table S1. Genes with significant transposon integrations in DLD-1 KRAS<sup>G12V</sup> cells after selection in low glucose medium.**

| Gene ID   | Description                                                                                                 | Chrom | Start     | End       | # TTAAs sites | Expected | Observed | Libraries | P         | FDR       | Transposon |
|-----------|-------------------------------------------------------------------------------------------------------------|-------|-----------|-----------|---------------|----------|----------|-----------|-----------|-----------|------------|
| TEX36     | testis expressed 36 [Source:HGNC Symbol;Acc:31663]                                                          | chr10 | 127265091 | 127377113 | 573           | 247      | 1        | 1         | 2.587E-02 | 4.703E-02 | PB-GT      |
| ERN1      | endoplasmic reticulum to nucleus signaling 1 [Source:HGNC Symbol;Acc:3440]                                  | chr17 | 62123553  | 62127200  | 467           | 247      | 1        | 1         | 2.601E-02 | 4.724E-02 | PB-GT      |
| ETV6      | ets variant 6 [Source:HGNC Symbol;Acc:3495]                                                                 | chr12 | 11802788  | 12044558  | 1425          | 249      | 1        | 1         | 2.606E-02 | 4.731E-02 | PB-GT      |
| TOX2      | TOX high mobility group box family member 2 [Source:HGNC Symbol;Acc:16095]                                  | chr20 | 42543492  | 42986256  | 667           | 249      | 1        | 1         | 2.610E-02 | 4.734E-02 | PB-GT      |
| WWC1      | Wnt2 CD2 domain containing 1 [Source:HGNC Symbol;Acc:24352]                                                 | chr5  | 47171866  | 47187909  | 762           | 249      | 1        | 1         | 2.627E-02 | 4.761E-02 | PB-GT      |
| LINC00616 | long intergenic non-protein coding RNA 616 [Source:HGNC Symbol;Acc:44065]                                   | chr4  | 139848576 | 139951863 | 760           | 249      | 1        | 1         | 2.630E-02 | 4.761E-02 | PB-GT      |
| TNPO3     | transportin 3 [Source:HGNC Symbol;Acc:17103]                                                                | chr7  | 12859488  | 128695186 | 745           | 249      | 1        | 1         | 2.630E-02 | 4.761E-02 | PB-GT      |
| AKAP12    | A kinase (PKA) anchor protein 12 [Source:HGNC Symbol;Acc:370]                                               | chr5  | 15158134  | 15179692  | 707           | 250      | 1        | 1         | 2.646E-02 | 4.766E-02 | PB-GT      |
| BTBD10    | BTB (POZ) domain containing 10 [Source:HGNC Symbol;Acc:21445]                                               | chr11 | 13409548  | 13484844  | 687           | 250      | 1        | 1         | 2.650E-02 | 4.791E-02 | PB-GT      |
| ZBTB44    | zinc finger and BTB domain containing 44 [Source:HGNC Symbol;Acc:25001]                                     | chr11 | 130066572 | 130184831 | 689           | 251      | 1        | 1         | 2.664E-02 | 4.812E-02 | PB-GT      |
| GFPT3TC   | G protein-coupled receptor 137C [Source:HGNC Symbol;Acc:24445]                                              | chr14 | 53018656  | 53104431  | 699           | 251      | 1        | 1         | 2.665E-02 | 4.812E-02 | PB-GT      |
| ANXA4     | annexin A4 [Source:HGNC Symbol;Acc:542]                                                                     | chr2  | 69947523  | 70035596  | 682           | 251      | 1        | 1         | 2.677E-02 | 4.829E-02 | PB-GT      |
| NDUFA12   | NADH dehydrogenase (ubiquinone) 1 alpha subcomplex, 12 [Source:HGNC Symbol;Acc:23987]                       | chr12 | 95298331  | 95391246  | 570           | 252      | 1        | 1         | 2.680E-02 | 4.831E-02 | PB-GT      |
| WASF1     | WASP protein family member 1 [Source:HGNC Symbol;Acc:2732]                                                  | chr5  | 10421022  | 110911207 | 712           | 252      | 1        | 1         | 2.682E-02 | 4.831E-02 | PB-GT      |
| EP300     | E1A binding protein p300 [Source:HGNC Symbol;Acc:3373]                                                      | chr22 | 41487790  | 41576081  | 598           | 252      | 1        | 1         | 2.698E-02 | 4.856E-02 | PB-GT      |
| FLRT2     | fibronectin leucine rich transmembrane protein 2 [Source:HGNC Symbol;Acc:3761]                              | chr18 | 85984488  | 86093034  | 704           | 253      | 1        | 1         | 2.701E-02 | 4.856E-02 | PB-GT      |
| ZNF420    | zinc finger protein 420 [Source:HGNC Symbol;Acc:20648]                                                      | chr19 | 37669759  | 37921216  | 735           | 253      | 1        | 1         | 2.701E-02 | 4.856E-02 | PB-GT      |
| SH3TC2    | SH3 domain and tetrahydropteridine repeat 2 [Source:HGNC Symbol;Acc:29427]                                  | chr5  | 14830302  | 148442726 | 774           | 253      | 1        | 1         | 2.703E-02 | 4.856E-02 | PB-GT      |
| LINC02090 | long intergenic non-protein coding RNA 2090 [Source:HGNC Symbol;Acc:38515]                                  | chr4  | 181985242 | 182008302 | 774           | 254      | 1        | 1         | 2.719E-02 | 4.862E-02 | PB-GT      |
| GPATCH2L  | G patch domain containing 2-like [Source:HGNC Symbol;Acc:20210]                                             | chr14 | 70618259  | 70726885  | 707           | 254      | 1        | 1         | 2.722E-02 | 4.883E-02 | PB-GT      |
| SLC8A3    | solute carrier family 8 (sodium/calcium exchanger), member 3 [Source:HGNC Symbol;Acc:11070]                 | chr14 | 70510934  | 70655787  | 708           | 254      | 1        | 1         | 2.729E-02 | 4.892E-02 | PB-GT      |
| VT        | vitronectin [Source:HGNC Symbol;Acc:2897]                                                                   | chr3  | 39923833  | 3991925   | 691           | 255      | 1        | 1         | 2.742E-02 | 4.913E-02 | PB-GT      |
| SYNCRIP   | synaptotagmin binding, cytoplasmic RNA interacting protein [Source:HGNC Symbol;Acc:16918]                   | chr6  | 86267696  | 86353510  | 721           | 255      | 1        | 1         | 2.745E-02 | 4.913E-02 | PB-GT      |
| CHST9     | carboxylate (N-acetylglucosamine 4-O) sulfotransferase 9 [Source:HGNC Symbol;Acc:19898]                     | chr18 | 24455595  | 24755281  | 2007          | 246      | 2        | 2         | 2.749E-02 | 4.917E-02 | PB-GT      |
| KIAA1377  | KIAA1377 [Source:HGNC Symbol;Acc:28284]                                                                     | chr11 | 101785746 | 101791789 | 701           | 255      | 1        | 1         | 2.755E-02 | 4.939E-02 | PB-GT      |
| NHLRC2    | NHL repeat containing 2 [Source:HGNC Symbol;Acc:24731]                                                      | chr10 | 115614420 | 115678953 | 593           | 255      | 1        | 1         | 2.755E-02 | 4.939E-02 | PB-GT      |
| ARL15     | ADP-ribosylation factor-like 15 [Source:HGNC Symbol;Acc:29545]                                              | chr5  | 5317975   | 53064142  | 3445          | 125      | 3        | 2         | 2.762E-02 | 4.931E-02 | PB-GT      |
| SLC22A4   | solute carrier family 24 (sodium/potassium/calcium exchanger), member 4 [Source:HGNC Symbol;Acc:10978]      | chr14 | 62789255  | 6296256   | 715           | 257      | 1        | 1         | 2.775E-02 | 4.937E-02 | PB-GT      |
| FRMPD2    | FERM and PDZ domain containing 2 [Source:HGNC Symbol;Acc:28572]                                             | chr10 | 49364601  | 49482941  | 596           | 257      | 1        | 1         | 2.781E-02 | 4.958E-02 | PB-GT      |
| MARPK1    | mitogen-activated protein kinase kinase kinase 1, E3 ubiquitin protein ligase [Source:HGNC Symbol;Acc:6848] | chr5  | 5611401   | 56191979  | 787           | 257      | 1        | 1         | 2.787E-02 | 4.966E-02 | PB-GT      |
| YTHDC2    | YTH domain containing 2 [Source:HGNC Symbol;Acc:24721]                                                      | chr1  | 12949380  | 12955628  | 798           | 258      | 1        | 1         | 2.794E-02 | 4.970E-02 | PB-GT      |
| C6orf106  | chromosome 6 open reading frame 106 [Source:HGNC Symbol;Acc:21215]                                          | chr6  | 34555508  | 34664638  | 728           | 257      | 1        | 1         | 2.794E-02 | 4.970E-02 | PB-GT      |
| ZNF562    | zinc finger protein 562 [Source:HGNC Symbol;Acc:29147]                                                      | chr17 | 47366568  | 47439635  | 486           | 258      | 1        | 1         | 2.798E-02 | 4.975E-02 | PB-GT      |
| PROM1     | PROM1 containing 6 [Source:HGNC Symbol;Acc:3300]                                                            | chr5  | 22424816  | 22529745  | 789           | 258      | 1        | 1         | 2.800E-02 | 4.975E-02 | PB-GT      |
| MCC1      | metastasis associated in colon cancer 1 [Source:HGNC Symbol;Acc:30215]                                      | chr7  | 20174278  | 20257027  | 772           | 258      | 1        | 1         | 2.808E-02 | 4.984E-02 | PB-GT      |
| RFPL      | ring finger and FYVE-like domain containing E3 ubiquitin protein ligase [Source:HGNC Symbol;Acc:24821]      | chr17 | 33333009  | 33416338  | 467           | 258      | 1        | 1         | 2.809E-02 | 4.984E-02 | PB-GT      |
| RBMXP1    | RBMXP1 protein family member 1 [Source:HGNC Symbol;Acc:2911]                                                | chr8  | 4181340   | 4183856   | 715           | 257      | 1        | 1         | 2.809E-02 | 4.984E-02 | PB-GT      |
| LY8E      | lymphocyte antigen 6 complex, locus E [Source:HGNC Symbol;Acc:6727]                                         | chr8  | 14404939  | 144105249 | 7             | 0001     | 1        | 1         | 2.809E-02 | 4.984E-02 | PB-GT      |
| ALPK2     | alpha-ketoglutarate-dependent protein kinase 2 [Source:HGNC Symbol;Acc:11888]                               | chr18 | 56148479  | 56301189  | 777           | 0051     | 3        | 1         | 2.826E-02 | 5.015E-02 | PB-CAGSD   |
| PTGES2    | prostaglandin G/H synthase 2 [Source:HGNC Symbol;Acc:1752]                                                  | chr19 | 69410308  | 69415386  | 14            | 0001     | 1        | 1         | 2.826E-02 | 5.015E-02 | PB-CAGSD   |
| DLGAP1    | DLGAP1 (Drosophila) homolog-associated protein 1 [Source:HGNC Symbol;Acc:2905]                              | chr20 | 49457152  | 49462286  | 11            | 0001     | 1        | 1         | 2.826E-02 | 5.015E-02 | PB-CAGSD   |
| ABHD11    | abhydrolase domain containing 11 [Source:HGNC Symbol;Acc:16407]                                             | chr10 | 13062629  | 13082574  | 47            | 0002     | 1        | 1         | 2.826E-02 | 5.015E-02 | PB-CAGSD   |
| RNLSL27BP | RNA, TSL, cytoskeletal 27B, pseudogene [Source:HGNC Symbol;Acc:46294]                                       | chr7  | 73150424  | 73159187  | 18            | 0001     | 1        | 1         | 2.826E-02 | 5.015E-02 | PB-CAGSD   |
| KRC1      | lysine-rich coiled-coil 1 [Source:HGNC Symbol;Acc:28039]                                                    | chr2  | 68357224  | 68360248  | 242           | 0017     | 2        | 2         | 2.826E-02 | 5.015E-02 | PB-CAGSD   |
| MIR4514   | microRNA 4514 [Source:HGNC Symbol;Acc:41966]                                                                | chr1  | 81289758  | 81294814  | 18            | 0001     | 1        | 1         | 2.826E-02 | 5.015E-02 | PB-CAGSD   |
| KRT19P23  | keratin 19 pseudogene 23 [Source:HGNC Symbol;Acc:33375]                                                     | chr15 | 72711586  | 72717792  | 15            | 0001     | 1        | 1         | 2.826E-02 | 5.015E-02 | PB-CAGSD   |
| PKN3      | protein kinase N3 [Source:HGNC Symbol;Acc:17959]                                                            | chr9  | 131459802 | 131483197 | 25            | 0001     | 1        | 1         | 2.826E-02 | 5.015E-02 | PB-CAGSD   |
| RNU6-363P | RNA, U6 small nuclear 6S3, pseudogene [Source:HGNC Symbol;Acc:47526]                                        | chr20 | 46117222  | 46126829  | 19            | 0002     | 1        | 1         | 2.826E-02 | 5.015E-02 | PB-CAGSD   |
| RNF1      | ring finger protein 1 [Source:HGNC Symbol;Acc:18084]                                                        | chr6  | 30032043  | 30034864  | 27            | 0002     | 1        | 1         | 2.826E-02 | 5.015E-02 | PB-CAGSD   |
| BCAS4     | breast carcinoma amplified sequence 4 [Source:HGNC Symbol;Acc:14367]                                        | chr20 | 49406431  | 49493714  | 248           | 0021     | 2        | 2         | 2.826E-02 | 5.015E-02 | PB-CAGSD   |
| ASPG      | asparaginase 1 (S. cerevisiae) [Source:HGNC Symbol;Acc:20123]                                               | chr14 | 104547016 | 104579098 | 27            | 0002     | 1        | 1         | 2.826E-02 | 5.015E-02 | PB-CAGSD   |
| TTG8      | transposase repeat domain 8 [Source:HGNC Symbol;Acc:26395]                                                  | chr15 | 40721965  | 40787246  | 15            | 0002     | 1        | 1         | 2.826E-02 | 5.015E-02 | PB-CAGSD   |
| MIR4779   | microRNA 4779 [Source:HGNC Symbol;Acc:41747]                                                                | chr2  | 86420149  | 86423231  | 21            | 0002     | 1        | 1         | 2.826E-02 | 5.015E-02 | PB-CAGSD   |
| RNF5      | ring finger protein 5, E3 ubiquitin protein ligase [Source:HGNC Symbol;Acc:10068]                           | chr6  | 3214131   | 32151930  | 31            | 0002     | 1        | 1         | 2.826E-02 | 5.015E-02 | PB-CAGSD   |
| RNAP52    | RNA polymerase II subunit 52 [Source:HGNC Symbol;Acc:42966]                                                 | chr1  | 2292487   | 2293946   | 59            | 0002     | 1        | 1         | 2.826E-02 | 5.015E-02 | PB-CAGSD   |
| DNAG1     | DNAJ (Hsp40) homolog, subfamily C, member 28 [Source:HGNC Symbol;Acc:1297]                                  | chr21 | 34860497  | 34869027  | 38            | 0002     | 1        | 1         | 2.826E-02 | 5.015E-02 | PB-CAGSD   |
| MRLP40P1  | mitochondrial ribosomal protein L40 pseudogene 1 [Source:HGNC Symbol;Acc:44532]                             | chr12 | 6740216   | 67455819  | 36            | 0002     | 1        | 1         | 2.826E-02 | 5.015E-02 | PB-CAGSD   |
| RNLSL10B  | RNA, TSL, cytoskeletal 10B, pseudogene [Source:HGNC Symbol;Acc:46124]                                       | chr1  | 76247757  | 76252535  | 33            | 0002     | 1        | 1         | 2.826E-02 | 5.015E-02 | PB-CAGSD   |
| SNORD54C  | small nuclear RNA, CID box 45C [Source:HGNC Symbol;Acc:32720]                                               | chr1  | 5924645   | 5924785   | 33            | 0002     | 1        | 1         | 2.826E-02 | 5.015E-02 | PB-CAGSD   |
| JUN       | jun proto-oncogene [Source:HGNC Symbol;Acc:6204]                                                            | chr1  | 74113707  | 7417870   | 32            | 0002     | 1        | 1         | 2.826E-02 | 5.015E-02 | PB-CAGSD   |
| MIR684    | microRNA 684 [Source:HGNC Symbol;Acc:41558]                                                                 | chr15 | 81282825  | 81296342  | 32            | 0002     | 1        | 1         | 2.826E-02 | 5.015E-02 | PB-CAGSD   |
| MEIS1     | mesoderm development candidate 1 [Source:HGNC Symbol;Acc:13519]                                             | chr1  | 76248574  | 7625367   | 34            | 0002     | 1        | 1         | 2.826E-02 | 5.015E-02 | PB-CAGSD   |
| SNORD54A  | small nuclear RNA, CID box 45A [Source:HGNC Symbol;Acc:10184]                                               | chr14 | 2292487   | 2293946   | 59            | 0002     | 1        | 1         | 2.826E-02 | 5.015E-02 | PB-CAGSD   |
| CARFDP2   | carbamoyl phosphate dependent dehydrogenase pseudogene 2 [Source:HGNC Symbol;Acc:37781]                     | chr14 | 2292487   | 2293946   | 59            | 0002     | 1        | 1         | 2.826E-02 | 5.015E-02 | PB-CAGSD   |
| TRAJ17    | T cell receptor alpha joining 17 [Source:HGNC Symbol;Acc:12045]                                             | chr14 | 2292487   | 2293946   | 59            | 0002     | 1        | 1         | 2.826E-02 | 5.015E-02 | PB-CAGSD   |
| CCL24     | chemokine (C-C motif) ligand 24 [Source:HGNC Symbol;Acc:10623]                                              | chr7  | 54450982  | 54455874  | 47            | 0002     | 1        | 1         | 2.826E-02 | 5.015E-02 | PB-CAGSD   |
| PRR1L     | proline rich 1-like [Source:HGNC Symbol;Acc:28148]                                                          | chr17 | 46023333  | 46049244  | 29            | 0003     | 1        | 1         | 2.826E-02 | 5.015E-02 | PB-CAGSD   |
| ACR       | actin [Source:HGNC Symbol;Acc:126]                                                                          | chr22 | 51171624  | 51183762  | 29            | 0003     | 1        | 1         | 2.826E-02 | 5.015E-02 | PB-CAGSD   |
| RNAP52P2  | RNA polymerase II subunit 52 pseudogene 2 [Source:HGNC Symbol;Acc:43262]                                    | chr1  | 66454611  | 66458281  | 45            | 0003     | 1        | 1         | 2.826E-02 | 5.015E-02 | PB-CAGSD   |
| UBAC2-AS1 | UBAC2 antisense RNA 1 [Source:HGNC Symbol;Acc:42502]                                                        | chr13 | 9984831   | 9985794   | 47            | 0003     | 1        | 1         | 2.826E-02 | 5.015E-02 | PB-CAGSD   |
| AGPAT1    | 1-acylglycerol 3-phosphate O-acyltransferase 1 [Source:HGNC Symbol;Acc:324]                                 | chr6  | 3215989   | 32150873  | 47            | 0003     | 1        | 1         | 2.826E-02 | 5.015E-02 | PB-CAGSD   |
| TRA15     | T cell receptor alpha joining 15 [Source:HGNC Symbol;Acc:12043]                                             | chr14 | 2292487   | 2293946   | 60            | 0003     | 1        | 1         | 2.826E-02 | 5.015E-02 | PB-CAGSD   |
| HOKA1     | homeobox A1 [Source:HGNC Symbol;Acc:5096]                                                                   | chr7  | 27132612  | 27140615  | 42            | 0003     | 1        | 1         | 2.826E-02 | 5.015E-02 | PB-CAGSD   |
| RNU17-63P | RNA, U17 small nuclear 63 pseudogene [Source:HGNC Symbol;Acc:45697]                                         | chr10 | 1088233   | 1089326   | 33            | 0003     | 1        | 1         | 2.826E-02 | 5.015E-02 | PB-CAGSD   |
| TRA16     | T cell receptor alpha joining 16 [Source:HGNC Symbol;Acc:12044]                                             | chr14 | 2292487   | 2293946   | 51            | 0003     | 1        | 1         | 2.826E-02 | 5.015E-02 | PB-CAGSD   |
| TRA14     | T cell receptor alpha joining 14 [Source:HGNC Symbol;Acc:12042]                                             | chr14 | 2292487   | 2293946   | 32            | 0003     | 1        | 1         | 2.826E-02 | 5.015E-02 | PB-CAGSD   |
| VPB18     | vacuolar protein sorting 18 homolog (S. cerevisiae) [Source:HGNC Symbol;Acc:15972]                          | chr15 | 41181628  | 41199173  | 39            | 0003     | 1        | 1         | 2.826E-02 | 5.015E-02 | PB-CAGSD   |
| SNORD5B   | small nuclear RNA, CID box 45B [Source:HGNC Symbol;Acc:10185]                                               | chr15 | 2592162   | 2593233   | 43            | 0003     | 1        | 1         | 2.826E-02 | 5.015E-02 | PB-CAGSD   |
| SHCBP1    | SH3 SH2 domain binding protein 1 [Source:HGNC Symbol;Acc:29547]                                             | chr16 | 46614466  | 46660538  | 315           | 0003     | 2        | 2         |           |           |            |

Table S1. Genes with significant transposon integrations in DLD-1 KRAS<sup>G12V</sup> cells after selection in low glucose medium.

| Gene ID                                          | Description                                                                                              | Chrom | Start     | End       | # TTAAs sites | Expected | Observed | Libraries | P         | FDR       | Transposon |
|--------------------------------------------------|----------------------------------------------------------------------------------------------------------|-------|-----------|-----------|---------------|----------|----------|-----------|-----------|-----------|------------|
| PLN2                                             | perilin 2 [Source:HGNC Symbol;Acc:248]                                                                   | chr9  | 19108373  | 19154288  | 187           | 0.011    | 1        | 1         | 6.019E-05 | 3.300E-04 | PB-CAG-SG  |
| SKAP1                                            | src family associated tyrosine kinase 1 [Source:HGNC Symbol;Acc:15605]                                   | chr17 | 46210802  | 46457197  | 2302          | 0.011    | 1        | 1         | 6.054E-05 | 3.300E-04 | PB-CAG-SG  |
| ART4                                             | ADP-ribosyltransferase 4 (Dombrock blood group) [Source:HGNC Symbol;Acc:726]                             | chr12 | 14978503  | 15001429  | 195           | 0.011    | 1        | 1         | 6.199E-05 | 3.444E-04 | PB-CAG-SG  |
| SOX13                                            | SRY (sex determining region Y)-box 13 [Source:HGNC Symbol;Acc:11192]                                     | chr1  | 20403743  | 20409863  | 166           | 0.012    | 1        | 1         | 6.370E-05 | 3.606E-04 | PB-CAG-SG  |
| CIAPIN1                                          | cytokine inducible apoptosis inhibitor 1 [Source:HGNC Symbol;Acc:28596]                                  | chr1  | 37462205  | 37494840  | 20            | 0.012    | 1        | 1         | 6.593E-05 | 3.731E-04 | PB-CAG-SG  |
| CD37                                             | cell division cycle 37 [Source:HGNC Symbol;Acc:1735]                                                     | chr9  | 10501810  | 10535797  | 96            | 0.012    | 1        | 1         | 6.653E-05 | 3.810E-04 | PB-CAG-SG  |
| MSMO1                                            | methylsterol monooxygenase 1 [Source:HGNC Symbol;Acc:10545]                                              | chr4  | 16624375  | 166264312 | 211           | 0.012    | 1        | 1         | 7.287E-05 | 3.924E-04 | PB-CAG-SG  |
| ZNFX3                                            | zinc finger protein 630 [Source:HGNC Symbol;Acc:28865]                                                   | chrX  | 47842756  | 47938925  | 484           | 0.012    | 1        | 1         | 7.543E-05 | 4.033E-04 | PB-CAG-SG  |
| SF3A3                                            | splicing factor 3a, subunit 3, 60kDa [Source:HGNC Symbol;Acc:10767]                                      | chr1  | 38422647  | 38461593  | 179           | 0.012    | 1        | 1         | 7.679E-05 | 4.031E-04 | PB-CAG-SG  |
| ENP4                                             | ectonucleotide pyrophosphatase/phosphodiesterase 4 (putative) [Source:HGNC Symbol;Acc:33569]             | chr6  | 46922730  | 46114436  | 195           | 0.012    | 1        | 1         | 7.695E-05 | 4.031E-04 | PB-CAG-SG  |
| PODXL2                                           | podocalyxin-like 2 [Source:HGNC Symbol;Acc:7832]                                                         | chr3  | 12743204  | 12739152  | 188           | 0.013    | 1        | 1         | 8.083E-05 | 4.223E-04 | PB-CAG-SG  |
| COLEC11                                          | collectin sub-family member 11 [Source:HGNC Symbol;Acc:17213]                                            | chr2  | 3673426   | 3692048   | 184           | 0.013    | 1        | 1         | 8.220E-05 | 4.249E-04 | PB-CAG-SG  |
| POFDC2                                           | poysen domain containing 2 [Source:HGNC Symbol;Acc:17645]                                                | chr3  | 119355304 | 119389171 | 191           | 0.013    | 1        | 1         | 8.255E-05 | 4.249E-04 | PB-CAG-SG  |
| ASAP3                                            | ATP-GAP with SH3 domain, ankyrin repeat and PH domain 3 [Source:HGNC Symbol;Acc:14987]                   | chr1  | 23755056  | 23815689  | 187           | 0.013    | 1        | 1         | 8.302E-05 | 4.255E-04 | PB-CAG-SG  |
| CRHBP                                            | corticotropin releasing hormone binding protein [Source:HGNC Symbol;Acc:2356]                            | chr5  | 76243538  | 76276883  | 203           | 0.013    | 1        | 1         | 8.586E-05 | 4.355E-04 | PB-CAG-SG  |
| ERRF1                                            | ERBB receptor feedback inhibitor 1 [Source:HGNC Symbol;Acc:18165]                                        | chr1  | 8904444   | 8913898   | 191           | 0.013    | 1        | 1         | 8.687E-05 | 4.375E-04 | PB-CAG-SG  |
| STAR4                                            | STAR-related lipid transfer (START) domain containing 4 [Source:HGNC Symbol;Acc:18058]                   | chr5  | 110831731 | 110863298 | 212           | 0.014    | 1        | 1         | 9.365E-05 | 4.656E-04 | PB-CAG-SG  |
| WD repeat domain, phosphoinositide interacting 2 | WD repeat domain, phosphoinositide interacting 2 [Source:HGNC Symbol;Acc:32225]                          | chr7  | 5224819   | 5273457   | 219           | 0.014    | 1        | 1         | 9.384E-05 | 4.659E-04 | PB-CAG-SG  |
| LNCO210                                          | long interspersed non-protein coding RNA 710 [Source:HGNC Symbol;Acc:27366]                              | chr10 | 1069021   | 10699143  | 171           | 0.014    | 1        | 1         | 9.759E-05 | 4.798E-04 | PB-CAG-SG  |
| MDHB                                             | maleate dehydrogenase 1B, NAD (reducible) [Source:HGNC Symbol;Acc:17836]                                 | chr2  | 207602487 | 207635211 | 201           | 0.014    | 1        | 1         | 9.802E-05 | 4.798E-04 | PB-CAG-SG  |
| C6orf99                                          | chromosome 6 open reading frame 99 [Source:HGNC Symbol;Acc:21179]                                        | chr6  | 159295654 | 159331385 | 224           | 0.014    | 1        | 1         | 1.009E-04 | 4.869E-04 | PB-CAG-SG  |
| ABC23                                            | ATP-binding cassette, sub-family G (CFTR/MRP), member 23 [Source:HGNC Symbol;Acc:54]                     | chr2  | 97303474  | 97370624  | 205           | 0.014    | 1        | 1         | 1.019E-04 | 4.869E-04 | PB-CAG-SG  |
| FER1L5                                           | fer-1-like 5 (C. elegans) [Source:HGNC Symbol;Acc:19044]                                                 | chr9  | 21967751  | 22000300  | 244           | 0.014    | 1        | 1         | 1.022E-04 | 4.869E-04 | PB-CAG-SG  |
| CDKN2A                                           | cyclin-dependent kinase inhibitor 2A [Source:HGNC Symbol;Acc:1878]                                       | chr18 | 24034814  | 24232395  | 1354          | 0.087    | 2        | 1         | 1.041E-04 | 4.923E-04 | PB-CAG-SG  |
| KCTD1                                            | Kelch domain containing protein 1 [Source:HGNC Symbol;Acc:18249]                                         | chr2  | 26531041  | 26574885  | 208           | 0.015    | 1        | 1         | 1.046E-04 | 4.929E-04 | PB-CAG-SG  |
| GPR113                                           | G protein-coupled receptor 113 [Source:HGNC Symbol;Acc:18989]                                            | chr7  | 151033785 | 151075535 | 238           | 0.015    | 1        | 1         | 1.107E-04 | 5.168E-04 | PB-CAG-SG  |
| NUB1                                             | negative regulator of ubiquitin-like protein 1 [Source:HGNC Symbol;Acc:17623]                            | chr1  | 69453147  | 69469224  | 218           | 0.015    | 1        | 1         | 1.130E-04 | 5.264E-04 | PB-CAG-SG  |
| SLC18A2                                          | solute carrier family 18 (thiamine transporter), member 2 [Source:HGNC Symbol;Acc:10938]                 | chr2  | 113779668 | 113815444 | 219           | 0.015    | 1        | 1         | 1.163E-04 | 5.354E-04 | PB-CAG-SG  |
| IL38                                             | interleukin 36, beta [Source:HGNC Symbol;Acc:15564]                                                      | chr10 | 1063606   | 1060138   | 188           | 0.015    | 1        | 1         | 1.179E-04 | 5.391E-04 | PB-CAG-SG  |
| ID3-AS1                                          | ID3 antisense RNA 1 [Source:HGNC Symbol;Acc:30858]                                                       | chr19 | 19389827  | 19389827  | 1             | 0.015    | 1        | 1         | 1.186E-04 | 5.401E-04 | PB-CAG-SG  |
| SUCP1                                            | SURP and G patch domain containing 1 [Source:HGNC Symbol;Acc:18643]                                      | chr5  | 169005368 | 169031782 | 241           | 0.016    | 1        | 1         | 1.208E-04 | 5.456E-04 | PB-CAG-SG  |
| SPDL1                                            | spindle apparatus coiled-coil protein 1 [Source:HGNC Symbol;Acc:26010]                                   | chr7  | 56048910  | 56070020  | 178           | 0.016    | 1        | 1         | 1.223E-04 | 5.487E-04 | PB-CAG-SG  |
| VEP1                                             | vascular endothelial zinc finger 1 [Source:HGNC Symbol;Acc:12949]                                        | chr17 | 94271951  | 94271951  | 1             | 0.016    | 1        | 1         | 1.232E-04 | 5.498E-04 | PB-CAG-SG  |
| MFSD2B                                           | major facilitator superfamily domain containing 2B [Source:HGNC Symbol;Acc:37207]                        | chr17 | 4014462   | 4090095   | 187           | 0.017    | 1        | 1         | 1.346E-04 | 5.944E-04 | PB-CAG-SG  |
| CY8B2                                            | cytochrome b5 domain containing 2 [Source:HGNC Symbol;Acc:28471]                                         | chr16 | 3488611   | 3538963   | 172           | 0.017    | 1        | 1         | 1.350E-04 | 5.944E-04 | PB-CAG-SG  |
| NABO                                             | Naphthalene acetyltransferase 50, NAD <sup>+</sup> catalytic subunit [Source:HGNC Symbol;Acc:25875]      | chr2  | 23401592  | 23401592  | 1             | 0.017    | 1        | 1         | 1.350E-04 | 5.944E-04 | PB-CAG-SG  |
| RTDR1                                            | retinol dehydrogenase domain containing 1 [Source:HGNC Symbol;Acc:29536]                                 | chr15 | 42061632  | 42120053  | 231           | 0.017    | 1        | 1         | 1.426E-04 | 6.166E-04 | PB-CAG-SG  |
| MAPKBP1                                          | mitogen-activated protein kinase binding protein 1 [Source:HGNC Symbol;Acc:29536]                        | chr19 | 42172325  | 42195895  | 135           | 0.017    | 1        | 1         | 1.427E-04 | 6.166E-04 | PB-CAG-SG  |
| CEACAM7                                          | carcinoembryonic antigen-related cell adhesion molecule 7 [Source:HGNC Symbol;Acc:1819]                  | chr19 | 29819294  | 29829299  | 2             | 0.017    | 1        | 1         | 1.428E-04 | 6.166E-04 | PB-CAG-SG  |
| RNF16                                            | RUN and FYVE domain containing 1 [Source:HGNC Symbol;Acc:19760]                                          | chr5  | 17897259  | 179037027 | 271           | 0.018    | 1        | 1         | 1.525E-04 | 6.512E-04 | PB-CAG-SG  |
| RUFI1                                            | ATP-binding cassette, sub-family A (CFTR/MRP), member 8 [Source:HGNC Symbol;Acc:59]                      | chr1  | 17414432  | 17503440  | 288           | 0.018    | 1        | 1         | 1.530E-04 | 6.525E-04 | PB-CAG-SG  |
| ABC3                                             | ATP-binding cassette, sub-family A (CFTR/MRP), member 3 [Source:HGNC Symbol;Acc:59]                      | chr11 | 1260969   | 1266288   | 1728          | 1.100    | 2        | 2         | 1.566E-04 | 6.536E-04 | PB-CAG-SG  |
| TEAD1                                            | TEA domain family member 1 (D/val transcriptional enhancer) [Source:HGNC Symbol;Acc:11714]               | chr3  | 29305685  | 29327711  | 263           | 0.018    | 1        | 1         | 1.566E-04 | 6.536E-04 | PB-CAG-SG  |
| RBM35-AS3                                        | RBM35 antisense RNA 3 [Source:HGNC Symbol;Acc:30999]                                                     | chr11 | 11074865  | 11082322  | 260           | 0.018    | 1        | 1         | 1.605E-04 | 6.698E-04 | PB-CAG-SG  |
| KCNCA3                                           | potassium voltage-gated channel, Shaw-related class A, member 3 [Source:HGNC Symbol;Acc:6236]            | chr3  | 19357851  | 19358724  | 312           | 0.018    | 1        | 1         | 1.620E-04 | 6.709E-04 | PB-CAG-SG  |
| C10orf4                                          | chromosome 10 open reading frame 4 [Source:HGNC Symbol;Acc:26055]                                        | chr10 | 20202085  | 20232784  | 270           | 0.018    | 1        | 1         | 1.644E-04 | 6.766E-04 | PB-CAG-SG  |
| SGOL1                                            | shugoshin-like 1 (S. pombe) [Source:HGNC Symbol;Acc:25088]                                               | chr1  | 15164000  | 15168354  | 268           | 0.018    | 1        | 1         | 1.704E-04 | 6.904E-04 | PB-CAG-SG  |
| THEM4                                            | thapsigargin superfamily member 4 [Source:HGNC Symbol;Acc:17947]                                         | chr9  | 4430081   | 44336358  | 148           | 0.019    | 1        | 1         | 1.714E-04 | 6.974E-04 | PB-CAG-SG  |
| LYPLALR                                          | lysophosphatidyl alcohol acyltransferase 1 [Source:HGNC Symbol;Acc:26397]                                | chr4  | 12622524  | 12644087  | 1819          | 0.104    | 2        | 2         | 1.759E-04 | 7.113E-04 | PB-CAG-SG  |
| FAT4                                             | FAT apoliprotein candidate 4 [Source:HGNC Symbol;Acc:23109]                                              | chr1  | 84015811  | 84043348  | 373           | 0.019    | 1        | 1         | 1.768E-04 | 7.113E-04 | PB-CAG-SG  |
| TSC16                                            | tuberous sclerosis 16 homolog (S. cerevisiae) [Source:HGNC Symbol;Acc:16791]                             | chr4  | 56461396  | 56507865  | 333           | 0.019    | 1        | 1         | 1.807E-04 | 7.220E-04 | PB-CAG-SG  |
| NMU                                              | neuromedin U [Source:HGNC Symbol;Acc:7859]                                                               | chr2  | 178972151 | 179001531 | 274           | 0.019    | 1        | 1         | 1.815E-04 | 7.220E-04 | PB-CAG-SG  |
| RBM45                                            | RNA binding motif protein 45 [Source:HGNC Symbol;Acc:24488]                                              | chr13 | 10961820  | 10968831  | 363           | 0.019    | 1        | 1         | 1.881E-04 | 7.387E-04 | PB-CAG-SG  |
| UC18-AS1                                         | UC18 antisense RNA 1 [Source:HGNC Symbol;Acc:20068]                                                      | chr7  | 6139515   | 6201195   | 312           | 0.020    | 1        | 1         | 1.897E-04 | 7.387E-04 | PB-CAG-SG  |
| USP42                                            | ubiquitin specific peptidase 42 [Source:HGNC Symbol;Acc:20068]                                           | chr15 | 63363217  | 63801325  | 267           | 0.020    | 1        | 1         | 1.902E-04 | 7.387E-04 | PB-CAG-SG  |
| APHB                                             | APHB gamma secretase substrate [Source:HGNC Symbol;Acc:24080]                                            | chr7  | 92970235  | 92985438  | 291           | 0.020    | 1        | 1         | 1.971E-04 | 7.387E-04 | PB-CAG-SG  |
| TMEM10                                           | transmembrane protein 10 [Source:HGNC Symbol;Acc:30526]                                                  | chr15 | 59882074  | 59932438  | 268           | 0.020    | 1        | 1         | 1.916E-04 | 7.387E-04 | PB-CAG-SG  |
| GNCT3                                            | glucosylaminyl (N-acetyl) transferase 3, mucin type [Source:HGNC Symbol;Acc:4205]                        | chr3  | 52687137  | 52936378  | 292           | 0.020    | 1        | 1         | 1.921E-04 | 7.387E-04 | PB-CAG-SG  |
| TMEM10-MUSTN1                                    | TMEM10-MUSTN1 readthrough [Source:HGNC Symbol;Acc:38834]                                                 | chr3  | 51153807  | 51153807  | 1             | 0.020    | 1        | 1         | 1.921E-04 | 7.387E-04 | PB-CAG-SG  |
| ANKRD10                                          | ankyrin repeat domain 10 [Source:HGNC Symbol;Acc:17066]                                                  | chr14 | 23527773  | 23569823  | 227           | 0.020    | 1        | 1         | 1.951E-04 | 7.422E-04 | PB-CAG-SG  |
| ACIN1                                            | apoptotic chromatin condensation inducer 1 [Source:HGNC Symbol;Acc:17066]                                | chr3  | 52687137  | 52936378  | 292           | 0.020    | 1        | 1         | 1.921E-04 | 7.387E-04 | PB-CAG-SG  |
| ABCA3                                            | ATP-binding cassette, sub-family A (ABC1), member 3 [Source:HGNC Symbol;Acc:33]                          | chr11 | 31910585  | 31910585  | 1             | 0.020    | 1        | 1         | 1.970E-04 | 7.427E-04 | PB-CAG-SG  |
| FANF                                             | FANF2/AF2-associated nucleases 1 [Source:HGNC Symbol;Acc:20170]                                          | chr11 | 33762485  | 33801089  | 346           | 0.020    | 1        | 1         | 1.989E-04 | 7.446E-04 | PB-CAG-SG  |
| FBX03                                            | F-box protein 3 [Source:HGNC Symbol;Acc:11336]                                                           | chr9  | 15417702  | 15448955  | 350           | 0.021    | 1        | 1         | 2.095E-04 | 7.801E-04 | PB-CAG-SG  |
| SNAPC3                                           | small nuclear RNA activating complex, polycomb 3, 50kDa [Source:HGNC Symbol;Acc:11336]                   | chr9  | 6456298   | 6456298   | 329           | 0.021    | 1        | 1         | 2.095E-04 | 7.801E-04 | PB-CAG-SG  |
| ZNIF18                                           | zinc finger protein 138 [Source:HGNC Symbol;Acc:21087]                                                   | chr3  | 112182815 | 112223408 | 307           | 0.021    | 1        | 1         | 2.121E-04 | 7.814E-04 | PB-CAG-SG  |
| BTLA                                             | B and T lymphocyte associated [Source:HGNC Symbol;Acc:21087]                                             | chr1  | 19007427  | 19184765  | 816           | 0.021    | 1        | 1         | 2.132E-04 | 7.814E-04 | PB-CAG-SG  |
| GPR64                                            | G protein-coupled receptor 64 [Source:HGNC Symbol;Acc:516]                                               | chr2  | 43911128  | 44001550  | 392           | 0.021    | 1        | 1         | 2.202E-04 | 8.027E-04 | PB-CAG-SG  |
| CS37A1                                           | cytoskeleton specter family 37 (chromatin-6-phosphate transfer), member 1 [Source:HGNC Symbol;Acc:11024] | chr1  | 51669943  | 51739127  | 307           | 0.021    | 1        | 1         | 2.232E-04 | 8.097E-04 | PB-CAG-SG  |
| RNF11                                            | ring finger protein 11 [Source:HGNC Symbol;Acc:10066]                                                    | chr11 | 62475566  | 62495093  | 369           | 0.021    | 1        | 1         | 2.250E-04 | 8.156E-04 | PB-CAG-SG  |
| MBP20                                            | myelin basic protein 20 [Source:HGNC Symbol;Acc:17187]                                                   | chr1  | 10247596  | 10255183  | 369           | 0.021    | 1        | 1         | 2.250E-04 | 8.156E-04 | PB-CAG-SG  |
| ADAM10                                           | chondroitinase 1 [Source:HGNC Symbol;Acc:20189]                                                          | chr4  | 5736019   | 57965858  | 246           | 0.022    | 1        | 1         | 2.289E-04 | 8.179E-04 | PB-CAG-SG  |
| ADCY3                                            | adenylyl cyclase 3 [Source:HGNC Symbol;Acc:234]                                                          | chr2  | 25042038  | 25147708  | 308           | 0.022    | 1        | 1         | 2.290E-04 | 8.179E-04 | PB-CAG-SG  |
| ADCY7                                            | adenylyl cyclase 7 [Source:HGNC Symbol;Acc:24157]                                                        | chr1  | 6334333   | 63384951  | 513           | 0.022    | 1        | 1         | 2.320E-04 | 8.264E-04 | PB-CAG-SG  |
| RNMT                                             | RNA guanylylase 7 [Source:HGNC Symbol;Acc:10075]                                                         | chr18 | 13721659  | 13764557  | 334           | 0.022    | 1        | 1         | 2.358E-04 | 8.335E-04 | PB-CAG-SG  |
| UGT3A1                                           | UDP-glucosyltransferase 3 family, polypeptide A1 [Source:HGNC Symbol;Acc:26625]                          | chr5  | 35951112  | 36006130  | 341           | 0.022    | 1        | 1         | 2.408E-04 | 8.462E-04 | PB-CAG-SG  |
| ZNFS47                                           | zinc finger protein 347 [Source:HGNC Symbol;Acc:16443]                                                   | chr19 | 46272325  | 46298728  | 76            | 0.022    | 1        | 1         | 2.408E-04 | 8.462E-04 | PB-CAG-SG  |
| ZNF71                                            |                                                                                                          |       |           |           |               |          |          |           |           |           |            |

table S1. Genes with significant transposon integrations in DLD-1 KRAS<sup>G12V</sup> cells after selection in low glucose medium.

| Gene ID    | Description                                                                                                         | Chrom | Start     | End       | # TTAAs sites | Expected | Observed | Libraries | P         | FDR       | Transposon |
|------------|---------------------------------------------------------------------------------------------------------------------|-------|-----------|-----------|---------------|----------|----------|-----------|-----------|-----------|------------|
| AGPAT5     | 1-acylglycerol-3-phosphate O-acyltransferase 5 [Source:HGNC Symbol;Acc:20886]                                       | chr8  | 6568078   | 6611784   | 495           | 0.037    | 1        | 1         | 6.885E-04 | 1.654E-03 | PB-CAG-SD  |
| STK24      | serine/threonine kinase 24 [Source:HGNC Symbol;Acc:11453]                                                           | chr13 | 8912545   | 9239194   | 871           | 0.037    | 1        | 1         | 6.717E-04 | 1.656E-03 | PB-CAG-SD  |
| FBXO38     | F-box protein 38 [Source:HGNC Symbol;Acc:27020]                                                                     | chr2  | 230782018 | 23087825  | 536           | 0.038    | 1        | 1         | 6.862E-04 | 1.685E-03 | PB-CAG-SD  |
| AP133      | adaptor-related protein complex 1, sigma 3 subunit [Source:HGNC Symbol;Acc:18971]                                   | chr2  | 224618403 | 224707744 | 537           | 0.038    | 1        | 1         | 6.887E-04 | 1.686E-03 | PB-CAG-SD  |
| AN04       | ANKRD4 [Source:HGNC Symbol;Acc:23837]                                                                               | chr12 | 101193034 | 101222239 | 158           | 0.038    | 1        | 2         | 6.949E-04 | 1.692E-03 | PB-CAG-SD  |
| DLG5       | discs, large homolog 5 (Drosophila) [Source:HGNC Symbol;Acc:2904]                                                   | chr10 | 79505049  | 79691378  | 461           | 0.038    | 1        | 1         | 6.982E-04 | 1.689E-03 | PB-CAG-SD  |
| PHEX       | phosphate regulating endopeptidase homology X-like domain [Source:HGNC Symbol;Acc:8916]                             | chrX  | 22045559  | 22269427  | 1468          | 0.038    | 1        | 1         | 6.991E-04 | 1.689E-03 | PB-CAG-SD  |
| KIF5C      | kinesin family member C3 [Source:HGNC Symbol;Acc:5326]                                                              | chr16 | 17921292  | 17901867  | 395           | 0.038    | 1        | 1         | 7.015E-04 | 1.696E-03 | PB-CAG-SD  |
| EPB41L1    | erythrocyte membrane protein band 4.1-like 1 [Source:HGNC Symbol;Acc:3378]                                          | chr20 | 34674426  | 34820721  | 451           | 0.038    | 1        | 1         | 7.053E-04 | 1.689E-03 | PB-CAG-SD  |
| CRYM       | crystallin, mu [Source:HGNC Symbol;Acc:2418]                                                                        | chr19 | 21250195  | 21318404  | 396           | 0.038    | 1        | 1         | 7.055E-04 | 1.689E-03 | PB-CAG-SD  |
| SLC35F1    | solute carrier family 35, member 1 [Source:HGNC Symbol;Acc:26607]                                                   | chr10 | 95648730  | 95718819  | 454           | 0.038    | 1        | 1         | 7.072E-04 | 1.692E-03 | PB-CAG-SD  |
| FAM154A    | family with sequence similarity 154, member A [Source:HGNC Symbol;Acc:28566]                                        | chr9  | 18927566  | 19038251  | 651           | 0.038    | 1        | 1         | 7.163E-04 | 1.702E-03 | PB-CAG-SD  |
| ESRP1      | epithelial splicing regulatory protein 1 [Source:HGNC Symbol;Acc:25966]                                             | chr8  | 95848302  | 95719994  | 513           | 0.038    | 1        | 1         | 7.174E-04 | 1.702E-03 | PB-CAG-SD  |
| PTDIS1     | phosphatidylinositol synthase 1 [Source:HGNC Symbol;Acc:5987]                                                       | chr9  | 97269843  | 97346223  | 514           | 0.038    | 1        | 1         | 7.201E-04 | 1.702E-03 | PB-CAG-SD  |
| SEL1L3     | sel-1 suppressor of lin-12-like 3 (C. elegans) [Source:HGNC Symbol;Acc:29108]                                       | chr4  | 25749055  | 25870382  | 670           | 0.038    | 1        | 1         | 7.220E-04 | 1.702E-03 | PB-CAG-SD  |
| KIF5B      | kinesin family member 5B [Source:HGNC Symbol;Acc:5324]                                                              | chr10 | 32297939  | 32363059  | 474           | 0.039    | 1        | 1         | 7.376E-04 | 1.732E-03 | PB-CAG-SD  |
| PCOLCE2    | procollagen C-endopeptidase enhancer 2 [Source:HGNC Symbol;Acc:3739]                                                | chr3  | 142534764 | 142613045 | 577           | 0.039    | 1        | 1         | 7.404E-04 | 1.732E-03 | PB-CAG-SD  |
| MAP3K7CL   | MAP3K7 C-terminal like 1 [Source:HGNC Symbol;Acc:16347]                                                             | chr10 | 30444792  | 30458210  | 724           | 0.039    | 1        | 1         | 7.421E-04 | 1.732E-03 | PB-CAG-SD  |
| CN011      | cyclic nucleotide-gated channel alpha 1 [Source:HGNC Symbol;Acc:2148]                                               | chr4  | 47037994  | 48023869  | 681           | 0.039    | 1        | 1         | 7.456E-04 | 1.734E-03 | PB-CAG-SD  |
| TM1C3      | transmembrane and tetrapeptide repeat containing 3 [Source:HGNC Symbol;Acc:28999]                                   | chr12 | 88531073  | 88593664  | 686           | 0.039    | 1        | 1         | 7.530E-04 | 1.745E-03 | PB-CAG-SD  |
| LZTF1L     | leucine zipper transcription factor-like 1 [Source:HGNC Symbol;Acc:6741]                                            | chr3  | 45864808  | 45862534  | 585           | 0.040    | 1        | 1         | 7.608E-04 | 1.758E-03 | PB-CAG-SD  |
| EP11       | epsilon-factor and FYE-like domain containing E3 ubiquitin protein ligase [Source:HGNC Symbol;Acc:29361]            | chr2  | 255252915 | 25521429  | 573           | 0.040    | 1        | 1         | 7.825E-04 | 1.803E-03 | PB-CAG-SD  |
| C7         | complement component 7 [Source:HGNC Symbol;Acc:1346]                                                                | chr5  | 40504354  | 40683341  | 621           | 0.040    | 1        | 1         | 7.891E-04 | 1.811E-03 | PB-CAG-SD  |
| GAPVD1     | GTase activating protein and VPS9 domains 1 [Source:HGNC Symbol;Acc:23375]                                          | chr9  | 128019073 | 128129486 | 696           | 0.041    | 1        | 1         | 8.173E-04 | 1.862E-03 | PB-CAG-SD  |
| CNM1       | chromerina family member 1 [Source:HGNC Symbol;Acc:1940]                                                            | chrX  | 85116185  | 85307550  | 1610          | 0.041    | 1        | 1         | 8.185E-04 | 1.862E-03 | PB-CAG-SD  |
| FPRI1      | formyl peptide receptor 1 [Source:HGNC Symbol;Acc:3526]                                                             | chr19 | 52248425  | 52312363  | 326           | 0.041    | 1        | 1         | 8.192E-04 | 1.862E-03 | PB-CAG-SD  |
| NPTN       | neuropilin [Source:HGNC Symbol;Acc:18767]                                                                           | chr15 | 73862355  | 73931475  | 559           | 0.041    | 1        | 1         | 8.219E-04 | 1.862E-03 | PB-CAG-SD  |
| HSD12      | hydroxysteroid dehydrogenase like 2 [Source:HGNC Symbol;Acc:18572]                                                  | chr9  | 115137217 | 115052430 | 716           | 0.042    | 1        | 1         | 8.645E-04 | 1.950E-03 | PB-CAG-SD  |
| ABCA4      | ATP-binding cassette, sub-family A (ABC1), member 4 [Source:HGNC Symbol;Acc:34]                                     | chr1  | 94458393  | 94459169  | 609           | 0.042    | 1        | 1         | 8.663E-04 | 1.950E-03 | PB-CAG-SD  |
| ARN12      | aryl hydrocarbon receptor nuclear translocator-like 12 [Source:HGNC Symbol;Acc:18984]                               | chr12 | 27460787  | 27576241  | 739           | 0.042    | 1        | 1         | 8.721E-04 | 1.957E-03 | PB-CAG-SD  |
| CXK12      | cytosolic xanthine oxidase 2 [Source:HGNC Symbol;Acc:33393]                                                         | chr1  | 12932224  | 12932224  | 629           | 0.042    | 1        | 1         | 8.778E-04 | 1.963E-03 | PB-CAG-SD  |
| GANC3      | GA binding protein transcription factor, beta subunit 1 [Source:HGNC Symbol;Acc:4074]                               | chr15 | 50569389  | 50652605  | 603           | 0.044    | 1        | 1         | 8.943E-04 | 2.127E-03 | PB-CAG-SD  |
| UNC5C      | unc-5 homolog C (C. elegans) [Source:HGNC Symbol;Acc:12569]                                                         | chr4  | 96083655  | 96473357  | 3278          | 0.188    | 2        | 1         | 8.670E-04 | 2.149E-03 | PB-CAG-SD  |
| RFL1       | retinoid and FYE-like domain containing E3 ubiquitin protein ligase [Source:HGNC Symbol;Acc:24821]                  | chr17 | 13333009  | 13333009  | 577           | 0.045    | 1        | 1         | 7.913E-04 | 2.117E-03 | PB-CAG-SD  |
| WALS       | Wiskott-Aldrich syndrome-like 1 [Source:HGNC Symbol;Acc:12735]                                                      | chr7  | 123321989 | 12338411  | 176           | 0.045    | 1        | 1         | 8.824E-04 | 2.162E-03 | PB-CAG-SD  |
| DZANK1     | double zinc ribbon and ankyrin repeat domains 1 [Source:HGNC Symbol;Acc:15858]                                      | chr10 | 18364011  | 18453229  | 534           | 0.045    | 1        | 1         | 8.842E-04 | 2.162E-03 | PB-CAG-SD  |
| NCK1       | non-catalytic protein 1 [Source:HGNC Symbol;Acc:764]                                                                | chr3  | 13677609  | 13666665  | 697           | 0.045    | 1        | 1         | 8.845E-04 | 2.162E-03 | PB-CAG-SD  |
| MARCB6     | membrane-associated ring finger (C3HC4) 6, E3 ubiquitin protein ligase [Source:HGNC Symbol;Acc:30550]               | chr5  | 10348815  | 10440500  | 700           | 0.045    | 1        | 1         | 8.993E-04 | 2.181E-03 | PB-CAG-SD  |
| CPOX       | coproporphyrin oxidase [Source:HGNC Symbol;Acc:2321]                                                                | chr3  | 98229976  | 98317567  | 672           | 0.045    | 1        | 1         | 9.005E-04 | 2.181E-03 | PB-CAG-SD  |
| ITL1       | itilin tyrosine ligase-like family member 6 [Source:HGNC Symbol;Acc:19963]                                          | chr4  | 7694969   | 76941421  | 2189          | 0.045    | 1        | 1         | 9.016E-04 | 2.119E-03 | PB-CAG-SD  |
| ABCA7P1    | ATP-binding cassette, sub-family A (ABC1), member 7, pseudogene [Source:HGNC Symbol;Acc:32972]                      | chr18 | 2384151   | 2476700   | 480           | 0.046    | 1        | 1         | 1.031E-03 | 2.234E-03 | PB-CAG-SD  |
| EBF1       | early B factor 1 [Source:HGNC Symbol;Acc:3126]                                                                      | chr16 | 155122269 | 155931769 | 2984          | 1.193    | 2        | 1         | 1.052E-03 | 2.297E-03 | PB-CAG-SD  |
| AK7        | adenocarcinoma kinase 7 [Source:HGNC Symbol;Acc:20046]                                                              | chr14 | 98953448  | 98957674  | 535           | 0.047    | 1        | 1         | 1.054E-03 | 2.293E-03 | PB-CAG-SD  |
| USP12      | ubiquitin specific peptidase 12 [Source:HGNC Symbol;Acc:20485]                                                      | chr13 | 27640293  | 27751033  | 861           | 0.048    | 1        | 1         | 1.098E-03 | 2.358E-03 | PB-CAG-SD  |
| LNG1       | LINGO1 repeats and immunoglobulin-like domains 1 [Source:HGNC Symbol;Acc:17360]                                     | chr11 | 111761020 | 111761020 | 711           | 0.048    | 1        | 1         | 1.117E-03 | 2.423E-03 | PB-CAG-SD  |
| TKF        | TEK tyrosine kinase, endothelial [Source:HGNC Symbol;Acc:11724]                                                     | chr9  | 27104139  | 272301173 | 816           | 0.048    | 1        | 1         | 1.116E-03 | 2.379E-03 | PB-CAG-SD  |
| MAP3K7     | mitogen-activated protein kinase kinase kinase 7 [Source:HGNC Symbol;Acc:6859]                                      | chr9  | 91223292  | 91301764  | 754           | 0.048    | 1        | 1         | 1.118E-03 | 2.379E-03 | PB-CAG-SD  |
| TM1L1      | transmembrane and LIM1-like 2 (chicken) [Source:HGNC Symbol;Acc:11984]                                              | chr17 | 17746828  | 17746828  | 550           | 0.049    | 1        | 1         | 1.142E-03 | 2.423E-03 | PB-CAG-SD  |
| FAM5B      | family with sequence similarity 5, member B [Source:HGNC Symbol;Acc:13746]                                          | chr1  | 177135633 | 177251558 | 705           | 0.049    | 1        | 1         | 1.156E-03 | 2.444E-03 | PB-CAG-SD  |
| LFR-AS1    | LFR antisense RNA 1 [Source:HGNC Symbol;Acc:43600]                                                                  | chr5  | 38551888  | 38671378  | 759           | 0.049    | 1        | 1         | 1.172E-03 | 2.471E-03 | PB-CAG-SD  |
| COL9A1     | collagen type IX, alpha 1 (human) [Source:HGNC Symbol;Acc:12786]                                                    | chr6  | 8642864   | 87561155  | 659           | 0.049    | 1        | 1         | 1.175E-03 | 2.471E-03 | PB-CAG-SD  |
| PPM1A      | protein phosphatase, Mg <sup>2+</sup> /Mn <sup>2+</sup> dependent, 1A [Source:HGNC Symbol;Acc:9275]                 | chr1  | 241753404 | 241845678 | 713           | 0.049    | 1        | 1         | 1.182E-03 | 2.477E-03 | PB-CAG-SD  |
| C12orf80   | chromosome 12 open reading frame 80 [Source:HGNC Symbol;Acc:28726]                                                  | chr3  | 38201580  | 38296979  | 733           | 0.050    | 1        | 1         | 1.186E-03 | 2.478E-03 | PB-CAG-SD  |
| INTJ       | interrun cellular polarity protein [Source:HGNC Symbol;Acc:29239]                                                   | chr14 | 60707470  | 60765805  | 571           | 0.050    | 1        | 1         | 1.189E-03 | 2.478E-03 | PB-CAG-SD  |
| CMT8       | KLF-like MARVEL transmembrane domain containing 8 [Source:HGNC Symbol;Acc:19179]                                    | chr12 | 14951506  | 15059620  | 876           | 0.050    | 1        | 1         | 1.219E-03 | 2.517E-03 | PB-CAG-SD  |
| MX1        | MAX interactor 1, dimerization partner [Source:HGNC Symbol;Acc:7534]                                                | chr18 | 18440406  | 18440406  | 874           | 0.051    | 1        | 1         | 1.260E-03 | 2.586E-03 | PB-CAG-SD  |
| KNA1328    | KNA1328 [Source:HGNC Symbol;Acc:3048]                                                                               | chr3  | 32275171  | 32411817  | 748           | 0.051    | 1        | 1         | 1.235E-03 | 2.542E-03 | PB-CAG-SD  |
| ARHGAP31   | Rho GTPase activating protein 31 [Source:HGNC Symbol;Acc:29216]                                                     | chr10 | 11962863  | 112047123 | 622           | 0.051    | 1        | 1         | 1.260E-03 | 2.586E-03 | PB-CAG-SD  |
| ZNF70      | zinc finger protein 70 [Source:HGNC Symbol;Acc:26987]                                                               | chr2  | 13719550  | 131806190 | 548           | 0.051    | 1        | 1         | 1.338E-03 | 2.722E-03 | PB-CAG-SD  |
| FLI1       | flightless-like protein 1 [Source:HGNC Symbol;Acc:8617]                                                             | chr2  | 223064607 | 223186715 | 761           | 0.053    | 1        | 1         | 1.369E-03 | 2.765E-03 | PB-CAG-SD  |
| CRH1A      | crithidia, autosomal recessive 1A (crithin) [Source:HGNC Symbol;Acc:1983]                                           | chr16 | 69160194  | 69265033  | 556           | 0.053    | 1        | 1         | 1.377E-03 | 2.765E-03 | PB-CAG-SD  |
| CSMD2      | cell surface metalloprotease domain containing 2 [Source:HGNC Symbol;Acc:19200]                                     | chr15 | 64199235  | 64369322  | 527           | 0.053    | 1        | 1         | 1.379E-03 | 2.765E-03 | PB-CAG-SD  |
| DAF2       | death-associated protein kinase 2 (non-protein coding) [Source:HGNC Symbol;Acc:13478]                               | chr13 | 5001289   | 5001289   | 675           | 0.054    | 1        | 1         | 1.400E-03 | 2.790E-03 | PB-CAG-SD  |
| DLU2       | delphinidin in lymphocyte leukemia 2 (iron-protein coding) [Source:HGNC Symbol;Acc:17468]                           | chr9  | 92975118  | 93155339  | 615           | 0.054    | 1        | 1         | 1.400E-03 | 2.790E-03 | PB-CAG-SD  |
| RNS        | Rins and Rab interactor 3 [Source:HGNC Symbol;Acc:37880]                                                            | chr1  | 239953610 | 237087281 | 778           | 0.054    | 1        | 1         | 1.403E-03 | 2.790E-03 | PB-CAG-SD  |
| MTR        | 5-methyltetrahydrofolate-homocysteine methyltransferase [Source:HGNC Symbol;Acc:37488]                              | chr5  | 61810185  | 61810185  | 949           | 0.054    | 1        | 1         | 1.403E-03 | 2.790E-03 | PB-CAG-SD  |
| CCD1170    | CCD1170 domain containing 170 [Source:HGNC Symbol;Acc:31177]                                                        | chr1  | 53971910  | 54204877  | 783           | 0.054    | 1        | 1         | 1.421E-03 | 2.809E-03 | PB-CAG-SD  |
| GLI1       | glioma associated zinc finger 1 [Source:HGNC Symbol;Acc:29525]                                                      | chr1  | 64929981  | 65203277  | 2635          | 0.216    | 2        | 1         | 1.435E-03 | 2.830E-03 | PB-CAG-SD  |
| JMJD1C     | jumonji domain containing 1C [Source:HGNC Symbol;Acc:12313]                                                         | chr11 | 10345605  | 10345605  | 942           | 0.055    | 1        | 1         | 1.458E-03 | 2.858E-03 | PB-CAG-SD  |
| RDX        | ribonucleoside diphosphate reductase complex chaperone [Source:HGNC Symbol;Acc:15891]                               | chr20 | 33809369  | 34004944  | 652           | 0.055    | 1        | 1         | 1.458E-03 | 2.858E-03 | PB-CAG-SD  |
| UQC        | ubiquitin cytosolic reductase complex [Source:HGNC Symbol;Acc:11719]                                                | chr4  | 48137800  | 48137800  | 966           | 0.055    | 1        | 1         | 1.458E-03 | 2.858E-03 | PB-CAG-SD  |
| UBI2H      | ubiquitin-conjugating enzyme E2H [Source:HGNC Symbol;Acc:12484]                                                     | chr7  | 129475712 | 129297789 | 894           | 0.055    | 1        | 1         | 1.484E-03 | 2.902E-03 | PB-CAG-SD  |
| PREP       | prolyl endopeptidase [Source:HGNC Symbol;Acc:9358]                                                                  | chr10 | 33809369  | 34004944  | 652           | 0.055    | 1        | 1         | 1.458E-03 | 2.858E-03 | PB-CAG-SD  |
| MPF2       | matrix metalloproteinase 2 (gelatinase A, 72kDa gelatinase, 72kDa type IV collagenase) [Source:HGNC Symbol;Acc:166] | chr16 | 55418812  | 55589503  | 592           | 0.057    | 1        | 1         | 1.557E-03 | 3.003E-03 | PB-CAG-SD  |
| ZNF108     | ZNF108 MYND-type containing 8 [Source:HGNC Symbol;Acc:3937]                                                         | chr1  | 65937859  | 65990567  | 675           | 0.057    | 1        | 1         | 1.560E-03 | 3.003E-03 | PB-CAG-SD  |
| CDKN2B-AS1 | CDKN2B antisense RNA 1 [Source:HGNC Symbol;Acc:34341]                                                               | chr9  | 21897777  | 22121096  | 688           | 0.057    | 1        | 1         | 1.564E-03 | 3.003E-03 | PB-CAG-SD  |
| TRIP11     | thyroid hormone receptor interactor 11 [Source:HGNC Symbol;Acc:12305]                                               | chr14 | 92423335  | 92512240  | 651           | 0.057    | 1        | 1         | 1.565E-03 | 3.0       |            |

Table S1. Genes with significant transposon integrations in DLD-1 KRAS<sup>G12S</sup> cells after selection in low glucose medium.

| Gene ID   | Description                                                                                                           | Chrom | Start     | End       | # TTAAs sites | Expected | Observed | Libraries | P         | FDR | Transposon |
|-----------|-----------------------------------------------------------------------------------------------------------------------|-------|-----------|-----------|---------------|----------|----------|-----------|-----------|-----|------------|
| ELAVL4    | ELAV (embryonic lethal, abnormal vision, Drosophila)-like 4 [Source:HGNC Symbol;Acc:3315]                             | chr1  | 50596886  | 50969488  | 1157          | 0.080    | 1        | 3.049E-03 | 4.829E-03 |     | PB-CAG-SG  |
| WDHR48    | WDHR domain 54 [Source:HGNC Symbol;Acc:28670]                                                                         | chr1  | 241810580 | 125929435 | 1169          | 0.081    | 1        | 3.115E-03 | 4.916E-03 |     | PB-CAG-SG  |
| FREM1     | FREM1 related extracellular matrix 1 [Source:HGNC Symbol;Acc:23399]                                                   | chr9  | 14734664  | 14919933  | 1383          | 0.081    | 1        | 3.142E-03 | 4.953E-03 |     | PB-CAG-SG  |
| KIAA1468  | KIAA1468 [Source:HGNC Symbol;Acc:29289]                                                                               | chr18 | 59849491  | 59974335  | 1248          | 0.082    | 1        | 3.163E-03 | 4.976E-03 |     | PB-CAG-SG  |
| SRGAP2B   | SRGAP2B Rho GTPase activating protein 2B [Source:HGNC Symbol;Acc:35373]                                               | chr1  | 143939615 | 14499424  | 1181          | 0.082    | 1        | 3.173E-03 | 5.001E-03 |     | PB-CAG-SG  |
| TULP4     | tubby like protein 4 [Source:HGNC Symbol;Acc:15530]                                                                   | chr6  | 15872892  | 15893260  | 1289          | 0.082    | 1        | 3.195E-03 | 5.004E-03 |     | PB-CAG-SG  |
| LINC0070  | long intergenic non-protein coding RNA 970 [Source:HGNC Symbol;Acc:48730]                                             | chr1  | 168873143 | 169091243 | 1189          | 0.082    | 1        | 3.215E-03 | 5.024E-03 |     | PB-CAG-SG  |
| DNAJC15   | DNAJC15 homolog, subfamily C, member 15 [Source:HGNC Symbol;Acc:30343]                                                | chr1  | 192113120 | 19227826  | 1231          | 0.083    | 1        | 3.273E-03 | 5.091E-03 |     | PB-CAG-SG  |
| PAN3      | PAN3 poly(A) specific ribonuclease subunit homolog (S. cerevisiae) [Source:HGNC Symbol;Acc:29991]                     | chr13 | 28707643  | 28869475  | 1504          | 0.083    | 1        | 3.273E-03 | 5.091E-03 |     | PB-CAG-SG  |
| DDX96L    | DEAD (Asp-Glu-Ala-Asp) box polypeptide 60-like [Source:HGNC Symbol;Acc:26429]                                         | chr4  | 169277886 | 169462937 | 1463          | 0.084    | 1        | 3.340E-03 | 5.184E-03 |     | PB-CAG-SG  |
| LNK1      | lin-11, umb-1 protein X.1, E3 ubiquitin-protein ligase [Source:HGNC Symbol;Acc:65877]                                 | chr4  | 54354668  | 54572572  | 1470          | 0.084    | 1        | 3.371E-03 | 5.199E-03 |     | PB-CAG-SG  |
| CPVL      | carboxypeptidase, vitellogenic-like [Source:HGNC Symbol;Acc:14399]                                                    | chr7  | 29034847  | 29240067  | 1374          | 0.086    | 1        | 3.520E-03 | 5.439E-03 |     | PB-CAG-SG  |
| LEPREL1   | leprexin-like 1 [Source:HGNC Symbol;Acc:19371]                                                                        | chr3  | 189614517 | 189846226 | 1297          | 0.088    | 1        | 3.622E-03 | 5.576E-03 |     | PB-CAG-SG  |
| HOMER1    | homolog 1 (Drosophila) [Source:HGNC Symbol;Acc:17512]                                                                 | chr5  | 178694509 | 178815040 | 1362          | 0.088    | 1        | 3.625E-03 | 5.576E-03 |     | PB-CAG-SG  |
| MORC1     | MORC family CW-type zinc finger 1 [Source:HGNC Symbol;Acc:1798]                                                       | chr3  | 108677086 | 108841989 | 1310          | 0.089    | 1        | 3.693E-03 | 5.664E-03 |     | PB-CAG-SG  |
| FANCC     | Fanconi anemia, complementation group C [Source:HGNC Symbol;Acc:3684]                                                 | chr9  | 97861336  | 98084991  | 1504          | 0.089    | 1        | 3.696E-03 | 5.664E-03 |     | PB-CAG-SG  |
| SYT1      | synaptotagmin I [Source:HGNC Symbol;Acc:11509]                                                                        | chr12 | 70252773  | 70849786  | 5097          | 0.304    | 2        | 3.721E-03 | 5.676E-03 |     | PB-CAG-SG  |
| SYT9      | synaptotagmin IX [Source:HGNC Symbol;Acc:19268]                                                                       | chr11 | 7255009   | 7490273   | 1531          | 0.089    | 1        | 3.721E-03 | 5.676E-03 |     | PB-CAG-SG  |
| ZFAT      | zinc finger and AT hook domain containing [Source:HGNC Symbol;Acc:19899]                                              | chr8  | 154460031 | 153730292 | 1210          | 0.090    | 1        | 3.855E-03 | 5.807E-03 |     | PB-CAG-SG  |
| ITSN1     | intersectin 1 (SH3 domain protein) [Source:HGNC Symbol;Acc:6183]                                                      | chr21 | 35009706  | 35272165  | 1701          | 0.092    | 1        | 3.956E-03 | 6.007E-03 |     | PB-CAG-SG  |
| SMC3      | structural maintenance of chromosomes 3 [Source:HGNC Symbol;Acc:20486]                                                | chr2  | 17845079  | 17866509  | 1314          | 0.092    | 1        | 3.978E-03 | 6.027E-03 |     | PB-CAG-SG  |
| STARD13   | START-related lipid transfer (START) domain containing 13 [Source:HGNC Symbol;Acc:19164]                              | chr3  | 13977272  | 14109324  | 1599          | 0.093    | 1        | 4.062E-03 | 6.142E-03 |     | PB-CAG-SG  |
| ADM32     | ADAM metalloproteinase domain 32 [Source:HGNC Symbol;Acc:15479]                                                       | chr8  | 38959509  | 39142430  | 1254          | 0.094    | 1        | 4.125E-03 | 6.234E-03 |     | PB-CAG-SG  |
| FAM65B    | famly with sequence similarity 65, member B [Source:HGNC Symbol;Acc:13872]                                            | chr6  | 24797601  | 25047238  | 1494          | 0.095    | 1        | 4.256E-03 | 6.406E-03 |     | PB-CAG-SG  |
| HUS1      | checkpoint homolog (S. pombe) [Source:HGNC Symbol;Acc:17619]                                                          | chr7  | 47753528  | 48024178  | 1520          | 0.096    | 1        | 4.282E-03 | 6.444E-03 |     | PB-CAG-SG  |
| ARHGAP12  | Rho GTPase activating protein 12 [Source:HGNC Symbol;Acc:16348]                                                       | chr10 | 32094365  | 32222474  | 1164          | 0.096    | 1        | 4.284E-03 | 6.444E-03 |     | PB-CAG-SG  |
| DCK2      | dedicator of cytokinesis 8 [Source:HGNC Symbol;Acc:19119]                                                             | chr9  | 209854    | 465259    | 1625          | 0.096    | 1        | 4.297E-03 | 6.444E-03 |     | PB-CAG-SG  |
| NRGF1-AS1 | NRGF1 antisense RNA 1 [Source:HGNC Symbol;Acc:48622]                                                                  | chr5  | 62745065  | 62863854  | 1476          | 0.096    | 1        | 4.297E-03 | 6.444E-03 |     | PB-CAG-SG  |
| NRG1      | neuregulin 1 [Source:HGNC Symbol;Acc:7997]                                                                            | chr8  | 31491902  | 32822548  | 8648          | 0.647    | 3        | 4.371E-03 | 6.509E-03 |     | PB-CAG-SG  |
| SORCS3    | sortilin-related VPS10 domain containing receptor 3 [Source:HGNC Symbol;Acc:16699]                                    | chr10 | 106398589 | 107024993 | 3931          | 0.323    | 2        | 4.404E-03 | 6.546E-03 |     | PB-CAG-SG  |
| MYO1B     | myosin I class IIB [Source:HGNC Symbol;Acc:7696]                                                                      | chr2  | 92104911  | 92846939  | 1349          | 0.100    | 1        | 4.426E-03 | 6.569E-03 |     | PB-CAG-SG  |
| BPTF      | bromodomain PHD finger transcription factor [Source:HGNC Symbol;Acc:3581]                                             | chr17 | 65816640  | 65980494  | 1103          | 0.097    | 1        | 4.448E-03 | 6.583E-03 |     | PB-CAG-SG  |
| FANP1     | FERN, RHOGEF (ARHGAP2) and pleckstrin domain protein 1 (chondrocyte-derived) [Source:HGNC Symbol;Acc:35911]           | chr13 | 98789186  | 99102027  | 1769          | 0.098    | 1        | 4.484E-03 | 6.622E-03 |     | PB-CAG-SG  |
| CHD12     | chromatin domain 12 [Source:HGNC Symbol;Acc:1761]                                                                     | chr12 | 31755782  | 31895741  | 1279          | 0.102    | 1        | 4.625E-03 | 6.924E-03 |     | PB-CAG-SG  |
| RBFMS     | RNA binding protein with multiple splice [Source:HGNC Symbol;Acc:19097]                                               | chr8  | 30226944  | 30429778  | 1311          | 0.098    | 1        | 4.630E-03 | 6.623E-03 |     | PB-CAG-SG  |
| FAM98B    | famly with sequence similarity 49, member B [Source:HGNC Symbol;Acc:25216]                                            | chr8  | 10081839  | 10130475  | 1330          | 0.099    | 1        | 4.631E-03 | 6.795E-03 |     | PB-CAG-SG  |
| EXOC2     | exon complex component 2 [Source:HGNC Symbol;Acc:24988]                                                               | chr12 | 498133    | 6981117   | 1616          | 0.110    | 1        | 4.678E-03 | 7.004E-03 |     | PB-CAG-SG  |
| MYO6      | myosin VI [Source:HGNC Symbol;Acc:7605]                                                                               | chr6  | 76453909  | 76629254  | 1575          | 0.100    | 1        | 4.713E-03 | 6.888E-03 |     | PB-CAG-SG  |
| ADM10     | ADAM metalloproteinase domain 10 [Source:HGNC Symbol;Acc:168]                                                         | chr15 | 58887403  | 59041777  | 1382          | 0.102    | 1        | 4.826E-03 | 7.038E-03 |     | PB-CAG-SG  |
| AFB1      | AFB1 related protein complex 2, beta 1 subunit [Source:HGNC Symbol;Acc:563]                                           | chr17 | 3300206   | 33261426  | 1154          | 0.102    | 1        | 4.854E-03 | 7.064E-03 |     | PB-CAG-SG  |
| MAN1A1    | mannosidase, class 1A, member 1 [Source:HGNC Symbol;Acc:6821]                                                         | chr6  | 119488374 | 119879266 | 1602          | 0.102    | 1        | 4.871E-03 | 7.074E-03 |     | PB-CAG-SG  |
| RPH3A     | raspin 3A homolog (mouse) [Source:HGNC Symbol;Acc:7056]                                                               | chr1  | 110331694 | 110336868 | 1707          | 0.102    | 1        | 4.900E-03 | 7.102E-03 |     | PB-CAG-SG  |
| SPRHD     | sporadic hyaline spherule disease 3 [Source:HGNC Symbol;Acc:19125]                                                    | chr12 | 65667423  | 65882024  | 1798          | 0.103    | 1        | 4.905E-03 | 7.102E-03 |     | PB-CAG-SG  |
| LIPA      | lipase A, lysosomal acid, cholesterol esterase [Source:HGNC Symbol;Acc:6617]                                          | chr10 | 90973326  | 91179314  | 1280          | 0.103    | 1        | 4.994E-03 | 7.200E-03 |     | PB-CAG-SG  |
| GAS7      | growth arrest-specific 7 [Source:HGNC Symbol;Acc:19119]                                                               | chr17 | 6091368   | 61078888  | 1173          | 0.104    | 1        | 5.002E-03 | 7.200E-03 |     | PB-CAG-SG  |
| LCOR      | ligand dependent nuclear receptor corepressor [Source:HGNC Symbol;Acc:29503]                                          | chr10 | 9858071   | 98740800  | 1262          | 0.104    | 1        | 5.009E-03 | 7.200E-03 |     | PB-CAG-SG  |
| OSBPL6    | oxysterol binding protein-like 6 [Source:HGNC Symbol;Acc:16388]                                                       | chr2  | 179054208 | 179264160 | 1515          | 0.106    | 1        | 5.239E-03 | 7.515E-03 |     | PB-CAG-SG  |
| PFMH3     | perlecan, heparan sulfate, heparin, and laminin-5 [Source:HGNC Symbol;Acc:18583]                                      | chr2  | 63027862  | 63819168  | 1961          | 0.107    | 1        | 5.300E-03 | 7.586E-03 |     | PB-CAG-SG  |
| SEMA3C    | sema domain, immunoglobulin domain (Ig), short basic domain, secreted, (semaphorin) 3C [Source:HGNC Symbol;Acc:10725] | chr7  | 8037185   | 80356675  | 1709          | 0.107    | 1        | 5.370E-03 | 7.672E-03 |     | PB-CAG-SG  |
| SPON1     | spondin 1, extracellular matrix protein [Source:HGNC Symbol;Acc:11252]                                                | chr11 | 13978914  | 14289646  | 1860          | 0.108    | 1        | 5.423E-03 | 7.732E-03 |     | PB-CAG-SG  |
| LHRF12    | lipoma HMGIC fusion partner like 2 [Source:HGNC Symbol;Acc:19149]                                                     | chr2  | 67781038  | 67907684  | 1674          | 0.107    | 1        | 5.481E-03 | 7.783E-03 |     | PB-CAG-SG  |
| LPP       | LIM domain containing preferred translocation partner in lipoma [Source:HGNC Symbol;Acc:6670]                         | chr1  | 18786607  | 18800460  | 5171          | 0.349    | 2        | 5.481E-03 | 7.783E-03 |     | PB-CAG-SG  |
| NR2F2-AS1 | NR2F2 antisense RNA 2 [Source:HGNC Symbol;Acc:44222]                                                                  | chr15 | 96670598  | 96879590  | 1510          | 0.111    | 1        | 5.726E-03 | 8.113E-03 |     | PB-CAG-SG  |
| TMEM26B   | transmembrane protein 26B [Source:HGNC Symbol;Acc:20184]                                                              | chr2  | 66950072  | 67208124  | 1273          | 0.112    | 1        | 5.744E-03 | 8.150E-03 |     | PB-CAG-SG  |
| GRK4      | guanine receptor, ionotropic, kinase 4 [Source:HGNC Symbol;Acc:4582]                                                  | chr11 | 102377468 | 102859613 | 1947          | 0.113    | 1        | 5.923E-03 | 8.359E-03 |     | PB-CAG-SG  |
| PDRN3     | PDZ domain containing ring finger 3 [Source:HGNC Symbol;Acc:17704]                                                    | chr3  | 73431584  | 73679091  | 1695          | 0.115    | 1        | 6.077E-03 | 8.560E-03 |     | PB-CAG-SG  |
| LINC00511 | long intergenic non-protein coding RNA 511 [Source:HGNC Symbol;Acc:43564]                                             | chr1  | 10319264  | 10321968  | 1119          | 0.100    | 1        | 6.171E-03 | 8.643E-03 |     | PB-CAG-SG  |
| GPC5      | glypican 5 [Source:HGNC Symbol;Acc:4453]                                                                              | chr13 | 92045299  | 93519490  | 12929         | 0.715    | 3        | 6.190E-03 | 8.683E-03 |     | PB-CAG-SG  |
| CACNB4    | calcium channel, voltage-dependent, beta 4 subunit [Source:HGNC Symbol;Acc:1404]                                      | chr2  | 15269290  | 152960593 | 1659          | 0.116    | 1        | 6.240E-03 | 8.737E-03 |     | PB-CAG-SG  |
| RARGFE1   | Rap guanine nucleotide exchange factor (GEF) 2 [Source:HGNC Symbol;Acc:18662]                                         | chr13 | 96453834  | 96710736  | 2122          | 0.117    | 1        | 6.240E-03 | 8.737E-03 |     | PB-CAG-SG  |
| UGT2      | UDP-glucose glycosyltransferase 2 [Source:HGNC Symbol;Acc:15664]                                                      | chr13 | 96453834  | 96710736  | 2122          | 0.117    | 1        | 6.370E-03 | 8.882E-03 |     | PB-CAG-SG  |
| ADM1917   | ADAM metalloproteinase with thrombospondin type 1 motif, 17 [Source:HGNC Symbol;Acc:17109]                            | chr15 | 100511794 | 100887210 | 1601          | 0.118    | 1        | 6.408E-03 | 8.916E-03 |     | PB-CAG-SG  |
| PFKFB2    | phosphofructokinase 2 [Source:HGNC Symbol;Acc:8901]                                                                   | chr2  | 67681606  | 67947469  | 1599          | 0.120    | 1        | 6.425E-03 | 9.040E-03 |     | PB-CAG-SG  |
| NDFUFA2   | NADH dehydrogenase (ubiquinone) complex I, assembly factor 2 [Source:HGNC Symbol;Acc:28088]                           | chr5  | 60235666  | 60448583  | 1820          | 0.118    | 1        | 6.438E-03 | 9.024E-03 |     | PB-CAG-SG  |
| EPH4L2    | erythropoietin membrane protein band 4, like 2 [Source:HGNC Symbol;Acc:3379]                                          | chr6  | 13160487  | 13138462  | 1862          | 0.119    | 1        | 6.509E-03 | 8.986E-03 |     | PB-CAG-SG  |
| TFEB      | transcription factor EB [Source:HGNC Symbol;Acc:19149]                                                                | chr1  | 63181207  | 63381164  | 1614          | 0.121    | 1        | 6.509E-03 | 8.986E-03 |     | PB-CAG-SG  |
| RNF180    | ring finger protein 180 [Source:HGNC Symbol;Acc:27752]                                                                | chr5  | 63456671  | 63668896  | 1842          | 0.119    | 1        | 6.588E-03 | 9.078E-03 |     | PB-CAG-SG  |
| MFSD1     | microfibril-associated protein 1 [Source:HGNC Symbol;Acc:6894]                                                        | chr2  | 6305113   | 6301144   | 1599          | 0.120    | 1        | 6.605E-03 | 9.083E-03 |     | PB-CAG-SG  |
| SFBM2     | Schlike-like four ribz domain protein 2 [Source:HGNC Symbol;Acc:20256]                                                | chr10 | 7200986   | 748460    | 1460          | 0.120    | 1        | 6.632E-03 | 9.103E-03 |     | PB-CAG-SG  |
| ANTXR2    | anthrax toxin receptor 2 [Source:HGNC Symbol;Acc:21732]                                                               | chr4  | 80822303  | 81051608  | 2091          | 0.120    | 1        | 6.652E-03 | 9.126E-03 |     | PB-CAG-SG  |
| PBC3      | peptide leukemia homeobox 3 [Source:HGNC Symbol;Acc:8634]                                                             | chr9  | 12856204  | 12899563  | 2049          | 0.121    | 1        | 6.682E-03 | 9.159E-03 |     | PB-CAG-SG  |
| MEF2C     | myocyte enhancer factor 2C [Source:HGNC Symbol;Acc:6996]                                                              | chr5  | 88013975  | 88240292  | 1881          | 0.122    | 1        | 6.859E-03 | 9.359E-03 |     | PB-CAG-SG  |
| CAST      | calpastin [Source:HGNC Symbol;Acc:1516]                                                                               | chr5  | 98585971  | 98119299  | 1887          | 0.122    | 1        | 6.901E-03 | 9.398E-03 |     | PB-CAG-SG  |
| APF       | amyloid beta A4 precursor protein [Source:HGNC Symbol;Acc:620]                                                        | chr1  | 17252681  | 17458446  | 2276          | 0.123    | 1        | 6.901E-03 | 9.398E-03 |     | PB-CAG-SG  |
| SLC30A8   | solute carrier family 30 (zinc transporter), member 8 [Source:HGNC Symbol;Acc:20303]                                  | chr2  | 11797512  | 118188962 | 1645          | 0.123    | 1        | 6.974E-03 | 9.461E-03 |     | PB-CAG-SG  |
| TMT1C     | transmembrane and tetrahydropteroyl repeat containing 1 [Source:HGNC Symbol;Acc:24099]                                | chr12 | 29653773  | 29942992  | 2157          | 0.124    | 1        | 7.040E-03 | 9.532E-03 |     | PB-CAG-SG  |
| ZNF423    | zinc finger protein 423 [Source:HGNC Symbol;Acc:19149]                                                                | chr16 | 69521435  | 69589830  | 1209          | 0.123    | 1        | 7.167E-03 | 9.617E-03 |     | PB-CAG-SG  |
| ZSWIM5    | zinc finger, SWIM-type containing 5 [Source:HGNC Symbol;Acc:29299]                                                    | chr1  | 45482071  | 45776881  | 1801          | 0.125    |          |           |           |     |            |

**Table S1. Genes with significant transposon integrations in DLD-1 KRAS<sup>G12S</sup> cells after selection in low glucose medium.**

| Gene ID    | Description                                                                                                                               | Chrom | Start     | End       | # TTAAs sites | Expected | Observed | Libraries | P         | FDR       | Transposon |
|------------|-------------------------------------------------------------------------------------------------------------------------------------------|-------|-----------|-----------|---------------|----------|----------|-----------|-----------|-----------|------------|
| STAG1      | stromal antigen 1 [Source:HGNC Symbol;Acc:11354]                                                                                          | chr3  | 136055077 | 136476220 | 3111          | 0.210    | 1        | 1         | 1.922E-02 | 2.239E-02 | PB-CAG-SD  |
| MYT1L      | myelin transcription factor 1-like [Source:HGNC Symbol;Acc:7523]                                                                          | chr2  | 1792888   | 2240332   | 3020          | 0.211    | 1        | 1         | 1.942E-02 | 2.259E-02 | PB-CAG-SD  |
| ZNF385D    | zinc finger protein 385D [Source:HGNC Symbol;Acc:26191]                                                                                   | chr3  | 21459915  | 22419812  | 8331          | 0.563    | 2        | 1         | 1.960E-02 | 2.276E-02 | PB-CAG-SD  |
| INADL      | InaD-like (Drosophila) [Source:HGNC Symbol;Acc:28881]                                                                                     | chr1  | 62203149  | 62629592  | 3073          | 0.213    | 1        | 1         | 1.971E-02 | 2.284E-02 | PB-CAG-SD  |
| DYNC2H1    | dyncen, cytoplasmic 2, heavy chain 1 [Source:HGNC Symbol;Acc:2962]                                                                        | chr11 | 102975160 | 103359591 | 3691          | 0.214    | 1        | 1         | 1.991E-02 | 2.304E-02 | PB-CAG-SD  |
| DYM        | dymedlin [Source:HGNC Symbol;Acc:21317]                                                                                                   | chr18 | 46570039  | 46992717  | 3301          | 0.216    | 1        | 1         | 2.026E-02 | 2.338E-02 | PB-CAG-SD  |
| ESR1       | estrogen receptor 1 [Source:HGNC Symbol;Acc:3467]                                                                                         | chr6  | 151972626 | 152450754 | 3393          | 0.216    | 1        | 1         | 2.027E-02 | 2.338E-02 | PB-CAG-SD  |
| GLIS3      | GLIS family zinc finger 3 [Source:HGNC Symbol;Acc:29510]                                                                                  | chr9  | 3624127   | 4333392   | 3677          | 0.217    | 1        | 1         | 2.032E-02 | 2.339E-02 | PB-CAG-SD  |
| KKR4       | Kx, Kell blood group complex subunit-related family, member 4 [Source:HGNC Symbol;Acc:29394]                                              | chr8  | 56009949  | 56438714  | 2920          | 0.218    | 1        | 1         | 2.064E-02 | 2.372E-02 | PB-CAG-SD  |
| AGAP1      | ArtGAP with GTPase domain, ankyrin repeat and PH domain 1 [Source:HGNC Symbol;Acc:16922]                                                  | chr2  | 236397733 | 237035196 | 3124          | 0.219    | 1        | 1         | 2.069E-02 | 2.372E-02 | PB-CAG-SD  |
| SYNS       | synapsin III [Source:HGNC Symbol;Acc:11486]                                                                                               | chr22 | 32008639  | 33456956  | 2391          | 0.219    | 1        | 1         | 2.070E-02 | 2.372E-02 | PB-CAG-SD  |
| FBN2       | fibillin 2 [Source:HGNC Symbol;Acc:3604]                                                                                                  | chr5  | 127593601 | 127998878 | 3412          | 0.221    | 1        | 1         | 2.114E-02 | 2.418E-02 | PB-CAG-SD  |
| BN2C       | basonucin 2 [Source:HGNC Symbol;Acc:30568]                                                                                                | chr9  | 16409501  | 16875941  | 3763          | 0.223    | 1        | 1         | 2.142E-02 | 2.446E-02 | PB-CAG-SD  |
| MYO3B      | myosin IIB [Source:HGNC Symbol;Acc:15576]                                                                                                 | chr2  | 171026655 | 171511981 | 3207          | 0.224    | 1        | 1         | 2.172E-02 | 2.476E-02 | PB-CAG-SD  |
| PTPRN2     | protein tyrosine phosphatase, receptor type, N polypeptide 2 [Source:HGNC Symbol;Acc:9677]                                                | chr7  | 157331750 | 158385480 | 3581          | 0.225    | 1        | 1         | 2.182E-02 | 2.484E-02 | PB-CAG-SD  |
| TUSC3      | tumor suppressor candidate 3 [Source:HGNC Symbol;Acc:30242]                                                                               | chr8  | 15269724  | 1524188   | 3028          | 0.226    | 1        | 1         | 2.208E-02 | 2.506E-02 | PB-CAG-SD  |
| PCDH7      | protocadherin 7 [Source:HGNC Symbol;Acc:8669]                                                                                             | chr4  | 30717037  | 31148422  | 3978          | 0.229    | 1        | 1         | 2.245E-02 | 2.547E-02 | PB-CAG-SD  |
| GALNTL6    | UDP-N-acetyl-alpha-D-galactosamine polypeptide N-acetylglucosaminyltransferase-like 6 [Source:HGNC Symbol;Acc:33844]                      | chr4  | 172728405 | 173962710 | 10348         | 0.594    | 2        | 1         | 2.257E-02 | 2.557E-02 | PB-CAG-SD  |
| TRAPP9     | trafficking protein particle complex 9 [Source:HGNC Symbol;Acc:30832]                                                                     | chr8  | 140742586 | 141473878 | 3094          | 0.231    | 1        | 1         | 2.289E-02 | 2.598E-02 | PB-CAG-SD  |
| SLCA10     | solute carrier family 4, sodium bicarbonate transporter, member 10 [Source:HGNC Symbol;Acc:13811]                                         | chr2  | 162475845 | 162841792 | 3345          | 0.234    | 1        | 1         | 2.348E-02 | 2.651E-02 | PB-CAG-SD  |
| CACNB2     | calcium channel, voltage-dependent, beta 2 subunit [Source:HGNC Symbol;Acc:1402]                                                          | chr10 | 18424806  | 18830798  | 2857          | 0.235    | 1        | 1         | 2.355E-02 | 2.655E-02 | PB-CAG-SD  |
| SLCSA1-AS1 | SLCSA1 antisense RNA 1 [Source:HGNC Symbol;Acc:44102]                                                                                     | chr2  | 40008593  | 40482349  | 3402          | 0.238    | 1        | 1         | 2.422E-02 | 2.726E-02 | PB-CAG-SD  |
| CCDC171    | coiled-coil domain containing 171 [Source:HGNC Symbol;Acc:29828]                                                                          | chr9  | 15547895  | 16061661  | 4070          | 0.240    | 1        | 1         | 2.452E-02 | 2.755E-02 | PB-CAG-SD  |
| PHACTR1    | phosphatase and actin regulator 1 [Source:HGNC Symbol;Acc:20990]                                                                          | chr6  | 12712893  | 13286645  | 3857          | 0.246    | 1        | 1         | 2.569E-02 | 2.882E-02 | PB-CAG-SD  |
| PDE11A     | phosphodiesterase 11A [Source:HGNC Symbol;Acc:8773]                                                                                       | chr2  | 178423707 | 178978066 | 3549          | 0.248    | 1        | 1         | 2.618E-02 | 2.930E-02 | PB-CAG-SD  |
| NEBL       | nebulin [Source:HGNC Symbol;Acc:16932]                                                                                                    | chr10 | 21068902  | 21468116  | 3027          | 0.248    | 1        | 1         | 2.620E-02 | 2.930E-02 | PB-CAG-SD  |
| ZNF385B    | zinc finger protein 385B [Source:HGNC Symbol;Acc:26332]                                                                                   | chr2  | 180306709 | 180731232 | 3597          | 0.252    | 1        | 1         | 2.684E-02 | 2.996E-02 | PB-CAG-SD  |
| ITFC1      | integrin alpha FG-GAP repeat containing 1 [Source:HGNC Symbol;Acc:30567]                                                                  | chr16 | 47189206  | 47603060  | 2638          | 0.252    | 1        | 1         | 2.698E-02 | 3.007E-02 | PB-CAG-SD  |
| SLC27A6    | solute carrier family 27 (fatty acid transporter), member 6 [Source:HGNC Symbol;Acc:11000]                                                | chr5  | 127688706 | 128369335 | 3928          | 0.255    | 1        | 1         | 2.742E-02 | 3.051E-02 | PB-CAG-SD  |
| HYDIN      | HYDIN, axonemal central pair apparatus protein [Source:HGNC Symbol;Acc:19368]                                                             | chr16 | 70841281  | 71269626  | 2691          | 0.259    | 1        | 1         | 2.818E-02 | 3.131E-02 | PB-CAG-SD  |
| SYNE1      | spectrin repeat containing, nuclear envelope 1 [Source:HGNC Symbol;Acc:17080]                                                             | chr6  | 152442619 | 152963936 | 4072          | 0.260    | 1        | 1         | 2.838E-02 | 3.148E-02 | PB-CAG-SD  |
| HCN1       | hyperpolarization activated cyclic nucleotide-gated potassium channel 1 [Source:HGNC Symbol;Acc:4846]                                     | chr5  | 45269349  | 45701253  | 4107          | 0.266    | 1        | 1         | 2.974E-02 | 3.295E-02 | PB-CAG-SD  |
| PTH2R      | parathyroid hormone 2 receptor [Source:HGNC Symbol;Acc:9609]                                                                              | chr2  | 209219438 | 209719227 | 3940          | 0.276    | 1        | 1         | 3.170E-02 | 3.506E-02 | PB-CAG-SD  |
| EDL3       | EGF-like repeats and disconnexin like domains 3 [Source:HGNC Symbol;Acc:3173]                                                             | chr5  | 83283373  | 83866111  | 4296          | 0.279    | 1        | 1         | 3.231E-02 | 3.566E-02 | PB-CAG-SD  |
| ALK        | anaplastic lymphoma receptor tyrosine kinase [Source:HGNC Symbol;Acc:427]                                                                 | chr2  | 29415640  | 30149432  | 4001          | 0.280    | 1        | 1         | 3.260E-02 | 3.594E-02 | PB-CAG-SD  |
| SIPA1L1    | signal-induced proliferation-associated 1 like 1 [Source:HGNC Symbol;Acc:20284]                                                           | chr14 | 71782166  | 72207946  | 3204          | 0.281    | 1        | 1         | 3.274E-02 | 3.603E-02 | PB-CAG-SD  |
| STGALNAC3  | ST6 (alpha-N-acetyl-neuraminyl-2,6-beta-galactosyl-1,3-N-acetylglucosaminide alpha-2,6-sialyltransferase 3 [Source:HGNC Symbol;Acc:19343] | chr1  | 7653404   | 77100286  | 4114          | 0.285    | 1        | 1         | 3.370E-02 | 3.702E-02 | PB-CAG-SD  |
| KCNH5      | potassium voltage-gated channel, subfamily H (eag-related), member 5 [Source:HGNC Symbol;Acc:6254]                                        | chr14 | 63173287  | 63573755  | 3258          | 0.285    | 1        | 1         | 3.374E-02 | 3.702E-02 | PB-CAG-SD  |
| RG57       | regulator of G-protein signaling 7 [Source:HGNC Symbol;Acc:10003]                                                                         | chr1  | 240931554 | 241525330 | 4242          | 0.294    | 1        | 1         | 3.562E-02 | 3.902E-02 | PB-CAG-SD  |
| SLC26A9    | solute carrier family 9, subfamily A (NH3), cation proton antiporter 9, member 9 [Source:HGNC Symbol;Acc:20653]                           | chr3  | 142984654 | 143872373 | 4374          | 0.296    | 1        | 1         | 3.594E-02 | 3.931E-02 | PB-CAG-SD  |
| MAST4      | microtubule associated serine/threonine kinase family member 4 [Source:HGNC Symbol;Acc:19037]                                             | chr5  | 65887176  | 66465423  | 4572          | 0.296    | 1        | 1         | 3.615E-02 | 3.947E-02 | PB-CAG-SD  |
| NRG3       | neuregulin 3 [Source:HGNC Symbol;Acc:7969]                                                                                                | chr10 | 83630070  | 84746935  | 8523          | 0.724    | 2        | 1         | 3.716E-02 | 4.051E-02 | PB-CAG-SD  |
| CD98       | cadherin 8, type 2 [Source:HGNC Symbol;Acc:1767]                                                                                          | chr16 | 61681146  | 62075939  | 3150          | 0.293    | 1        | 1         | 3.752E-02 | 4.084E-02 | PB-CAG-SD  |
| TANC2      | tetrahydropeptide repeat, ankyrin repeat and coiled-coil containing 2 [Source:HGNC Symbol;Acc:30212]                                      | chr17 | 61081917  | 61505060  | 3442          | 0.304    | 1        | 1         | 3.783E-02 | 4.112E-02 | PB-CAG-SD  |
| LARGE      | like glycosyltransferase [Source:HGNC Symbol;Acc:6511]                                                                                    | chr22 | 33668847  | 34323329  | 3368          | 0.308    | 1        | 1         | 3.875E-02 | 4.206E-02 | PB-CAG-SD  |
| KCNH7      | potassium voltage-gated channel, subfamily H (eag-related), member 7 [Source:HGNC Symbol;Acc:18863]                                       | chr2  | 163227917 | 163700240 | 4495          | 0.315    | 1        | 1         | 4.023E-02 | 4.359E-02 | PB-CAG-SD  |
| PDE4B      | phosphodiesterase 4B, cAMP-specific [Source:HGNC Symbol;Acc:8781]                                                                         | chr1  | 66253197  | 66840259  | 4562          | 0.316    | 1        | 1         | 4.061E-02 | 4.394E-02 | PB-CAG-SD  |
| FGF14      | fibroblast growth factor 14 [Source:HGNC Symbol;Acc:36711]                                                                                | chr13 | 102372134 | 103059124 | 5774          | 0.319    | 1        | 1         | 4.132E-02 | 4.464E-02 | PB-CAG-SD  |
| MEF2C-AS1  | MEF2C antisense RNA 1 [Source:HGNC Symbol;Acc:48908]                                                                                      | chr5  | 88174145  | 88762215  | 5171          | 0.335    | 1        | 1         | 4.500E-02 | 4.863E-02 | PB-CAG-SD  |
| ULK4       | unc-51 like kinase 4 [Source:HGNC Symbol;Acc:15784]                                                                                       | chr3  | 41288900  | 42008922  | 4978          | 0.336    | 1        | 1         | 4.534E-02 | 4.883E-02 | PB-CAG-SD  |
| PTPRK      | protein tyrosine phosphatase, receptor type, K [Source:HGNC Symbol;Acc:9674]                                                              | chr6  | 128289924 | 128848870 | 5295          | 0.337    | 1        | 1         | 4.546E-02 | 4.895E-02 | PB-CAG-SD  |
| RG58       | regulator of G-protein signaling 8 [Source:HGNC Symbol;Acc:10002]                                                                         | chr14 | 72304156  | 73030654  | 3868          | 0.339    | 1        | 1         | 4.594E-02 | 4.932E-02 | PB-CAG-SD  |

**Table S1. Genes with significant transposon integrations in DLD-1 KRAS<sup>G12S</sup> cells after selection in low glucose medium.** Two libraries were generated by mutagenesis with gene trap (PB-GT) and two by promoter containing (PB-CAG-SD) transposon constructs followed by serial selection in low glucose and hygromycin. Gene IDs, descriptions and chromosomal locations were obtained from Ensembl. The number of TTAAs sites corresponds to intronic TTAAs sites in case of PB-GT and also includes TTAAs sites within 5 kb of the gene for PB-CAG-SD transposon libraries. Expected, the number of expected random integrations; Observed, the number of independent integration sites observed by sequencing of splinkerette PCR products from the libraries; Libraries, number of libraries (out of 2) containing integrations in the gene; P, P value calculated using Poisson statistics; FDR, False Discovery Rate correction for multiple testing. An FDR adjusted P value <0.05 was used as cutoff for selecting significant genes.



table S2. Genes with significant transposon integrations in RKO BRAF<sup>WT</sup> cells after selection in low glucose medium

| Gene ID    | Description                                                                                                          | Chrom | Start     | End       | # TTAAs sites | Expected | Observed | Libraries | P         | FDR       | Transposon |
|------------|----------------------------------------------------------------------------------------------------------------------|-------|-----------|-----------|---------------|----------|----------|-----------|-----------|-----------|------------|
| SFTA1P     | surfactant associated 1, pseudogene [Source:HGNC Symbol;Acc:18383]                                                   | chr10 | 10826400  | 10836943  | 79            | 0.028    | 6        | 1         | 2.685E-15 | 7.629E-12 | PB-GT      |
| ZNF721     | zinc finger protein 721 [Source:HGNC Symbol;Acc:13068]                                                               | chr10 | 32672046  | 32697350  | 130           | 0.031    | 6        | 2         | 5.440E-15 | 1.737E-12 | PB-GT      |
| VMP1       | vacuole membrane protein 1 [Source:HGNC Symbol;Acc:29355]                                                            | chr17 | 57784553  | 57919816  | 1005          | 0.509    | 12       | 2         | 1.554E-14 | 4.85E-11  | PB-GT      |
| LINC00472  | long intergenic non-protein coding RNA 472 [Source:HGNC Symbol;Acc:21380]                                            | chr6  | 72054047  | 72130427  | 706           | 0.243    | 9        | 1         | 1.155E-13 | 1.113E-10 | PB-GT      |
| RRP16      | ribosomal RNA processing 15 homolog (S. cerevisiae) [Source:HGNC Symbol;Acc:24255]                                   | chr1  | 218458629 | 218511325 | 476           | 0.169    | 7        | 2         | 1.419E-11 | 8.124E-09 | PB-GT      |
| DLGAP1-AS2 | DLGAP1 antisense RNA 2 [Source:HGNC Symbol;Acc:28146]                                                                | chr1  | 3602986   | 3608334   | 29            | 0.007    | 2        | 2         | 9.643E-11 | 4.931E-08 | PB-GT      |
| CRIM1      | cysteine rich transmembrane BMP regulator 1 (chordin-like) [Source:HGNC Symbol;Acc:23559]                            | chr2  | 36583069  | 36778278  | 1464          | 0.419    | 8        | 2         | 4.776E-10 | 3.058E-07 | PB-GT      |
| ELOVL1     | ELOVL fatty acid elongase 1 [Source:HGNC Symbol;Acc:14418]                                                           | chr1  | 43829068  | 43833696  | 5             | 0.002    | 2        | 1         | 9.307E-10 | 3.331E-07 | PB-GT      |
| FEZ2       | fasciculation and elongation protein zeta 2 (zigin II) [Source:HGNC Symbol;Acc:3660]                                 | chr2  | 36778570  | 36873230  | 675           | 0.193    | 6        | 2         | 1.674E-09 | 4.559E-07 | PB-GT      |
| DOLK1      | doubtful kinase 1 [Source:HGNC Symbol;Acc:2700]                                                                      | chr19 | 24187160  | 24197543  | 20            | 0.007    | 2        | 1         | 1.740E-09 | 6.559E-07 | PB-GT      |
| PABPC1     | poly(A) binding protein, cytoplasmic 1 [Source:HGNC Symbol;Acc:8554]                                                 | chr8  | 101698044 | 101703507 | 308           | 0.106    | 5        | 2         | 1.752E-09 | 4.559E-07 | PB-GT      |
| HOXB8      | homeobox B8 [Source:HGNC Symbol;Acc:5119]                                                                            | chr17 | 46688739  | 46692478  | 6             | 0.003    | 2        | 2         | 4.688E-09 | 1.114E-06 | PB-GT      |
| EIF3J      | eukaryotic translation initiation factor 3, subunit J [Source:HGNC Symbol;Acc:3270]                                  | chr15 | 44829255  | 44885227  | 175           | 0.061    | 4        | 2         | 6.141E-09 | 1.457E-06 | PB-GT      |
| AVPR2      | arginine vasopressin receptor 2 [Source:HGNC Symbol;Acc:897]                                                         | chr1  | 36345478  | 36705443  | 2630          | 0.639    | 9        | 2         | 1.482E-08 | 1.070E-05 | PB-GT      |
| RNA28S5    | RNA, 28S ribosomal S5 [Source:HGNC Symbol;Acc:37659]                                                                 | chrX  | 108297361 | 108297792 | 1             | 0.000    | 1        | 1         | 1.388E-08 | 2.584E-06 | PB-GT      |
| SET        | SET nuclear oncogene [Source:HGNC Symbol;Acc:10760]                                                                  | chr9  | 131445703 | 131458679 | 65            | 0.024    | 3        | 2         | 1.444E-08 | 2.584E-06 | PB-GT      |
| ADAMTSL1   | ADAMTSL1 [Source:HGNC Symbol;Acc:14632]                                                                              | chr9  | 14873892  | 148910948 | 3065          | 1.150    | 10       | 2         | 4.068E-08 | 6.848E-06 | PB-GT      |
| NUDT8      | nudix (nucleoside diphosphate linked moiety X)-type motif 8 [Source:HGNC Symbol;Acc:8055]                            | chr11 | 67395409  | 67397401  | 1             | 0.000    | 1        | 1         | 6.019E-08 | 9.070E-06 | PB-GT      |
| PCNPP3     | PEST containing nuclear protein pseudogene 3 [Source:HGNC Symbol;Acc:41975]                                          | chr12 | 66039772  | 66040263  | 1             | 0.000    | 1        | 1         | 7.327E-08 | 1.028E-05 | PB-GT      |
| SETD5-AS1  | SETD5 antisense RNA 1 [Source:HGNC Symbol;Acc:44478]                                                                 | chr3  | 9391373   | 9440223   | 324           | 0.100    | 4        | 2         | 7.544E-08 | 1.028E-05 | PB-GT      |
| B5G        | basigin (Ok blood group) [Source:HGNC Symbol;Acc:41956]                                                              | chr19 | 571257    | 583493    | 15            | 0.008    | 2        | 2         | 8.216E-08 | 1.099E-05 | PB-GT      |
| RPLP0      | ribosomal protein, large, P0 [Source:HGNC Symbol;Acc:10371]                                                          | chr12 | 120634489 | 120639038 | 22            | 0.008    | 2        | 1         | 8.977E-08 | 1.188E-05 | PB-GT      |
| ZNF397     | zinc finger protein 397 [Source:HGNC Symbol;Acc:18818]                                                               | chr18 | 32820994  | 32847097  | 166           | 0.040    | 3        | 2         | 1.008E-07 | 1.188E-05 | PB-GT      |
| LYPD6B     | LYPD6B domain containing 6B [Source:HGNC Symbol;Acc:27018]                                                           | chr2  | 149694621 | 150071776 | 1242          | 0.355    | 6        | 2         | 1.038E-07 | 1.188E-05 | PB-GT      |
| RNA5-8SP4  | RNA, 5.8S ribosomal pseudogene 4 [Source:HGNC Symbol;Acc:41956]                                                      | chr2  | 24187160  | 24197543  | 20            | 0.007    | 2        | 1         | 1.532E-07 | 1.937E-05 | PB-GT      |
| LAMTOR3    | late endosomal/lysosomal adaptor, MAPK and TOR activator 3 [Source:HGNC Symbol;Acc:15606]                            | chr4  | 100799493 | 100815547 | 162           | 0.046    | 3        | 2         | 1.778E-07 | 1.855E-05 | PB-GT      |
| EIF4A2P4   | eukaryotic translation initiation factor 4A2 pseudogene 4 [Source:HGNC Symbol;Acc:45017]                             | chrX  | 52861754  | 52862949  | 4             | 0.001    | 1        | 1         | 2.202E-07 | 2.270E-05 | PB-GT      |
| ASBP1      | ankyrin repeat and SOCS box containing protein pseudogene 1 [Source:HGNC Symbol;Acc:20121]                           | chr15 | 93338877  | 93396969  | 2             | 0.001    | 1        | 1         | 2.418E-07 | 2.322E-05 | PB-GT      |
| ATAD2      | ATPase family, AAA domain containing 2 [Source:HGNC Symbol;Acc:30123]                                                | chr8  | 124332090 | 124426590 | 715           | 0.245    | 5        | 2         | 2.345E-07 | 2.322E-05 | PB-GT      |
| RNV5       | RNase-associated Y5 [Source:HGNC Symbol;Acc:10249]                                                                   | chr7  | 148638950 | 148638950 | 2             | 0.001    | 1        | 1         | 2.736E-07 | 2.545E-05 | PB-GT      |
| USP11      | ubiquitin specific peptidase 11 [Source:HGNC Symbol;Acc:12609]                                                       | chrX  | 47092089  | 47107727  | 2             | 0.012    | 2        | 1         | 2.852E-07 | 2.551E-05 | PB-GT      |
| HOXA9      | homeobox A9 [Source:HGNC Symbol;Acc:5109]                                                                            | chr7  | 27202054  | 27210117  | 34            | 0.013    | 2        | 1         | 3.323E-07 | 2.883E-05 | PB-GT      |
| THUMP3     | THUMP domain containing 3 [Source:HGNC Symbol;Acc:24493]                                                             | chr3  | 9404526   | 9428475   | 177           | 0.054    | 3        | 2         | 3.506E-07 | 2.952E-05 | PB-GT      |
| POE7B      | phosphodiesterase 7B [Source:HGNC Symbol;Acc:8792]                                                                   | chr8  | 186172634 | 186187112 | 2575          | 0.865    | 8        | 2         | 4.134E-07 | 3.981E-05 | PB-GT      |
| HIST2H2BC  | histone cluster 2, H2bc (pseudogene) [Source:HGNC Symbol;Acc:20516]                                                  | chr1  | 149821760 | 149822339 | 3             | 0.001    | 1        | 1         | 5.667E-07 | 4.385E-05 | PB-GT      |
| ENO1-AS1   | ENO1 antisense RNA 1 [Source:HGNC Symbol;Acc:40214]                                                                  | chr1  | 8938894   | 8939953   | 3             | 0.001    | 1        | 1         | 5.667E-07 | 4.385E-05 | PB-GT      |
| BRWD1-1T2  | BRWD1 intronic transcript 2 (non-protein coding) [Source:HGNC Symbol;Acc:16423]                                      | chr21 | 140685887 | 140685887 | 4             | 0.001    | 1        | 1         | 6.544E-07 | 4.831E-05 | PB-GT      |
| LYPLA1     | lysophosphatidase-like 1 [Source:HGNC Symbol;Acc:20440]                                                              | chr2  | 219347166 | 219347166 | 450           | 0.128    | 2        | 2         | 7.698E-07 | 6.114E-05 | PB-GT      |
| EIF4A2     | eukaryotic translation initiation factor 4A2 [Source:HGNC Symbol;Acc:3284]                                           | chr3  | 186500994 | 186507689 | 57            | 0.018    | 2        | 1         | 8.887E-07 | 6.114E-05 | PB-GT      |
| MAGIX      | MAGI family member, X-linked [Source:HGNC Symbol;Acc:30066]                                                          | chrX  | 49019061  | 49024822  | 8             | 0.001    | 1        | 1         | 8.875E-07 | 6.114E-05 | PB-GT      |
| MTIX       | metallothionein 1X [Source:HGNC Symbol;Acc:7405]                                                                     | chr16 | 56716336  | 56716108  | 4             | 0.001    | 1        | 1         | 8.899E-07 | 6.114E-05 | PB-GT      |
| ZNF132P    | zinc finger protein 123, pseudogene [Source:HGNC Symbol;Acc:12906]                                                   | chr12 | 129165161 | 129165161 | 181           | 0.001    | 1        | 1         | 6.824E-07 | 6.114E-05 | PB-GT      |
| DNAJC9     | DnaJ (Hsp40) homolog, subfamily C, member 9 [Source:HGNC Symbol;Acc:19123]                                           | chr10 | 74943120  | 75008620  | 471           | 0.168    | 4        | 2         | 9.724E-07 | 6.328E-05 | PB-GT      |
| PFKM       | phosphofructokinase, muscle [Source:HGNC Symbol;Acc:8877]                                                            | chr12 | 48489822  | 48540187  | 186           | 0.071    | 3        | 1         | 1.012E-06 | 6.440E-05 | PB-GT      |
| MCOLN3     | mucopolysaccharide 3 [Source:HGNC Symbol;Acc:15358]                                                                  | chr1  | 85483765  | 85514182  | 204           | 0.072    | 3        | 2         | 1.082E-06 | 6.731E-05 | PB-GT      |
| RRP19      | ribosomal protein S19 [Source:HGNC Symbol;Acc:10402]                                                                 | chr4  | 42378984  | 42378984  | 3             | 0.001    | 1        | 1         | 1.132E-06 | 6.731E-05 | PB-GT      |
| RPL17P43   | ribosomal protein L17 pseudogene 43 [Source:HGNC Symbol;Acc:35996]                                                   | chr17 | 19400256  | 19400814  | 3             | 0.002    | 1        | 1         | 1.153E-06 | 6.740E-05 | PB-GT      |
| RNA5E1     | ribonuclease, RNase K [Source:HGNC Symbol;Acc:33911]                                                                 | chr17 | 6915736   | 6917851   | 3             | 0.002    | 1        | 1         | 1.232E-06 | 6.740E-05 | PB-GT      |
| UCA1       | uracil carboxylase associated 1 (non-protein coding) [Source:HGNC Symbol;Acc:37126]                                  | chr19 | 15939757  | 15947100  | 37            | 0.020    | 2        | 1         | 1.222E-06 | 6.999E-05 | PB-GT      |
| TT12       | TE12 interacting protein 2 [Source:HGNC Symbol;Acc:26262]                                                            | chr19 | 33339979  | 33371119  | 232           | 0.085    | 3        | 2         | 1.561E-06 | 9.307E-05 | PB-GT      |
| LINC00102  | long intergenic non-protein coding RNA 102 [Source:HGNC Symbol;Acc:30470]                                            | chrX  | 2531029   | 2533388   | 11            | 0.002    | 1        | 1         | 1.677E-06 | 8.856E-05 | PB-GT      |
| WDR85      | WD repeat domain 85 [Source:HGNC Symbol;Acc:25199]                                                                   | chr9  | 140449356 | 140473387 | 58            | 0.022    | 2        | 1         | 1.688E-06 | 8.856E-05 | PB-GT      |
| CK2S       | CDC28 protein kinase regulatory subunit 2 [Source:HGNC Symbol;Acc:2000]                                              | chr9  | 91926113  | 91931618  | 58            | 0.022    | 2        | 1         | 1.688E-06 | 8.856E-05 | PB-GT      |
| HYAL2      | hyaluronidase 2 [Source:HGNC Symbol;Acc:3321]                                                                        | chr1  | 635523    | 635523    | 6             | 0.003    | 1        | 1         | 1.701E-06 | 9.856E-05 | PB-GT      |
| ATP5A1P7   | ATP synthase, H+ transporting, mitochondrial F1 complex, alpha subunit 1 pseudogene 7 [Source:HGNC Symbol;Acc:37665] | chr9  | 46998213  | 46999941  | 5             | 0.002    | 1        | 1         | 1.756E-06 | 8.890E-05 | PB-GT      |
| TEX29      | testis expressed 29 [Source:HGNC Symbol;Acc:20370]                                                                   | chr13 | 111996831 | 111996586 | 93            | 0.023    | 2        | 2         | 1.886E-06 | 9.475E-05 | PB-GT      |
| CHCHD10    | coiled-coil-helix-coiled-coil-helix domain containing 10 [Source:HGNC Symbol;Acc:15558]                              | chr22 | 24108021  | 24110630  | 4             | 0.002    | 1        | 1         | 1.994E-06 | 9.944E-05 | PB-GT      |
| CM1RT7     | CM1RT7 antisense RNA 7 (non-protein coding) [Source:HGNC Symbol;Acc:14386]                                           | chr1  | 6498599   | 6498599   | 4             | 0.003    | 1        | 1         | 2.086E-06 | 9.944E-05 | PB-GT      |
| PIGA       | phosphatidylinositol glycan anchor biosynthesis, class A [Source:HGNC Symbol;Acc:8957]                               | chrX  | 15337573  | 15353766  | 140           | 0.023    | 2        | 1         | 2.079E-06 | 9.919E-05 | PB-GT      |
| OR21P      | olfactory receptor, family 2, subfamily U, member 1 pseudogene [Source:HGNC Symbol;Acc:8278]                         | chr6  | 29230480  | 29231856  | 6             | 0.002    | 1        | 1         | 2.121E-06 | 9.955E-05 | PB-GT      |
| TUSC3      | tumor suppressor candidate 3 [Source:HGNC Symbol;Acc:17034]                                                          | chr3  | 50354758  | 50365682  | 7             | 0.002    | 1        | 1         | 2.131E-06 | 1.048E-04 | PB-GT      |
| LINC00526  | long intergenic non-protein coding RNA 526 [Source:HGNC Symbol;Acc:28278]                                            | chr7  | 42367023  | 42367023  | 1             | 0.000    | 1        | 1         | 2.202E-06 | 1.048E-04 | PB-GT      |
| WBFS       | WW domain binding protein 5 [Source:HGNC Symbol;Acc:30084]                                                           | chrX  | 102611373 | 102613087 | 13            | 0.002    | 1        | 1         | 2.342E-06 | 1.048E-04 | PB-GT      |
| PDS51      | prenyl (dibenzoyl) diphosphate synthase, subunit 1 [Source:HGNC Symbol;Acc:17759]                                    | chr10 | 26985868  | 27035277  | 261           | 0.093    | 3        | 2         | 2.912E-06 | 1.283E-04 | PB-GT      |
| PABPC4     | poly(A) binding protein, cytoplasmic 4 (inducible form) [Source:HGNC Symbol;Acc:8557]                                | chr1  | 40426488  | 40426482  | 74            | 0.026    | 2        | 2         | 2.962E-06 | 1.283E-04 | PB-GT      |
| C12orf29   | chromosome 12 open reading frame 229 [Source:HGNC Symbol;Acc:33759]                                                  | chr12 | 241275462 | 241275462 | 7             | 0.003    | 1        | 1         | 3.011E-06 | 1.311E-04 | PB-GT      |
| C22orf15   | chromosome 22 open reading frame 15 [Source:HGNC Symbol;Acc:15558]                                                   | chr22 | 24105208  | 24108048  | 5             | 0.002    | 1        | 1         | 3.115E-06 | 1.311E-04 | PB-GT      |
| EXOSC8     | exosome component 8 [Source:HGNC Symbol;Acc:17035]                                                                   | chr13 | 37572953  | 37583750  | 114           | 0.028    | 2        | 1         | 3.461E-06 | 1.421E-04 | PB-GT      |
| ALKH6      | alkB, alkylation repair homolog 6 (E. coli) [Source:HGNC Symbol;Acc:28243]                                           | chr19 | 36500022  | 3650514   | 5             | 0.003    | 1        | 1         | 3.474E-06 | 1.421E-04 | PB-GT      |
| T8XB       | T8XB [Source:HGNC Symbol;Acc:11608]                                                                                  | chr16 | 3007114   | 3007114   | 3             | 0.003    | 1        | 1         | 3.485E-06 | 1.445E-04 | PB-GT      |
| GPNMB      | glycoprotein (transmembrane) nmb [Source:HGNC Symbol;Acc:4462]                                                       | chr7  | 23275586  | 23291477  | 270           | 0.100    | 3        | 2         | 3.889E-06 | 1.545E-04 | PB-GT      |
| MIS18A-AS1 | MIS18A antisense RNA 1 [Source:HGNC Symbol;Acc:40106]                                                                | chr21 | 33650174  | 33653299  | 10            | 0.003    | 1        | 1         | 4.408E-06 | 1.602E-04 | PB-GT      |
| RBM6       | RNA binding motif protein 6 [Source:HGNC Symbol;Acc:9903]                                                            | chr3  | 49977440  | 50137478  | 748           | 0.230    | 4        | 2         | 4.440E-06 | 1.718E-04 | PB-GT      |
| NCRF2-AS1  | NCRF2 antisense RNA 1 [Source:HGNC Symbol;Acc:40268]                                                                 | chr1  | 199629748 | 199629748 | 10            | 0.003    | 1        | 1         | 4.702E-06 | 1.795E-04 | PB-GT      |
| IFRD2      | interferon-related developmental regulator 2 [Source:HGNC Symbol;Acc:5457]                                           | chr3  | 50325163  | 50330349  | 10            | 0.003    | 1        | 1         | 4.722E-06 | 1.795E-04 | PB-GT      |
| RRS1       | RRS1 ribosome biogenesis regulator homolog (S. cerevisiae) [Source:HGNC Symbol;Acc:17083]                            | chr8  | 67341263  | 67342966  | 9             | 0.003    | 1        | 1         | 4.744E-06 | 1.795E-04 | PB-GT      |
| EC12       | epithelial cell transforming sequence 2 oncogene [Source:HGNC Symbol;Acc:3155]                                       | chr3  | 17248472  | 172536204 | 760           | 0.234    | 4        | 2         | 4.793E-06 | 1.795E-04 | PB-GT      |
| INC080B    | inc080b complex subunit 8 [Source:HGNC Symbol;Acc:13324]                                                             | chr1  | 7482811   | 7482811   | 11            | 0.003    | 1        | 1         | 4.937E-06 | 1.795E-04 | PB-GT      |
| ID3        | inhibitor of DNA binding 3, dominant negative helix-loop-helix protein [Source:HGNC Symbol;Acc:5362]                 | chr   |           |           |               |          |          |           |           |           |            |

table S2. Genes with significant transposon integrations in RKO BRAF<sup>WT</sup> cells after selection in low glucose medium

| Gene ID   | Description                                                                                             | Chrom | Start     | End       | # TAA sites | Expected | Observed | Libraries | P         | FDR       | Transposon |
|-----------|---------------------------------------------------------------------------------------------------------|-------|-----------|-----------|-------------|----------|----------|-----------|-----------|-----------|------------|
| RPL7A     | ribosomal protein L7a [Source:HGNC Symbol:Acc:10364]                                                    | chr9  | 136215069 | 136218281 | 18          | 0.007    | 1        | 1         | 2.289E-05 | 4.673E-04 | PG-GT      |
| RBM4      | RNA binding motif protein 5 [Source:HGNC Symbol:Acc:9902]                                               | chr3  | 50135332  | 50135544  | 171         | 0.053    | 2        | 1         | 2.323E-05 | 3.760E-04 | PG-GT      |
| ANKZF1    | ankyrin repeat and zinc finger domain containing 1 [Source:HGNC Symbol:Acc:25527]                       | chr2  | 220094479 | 220101391 | 24          | 0.007    | 1        | 1         | 2.344E-05 | 4.760E-04 | PG-GT      |
| CXD2      | caudal type homeobox 2 [Source:HGNC Symbol:Acc:1806]                                                    | chr13 | 28536274  | 28545276  | 29          | 0.007    | 1        | 1         | 2.467E-05 | 4.974E-04 | PG-GT      |
| FAM86BK   | family with sequence similarity 86, member K, pseudogene [Source:HGNC Symbol:Acc:44098]                 | chr4  | 9155022   | 9167177   | 25          | 0.007    | 1        | 1         | 2.493E-05 | 4.976E-04 | PG-GT      |
| RPL19     | ribosomal protein L19 [Source:HGNC Symbol:Acc:10312]                                                    | chr17 | 37350990  | 37350990  | 14          | 0.007    | 1        | 1         | 2.503E-05 | 4.976E-04 | PG-GT      |
| PTRH1     | peptidyl-HRNA hydrolase domain containing 1 [Source:HGNC Symbol:Acc:33782]                              | chr2  | 25012855  | 25016251  | 25          | 0.007    | 1        | 1         | 2.543E-05 | 5.022E-04 | PG-GT      |
| AP1S2     | adaptor-related protein complex 1, sigma 2 subunit [Source:HGNC Symbol:Acc:560]                         | chrX  | 15843929  | 15873054  | 328         | 0.055    | 2        | 1         | 2.611E-05 | 5.120E-04 | PG-GT      |
| NUDT13    | nucleoside diphosphate linked moiety X-type motif 13 [Source:HGNC Symbol:Acc:18827]                     | chr10 | 74870217  | 74891586  | 154         | 0.055    | 2        | 2         | 2.655E-05 | 5.172E-04 | PG-GT      |
| COX6C     | cytochrome c oxidase subunit VIc [Source:HGNC Symbol:Acc:2285]                                          | chr1  | 99745330  | 99753567  | 21          | 0.008    | 1        | 1         | 3.025E-05 | 5.568E-04 | PG-GT      |
| GATA6     | GATA binding protein 6 [Source:HGNC Symbol:Acc:414]                                                     | chr18 | 19749404  | 19782491  | 231         | 0.055    | 2        | 1         | 2.708E-05 | 5.203E-04 | PG-GT      |
| PSMA3     | proteasome (prosome, macropain) subunit, alpha type, 3 [Source:HGNC Symbol:Acc:9532]                    | chr14 | 58711549  | 58738730  | 206         | 0.056    | 2        | 2         | 2.787E-05 | 5.320E-04 | PG-GT      |
| RCD1      | RC1 domain containing 1 [Source:HGNC Symbol:Acc:30457]                                                  | chr15 | 91498100  | 91506349  | 22          | 0.008    | 1        | 1         | 2.912E-05 | 5.521E-04 | PG-GT      |
| LAMTOR4   | late endosomal lysosomal adaptor, MAPK and TOR activator 4 [Source:HGNC Symbol:Acc:33772]               | chr7  | 10085428  | 10090230  | 161         | 0.055    | 2        | 1         | 2.984E-05 | 5.192E-04 | PG-GT      |
| NSUNE     | NOP2/Sun domain family, member 5 [Source:HGNC Symbol:Acc:16385]                                         | chr7  | 72716514  | 72722864  | 21          | 0.008    | 1        | 1         | 3.025E-05 | 5.568E-04 | PG-GT      |
| GIMAP6    | GTPase, IMAP family member 6 [Source:HGNC Symbol:Acc:21918]                                             | chr7  | 150322463 | 150329473 | 21          | 0.008    | 1        | 1         | 3.025E-05 | 5.568E-04 | PG-GT      |
| MIP       | migration and invasion inhibitory protein [Source:HGNC Symbol:Acc:25715]                                | chr1  | 12079523  | 12092102  | 22          | 0.008    | 1        | 1         | 3.034E-05 | 5.568E-04 | PG-GT      |
| TC1H1     | trichostatin A [Source:HGNC Symbol:Acc:1791]                                                            | chr1  | 152078793 | 15208556  | 22          | 0.008    | 1        | 1         | 3.034E-05 | 5.568E-04 | PG-GT      |
| ZNF576    | zinc finger protein 576 [Source:HGNC Symbol:Acc:28357]                                                  | chr19 | 44100544  | 44105309  | 15          | 0.008    | 1        | 1         | 3.116E-05 | 5.621E-04 | PG-GT      |
| BBC3      | BCL2 like domain containing 3 [Source:HGNC Symbol:Acc:17868]                                            | chr19 | 47724081  | 47736024  | 15          | 0.008    | 1        | 1         | 3.116E-05 | 5.621E-04 | PG-GT      |
| SLCY      | selenocysteine lyase [Source:HGNC Symbol:Acc:18161]                                                     | chr2  | 238999530 | 239008054 | 203         | 0.058    | 2        | 2         | 3.122E-05 | 5.621E-04 | PG-GT      |
| HRX       | hemophan [Source:HGNC Symbol:Acc:5171]                                                                  | chr11 | 6452279   | 6463947   | 23          | 0.008    | 1        | 1         | 3.168E-05 | 5.833E-04 | PG-GT      |
| ACP2      | acid phosphatase 2, lysosomal [Source:HGNC Symbol:Acc:123]                                              | chr11 | 47250853  | 47270457  | 23          | 0.008    | 1        | 1         | 3.168E-05 | 5.833E-04 | PG-GT      |
| BIRC6-AS1 | BIRC6 antisense RNA 1 [Source:HGNC Symbol:Acc:40641]                                                    | chr2  | 32602699  | 32604667  | 28          | 0.008    | 1        | 1         | 3.189E-05 | 5.835E-04 | PG-GT      |
| KRR1      | KRR1, small subunit (SSU) processome component, homolog (yeast) [Source:HGNC Symbol:Acc:5176]           | chr12 | 75890684  | 75905416  | 154         | 0.059    | 2        | 1         | 3.289E-05 | 5.741E-04 | PG-GT      |
| KDEL2C    | KDEL-like small subunit 2 [Source:HGNC Symbol:Acc:28496]                                                | chr11 | 108342623 | 108350788 | 56          | 0.009    | 1        | 1         | 3.389E-05 | 6.728E-04 | PG-GT      |
| PEX2      | peroxisomal biogenesis factor 2 [Source:HGNC Symbol:Acc:9717]                                           | chr8  | 77892494  | 77913260  | 175         | 0.060    | 2        | 2         | 3.435E-05 | 5.948E-04 | PG-GT      |
| COA4      | cytochrome c oxidase assembly factor 4 homolog (S. cerevisiae) [Source:HGNC Symbol:Acc:24604]           | chr11 | 73583712  | 73588033  | 24          | 0.008    | 1        | 1         | 3.449E-05 | 5.948E-04 | PG-GT      |
| ZNF225    | zinc finger protein 225 [Source:HGNC Symbol:Acc:13018]                                                  | chr19 | 44616334  | 44637027  | 115         | 0.061    | 2        | 1         | 3.559E-05 | 6.101E-04 | PG-GT      |
| C7orf25   | chromosome 7 open reading frame 25 [Source:HGNC Symbol:Acc:21703]                                       | chr7  | 42948325  | 42951904  | 23          | 0.009    | 1        | 1         | 3.627E-05 | 6.180E-04 | PG-GT      |
| RRP1      | ribosomal RNA processing 1 homolog (S. cerevisiae) [Source:HGNC Symbol:Acc:18785]                       | chr21 | 45293994  | 45295134  | 5           | 0.009    | 1        | 1         | 3.686E-05 | 6.443E-04 | PG-GT      |
| CDC8B     | coiled-coil domain containing 8B [Source:HGNC Symbol:Acc:28359]                                         | chr11 | 60095944  | 60098145  | 20          | 0.009    | 1        | 1         | 3.741E-05 | 6.300E-04 | PG-GT      |
| HOBX7     | homeobox B7 [Source:HGNC Symbol:Acc:5118]                                                               | chr17 | 46848494  | 46742385  | 123         | 0.062    | 2        | 2         | 3.847E-05 | 6.441E-04 | PG-GT      |
| RPL17     | ribosomal protein L17 [Source:HGNC Symbol:Acc:10307]                                                    | chr18 | 47014851  | 47016893  | 37          | 0.009    | 1        | 1         | 3.903E-05 | 6.443E-04 | PG-GT      |
| EXOC8     | exocyst complex component 8 [Source:HGNC Symbol:Acc:24659]                                              | chr1  | 23148489  | 23147698  | 5           | 0.009    | 1        | 1         | 3.915E-05 | 6.443E-04 | PG-GT      |
| RAD23B    | RAD23 homolog B (S. cerevisiae) [Source:HGNC Symbol:Acc:9813]                                           | chr9  | 110045418 | 110094475 | 484         | 0.182    | 3        | 2         | 3.916E-05 | 6.443E-04 | PG-GT      |
| YARS      | tyrosyl-tRNA synthetase [Source:HGNC Symbol:Acc:12840]                                                  | chr1  | 33240840  | 33283754  | 177         | 0.063    | 2        | 2         | 3.944E-05 | 6.445E-04 | PG-GT      |
| CRP1      | coli inducible RNA binding protein [Source:HGNC Symbol:Acc:1982]                                        | chr19 | 1255394   | 1274879   | 17          | 0.009    | 1        | 1         | 3.999E-05 | 6.451E-04 | PG-GT      |
| ZNF865    | zinc finger protein 865 [Source:HGNC Symbol:Acc:3078]                                                   | chr19 | 8116775   | 8122935   | 17          | 0.009    | 1        | 1         | 3.999E-05 | 6.451E-04 | PG-GT      |
| DND1      | down-regulator of transcription 1, TRP-binding (negative cofactor 2) [Source:HGNC Symbol:Acc:3017]      | chr1  | 93811445  | 93828149  | 178         | 0.063    | 2        | 2         | 4.011E-05 | 6.451E-04 | PG-GT      |
| TRAPPC4   | trafficking protein particle complex 4 [Source:HGNC Symbol:Acc:19943]                                   | chr11 | 11888914  | 118890164 | 26          | 0.009    | 1        | 1         | 4.045E-05 | 6.470E-04 | PG-GT      |
| LINC00572 | long intergenic non-protein coding RNA 572 [Source:HGNC Symbol:Acc:43722]                               | chr13 | 30492784  | 30500788  | 36          | 0.009    | 1        | 1         | 4.230E-05 | 6.728E-04 | PG-GT      |
| RG32      | reticulon signaling 20 [Source:HGNC Symbol:Acc:14600]                                                   | chr6  | 54871863  | 54871863  | 4           | 0.009    | 1        | 1         | 4.273E-05 | 6.801E-04 | PG-GT      |
| CDC42EP5  | CDC42 effector protein (Rho GTPase binding) 5 [Source:HGNC Symbol:Acc:17408]                            | chr19 | 54976210  | 54984411  | 18          | 0.009    | 1        | 1         | 4.482E-05 | 7.029E-04 | PG-GT      |
| NUDT5     | nucleoside diphosphate linked moiety X-type motif 5 [Source:HGNC Symbol:Acc:8052]                       | chr10 | 12207324  | 12238143  | 184         | 0.066    | 2        | 2         | 4.493E-05 | 7.029E-04 | PG-GT      |
| LINC0184  | long intergenic non-protein coding RNA 184 [Source:HGNC Symbol:Acc:37132]                               | chr1  | 23476557  | 234770526 | 27          | 0.010    | 1        | 1         | 4.564E-05 | 7.036E-04 | PG-GT      |
| TMC3      | transmembrane domain and coiled-coil domain containing 3 [Source:HGNC Symbol:Acc:20399]                 | chr1  | 11414531  | 11420272  | 42          | 0.010    | 1        | 1         | 4.588E-05 | 7.036E-04 | PG-GT      |
| FAM68B1   | family with sequence similarity 86, member B1 [Source:HGNC Symbol:Acc:28268]                            | chr8  | 12039605  | 12051642  | 28          | 0.010    | 1        | 1         | 4.572E-05 | 7.036E-04 | PG-GT      |
| HIST1H3D  | histone cluster 1, H3d [Source:HGNC Symbol:Acc:4767]                                                    | chr6  | 26197088  | 26199521  | 28          | 0.010    | 1        | 1         | 4.596E-05 | 7.036E-04 | PG-GT      |
| ILK       | integrin-linked kinase [Source:HGNC Symbol:Acc:6040]                                                    | chr11 | 6024961   | 6032102   | 28          | 0.010    | 1        | 1         | 4.690E-05 | 7.081E-04 | PG-GT      |
| EIF1AD    | eukaryotic translation initiation factor 1A domain containing [Source:HGNC Symbol:Acc:28147]            | chr12 | 8571840   | 85769847  | 28          | 0.010    | 1        | 1         | 4.690E-05 | 7.081E-04 | PG-GT      |
| PDCD6IP   | programmed cell death 6 interacting protein [Source:HGNC Symbol:Acc:8766]                               | chr3  | 33839844  | 33911194  | 619         | 0.190    | 3        | 1         | 4.706E-05 | 7.091E-04 | PG-GT      |
| SERTAD1   | SERTA domain containing 1 [Source:HGNC Symbol:Acc:17932]                                                | chr19 | 40927499  | 40931932  | 19          | 0.010    | 1        | 1         | 4.992E-05 | 7.461E-04 | PG-GT      |
| MAPKAPK2  | mitogen-activated protein kinase-activated protein kinase 2 [Source:HGNC Symbol:Acc:6887]               | chr1  | 206858289 | 206907628 | 192         | 0.068    | 2        | 2         | 5.015E-05 | 7.461E-04 | PG-GT      |
| THY1      | thymocyte protein 1 [Source:HGNC Symbol:Acc:18633]                                                      | chr11 | 134118173 | 134121173 | 19          | 0.011    | 1        | 1         | 5.015E-05 | 7.461E-04 | PG-GT      |
| EIF4A1    | eukaryotic translation initiation factor 4A1 [Source:HGNC Symbol:Acc:3282]                              | chr17 | 7476024   | 7482323   | 20          | 0.010    | 1        | 1         | 5.097E-05 | 7.522E-04 | PG-GT      |
| ANXA4     | annexin A4 [Source:HGNC Symbol:Acc:542]                                                                 | chr2  | 69947923  | 70053596  | 682         | 0.195    | 3        | 2         | 5.160E-05 | 7.576E-04 | PG-GT      |
| HE52      | hairy and enhancer of split 2 (Drosophila) [Source:HGNC Symbol:Acc:16005]                               | chr1  | 6472478   | 6484730   | 29          | 0.010    | 1        | 1         | 5.279E-05 | 7.615E-04 | PG-GT      |
| PINK1-AS  | PINK1 antisense RNA [Source:HGNC Symbol:Acc:38872]                                                      | chr1  | 20989159  | 20989159  | 1           | 0.010    | 1        | 1         | 5.283E-05 | 7.615E-04 | PG-GT      |
| NOTCH2    | notch 2 [Source:HGNC Symbol:Acc:7882]                                                                   | chr1  | 120454176 | 120612240 | 1091        | 0.387    | 4        | 2         | 5.286E-05 | 7.615E-04 | PG-GT      |
| GLO1      | glyoxalase I [Source:HGNC Symbol:Acc:4323]                                                              | chr6  | 38643701  | 38670917  | 204         | 0.070    | 2        | 2         | 5.442E-05 | 7.824E-04 | PG-GT      |
| DDI1      | D-dopachrome tautomerase [Source:HGNC Symbol:Acc:2732]                                                  | chr22 | 24313554  | 24322860  | 21          | 0.010    | 1        | 1         | 5.465E-05 | 7.824E-04 | PG-GT      |
| RPL7      | ribosomal protein L7 [Source:HGNC Symbol:Acc:10363]                                                     | chr1  | 74202506  | 74202506  | 1           | 0.010    | 1        | 1         | 5.491E-05 | 7.846E-04 | PG-GT      |
| LINC00240 | long intergenic non-protein coding RNA 240 [Source:HGNC Symbol:Acc:18772]                               | chr6  | 26988232  | 26991703  | 31          | 0.011    | 1        | 1         | 5.630E-05 | 7.941E-04 | PG-GT      |
| GPR61     | G protein-coupled receptor 61 [Source:HGNC Symbol:Acc:13300]                                            | chr1  | 110082494 | 110091128 | 30          | 0.011    | 1        | 1         | 5.631E-05 | 7.941E-04 | PG-GT      |
| TMA16     | translational machinery associated 16 homolog (S. cerevisiae) [Source:HGNC Symbol:Acc:25638]            | chr4  | 164415594 | 164461691 | 252         | 0.071    | 2        | 1         | 5.739E-05 | 8.054E-04 | PG-GT      |
| RBM2B     | RNA binding motif protein 2B [Source:HGNC Symbol:Acc:10366]                                             | chr12 | 12795047  | 12798932  | 47          | 0.012    | 1        | 1         | 5.898E-05 | 8.242E-04 | PG-GT      |
| LICAM     | L1 cell adhesion molecule [Source:HGNC Symbol:Acc:6470]                                                 | chrX  | 153126999 | 153174677 | 66          | 0.011    | 1        | 1         | 6.002E-05 | 8.342E-04 | PG-GT      |
| GN2L1     | guanine nucleotide binding protein (G protein), beta polypeptide 2-like 1 [Source:HGNC Symbol:Acc:4399] | chr5  | 180663909 | 180675096 | 41          | 0.011    | 1        | 1         | 6.006E-05 | 8.381E-04 | PG-GT      |
| SLC44A4   | slow carrier family 44, member 4 [Source:HGNC Symbol:Acc:13941]                                         | chr6  | 31830969  | 31846823  | 33          | 0.011    | 1        | 1         | 6.378E-05 | 8.730E-04 | PG-GT      |
| FLAD1     | flavin adenine dinucleotide synthetase 1 [Source:HGNC Symbol:Acc:24671]                                 | chr1  | 154955817 | 154955817 | 1           | 0.011    | 1        | 1         | 6.403E-05 | 8.730E-04 | PG-GT      |
| TPRGL1    | tumor protein p63 regulated 1-like [Source:HGNC Symbol:Acc:27007]                                       | chr1  | 3541566   | 3546691   | 32          | 0.011    | 1        | 1         | 6.403E-05 | 8.730E-04 | PG-GT      |
| STX1B     | syntaxin 1B [Source:HGNC Symbol:Acc:18539]                                                              | chr16 | 31005577  | 31021499  | 34          | 0.011    | 1        | 1         | 6.437E-05 | 8.734E-04 | PG-GT      |
| SPRY1     | sprouty homolog 1, antagonist of FGF signaling (Drosophila) [Source:HGNC Symbol:Acc:11269]              | chr4  | 124317950 | 124324910 | 41          | 0.012    | 1        | 1         | 6.686E-05 | 8.987E-04 | PG-GT      |
| C10orf54  | chromosome 10 open reading frame 54 [Source:HGNC Symbol:Acc:24756]                                      | chr1  | 41248749  | 41248749  | 1           | 0.012    | 1        | 1         | 6.686E-05 | 8.987E-04 | PG-GT      |
| CHRA1C1   | chromatin accessibility complex 1 [Source:HGNC Symbol:Acc:13544]                                        | chr8  | 141521397 | 141527236 | 34          | 0.012    | 1        | 1         | 6.732E-05 | 9.006E-04 | PG-GT      |
| C4orf46   | chromosome 4 open reading frame 46 [Source:HGNC Symbol:Acc:27320]                                       | chr4  | 159587831 | 159593407 | 42          | 0.012    | 1        | 1         | 7.014E-05 | 9.341E-04 | PG-GT      |
| GHPR      | glyoxylate reductase/hydroxypyruvate reductase [Source:HGNC Symbol:Acc:4570]                            | chr9  | 37422663  | 37436987  | 32          | 0.012    | 1        | 1         | 7.146E-05 | 9.453E-04 | PG-GT      |
| VPS36     | vacuolar protein sorting 36 homolog (S. cerevisiae) [Source:HGNC Symbol:Acc:20312]                      | chr13 | 52928677  | 53024763  | 317         | 0.077    | 2        | 2         | 7.173E-05 |           |            |

table S2. Genes with significant transposon integrations in RKO BRAF<sup>WT</sup> cells after selection in low glucose medium

| Gene ID        | Description                                                                                                     | Chrom | Start     | End       | # TTAAs sites | Expected | Observed | Libraries | P          | FDR       | Transposon |
|----------------|-----------------------------------------------------------------------------------------------------------------|-------|-----------|-----------|---------------|----------|----------|-----------|------------|-----------|------------|
| DNAJC25        | DnaJ (Hsp40) homolog, subfamily C, member 25 [Source:HGNC Symbol;Acc:34187]                                     | chr9  | 114303332 | 114432508 | 266           | 0.096    | 2        | 1         | 1.373E-04  | 1.417E-03 | PEB-GT     |
| LINC00483      | lincRNA, protein coding RNA 483 [Source:HGNC Symbol;Acc:26030]                                                  | chr17 | 48383390  | 48344537  | 33            | 0.017    | 1        | 1         | 1.172E-04  | 1.373E-03 | PEB-GT     |
| OSGIN1         | oxidative stress induced growth inhibitor 1 [Source:HGNC Symbol;Acc:30093]                                      | chr16 | 83981887  | 83999937  | 50            | 0.117    | 1        | 1         | 1.387E-04  | 1.417E-03 | PEB-GT     |
| DIAPH3-AS2     | DIAPH3 antisense RNA 2 [Source:HGNC Symbol;Acc:39916]                                                           | chr13 | 60718832  | 60727639  | 69            | 0.017    | 1        | 1         | 1.388E-04  | 1.417E-03 | PEB-GT     |
| KLFB           | Kruppel-like factor 6 [Source:HGNC Symbol;Acc:2235]                                                             | chr10 | 3819188   | 3827473   | 47            | 0.017    | 1        | 1         | 1.391E-04  | 1.417E-03 | PEB-GT     |
| PEBP1          | phosphotyrosine binding protein 1 [Source:HGNC Symbol;Acc:8630]                                                 | chr12 | 118573863 | 11858339  | 44            | 0.017    | 1        | 1         | 1.403E-04  | 1.424E-03 | PEB-GT     |
| SLC1A5         | solute carrier family 1 (neutral amino acid transporter), member 5 [Source:HGNC Symbol;Acc:10943]               | chr19 | 47278140  | 47291851  | 32            | 0.017    | 1        | 1         | 1.410E-04  | 1.426E-03 | PEB-GT     |
| SFR1           | SWI5-dependent recombination repair 1 [Source:HGNC Symbol;Acc:29574]                                            | chr10 | 105881816 | 105886143 | 48            | 0.017    | 1        | 1         | 1.451E-04  | 1.462E-03 | PEB-GT     |
| MYO1C          | myosin IC [Source:HGNC Symbol;Acc:7597]                                                                         | chr17 | 1367392   | 1396106   | 34            | 0.017    | 1        | 1         | 1.468E-04  | 1.470E-03 | PEB-GT     |
| SAP18          | SIN3A-associated protein, 18kDa [Source:HGNC Symbol;Acc:10530]                                                  | chr16 | 21714653  | 2173222   | 65            | 0.017    | 1        | 1         | 1.469E-04  | 1.470E-03 | PEB-GT     |
| URGCP          | upregulator of cell proliferation [Source:HGNC Symbol;Acc:30890]                                                | chr7  | 43515493  | 43566010  | 265           | 0.098    | 2        | 2         | 1.475E-04  | 1.472E-03 | PEB-GT     |
| CALM1          | calmodulin 1 (phosphorylase kinase, delta) [Source:HGNC Symbol;Acc:1442]                                        | chr14 | 90862846  | 90874605  | 64            | 0.017    | 1        | 1         | 1.489E-04  | 1.480E-03 | PEB-GT     |
| LAMTOR5        | late endosomal/lysosomal adaptor, MAPK and MTOR activator 5 [Source:HGNC Symbol;Acc:17955]                      | chr1  | 110943871 | 110950564 | 49            | 0.017    | 1        | 1         | 1.495E-04  | 1.481E-03 | PEB-GT     |
| EZF2           | eukaryotic elongation factor 2 kinase [Source:HGNC Symbol;Acc:24615]                                            | chr2  | 22217603  | 22289554  | 296           | 0.099    | 2        | 1         | 1.509E-04  | 1.481E-03 | PEB-GT     |
| KIAA1967       | KIAA1967 [Source:HGNC Symbol;Acc:23360]                                                                         | chr8  | 22462145  | 22479027  | 51            | 0.017    | 1        | 1         | 1.509E-04  | 1.481E-03 | PEB-GT     |
| KCTD4          | potassium channel tetramerisation domain containing 4 [Source:HGNC Symbol;Acc:23227]                            | chr13 | 45766888  | 45775175  | 72            | 0.017    | 1        | 1         | 1.510E-04  | 1.481E-03 | PEB-GT     |
| AMOTL2         | angiominin like 2 [Source:HGNC Symbol;Acc:17812]                                                                | chr3  | 134074716 | 134094321 | 57            | 0.018    | 1        | 1         | 1.519E-04  | 1.485E-03 | PEB-GT     |
| DNAAF2         | dynein, axonemal, assembly factor 2 [Source:HGNC Symbol;Acc:20188]                                              | chr14 | 50091892  | 50110149  | 65            | 0.018    | 1        | 1         | 1.537E-04  | 1.495E-03 | PEB-GT     |
| CALCOCO1       | calcium binding and calico-coiled domain 1 [Source:HGNC Symbol;Acc:29306]                                       | chr12 | 54104903  | 54121529  | 47            | 0.018    | 1        | 1         | 1.600E-04  | 1.546E-03 | PEB-GT     |
| NUDT2          | nucleoside diphosphate linked moiety X-type motif 2 [Source:HGNC Symbol;Acc:8049]                               | chr4  | 34329504  | 34343979  | 48            | 0.018    | 1        | 1         | 1.601E-04  | 1.546E-03 | PEB-GT     |
| LINC50         | unc-50 homolog (C. elegans) [Source:HGNC Symbol;Acc:16046]                                                      | chr2  | 99225042  | 99234708  | 63            | 0.018    | 1        | 1         | 1.604E-04  | 1.546E-03 | PEB-GT     |
| RPL37          | ribosomal protein L37 [Source:HGNC Symbol;Acc:10347]                                                            | chr5  | 40823564  | 40835437  | 67            | 0.018    | 1        | 1         | 1.611E-04  | 1.547E-03 | PEB-GT     |
| BCAR1          | breast cancer anti-estrogen resistance 1 [Source:HGNC Symbol;Acc:971]                                           | chr16 | 75262928  | 75301951  | 54            | 0.018    | 1        | 1         | 1.617E-04  | 1.548E-03 | PEB-GT     |
| METTL2B        | methyltransferase like 2B [Source:HGNC Symbol;Acc:18272]                                                        | chr7  | 128095894 | 128146656 | 274           | 0.102    | 2        | 2         | 1.627E-04  | 1.553E-03 | PEB-GT     |
| SMPD4          | sphingomyelin phosphodiesterase 4, neutral membrane (neutral sphingomyelinase-3) [Source:HGNC Symbol;Acc:32949] | chr2  | 130909881 | 130940323 | 64            | 0.018    | 1        | 1         | 1.655E-04  | 1.574E-03 | PEB-GT     |
| HIF1R          | hypoxia-inducing factor 1 related [Source:HGNC Symbol;Acc:18415]                                                | chr13 | 128319000 | 128319000 | 46            | 0.017    | 1        | 1         | 1.688E-04  | 1.575E-03 | PEB-GT     |
| PSMD7          | proteasome (prosome, macropain) 25S subunit, non-ATPase, 7 [Source:HGNC Symbol;Acc:9565]                        | chr16 | 74330673  | 74340123  | 55            | 0.018    | 1        | 1         | 1.677E-04  | 1.575E-03 | PEB-GT     |
| CYB5B          | cytochrome b5 B (outer mitochondrial membrane) [Source:HGNC Symbol;Acc:24374]                                   | chr16 | 69458428  | 69500169  | 307           | 0.103    | 2        | 2         | 1.679E-04  | 1.575E-03 | PEB-GT     |
| TMEM69         | transmembrane protein 69 [Source:HGNC Symbol;Acc:28035]                                                         | chr1  | 46152886  | 46160115  | 52            | 0.018    | 1        | 1         | 1.683E-04  | 1.575E-03 | PEB-GT     |
| TSKAC          | TSK63 activating co-chaperone [Source:HGNC Symbol;Acc:30636]                                                    | chr1  | 156307105 | 156316786 | 52            | 0.018    | 1        | 1         | 1.683E-04  | 1.575E-03 | PEB-GT     |
| DKH16          | DEAH (Asp-Glu-Ala-His) box polypeptide 16 [Source:HGNC Symbol;Acc:2739]                                         | chr6  | 30620896  | 30649814  | 64            | 0.019    | 1        | 1         | 1.695E-04  | 1.585E-03 | PEB-GT     |
| FMNL1          | formin-like 1 [Source:HGNC Symbol;Acc:1212]                                                                     | chr17 | 43298811  | 43324887  | 37            | 0.019    | 1        | 1         | 1.735E-04  | 1.598E-03 | PEB-GT     |
| NUTM1          | NUT midline carcinoma, family member 1 [Source:HGNC Symbol;Acc:29919]                                           | chr15 | 34835516  | 34849938  | 54            | 0.019    | 1        | 1         | 1.741E-04  | 1.598E-03 | PEB-GT     |
| ARF1           | ADP-ribosylation factor 1 [Source:HGNC Symbol;Acc:652]                                                          | chr1  | 228270361 | 228286912 | 53            | 0.019    | 1        | 1         | 1.748E-04  | 1.598E-03 | PEB-GT     |
| RAB1F          | RAB interacting factor [Source:HGNC Symbol;Acc:9797]                                                            | chr1  | 102284085 | 102284085 | 53            | 0.019    | 1        | 1         | 1.748E-04  | 1.598E-03 | PEB-GT     |
| SNRPE          | small nuclear ribonucleoprotein polypeptide E [Source:HGNC Symbol;Acc:11611]                                    | chr1  | 203830731 | 203839678 | 53            | 0.019    | 1        | 1         | 1.748E-04  | 1.598E-03 | PEB-GT     |
| TRAPP3         | trafficking protein particle complex 3 [Source:HGNC Symbol;Acc:19942]                                           | chr1  | 36602173  | 36615988  | 53            | 0.019    | 1        | 1         | 1.748E-04  | 1.598E-03 | PEB-GT     |
| EIF2AK2        | eukaryotic translation initiation factor 2-alpha kinase 2 [Source:HGNC Symbol;Acc:9437]                         | chr2  | 37236353  | 37384208  | 365           | 0.104    | 2        | 4         | 1.753E-04  | 1.598E-03 | PEB-GT     |
| ZNF93          | ZNF93 [Source:HGNC Symbol;Acc:19129]                                                                            | chr12 | 29276591  | 29276591  | 1007          | 0.107    | 2        | 2         | 1.771E-04  | 1.611E-03 | PEB-GT     |
| ALG5           | ALG5, dolichyl phosphate beta-glucosyltransferase [Source:HGNC Symbol;Acc:20266]                                | chr13 | 37523912  | 37574398  | 42            | 0.105    | 2        | 2         | 1.778E-04  | 1.611E-03 | PEB-GT     |
| DHDODH         | dihydroorotate dehydrogenase (quinone) [Source:HGNC Symbol;Acc:2867]                                            | chr16 | 72042487  | 72058954  | 57            | 0.019    | 1        | 1         | 1.800E-04  | 1.622E-03 | PEB-GT     |
| ARPC5L         | arctin related protein 2/3 complex, subunit 5-like [Source:HGNC Symbol;Acc:23366]                               | chr9  | 127624409 | 127640003 | 51            | 0.019    | 1        | 1         | 1.807E-04  | 1.622E-03 | PEB-GT     |
| GRPEL2         | Grp-like 2, mitochondrial (E. coli) [Source:HGNC Symbol;Acc:21960]                                              | chr1  | 148734146 | 148734146 | 66            | 0.019    | 1        | 1         | 1.807E-04  | 1.622E-03 | PEB-GT     |
| SDBC2P         | sending binding protein (syntenin) 2 [Source:HGNC Symbol;Acc:15756]                                             | chr20 | 1290619   | 1309883   | 53            | 0.019    | 1        | 1         | 1.821E-04  | 1.626E-03 | PEB-GT     |
| DDX39B         | DEAD (Asp-Glu-Ala-Asp) box polypeptide 39B [Source:HGNC Symbol;Acc:13917]                                       | chr6  | 31497996  | 31510225  | 56            | 0.019    | 1        | 1         | 1.827E-04  | 1.626E-03 | PEB-GT     |
| TXNDC17        | thioredoxin domain containing 17 [Source:HGNC Symbol;Acc:28218]                                                 | chr17 | 6544078   | 6547961   | 38            | 0.019    | 1        | 1         | 1.829E-04  | 1.626E-03 | PEB-GT     |
| SCAND2P        | scandalain domain containing 2 pseudogene [Source:HGNC Symbol;Acc:10567]                                        | chr1  | 10516789  | 10516789  | 56            | 0.020    | 1        | 1         | 1.832E-04  | 1.626E-03 | PEB-GT     |
| DFFA           | DNA fragmentation factor, 45kDa, alpha polypeptide [Source:HGNC Symbol;Acc:2772]                                | chr1  | 10516579  | 10525283  | 55            | 0.020    | 1        | 1         | 1.881E-04  | 1.662E-03 | PEB-GT     |
| EEF1A1         | eukaryotic translation elongation factor 1 alpha 1 [Source:HGNC Symbol;Acc:3189]                                | chr6  | 74225473  | 74233250  | 57            | 0.020    | 1        | 1         | 1.892E-04  | 1.667E-03 | PEB-GT     |
| RPL17-C18orf32 | RPL17-C18orf32 readthrough [Source:HGNC Symbol;Acc:44661]                                                       | chr18 | 47020851  | 47016986  | 82            | 0.020    | 1        | 1         | 1.903E-04  | 1.671E-03 | PEB-GT     |
| CHAMP1         | chromatin alignment maintaining phosphoprotein 1 [Source:HGNC Symbol;Acc:20311]                                 | chr17 | 115078786 | 115078786 | 61            | 0.020    | 1        | 1         | 1.917E-04  | 1.671E-03 | PEB-GT     |
| SRSF1          | serine/arginine-rich splicing factor 1 [Source:HGNC Symbol;Acc:10780]                                           | chr17 | 56080854  | 56084707  | 39            | 0.020    | 1        | 1         | 1.926E-04  | 1.677E-03 | PEB-GT     |
| ARL2BP         | ADP-ribosylation factor-like 2 binding protein [Source:HGNC Symbol;Acc:17146]                                   | chr16 | 57279010  | 57287516  | 59            | 0.020    | 1        | 1         | 1.928E-04  | 1.677E-03 | PEB-GT     |
| RASAL2         | RAS protein activator like 2 [Source:HGNC Symbol;Acc:3974]                                                      | chr1  | 178062664 | 178448644 | 3248          | 1.153    | 6        | 2         | 1.977E-04  | 1.715E-03 | PEB-GT     |
| SRRM2          | serine/arginine repetitive matrix 2 [Source:HGNC Symbol;Acc:16639]                                              | chr16 | 29023316  | 29023316  | 69            | 0.020    | 1        | 1         | 1.974E-04  | 1.715E-03 | PEB-GT     |
| PRDX1          | peroxiredoxin 1 [Source:HGNC Symbol;Acc:3552]                                                                   | chr1  | 45987678  | 45988719  | 57            | 0.020    | 1        | 1         | 1.202E-04  | 1.735E-03 | PEB-GT     |
| PINK1          | PTEN induced putative kinase 1 [Source:HGNC Symbol;Acc:14581]                                                   | chr1  | 20959948  | 20978004  | 57            | 0.020    | 1        | 1         | 1.202E-04  | 1.735E-03 | PEB-GT     |
| BCORP1         | BCL6 corepressor pseudogene 1 [Source:HGNC Symbol;Acc:23953]                                                    | chrY  | 21617317  | 21665039  | 301           | 0.020    | 1        | 1         | 1.202E-04  | 1.735E-03 | PEB-GT     |
| KIAA1430       | KIAA1430 [Source:HGNC Symbol;Acc:29278]                                                                         | chr1  | 18638009  | 18638009  | 390           | 0.111    | 2        | 2         | 1.202E-04  | 1.735E-03 | PEB-GT     |
| SCAF11         | SR-related CTD-associated factor 11 [Source:HGNC Symbol;Acc:10784]                                              | chr12 | 46312814  | 46389903  | 735           | 0.281    | 3        | 3         | 1.208E-04  | 1.768E-03 | PEB-GT     |
| GSK3A          | glycogen synthase kinase 3 alpha [Source:HGNC Symbol;Acc:4616]                                                  | chr19 | 42734338  | 42748777  | 39            | 0.021    | 1        | 1         | 1.208E-04  | 1.768E-03 | PEB-GT     |
| HFE            | hemochromatosis [Source:HGNC Symbol;Acc:4886]                                                                   | chr6  | 26087509  | 26098871  | 60            | 0.021    | 1        | 1         | 1.209E-04  | 1.768E-03 | PEB-GT     |
| MEI2D          | mediator complex subunit 2D [Source:HGNC Symbol;Acc:16840]                                                      | chr17 | 41873092  | 41873092  | 69            | 0.021    | 1        | 1         | 1.209E-04  | 1.768E-03 | PEB-GT     |
| TNRC18         | truncosin-like repeat containing 18 [Source:HGNC Symbol;Acc:11962]                                              | chr7  | 5346421   | 5460545   | 299           | 0.111    | 2        | 2         | 1.209E-04  | 1.768E-03 | PEB-GT     |
| FN3K           | fructosamine 3 kinase [Source:HGNC Symbol;Acc:24822]                                                            | chr17 | 80693451  | 80709073  | 41            | 0.021    | 1        | 1         | 1.212E-04  | 1.786E-03 | PEB-GT     |
| SELRC1         | Sel1 protein containing 1 [Source:HGNC Symbol;Acc:58716]                                                        | chr1  | 53125208  | 53164038  | 59            | 0.021    | 1        | 1         | 1.213E-04  | 1.811E-03 | PEB-GT     |
| SY51           | Synthetic lethal 51 [Source:HGNC Symbol;Acc:16162]                                                              | chr1  | 43989577  | 44026438  | 62            | 0.022    | 1        | 1         | 1.213E-04  | 1.811E-03 | PEB-GT     |
| PLCE1-AS1      | PLCE1 antisense RNA 1 [Source:HGNC Symbol;Acc:45193]                                                            | chr10 | 96039034  | 96046828  | 59            | 0.021    | 1        | 1         | 1.218E-04  | 1.812E-03 | PEB-GT     |
| WDB1           | WD repeat, sterile alpha motif and U-box domain containing 1 [Source:HGNC Symbol;Acc:26697]                     | chr10 | 160092304 | 16013310  | 394           | 0.113    | 2        | 2         | 1.219E-04  | 1.812E-03 | PEB-GT     |
| GABARAPL2      | GABA(A) receptor-associated protein-like 2 [Source:HGNC Symbol;Acc:13291]                                       | chr16 | 75900249  | 75911779  | 63            | 0.021    | 1        | 1         | 1.219E-04  | 1.812E-03 | PEB-GT     |
| E2F7           | E2F7 [Source:HGNC Symbol;Acc:23920]                                                                             | chr16 | 77415027  | 77459680  | 293           | 0.111    | 2        | 2         | 1.2207E-04 | 1.812E-03 | PEB-GT     |
| FIGNL1         | figitin-like 1 [Source:HGNC Symbol;Acc:13286]                                                                   | chr7  | 50511831  | 50518088  | 57            | 0.021    | 1        | 1         | 1.2209E-04 | 1.812E-03 | PEB-GT     |
| MNX1           | motor neuron and pancreas homeobox 1 [Source:HGNC Symbol;Acc:4979]                                              | chr7  | 156786745 | 156803345 | 57            | 0.021    | 1        | 1         | 1.2209E-04 | 1.812E-03 | PEB-GT     |
| ZNF217         | zinc finger protein 217 [Source:HGNC Symbol;Acc:13009]                                                          | chr20 | 51293604  | 51226446  | 313           | 0.113    | 2        | 2         | 1.229E-04  | 1.827E-03 | PEB-GT     |
| TMEI45         | transketolase domain containing 45 [Source:HGNC Symbol;Acc:863]                                                 | chr12 | 111774832 | 111882225 | 76            | 0.022    | 1        | 1         | 1.243E-04  | 1.843E-03 | PEB-GT     |
| NBR1           | neighbor of BRCA1 gene 1 [Source:HGNC Symbol;Acc:6746]                                                          | chr17 | 41322498  | 41363708  | 225           | 0.114    | 2        | 2         | 1.266E-04  | 1.843E-03 | PEB-GT     |
| DNAJB12        | DnaJ (Hsp40) homolog, subfamily B, member 12 [Source:HGNC Symbol;Acc:14891]                                     | chr10 | 74092588  | 74114988  | 61            | 0.022    | 1        | 1         | 1.236E-04  | 1.890E-03 | PEB-GT     |
| ZNF200         | zinc finger protein 200 [Source:HGNC Symbol;Acc:12939]                                                          | chr16 | 3273225   | 3286221   | 65            | 0.022    | 1        | 1         | 1.236E-04  | 1.890E    |            |

**table S2. Genes with significant transposon integrations in RKO BRAF<sup>WT</sup> cells after selection in low glucose medium**

| Gene ID  | Description                                                                                                                 | Chrom | Start     | End       | # TTAAs sites | Expected | Observed | Libraries | P         | FDR       | Transposon |
|----------|-----------------------------------------------------------------------------------------------------------------------------|-------|-----------|-----------|---------------|----------|----------|-----------|-----------|-----------|------------|
| ANKRD46  | ankyrin repeat domain 46 [Source:HGNC Symbol;Acc:27229]                                                                     | chr8  | 101621980 | 101572012 | 388           | 0.133    | 2        | 1         | 3.544E-04 | 2.445E-03 | PB-GT      |
| FAM1174B | family with sequence similarity 174, member B [Source:HGNC Symbol;Acc:34339]                                                | chr15 | 93150773  | 93255314  | 932           | 0.324    | 3        | 2         | 3.453E-04 | 2.445E-03 | PB-GT      |
| SUP1P3   | suppressor of G2 allele of SKP1 (S. cerevisiae) pseudogene 3 [Source:HGNC Symbol;Acc:20513]                                 | chr13 | 41482295  | 41495910  | 111           | 0.027    | 1        | 1         | 3.567E-04 | 2.445E-03 | PB-GT      |
| PPP2R4   | protein phosphatase 2A activator, regulatory subunit 4 [Source:HGNC Symbol;Acc:9308]                                        | chr9  | 131873229 | 131911225 | 72            | 0.027    | 1        | 1         | 3.582E-04 | 2.453E-03 | PB-GT      |
| DPF2     | D4, zinc and double PH2 fingers family 2 [Source:HGNC Symbol;Acc:9964]                                                      | chr11 | 65101225  | 65120720  | 78            | 0.027    | 1        | 1         | 3.597E-04 | 2.458E-03 | PB-GT      |
| MYL12B   | myosin, light chain 12B, regulatory [Source:HGNC Symbol;Acc:29827]                                                          | chr7  | 3261907   | 3276282   | 114           | 0.027    | 1        | 1         | 3.606E-04 | 2.465E-03 | PB-GT      |
| TRIP4    | thyroid hormone receptor interacting 4 [Source:HGNC Symbol;Acc:12310]                                                       | chr15 | 64679947  | 64747502  | 387           | 0.135    | 2        | 1         | 3.674E-04 | 2.485E-03 | PB-GT      |
| COA1     | cytochrome c oxidase assembly factor 1 homolog (S. cerevisiae) [Source:HGNC Symbol;Acc:21868]                               | chr7  | 43648055  | 43769316  | 881           | 0.327    | 3        | 1         | 3.679E-04 | 2.485E-03 | PB-GT      |
| PRDM14   | PR domain containing 14 [Source:HGNC Symbol;Acc:14001]                                                                      | chr8  | 70963886  | 70983928  | 80            | 0.027    | 1        | 1         | 3.688E-04 | 2.485E-03 | PB-GT      |
| TMEM126A | transmembrane protein 126A [Source:HGNC Symbol;Acc:25382]                                                                   | chr16 | 151832010 | 152133090 | 2464          | 0.915    | 5        | 2         | 3.745E-04 | 2.505E-03 | PB-GT      |
| DHCR7    | 7-dehydrocholesterol reductase [Source:HGNC Symbol;Acc:2860]                                                                | chr11 | 71139239  | 71163914  | 79            | 0.027    | 1        | 1         | 3.689E-04 | 2.485E-03 | PB-GT      |
| ZEB2     | zinc finger E-box binding homeobox 2 [Source:HGNC Symbol;Acc:14881]                                                         | chr2  | 145145568 | 145282147 | 1147          | 0.328    | 3        | 2         | 3.715E-04 | 2.497E-03 | PB-GT      |
| ALG10    | ALG10, alpha-1,2-glucosyltransferase [Source:HGNC Symbol;Acc:23162]                                                         | chr12 | 34175216  | 34282629  | 72            | 0.028    | 1        | 1         | 3.730E-04 | 2.501E-03 | PB-GT      |
| MLL3     | myeloid/lymphoid or mixed-lineage leukemia 3 [Source:HGNC Symbol;Acc:13726]                                                 | chr1  | 109289176 | 109339491 | 445           | 0.137    | 2        | 2         | 3.800E-04 | 2.534E-03 | PB-GT      |
| C14orf93 | chromosome 14 open reading frame 93 [Source:HGNC Symbol;Acc:20162]                                                          | chr14 | 23456110  | 23479375  | 102           | 0.028    | 1        | 1         | 3.756E-04 | 2.507E-03 | PB-GT      |
| WDR83    | WD repeat domain 63 [Source:HGNC Symbol;Acc:30711]                                                                          | chr1  | 85464830  | 85598821  | 928           | 0.329    | 3        | 2         | 3.776E-04 | 2.507E-03 | PB-GT      |
| HAUS1    | HAUS augmin-like complex, subunit 1 [Source:HGNC Symbol;Acc:25174]                                                          | chr18 | 43684298  | 43708299  | 116           | 0.028    | 1        | 1         | 3.789E-04 | 2.507E-03 | PB-GT      |
| RAFEP2   | ras-binding protein GTPase binding factor protein 2 [Source:HGNC Symbol;Acc:24817]                                          | chr16 | 28915742  | 28947947  | 83            | 0.028    | 1        | 1         | 3.794E-04 | 2.507E-03 | PB-GT      |
| ZFPM1    | zinc finger protein, FOG family member 1 [Source:HGNC Symbol;Acc:19782]                                                     | chr16 | 88519725  | 88601572  | 83            | 0.028    | 1        | 1         | 3.794E-04 | 2.507E-03 | PB-GT      |
| SRSF3    | serine/arginine-rich splicing factor 3 [Source:HGNC Symbol;Acc:10785]                                                       | chr6  | 36562145  | 36571209  | 81            | 0.028    | 1        | 1         | 3.800E-04 | 2.507E-03 | PB-GT      |
| OPA1-AS1 | OPA1 antisense RNA 1 [Source:HGNC Symbol;Acc:40421]                                                                         | chr3  | 19336398  | 19334126  | 91            | 0.028    | 1        | 1         | 3.848E-04 | 2.531E-03 | PB-GT      |
| KIAA1524 | KIAA1524 [Source:HGNC Symbol;Acc:29302]                                                                                     | chr5  | 109289176 | 109339491 | 445           | 0.137    | 2        | 2         | 3.800E-04 | 2.534E-03 | PB-GT      |
| FAM21C   | family with sequence similarity 21, member C [Source:HGNC Symbol;Acc:23414]                                                 | chr10 | 46222848  | 46228499  | 384           | 0.137    | 2        | 1         | 3.872E-04 | 2.537E-03 | PB-GT      |
| SMIM21   | small integral membrane protein 21 [Source:HGNC Symbol;Acc:27598]                                                           | chr18 | 73121431  | 73139658  | 119           | 0.029    | 1        | 1         | 3.985E-04 | 2.601E-03 | PB-GT      |
| OSTCP1   | oligosaccharyltransferase complex subunit pseudogene 1 [Source:HGNC Symbol;Acc:30530]                                       | chr6  | 159262149 | 159278664 | 83            | 0.029    | 1        | 1         | 3.988E-04 | 2.601E-03 | PB-GT      |
| PFKFB2   | 6-phosphofructo-2-kinase/fructose 2,6-bisphosphatase 4 [Source:HGNC Symbol;Acc:8875]                                        | chr5  | 48555117  | 48559173  | 85            | 0.029    | 1        | 1         | 3.989E-04 | 2.601E-03 | PB-GT      |
| CD99P1   | CD99 molecule pseudogene 1 [Source:HGNC Symbol;Acc:7083]                                                                    | chrX  | 2527389   | 2527520   | 172           | 0.029    | 1        | 1         | 4.029E-04 | 2.610E-03 | PB-GT      |
| PRDX4    | peroxiredoxin 4 [Source:HGNC Symbol;Acc:17169]                                                                              | chrX  | 23682379  | 23704516  | 172           | 0.029    | 1        | 1         | 4.029E-04 | 2.610E-03 | PB-GT      |
| HSPA9    | heat shock 70kDa protein 9 (mortalin) [Source:HGNC Symbol;Acc:5244]                                                         | chr5  | 137890571 | 13791133  | 107           | 0.029    | 1        | 1         | 4.079E-04 | 2.636E-03 | PB-GT      |
| MLT6     | myeloid/lymphoid or mixed-lineage leukemia (bifurcous homolog, Drosophila), translocated to, 6 [Source:HGNC Symbol;Acc:713] | chr17 | 36861795  | 36886056  | 82            | 0.029    | 1        | 1         | 4.089E-04 | 2.637E-03 | PB-GT      |
| BRWD1    | brachyridin and WD repeat domain containing 1 [Source:HGNC Symbol;Acc:15760]                                                | chr12 | 40984902  | 40989485  | 1180          | 0.329    | 4        | 1         | 4.098E-04 | 2.637E-03 | PB-GT      |
| CNOT6    | CCR4-NOT transcription complex, subunit 6 [Source:HGNC Symbol;Acc:14099]                                                    | chr5  | 192921412 | 180005405 | 521           | 0.140    | 2        | 1         | 4.154E-04 | 2.656E-03 | PB-GT      |
| KLHL21   | kelch-like family member 21 [Source:HGNC Symbol;Acc:29041]                                                                  | chr1  | 6650784   | 6674667   | 82            | 0.029    | 1        | 1         | 4.155E-04 | 2.656E-03 | PB-GT      |
| PPP1R15B | protein phosphatase 1, regulatory subunit 15B [Source:HGNC Symbol;Acc:14851]                                                | chr1  | 204372515 | 204380919 | 82            | 0.029    | 1        | 1         | 4.155E-04 | 2.656E-03 | PB-GT      |
| TCEACN   | transcription elongation factor A (SII) N-terminal and central domain containing [Source:HGNC Symbol;Acc:28277]             | chr7  | 13971225  | 13700093  | 75            | 0.029    | 1        | 1         | 4.159E-04 | 2.659E-03 | PB-GT      |
| INSIG1   | insulin induced gene 1 [Source:HGNC Symbol;Acc:6083]                                                                        | chr7  | 155098486 | 155101945 | 79            | 0.029    | 1        | 1         | 4.220E-04 | 2.679E-03 | PB-GT      |
| LATS1    | large tumor suppressor kinase 1 [Source:HGNC Symbol;Acc:6514]                                                               | chr6  | 149979289 | 15003932  | 411           | 0.141    | 2        | 1         | 4.220E-04 | 2.679E-03 | PB-GT      |
| H3F3C    | H3 histone, family 3H (H3.3B) [Source:HGNC Symbol;Acc:4765]                                                                 | chr17 | 73772515  | 73781974  | 58            | 0.029    | 1        | 1         | 4.232E-04 | 2.681E-03 | PB-GT      |
| SLC17A5  | solute carrier family 17 (cationic transporter), member 5 [Source:HGNC Symbol;Acc:10933]                                    | chr12 | 74331012  | 74331012  | 412           | 0.141    | 2        | 1         | 4.282E-04 | 2.708E-03 | PB-GT      |
| HJURP    | Holliday junction recognition protein [Source:HGNC Symbol;Acc:25444]                                                        | chr2  | 234742062 | 234763212 | 103           | 0.029    | 1        | 1         | 4.254E-04 | 2.682E-03 | PB-GT      |
| SF1      | splicing factor 1 [Source:HGNC Symbol;Acc:12950]                                                                            | chr11 | 64532078  | 64546258  | 85            | 0.029    | 1        | 1         | 4.265E-04 | 2.684E-03 | PB-GT      |
| SFRF2    | small EDRK-rich factor 2 [Source:HGNC Symbol;Acc:10757]                                                                     | chr15 | 14069285  | 14069787  | 85            | 0.030    | 1        | 1         | 4.265E-04 | 2.690E-03 | PB-GT      |
| FAM115A  | family with sequence similarity 115, member A [Source:HGNC Symbol;Acc:22201]                                                | chr16 | 143584968 | 143599291 | 365           | 0.142    | 2        | 1         | 4.311E-04 | 2.701E-03 | PB-GT      |
| TET2     | tet methylcytosine dioxygenase 2 [Source:HGNC Symbol;Acc:25941]                                                             | chr7  | 106067032 | 106200973 | 1207          | 0.342    | 3        | 2         | 4.330E-04 | 2.707E-03 | PB-GT      |
| ZNF143   | zinc finger protein 143 [Source:HGNC Symbol;Acc:12928]                                                                      | chr11 | 9481866   | 9500071   | 411           | 0.143    | 2        | 1         | 4.346E-04 | 2.711E-03 | PB-GT      |
| C11orf1  | component 1, subcomponent-like [Source:HGNC Symbol;Acc:21265]                                                               | chr12 | 7242163   | 7261869   | 78            | 0.030    | 1        | 1         | 4.371E-04 | 2.717E-03 | PB-GT      |
| DEF8     | defect 8 expressed in FDCI2 B cell clone (mouse) [Source:HGNC Symbol;Acc:2760]                                              | chr6  | 92285548  | 92285548  | 87            | 0.030    | 1        | 1         | 4.378E-04 | 2.717E-03 | PB-GT      |
| MFAP1    | microfibrillar-associated protein 1 [Source:HGNC Symbol;Acc:7032]                                                           | chr15 | 44096960  | 44117000  | 86            | 0.030    | 1        | 1         | 4.384E-04 | 2.717E-03 | PB-GT      |
| ZNF182   | zinc finger protein 182 [Source:HGNC Symbol;Acc:13001]                                                                      | chrX  | 47834250  | 47863377  | 180           | 0.030    | 1        | 1         | 4.440E-04 | 2.724E-03 | PB-GT      |
| AGA      | aspartylglucosaminidase [Source:HGNC Symbol;Acc:316]                                                                        | chr1  | 178551924 | 178536557 | 106           | 0.030    | 1        | 1         | 4.442E-04 | 2.724E-03 | PB-GT      |
| FBXL12   | F-box and leucine-rich repeat protein 12 [Source:HGNC Symbol;Acc:13611]                                                     | chr18 | 92329649  | 92339649  | 87            | 0.030    | 1        | 1         | 4.394E-04 | 2.730E-03 | PB-GT      |
| RPL5     | ribosomal protein L5 [Source:HGNC Symbol;Acc:10360]                                                                         | chr1  | 93297582  | 93307481  | 85            | 0.030    | 1        | 1         | 4.462E-04 | 2.732E-03 | PB-GT      |
| PRPF4B   | PRP4 pre-mRNA processing factor 4 homolog B (yeast) [Source:HGNC Symbol;Acc:17346]                                          | chr6  | 4021501   | 4065217   | 419           | 0.144    | 2        | 1         | 4.462E-04 | 2.732E-03 | PB-GT      |
| TBRG1    | transforming growth factor beta regulator 1 [Source:HGNC Symbol;Acc:29551]                                                  | chr11 | 124492732 | 124505287 | 87            | 0.030    | 1        | 1         | 4.469E-04 | 2.732E-03 | PB-GT      |
| LC17S    | leucine carboxyl terminal 17CP1, subunit 5 (epitope) [Source:HGNC Symbol;Acc:1618]                                          | chr12 | 10250033  | 10250033  | 413           | 0.144    | 2        | 1         | 4.544E-04 | 2.772E-03 | PB-GT      |
| APT1S    | adaptor-related protein cell 1, sigma 3 subunit [Source:HGNC Symbol;Acc:18971]                                              | chr2  | 224616403 | 224702444 | 507           | 0.145    | 2        | 1         | 4.558E-04 | 2.777E-03 | PB-GT      |
| MIR3654  | microRNA 3654 [Source:HGNC Symbol;Acc:38866]                                                                                | chr11 | 62327075  | 62359003  | 88            | 0.031    | 1        | 1         | 4.568E-04 | 2.777E-03 | PB-GT      |
| BRD3     | bromodomain containing 3 [Source:HGNC Symbol;Acc:1104]                                                                      | chr9  | 136899427 | 136933657 | 82            | 0.031    | 1        | 1         | 4.584E-04 | 2.800E-03 | PB-GT      |
| CD21     | CD21, interacting zinc finger protein 1 [Source:HGNC Symbol;Acc:16744]                                                      | chr12 | 139928243 | 139928243 | 102           | 0.031    | 1        | 1         | 4.600E-04 | 2.803E-03 | PB-GT      |
| UMPS     | uridine monophosphate synthetase [Source:HGNC Symbol;Acc:12563]                                                             | chr3  | 124492213 | 124440400 | 100           | 0.031    | 1        | 1         | 4.636E-04 | 2.800E-03 | PB-GT      |
| SLC3A2   | solute carrier family 3 (activators of dibasic and neutral amino acid transport), member 2 [Source:HGNC Symbol;Acc:11026]   | chr11 | 62623518  | 62656352  | 89            | 0.031    | 1        | 1         | 4.672E-04 | 2.810E-03 | PB-GT      |
| HSPA13   | heat shock protein 70kDa family, member 13 [Source:HGNC Symbol;Acc:11375]                                                   | chr21 | 15744336  | 15759805  | 108           | 0.031    | 1        | 1         | 4.677E-04 | 2.810E-03 | PB-GT      |
| ZFYVE16  | ZFYVE domain containing 16 [Source:HGNC Symbol;Acc:20756]                                                                   | chr12 | 79738332  | 79738332  | 142           | 0.031    | 1        | 1         | 4.678E-04 | 2.810E-03 | PB-GT      |
| CD97     | CD97 molecule [Source:HGNC Symbol;Acc:1711]                                                                                 | chr19 | 14519313  | 14519313  | 59            | 0.031    | 1        | 1         | 4.747E-04 | 2.837E-03 | PB-GT      |
| HSD17B14 | hydroxysteroid (17-beta) dehydrogenase 14 [Source:HGNC Symbol;Acc:23338]                                                    | chr19 | 49316274  | 49339935  | 59            | 0.031    | 1        | 1         | 4.747E-04 | 2.837E-03 | PB-GT      |
| ABL1     | c-abl oncogene 1, non-receptor tyrosine kinase [Source:HGNC Symbol;Acc:76]                                                  | chr9  | 133589533 | 133763092 | 97            | 0.351    | 3        | 1         | 4.801E-04 | 2.861E-03 | PB-GT      |
| TAC3     | tachykinin 3 [Source:HGNC Symbol;Acc:1521]                                                                                  | chr12 | 67403784  | 67403784  | 82            | 0.031    | 1        | 1         | 4.824E-04 | 2.872E-03 | PB-GT      |
| TNS4     | tensin 4 [Source:HGNC Symbol;Acc:24352]                                                                                     | chr17 | 38632080  | 38657849  | 62            | 0.031    | 1        | 1         | 4.830E-04 | 2.861E-03 | PB-GT      |
| SPATA4   | spermatogenesis associated 4 [Source:HGNC Symbol;Acc:17333]                                                                 | chr4  | 177105789 | 177116822 | 111           | 0.031    | 1        | 1         | 4.836E-04 | 2.861E-03 | PB-GT      |
| FBOXO    | F-box protein 9 [Source:HGNC Symbol;Acc:13588]                                                                              | chr6  | 52916789  | 52926571  | 431           | 0.148    | 2        | 2         | 4.842E-04 | 2.861E-03 | PB-GT      |
| DLST     | delta-like 1, cytosolic (E2 catalytic component of 2-oxo-glutarate complex) [Source:HGNC Symbol;Acc:2911]                   | chr6  | 75348549  | 75348549  | 116           | 0.031    | 1        | 1         | 4.848E-04 | 2.861E-03 | PB-GT      |
| GATAD1   | GATA zinc finger domain containing 1 [Source:HGNC Symbol;Acc:29941]                                                         | chr7  | 92076767  | 92088150  | 85            | 0.032    | 1        | 1         | 4.878E-04 | 2.872E-03 | PB-GT      |
| SMAD7    | SMAD family member 7 [Source:HGNC Symbol;Acc:6773]                                                                          | chr18 | 48462223  | 484677081 | 132           | 0.032    | 1        | 1         | 4.893E-04 | 2.872E-03 | PB-GT      |
| ZNF770   | zinc finger protein 770 [Source:HGNC Symbol;Acc:26061]                                                                      | chr15 | 35270542  | 352708488 | 91            | 0.032    | 1        | 1         | 4.903E-04 | 2.872E-03 | PB-GT      |
| TXNRD1   | thioredoxin reductase 1 [Source:HGNC Symbol;Acc:12437]                                                                      | chr1  | 104069557 | 104069557 | 923           | 0.353    | 3        | 1         | 4.903E-04 | 2.872E-03 | PB-GT      |
| BAG2     | BCL2-associated athanogene 2 [Source:HGNC Symbol;Acc:938]                                                                   | chr6  | 57037124  | 57049735  | 93            | 0.032    | 1        | 1         | 4.995E-04 | 2.919E-03 | PB-GT      |
| ETS2     | v-ets erythroblastosis virus E26 oncogene homolog 2 (avian) [Source:HGNC Symbol;Acc:3489]                                   | chr21 | 40177231  | 40196879  | 112           | 0.032    | 1        | 1         | 5.028E-04 | 2.923E-03 | PB-GT      |
| GNPDA1   | guanine-6-phosphate deaminase 1 [Source:HGNC Symbol;Acc:4417]                                                               | chr5  | 141371314 | 141392060 | 119           | 0.032    | 1        | 1         |           |           |            |

table S2. Genes with significant transposon integrations in RKO BRAF<sup>wt/wt</sup> cells after selection in low glucose medium

| Gene ID      | Description                                                                                           | Chrom | Start     | End       | # TTAAs sites | Expected | Observed | Libraries | P         | FDR       | Transposon |
|--------------|-------------------------------------------------------------------------------------------------------|-------|-----------|-----------|---------------|----------|----------|-----------|-----------|-----------|------------|
| EXOC5        | exocyst complex component 5 [Source:HGNC Symbol;Acc:10696]                                            | chr14 | 57870518  | 5735726   | 605           | 0.164    | 2        | 1         | 6.513E-04 | 3.371E-03 | PB-GT      |
| RPL22        | ribosomal protein L22 [Source:HGNC Symbol;Acc:10315]                                                  | chr1  | 9341229   | 6379495   | 103           | 0.037    | 1        | 1         | 6.524E-04 | 3.371E-03 | PB-GT      |
| ACAT2        | acetyl-CoA acetyltransferase 2 [Source:HGNC Symbol;Acc:34]                                            | chr6  | 160181360 | 160200144 | 107           | 0.037    | 1        | 1         | 6.591E-04 | 3.400E-03 | PB-GT      |
| COR07        | [Source:HGNC Symbol;Acc:21611]                                                                        | chr16 | 4405453   | 4475706   | 110           | 0.037    | 1        | 1         | 6.625E-04 | 3.406E-03 | PB-GT      |
| SRSF11       | serine/arginine-rich splicing factor 11 [Source:HGNC Symbol;Acc:10782]                                | chr1  | 70671365  | 70718735  | 465           | 0.165    | 2        | 2         | 6.627E-04 | 3.406E-03 | PB-GT      |
| GT13C2       | general transcription factor IIC1, polypeptide 2, core1 [Source:HGNC Symbol;Acc:4665]                 | chr2  | 27548716  | 27573969  | 129           | 0.037    | 1        | 1         | 6.639E-04 | 3.406E-03 | PB-GT      |
| NEK2         | NIMA-related kinase 2 [Source:HGNC Symbol;Acc:7745]                                                   | chr1  | 211836114 | 211848960 | 104           | 0.037    | 1        | 1         | 6.650E-04 | 3.406E-03 | PB-GT      |
| SS18L1       | synovial sarcoma translocation gene on chromosome 18-like 1 [Source:HGNC Symbol;Acc:15592]            | chr20 | 60718222  | 60757540  | 102           | 0.037    | 1        | 1         | 6.664E-04 | 3.407E-03 | PB-GT      |
| CND3D3       | cyclin D3 [Source:HGNC Symbol;Acc:1585]                                                               | chr6  | 41920271  | 42018095  | 484           | 0.166    | 2        | 2         | 6.765E-04 | 3.452E-03 | PB-GT      |
| MAD1L1       | MAD1 mitotic arrest deficient-like 1 (yeast) [Source:HGNC Symbol;Acc:6762]                            | chr7  | 1855429   | 2272878   | 1039          | 0.386    | 3        | 2         | 6.785E-04 | 3.461E-03 | PB-GT      |
| TNKS2-AS1    | TNKS2 antisense RNA 1 (head to head) [Source:HGNC Symbol;Acc:45173]                                   | chr10 | 93542596  | 93550048  | 105           | 0.037    | 1        | 1         | 6.848E-04 | 3.482E-03 | PB-GT      |
| VDAC1        | voltage-dependent anion channel 1 [Source:HGNC Symbol;Acc:12669]                                      | chr5  | 13307606  | 13340824  | 140           | 0.038    | 1        | 1         | 6.941E-04 | 3.523E-03 | PB-GT      |
| BMP2K        | BMP2 inducible kinase [Source:HGNC Symbol;Acc:18041]                                                  | chr4  | 79697496  | 7987526   | 1372          | 0.388    | 3        | 2         | 6.967E-04 | 3.531E-03 | PB-GT      |
| RAB7A        | RAB7A, member RAS oncogene family [Source:HGNC Symbol;Acc:9788]                                       | chr3  | 128444665 | 128533639 | 549           | 0.169    | 2        | 1         | 7.077E-04 | 3.580E-03 | PB-GT      |
| ZC3H6        | zinc finger CCHC-type containing 6 [Source:HGNC Symbol;Acc:24762]                                     | chr2  | 110303171 | 110309760 | 592           | 0.169    | 2        | 1         | 7.126E-04 | 3.594E-03 | PB-GT      |
| ZNF786       | zinc finger protein 786 [Source:HGNC Symbol;Acc:21806]                                                | chr7  | 148766735 | 148787874 | 103           | 0.038    | 1        | 1         | 7.131E-04 | 3.594E-03 | PB-GT      |
| SLC2A3       | solute carrier family 2 (facilitated glucose transporter), member 3 [Source:HGNC Symbol;Acc:11007]    | chr12 | 8071826   | 8088871   | 100           | 0.038    | 1        | 1         | 7.145E-04 | 3.595E-03 | PB-GT      |
| ANKRD30BL    | ankyrin repeat domain 30B-like [Source:HGNC Symbol;Acc:35167]                                         | chr12 | 13205164  | 13301526  | 594           | 0.170    | 2        | 1         | 7.186E-04 | 3.609E-03 | PB-GT      |
| DST          | dystonin [Source:HGNC Symbol;Acc:1090]                                                                | chr6  | 56322785  | 56819426  | 4181          | 1.046    | 6        | 2         | 7.213E-04 | 3.609E-03 | PB-GT      |
| MARCH6       | membrane-associated ring finger (C3HC4) 6, E3 ubiquitin protein ligase [Source:HGNC Symbol;Acc:30550] | chr5  | 10353815  | 10435491  | 631           | 0.170    | 2        | 1         | 7.218E-04 | 3.609E-03 | PB-GT      |
| TRIM25       | tripartite motif containing 25 [Source:HGNC Symbol;Acc:12932]                                         | chr17 | 54965270  | 54991399  | 76            | 0.038    | 1        | 1         | 7.223E-04 | 3.609E-03 | PB-GT      |
| PIA2         | pragmatically ring finger 2, E3 ubiquitin protein ligase [Source:HGNC Symbol;Acc:17481]               | chr5  | 106870410 | 10692425  | 632           | 0.170    | 2        | 1         | 7.251E-04 | 3.610E-03 | PB-GT      |
| COX10B       | cytochrome c10 homolog B (S. cerevisiae) [Source:HGNC Symbol;Acc:25819]                               | chr2  | 198318147 | 198340032 | 135           | 0.039    | 1        | 1         | 7.283E-04 | 3.610E-03 | PB-GT      |
| DUSP11       | dual specificity phosphatase 11 (RNA/RNP complex 1-interacting) [Source:HGNC Symbol;Acc:3066]         | chr12 | 73989311  | 74007284  | 135           | 0.039    | 1        | 1         | 7.263E-04 | 3.610E-03 | PB-GT      |
| NARS         | asparaginyl-tRNA synthetase [Source:HGNC Symbol;Acc:7643]                                             | chr18 | 56267888  | 56289445  | 162           | 0.039    | 1        | 1         | 7.335E-04 | 3.640E-03 | PB-GT      |
| CORO7-PAIM16 | CORO7-PAIM16 readthrough [Source:HGNC Symbol;Acc:44248]                                               | chr16 | 4390252   | 4392025   | 116           | 0.040    | 1        | 1         | 7.341E-04 | 3.640E-03 | PB-GT      |
| TBC1D8       | TBC1 domain family, member 8 (with GRAM domain) [Source:HGNC Symbol;Acc:17791]                        | chr2  | 101624079 | 101669328 | 1379          | 0.394    | 3        | 2         | 7.365E-04 | 3.641E-03 | PB-GT      |
| IQCB1        | IQ motif containing 1 [Source:HGNC Symbol;Acc:28949]                                                  | chr3  | 12488610  | 121553926 | 557           | 0.171    | 2        | 1         | 7.377E-04 | 3.641E-03 | PB-GT      |
| FBF1         | Fas (TNFRSF6) binding factor 1 [Source:HGNC Symbol;Acc:24674]                                         | chr17 | 73905655  | 73937221  | 77            | 0.039    | 1        | 1         | 7.412E-04 | 3.652E-03 | PB-GT      |
| NRAA2        | nuclear receptor subfamily 4, group A, member 2 [Source:HGNC Symbol;Acc:7081]                         | chr2  | 157180944 | 157198880 | 138           | 0.039    | 1        | 1         | 7.585E-04 | 3.731E-03 | PB-GT      |
| FAM3C        | FAM3C, member C, nuclease C [Source:HGNC Symbol;Acc:18664]                                            | chr1  | 120989106 | 121038418 | 467           | 0.173    | 2        | 1         | 7.639E-04 | 3.743E-03 | PB-GT      |
| SETD9        | SET domain containing 9 [Source:HGNC Symbol;Acc:28508]                                                | chr5  | 56205087  | 56221359  | 147           | 0.040    | 1        | 1         | 7.643E-04 | 3.747E-03 | PB-GT      |
| PCBP1-AS1    | PCBP1 antisense RNA 1 [Source:HGNC Symbol;Acc:42948]                                                  | chr2  | 70189395  | 70315978  | 607           | 0.174    | 2        | 1         | 7.668E-04 | 3.747E-03 | PB-GT      |
| ANLBP5       | ansatz-binding-like factor 6 interacting protein 5 [Source:HGNC Symbol;Acc:16937]                     | chr3  | 69134095  | 69149211  | 129           | 0.040    | 1        | 1         | 7.668E-04 | 3.747E-03 | PB-GT      |
| ETV2         | ets variant 3 [Source:HGNC Symbol;Acc:3492]                                                           | chr12 | 157008266 | 157108266 | 112           | 0.040    | 1        | 1         | 7.687E-04 | 3.754E-03 | PB-GT      |
| FBXO34       | F-box protein 34 [Source:HGNC Symbol;Acc:20201]                                                       | chr14 | 55738021  | 55828636  | 642           | 0.174    | 2        | 2         | 7.725E-04 | 3.761E-03 | PB-GT      |
| GPR75-AS3    | GPR75-AS3 readthrough [Source:HGNC Symbol;Acc:40043]                                                  | chr2  | 53759810  | 54087170  | 2440          | 0.698    | 4        | 2         | 7.745E-04 | 3.765E-03 | PB-GT      |
| CCDC174      | coiled-coil domain containing 174 [Source:HGNC Symbol;Acc:28033]                                      | chr3  | 14653271  | 14714166  | 130           | 0.040    | 1        | 1         | 7.766E-04 | 3.776E-03 | PB-GT      |
| ZKSCAN6      | zinc finger protein KRAB and SCAN domain 6 [Source:HGNC Symbol;Acc:12983]                             | chr1  | 28109716  | 28121047  | 117           | 0.040    | 1        | 1         | 7.801E-04 | 3.780E-03 | PB-GT      |
| LRP1         | low density lipoprotein receptor-related protein 1 [Source:HGNC Symbol;Acc:6662]                      | chr12 | 57522276  | 57607134  | 105           | 0.040    | 1        | 1         | 7.867E-04 | 3.801E-03 | PB-GT      |
| METAP1D      | methionyl aminopeptidase type 1D (mitochondrial) [Source:HGNC Symbol;Acc:32583]                       | chr2  | 172884940 | 172947158 | 613           | 0.175    | 2        | 2         | 7.877E-04 | 3.801E-03 | PB-GT      |
| RBM7         | RNA binding motif protein 7 [Source:HGNC Symbol;Acc:9904]                                             | chr11 | 114270752 | 114284925 | 116           | 0.040    | 1        | 1         | 7.887E-04 | 3.801E-03 | PB-GT      |
| NCL          | nucleolin [Source:HGNC Symbol;Acc:7467]                                                               | chr2  | 829318342 | 829318342 | 141           | 0.040    | 1        | 1         | 7.904E-04 | 3.801E-03 | PB-GT      |
| PRMT3        | protein arginine methyltransferase 3 [Source:HGNC Symbol;Acc:30163]                                   | chr11 | 20409076  | 20530840  | 1159          | 0.402    | 3        | 2         | 7.919E-04 | 3.802E-03 | PB-GT      |
| STMN1        | stathmin 1 [Source:HGNC Symbol;Acc:6510]                                                              | chr1  | 26210672  | 26233482  | 114           | 0.040    | 1        | 1         | 7.971E-04 | 3.824E-03 | PB-GT      |
| TRIO         | trio Rho guanine nucleotide exchange factor [Source:HGNC Symbol;Acc:12303]                            | chr5  | 14143811  | 14532235  | 2607          | 0.703    | 4        | 2         | 7.984E-04 | 3.822E-03 | PB-GT      |
| TMEM219      | transmembrane protein 219 [Source:HGNC Symbol;Acc:25011]                                              | chr1  | 298522206 | 29894373  | 121           | 0.041    | 1        | 1         | 7.989E-04 | 3.822E-03 | PB-GT      |
| RBM12B       | RNA binding motif protein 12B [Source:HGNC Symbol;Acc:32310]                                          | chr8  | 94741584  | 94753245  | 119           | 0.041    | 1        | 1         | 8.088E-04 | 3.859E-03 | PB-GT      |
| ATOX1        | ATX1 antioxidant protein 1 homolog (yeast) [Source:HGNC Symbol;Acc:708]                               | chr5  | 15118777  | 151152093 | 152           | 0.041    | 1        | 1         | 8.164E-04 | 3.889E-03 | PB-GT      |
| SPCS3        | signal peptide complex subunit 3 homolog (S. cerevisiae) [Source:HGNC Symbol;Acc:26212]               | chr4  | 17724115  | 177252336 | 145           | 0.041    | 1        | 1         | 8.200E-04 | 3.900E-03 | PB-GT      |
| SLC7A7       | solute carrier family 7, member 1 [Source:HGNC Symbol;Acc:25598]                                      | chr1  | 19398898  | 19492347  | 121           | 0.041    | 1        | 1         | 8.239E-04 | 3.903E-03 | PB-GT      |
| LETM2        | leucine zipper-EF-hand containing transmembrane protein 2 [Source:HGNC Symbol;Acc:14648]              | chr6  | 38243725  | 38267045  | 121           | 0.041    | 1        | 1         | 8.359E-04 | 3.955E-03 | PB-GT      |
| SYAP1        | synapse associated protein 1 [Source:HGNC Symbol;Acc:16273]                                           | chrX  | 16737755  | 16783459  | 249           | 0.041    | 1        | 1         | 8.371E-04 | 3.955E-03 | PB-GT      |
| SMI11        | small integral membrane protein 11 [Source:HGNC Symbol;Acc:1293]                                      | chr12 | 35747779  | 35780164  | 145           | 0.041    | 1        | 1         | 8.372E-04 | 3.955E-03 | PB-GT      |
| AMEN         | ameloblastin (enamel matrix protein) [Source:HGNC Symbol;Acc:452]                                     | chr2  | 71453793  | 71470374  | 147           | 0.041    | 1        | 1         | 8.374E-04 | 3.955E-03 | PB-GT      |
| PXN          | paxillin [Source:HGNC Symbol;Acc:9718]                                                                | chr12 | 120648250 | 120703574 | 109           | 0.042    | 1        | 1         | 8.489E-04 | 3.988E-03 | PB-GT      |
| IL20RB-AS1   | IL20RB antisense RNA 1 [Source:HGNC Symbol;Acc:40298]                                                 | chr3  | 136877967 | 136701038 | 136           | 0.042    | 1        | 1         | 8.511E-04 | 3.995E-03 | PB-GT      |
| ZNF156       | zinc finger protein 156 [Source:HGNC Symbol;Acc:28990]                                                | chr18 | 74069944  | 74207146  | 752           | 0.180    | 2        | 1         | 8.512E-04 | 3.995E-03 | PB-GT      |
| STAR07       | Star07 lipid transfer containing 7 [Source:HGNC Symbol;Acc:18063]                                     | chr2  | 96850597  | 96874933  | 147           | 0.042    | 1        | 1         | 8.514E-04 | 3.995E-03 | PB-GT      |
| PER2         | period circadian clock 2 [Source:HGNC Symbol;Acc:8846]                                                | chr2  | 239152679 | 239198743 | 147           | 0.042    | 1        | 1         | 8.592E-04 | 4.014E-03 | PB-GT      |
| NARF         | nuclear prelamin A recognition factor [Source:HGNC Symbol;Acc:29916]                                  | chr17 | 80416056  | 80446143  | 83            | 0.042    | 1        | 1         | 8.594E-04 | 4.014E-03 | PB-GT      |
| NDFIP2       | Nedd4 family interacting protein 2 [Source:HGNC Symbol;Acc:18537]                                     | chr13 | 80055287  | 80130210  | 748           | 0.182    | 2        | 1         | 8.717E-04 | 4.064E-03 | PB-GT      |
| ZER1         | zinc 1-related cell cycle regulator [Source:HGNC Symbol;Acc:30959]                                    | chr1  | 131492466 | 131513422 | 113           | 0.042    | 1        | 1         | 8.735E-04 | 4.064E-03 | PB-GT      |
| RTN3         | reticulon 3 [Source:HGNC Symbol;Acc:10468]                                                            | chr11 | 63484918  | 63527363  | 524           | 0.182    | 2        | 2         | 8.747E-04 | 4.064E-03 | PB-GT      |
| GPRC5A       | G protein-coupled receptor, family C, group 5, member A [Source:HGNC Symbol;Acc:9836]                 | chr12 | 13043716  | 13070871  | 111           | 0.042    | 1        | 1         | 8.778E-04 | 4.073E-03 | PB-GT      |
| KIF24        | kinases family member 24 [Source:HGNC Symbol;Acc:19916]                                               | chr9  | 34252379  | 34259198  | 486           | 0.182    | 2        | 1         | 8.812E-04 | 4.075E-03 | PB-GT      |
| UBE2B        | ubiquitin-conjugating enzyme E2B [Source:HGNC Symbol;Acc:12473]                                       | chr12 | 633706870 | 633727830 | 102           | 0.042    | 1        | 1         | 8.827E-04 | 4.075E-03 | PB-GT      |
| DUSP19       | dual specificity phosphatase 19 [Source:HGNC Symbol;Acc:18894]                                        | chr2  | 183943287 | 183964733 | 149           | 0.043    | 1        | 1         | 8.824E-04 | 4.075E-03 | PB-GT      |
| ZNF649       | zinc finger protein 649 [Source:HGNC Symbol;Acc:25741]                                                | chr19 | 52392477  | 52408293  | 81            | 0.043    | 1        | 1         | 8.878E-04 | 4.090E-03 | PB-GT      |
| KBTBD8       | ketch repeat and BTB (POZ) domain containing 8 [Source:HGNC Symbol;Acc:30691]                         | chr3  | 67048727  | 67061634  | 139           | 0.043    | 1        | 1         | 8.889E-04 | 4.090E-03 | PB-GT      |
| FKBP3        | FKBP3 protein 3, 28kDa [Source:HGNC Symbol;Acc:24903]                                                 | chr12 | 100967461 | 100974323 | 159           | 0.043    | 1        | 1         | 8.901E-04 | 4.090E-03 | PB-GT      |
| GSAL23       | growth arrest-specific 2 like 3 [Source:HGNC Symbol;Acc:27453]                                        | chr12 | 100967461 | 101022064 | 149           | 0.043    | 2        | 2         | 8.964E-04 | 4.107E-03 | PB-GT      |
| TMEM183A     | transmembrane protein 183A [Source:HGNC Symbol;Acc:20173]                                             | chr1  | 202976514 | 202993762 | 121           | 0.043    | 1        | 1         | 8.965E-04 | 4.107E-03 | PB-GT      |
| EGLN1        | egl nitric oxide homologue 1 (C. elegans) [Source:HGNC Symbol;Acc:1232]                               | chr1  | 23194997  | 231560790 | 517           | 0.184    | 2        | 1         | 8.984E-04 | 4.109E-03 | PB-GT      |
| SHPK         | serine/threonine kinase [Source:HGNC Symbol;Acc:1492]                                                 | chr6  | 3911558   | 3915696   | 85            | 0.043    | 1        | 1         | 9.007E-04 | 4.109E-03 | PB-GT      |
| RAG1         | recombination activating gene 1 [Source:HGNC Symbol;Acc:9831]                                         | chr11 | 36532259  | 36614706  | 531           | 0.184    | 2        | 1         | 9.086E-04 | 4.140E-03 | PB-GT      |
| SMG9         | smg-9 homolog, nonsense mediated mRNA decay factor (C. elegans) [Source:HGNC Symbol;Acc:25763]        | chr19 | 44235301  | 44259142  | 82            | 0.043    | 1        | 1         | 9.095E-04 | 4.140E-03 | PB-GT      |
| MED23        | mediator complex subunit 23 [Source:HGNC Symbol;Acc:2372]                                             | chr6  | 131895106 | 131949399 | 537           | 0.184    | 2        | 1         | 9.115E-04 | 4.142E-03 | PB-GT      |
| ARND3C       | arrestin domain containing 3 [Source:HGNC Symbol;Acc:29261]                                           | chr5  | 968265    |           |               |          |          |           |           |           |            |

**table S2. Genes with significant transposon integrations in RKO BRAF<sup>WT/WT</sup> cells after selection in low glucose medium**

| Gene ID    | Description                                                                                                 | Chrom | Start     | End       | # TAA sites | Expected | Observed | Libraries | P         | FDR       | Transposon |
|------------|-------------------------------------------------------------------------------------------------------------|-------|-----------|-----------|-------------|----------|----------|-----------|-----------|-----------|------------|
| FAM199X    | family with sequence similarity 199, X-linked [Source:HGNC Symbol;Acc:25195]                                | chrX  | 103411301 | 103440583 | 295         | 0.049    | 1        | 1         | 1.699E-03 | 4.838E-03 | PG-GT      |
| NACD23     | Nucleo domain containing 3 [Source:HGNC Symbol;Acc:22268]                                                   | chr7  | 44421969  | 44418499  | 542         | 0.201    | 2        | 1         | 1.896E-03 | 4.838E-03 | PG-GT      |
| MGME1      | mitochondrial genome maintenance exonuclease 1 [Source:HGNC Symbol;Acc:16205]                               | chr20 | 17349556  | 17971765  | 136         | 0.049    | 1        | 1         | 1.175E-03 | 4.854E-03 | PG-GT      |
| MIAT       | myocardial infarction associated transcript (non-protein coding) [Source:HGNC Symbol;Acc:33425]             | chr22 | 27042392  | 27072438  | 99          | 0.049    | 1        | 1         | 1.184E-03 | 4.883E-03 | PG-GT      |
| SLC38A2    | solute carrier family 38, member 2 [Source:HGNC Symbol;Acc:13448]                                           | chr12 | 46751972  | 46726850  | 130         | 0.050    | 1        | 1         | 1.198E-03 | 4.936E-03 | PG-GT      |
| CCDC69     | coiled-coil domain containing 69 [Source:HGNC Symbol;Acc:24487]                                             | chr5  | 150550613 | 150550706 | 185         | 0.051    | 1        | 1         | 1.202E-03 | 4.945E-03 | PG-GT      |
| SETD5      | SET domain containing 5 [Source:HGNC Symbol;Acc:25565]                                                      | chr3  | 9439299   | 9520024   | 661         | 0.203    | 2        | 1         | 1.204E-03 | 4.945E-03 | PG-GT      |
| MOB1A      | MOB kinase activator 1A [Source:HGNC Symbol;Acc:16015]                                                      | chr2  | 74382165  | 74406025  | 175         | 0.050    | 1        | 1         | 1.211E-03 | 4.968E-03 | PG-GT      |
| RWD04      | RWD domain containing 4 [Source:HGNC Symbol;Acc:23750]                                                      | chr4  | 184560788 | 184580378 | 177         | 0.050    | 1        | 1         | 1.215E-03 | 4.974E-03 | PG-GT      |
| NA60       | NA60 domain containing 1 [Source:HGNC Symbol;Acc:25875]                                                     | chr16 | 34923611  | 35369693  | 150         | 0.050    | 1        | 1         | 1.221E-03 | 5.002E-03 | PG-GT      |
| GSN        | gelsolin [Source:HGNC Symbol;Acc:4620]                                                                      | chr9  | 123970078 | 124096121 | 545         | 0.204    | 2        | 2         | 1.222E-03 | 4.992E-03 | PG-GT      |
| IKZF5      | IKAROS family zinc finger 5 (Pegasus) [Source:HGNC Symbol;Acc:14283]                                        | chr10 | 124750322 | 124768333 | 141         | 0.050    | 1        | 1         | 1.224E-03 | 4.994E-03 | PG-GT      |
| EGF        | epidermal growth factor [Source:HGNC Symbol;Acc:3229]                                                       | chr4  | 110634040 | 110933422 | 725         | 0.205    | 2        | 2         | 1.237E-03 | 5.037E-03 | PG-GT      |
| RBM14-RBM4 | RBM14-RBM4 readthrough [Source:HGNC Symbol;Acc:38840]                                                       | chr11 | 65304097  | 66113940  | 146         | 0.051    | 1        | 1         | 1.241E-03 | 5.046E-03 | PG-GT      |
| MYNN       | myoneurin [Source:HGNC Symbol;Acc:14955]                                                                    | chr3  | 169490619 | 169507504 | 165         | 0.051    | 1        | 1         | 1.245E-03 | 5.046E-03 | PG-GT      |
| UBE2E1     | ubiquitin-conjugating enzyme E2E 1 [Source:HGNC Symbol;Acc:12477]                                           | chr3  | 23847394  | 23932807  | 669         | 0.206    | 2        | 2         | 1.246E-03 | 5.046E-03 | PG-GT      |
| SPATL5L1   | spermatogenesis associated 5-like 1 [Source:HGNC Symbol;Acc:28762]                                          | chr15 | 45694529  | 45719817  | 146         | 0.051    | 1        | 1         | 1.248E-03 | 5.046E-03 | PG-GT      |
| ZFXH3      | zinc finger homeobox 3 [Source:HGNC Symbol;Acc:777]                                                         | chr16 | 72816784  | 73093597  | 1360        | 0.456    | 3        | 2         | 1.250E-03 | 5.056E-03 | PG-GT      |
| AAMDC      | adipogenesis associated, MH938 domain containing [Source:HGNC Symbol;Acc:30205]                             | chr11 | 77532155  | 77629478  | 596         | 0.207    | 2        | 1         | 1.263E-03 | 5.102E-03 | PG-GT      |
| TGDS       | TDP-glucose 4,6-dehydratase [Source:HGNC Symbol;Acc:20324]                                                  | chr13 | 95226308  | 95248511  | 211         | 0.051    | 1        | 1         | 1.268E-03 | 5.110E-03 | PG-GT      |
| ZNF775     | zinc finger protein 775 [Source:HGNC Symbol;Acc:26501]                                                      | chr7  | 150065879 | 150190588 | 138         | 0.051    | 1        | 1         | 1.269E-03 | 5.110E-03 | PG-GT      |
| EHADH-AS1  | EHADH domain containing 1 [Source:HGNC Symbol;Acc:44133]                                                    | chr3  | 184903743 | 184903743 | 167         | 0.051    | 1        | 1         | 1.275E-03 | 5.121E-03 | PG-GT      |
| C3orf14    | chromosome 3 open reading frame 14 [Source:HGNC Symbol;Acc:25024]                                           | chr3  | 62304648  | 62321888  | 167         | 0.051    | 1        | 1         | 1.275E-03 | 5.121E-03 | PG-GT      |
| COMM7      | COMM domain containing 7 [Source:HGNC Symbol;Acc:16223]                                                     | chr20 | 31290493  | 31331814  | 142         | 0.051    | 1        | 1         | 1.279E-03 | 5.126E-03 | PG-GT      |
| CREG1      | cellular repressor of E1A-stimulated genes 1 [Source:HGNC Symbol;Acc:2351]                                  | chr1  | 167498914 | 167523004 | 145         | 0.051    | 1        | 1         | 1.280E-03 | 5.126E-03 | PG-GT      |
| LY11       | LY11 (S. cerevisiae) [Source:HGNC Symbol;Acc:21173]                                                         | chr1  | 16418481  | 16418481  | 1           | 0.051    | 1        | 1         | 1.283E-03 | 5.126E-03 | PG-GT      |
| LYRM5      | LYR motif containing 5 [Source:HGNC Symbol;Acc:27052]                                                       | chr12 | 25348150  | 25362799  | 135         | 0.052    | 1        | 1         | 1.291E-03 | 5.151E-03 | PG-GT      |
| SMIM7      | small integral membrane protein 7 [Source:HGNC Symbol;Acc:28419]                                            | chr19 | 16741562  | 16771253  | 98          | 0.052    | 1        | 1         | 1.292E-03 | 5.151E-03 | PG-GT      |
| FEM1B      | fem-1 homolog b (C. elegans) [Source:HGNC Symbol;Acc:3649]                                                  | chr15 | 68570141  | 68588203  | 149         | 0.052    | 1        | 1         | 1.297E-03 | 5.157E-03 | PG-GT      |
| KIAA0101   | KIAA0101 [Source:HGNC Symbol;Acc:28961]                                                                     | chr15 | 64657193  | 64679886  | 149         | 0.052    | 1        | 1         | 1.297E-03 | 5.157E-03 | PG-GT      |
| SK         | vki1 sarcoma viral oncogene homolog (avian) [Source:HGNC Symbol;Acc:10896]                                  | chr1  | 21601134  | 22181003  | 147         | 0.052    | 1        | 1         | 1.315E-03 | 5.218E-03 | PG-GT      |
| PCID2      | PCI domain containing 2 [Source:HGNC Symbol;Acc:25653]                                                      | chr13 | 113831891 | 113863029 | 215         | 0.052    | 1        | 1         | 1.316E-03 | 5.218E-03 | PG-GT      |
| MED27      | mediator complex subunit 27 [Source:HGNC Symbol;Acc:2377]                                                   | chr9  | 134735494 | 134955295 | 1234        | 0.463    | 3        | 2         | 1.325E-03 | 5.245E-03 | PG-GT      |
| MAP3K1     | mitogen-activated protein kinase kinase kinase 1, E3 ubiquitin protein ligase [Source:HGNC Symbol;Acc:6848] | chr5  | 56111401  | 56191979  | 787         | 0.212    | 2        | 2         | 1.337E-03 | 5.308E-03 | PG-GT      |
| ZNF766     | zinc finger protein 766 [Source:HGNC Symbol;Acc:29063]                                                      | chr16 | 52772824  | 52799577  | 101         | 0.053    | 1        | 1         | 1.371E-03 | 5.452E-03 | PG-GT      |
| ZNF528     | zinc finger protein 528 [Source:HGNC Symbol;Acc:29384]                                                      | chr19 | 52901102  | 52921665  | 101         | 0.053    | 1        | 1         | 1.371E-03 | 5.452E-03 | PG-GT      |
| WEE1       | WEE1 homolog (S. pombe) [Source:HGNC Symbol;Acc:12761]                                                      | chr11 | 9595228   | 9615004   | 154         | 0.053    | 1        | 1         | 1.378E-03 | 5.426E-03 | PG-GT      |
| THAP4      | THAP domain containing 4 [Source:HGNC Symbol;Acc:23197]                                                     | chr2  | 24252320  | 24257684  | 188         | 0.054    | 1        | 1         | 1.394E-03 | 5.484E-03 | PG-GT      |
| LRCR23     | leucine rich repeat containing 23 [Source:HGNC Symbol;Acc:9138]                                             | chr3  | 8982733   | 9023157   | 141         | 0.054    | 1        | 1         | 1.409E-03 | 5.521E-03 | PG-GT      |
| DARS       | aspartyl-tRNA synthetase [Source:HGNC Symbol;Acc:2678]                                                      | chr1  | 136664247 | 136743670 | 753         | 0.215    | 2        | 1         | 1.417E-03 | 5.552E-03 | PG-GT      |
| ZKSCAN1    | zinc finger with KRAB and SCAN domains 1 [Source:HGNC Symbol;Acc:13101]                                     | chr7  | 99613204  | 99639312  | 146         | 0.054    | 1        | 1         | 1.418E-03 | 5.552E-03 | PG-GT      |
| PRPF3      | PRPF3 pre-mRNA processing factor 3 homolog (S. cerevisiae) [Source:HGNC Symbol;Acc:17348]                   | chr1  | 150233925 | 150325671 | 153         | 0.054    | 1        | 1         | 1.423E-03 | 5.556E-03 | PG-GT      |
| UBRF5      | ubiquitin protein ligase E3 component n-recognin 5 [Source:HGNC Symbol;Acc:18600]                           | chr10 | 103926540 | 103926540 | 13          | 0.054    | 1        | 1         | 1.423E-03 | 5.556E-03 | PG-GT      |
| ZNF510     | zinc finger protein 510 [Source:HGNC Symbol;Acc:29161]                                                      | chr9  | 99518147  | 99540411  | 145         | 0.054    | 1        | 1         | 1.426E-03 | 5.556E-03 | PG-GT      |
| LRSAM1     | leucine rich repeat and sterile alpha motif containing 1 [Source:HGNC Symbol;Acc:25135]                     | chr9  | 130213765 | 130268780 | 145         | 0.054    | 1        | 1         | 1.426E-03 | 5.556E-03 | PG-GT      |
| SLC25A32   | solute carrier family 25 (mitochondrial folate carrier), member 32 [Source:HGNC Symbol;Acc:29683]           | chr1  | 641410663 | 64042717  | 159         | 0.054    | 1        | 1         | 1.431E-03 | 5.566E-03 | PG-GT      |
| PCDH8-AS2  | PCDH8 domain containing 2 [Source:HGNC Symbol;Acc:30992]                                                    | chr16 | 87498163  | 87498163  | 1           | 0.054    | 1        | 1         | 1.439E-03 | 5.621E-03 | PG-GT      |
| CIRH1A     | cirrhosis, autosomal recessive 1A (cirrh) [Source:HGNC Symbol;Acc:1983]                                     | chr16 | 169519194 | 169420941 | 164         | 0.055    | 1        | 1         | 1.455E-03 | 5.637E-03 | PG-GT      |
| NUPL2      | nucleoporin like 2 [Source:HGNC Symbol;Acc:17010]                                                           | chr7  | 23214426  | 23240830  | 148         | 0.055    | 1        | 1         | 1.456E-03 | 5.637E-03 | PG-GT      |
| NECAB1     | N-terminal EF-hand calcium binding protein 1 [Source:HGNC Symbol;Acc:20983]                                 | chr8  | 91803778  | 91971636  | 1367        | 0.475    | 3        | 2         | 1.457E-03 | 5.637E-03 | PG-GT      |
| ERRF1      | ERRF1 receptor feedback inhibitor 1 [Source:HGNC Symbol;Acc:18185]                                          | chr16 | 8094467   | 8094467   | 1           | 0.055    | 1        | 1         | 1.459E-03 | 5.639E-03 | PG-GT      |
| ADPRM      | ADP-ribose/CDP-alcohol diphosphatase, manganese-dependent [Source:HGNC Symbol;Acc:30925]                    | chr17 | 10600911  | 10614550  | 109         | 0.055    | 1        | 1         | 1.469E-03 | 5.669E-03 | PG-GT      |
| USO1       | USO1 vesicle transport factor [Source:HGNC Symbol;Acc:30904]                                                | chr4  | 76649777  | 76735362  | 771         | 0.218    | 2        | 2         | 1.473E-03 | 5.677E-03 | PG-GT      |
| CATSPER3   | cation channel, sperm associated 3 [Source:HGNC Symbol;Acc:20819]                                           | chr5  | 134303596 | 134347392 | 206         | 0.056    | 1        | 1         | 1.485E-03 | 5.715E-03 | PG-GT      |
| KDM4C      | lysine-specific demethylase 4C [Source:HGNC Symbol;Acc:17071]                                               | chr7  | 16720863  | 16720863  | 1           | 0.056    | 1        | 1         | 1.488E-03 | 5.715E-03 | PG-GT      |
| TIMM23B    | translocase of inner mitochondrial membrane 23 homolog B (yeast) [Source:HGNC Symbol;Acc:23581]             | chr10 | 51371390  | 51387768  | 156         | 0.056    | 1        | 1         | 1.493E-03 | 5.732E-03 | PG-GT      |
| C4orf21    | chromosome 4 open reading frame 21 [Source:HGNC Symbol;Acc:25654]                                           | chr4  | 113460492 | 113558151 | 777         | 0.220    | 2        | 1         | 1.506E-03 | 5.772E-03 | PG-GT      |
| PROSPIN    | prospirin [Source:HGNC Symbol;Acc:3498]                                                                     | chr10 | 7376055   | 73811126  | 157         | 0.056    | 1        | 1         | 1.512E-03 | 5.788E-03 | PG-GT      |
| NBR2       | neurabin 2 [Source:HGNC Symbol;Acc:28953]                                                                   | chr17 | 41277627  | 41293688  | 111         | 0.056    | 1        | 1         | 1.523E-03 | 5.820E-03 | PG-GT      |
| PKM        | pyruvate kinase, muscle [Source:HGNC Symbol;Acc:9021]                                                       | chr15 | 72491370  | 72524164  | 162         | 0.056    | 1        | 1         | 1.529E-03 | 5.828E-03 | PG-GT      |
| FAM221A    | family with sequence similarity 221, member A [Source:HGNC Symbol;Acc:29797]                                | chr7  | 23719749  | 23742868  | 152         | 0.056    | 1        | 1         | 1.534E-03 | 5.828E-03 | PG-GT      |
| USP9N      | USP9N N-terminal like [Source:HGNC Symbol;Acc:16588]                                                        | chr10 | 11025209  | 11653753  | 1351        | 0.482    | 3        | 2         | 1.536E-03 | 5.828E-03 | PG-GT      |
| TXLNC      | TXLNC [Source:HGNC Symbol;Acc:18578]                                                                        | chr16 | 18694569  | 18694569  | 1           | 0.056    | 1        | 1         | 1.538E-03 | 5.828E-03 | PG-GT      |
| MYO9A      | myosin IXA [Source:HGNC Symbol;Acc:7608]                                                                    | chr15 | 72114632  | 72410918  | 2346        | 0.816    | 4        | 2         | 1.537E-03 | 5.828E-03 | PG-GT      |
| SPTLC2     | spermin palmitoyltransferase, long chain base subunit 2 [Source:HGNC Symbol;Acc:11278]                      | chr14 | 79773240  | 79803116  | 817         | 0.222    | 2        | 2         | 1.537E-03 | 5.828E-03 | PG-GT      |
| BICD2      | bicaudal D homolog 2 (Drosophila) [Source:HGNC Symbol;Acc:17208]                                            | chr9  | 95473645  | 95527094  | 151         | 0.057    | 1        | 1         | 1.545E-03 | 5.833E-03 | PG-GT      |
| CAMK2D     | calcium/calmodulin-dependent protein kinase II delta [Source:HGNC Symbol;Acc:1462]                          | chr1  | 114372188 | 114372188 | 1           | 0.057    | 1        | 1         | 1.543E-03 | 5.833E-03 | PG-GT      |
| HEBP1      | heme binding protein 1 [Source:HGNC Symbol;Acc:17176]                                                       | chr12 | 13127798  | 13153207  | 148         | 0.057    | 1        | 1         | 1.546E-03 | 5.833E-03 | PG-GT      |
| STX17      | syntaxin 17 [Source:HGNC Symbol;Acc:11432]                                                                  | chr9  | 102688915 | 102732618 | 592         | 0.222    | 2        | 2         | 1.546E-03 | 5.833E-03 | PG-GT      |
| STRADB     | STE20-related kinase adaptor beta [Source:HGNC Symbol;Acc:13205]                                            | chr2  | 202252581 | 202345589 | 778         | 0.222    | 2        | 2         | 1.555E-03 | 5.843E-03 | PG-GT      |
| SPEN       | splicing factor, proline- and serine-rich [Source:HGNC Symbol;Acc:17575]                                    | chr1  | 161743269 | 16268685  | 627         | 0.222    | 2        | 2         | 1.557E-03 | 5.843E-03 | PG-GT      |
| SLC2A2     | solute carrier family 26 (sulfate transporter), member 2 [Source:HGNC Symbol;Acc:10994]                     | chr5  | 149340300 | 149373100 | 211         | 0.057    | 1        | 1         | 1.557E-03 | 5.843E-03 | PG-GT      |
| TBL1X      | transducin (beta)-like 1X-linked [Source:HGNC Symbol;Acc:11585]                                             | chrX  | 9431335   | 9687780   | 1336        | 0.223    | 2        | 1         | 1.557E-03 | 5.843E-03 | PG-GT      |
| UBN1       | ubiquitin 1 [Source:HGNC Symbol;Acc:12506]                                                                  | chr16 | 4899668   | 4932361   | 171         | 0.057    | 1        | 1         | 1.579E-03 | 5.907E-03 | PG-GT      |
| MARRK3     | marck-related kinase 3 [Source:HGNC Symbol;Acc:6897]                                                        | chr1  | 103881129 | 10396369  | 627         | 0.223    | 2        | 2         | 1.580E-03 | 5.907E-03 | PG-GT      |
| PHLPP1     | PH domain and leucine rich repeat protein phosphatase 1 [Source:HGNC Symbol;Acc:20610]                      | chr18 | 60382672  | 60647666  | 2029        | 0.486    | 3        | 2         | 1.580E-03 | 5.907E-03 | PG-GT      |
| XP06       | exportin 6 [Source:HGNC Symbol;Acc:19733]                                                                   | chr16 | 28109300  | 28223241  | 669         | 0.224    | 2        | 1         | 1.587E-03 | 5.925E-03 | PG-GT      |
| C1orf198   | chromosome 1 open reading frame 198 [Source:HGNC Symbol;Acc:25900]                                          | chr1  | 23097266  | 231005335 | 162         | 0.058    | 1        | 1         | 1.592E-03 | 5.933E-03 | PG-GT      |
| NEU3       | neuraminidase 3 [Source:HGNC Symbol;Acc:1769]                                                               | chr11 | 74762917  | 74        |             |          |          |           |           |           |            |

table S2. Genes with significant transcription integrations in RKO BRAF<sup>mut</sup> cells after selection in low glucose medium

| Gene ID      | Description                                                                                                                       | Chrom | Start     | End       | # TAA sites | Expected | Observed | Libraries | P         | FDR       | Transposon |
|--------------|-----------------------------------------------------------------------------------------------------------------------------------|-------|-----------|-----------|-------------|----------|----------|-----------|-----------|-----------|------------|
| CDK19        | cyclin-dependent kinase 19 [Source:HGNC Symbol:Acc:19338]                                                                         | chr6  | 110931181 | 111371161 | 1484        | 0.510    | 3        | 2         | 1.878E-03 | 6.478E-03 | PB-GT      |
| ATBC1        | AT-binding cassette, subfamily C (CFTR-related), member 1 [Source:HGNC Symbol:Acc:51]                                             | chr6  | 17913954  | 17942993  | 710         | 0.238    | 1        | 1         | 1.478E-03 | 6.478E-03 | PB-GT      |
| HIF3A        | hypoxia inducible factor 3, alpha subunit [Source:HGNC Symbol:Acc:15825]                                                          | chr9  | 46800303  | 46848609  | 119         | 0.063    | 1        | 1         | 1.891E-03 | 6.515E-03 | PB-GT      |
| MELK         | maternal embryonic leucine zipper kinase [Source:HGNC Symbol:Acc:16870]                                                           | chr9  | 36572859  | 36677789  | 636         | 0.239    | 2        | 1         | 1.894E-03 | 6.518E-03 | PB-GT      |
| DCAF12       | DBP1 and CUL4 associated factor 12 [Source:HGNC Symbol:Acc:19911]                                                                 | chr9  | 34028635  | 34127397  | 168         | 0.063    | 1        | 1         | 1.904E-03 | 6.535E-03 | PB-GT      |
| ARHGAP40     | Rho GTPase activating protein 40 [Source:HGNC Symbol:Acc:16226]                                                                   | chr9  | 37230577  | 37293678  | 174         | 0.063    | 1        | 1         | 1.906E-03 | 6.535E-03 | PB-GT      |
| YWHA8        | tyrosine 3-monooxygenase/tryptophan 5-monooxygenase activation protein, beta polypeptide [Source:HGNC Symbol:Acc:1284]            | chr20 | 45514317  | 45537173  | 174         | 0.063    | 1        | 1         | 1.906E-03 | 6.535E-03 | PB-GT      |
| KCNAB1       | potassium voltage-gated channel, shaker-related subfamily, member 1 (episodic ataxia with myokymia) [Source:HGNC Symbol:Acc:1284] | chr12 | 5019071   | 5040527   | 165         | 0.063    | 1        | 1         | 1.913E-03 | 6.544E-03 | PB-GT      |
| METTL20      | methyltransferase like 20 [Source:HGNC Symbol:Acc:28739]                                                                          | chr12 | 31800094  | 31826048  | 165         | 0.063    | 1        | 1         | 1.913E-03 | 6.544E-03 | PB-GT      |
| SPIN1        | spin1 [Source:HGNC Symbol:Acc:11243]                                                                                              | chr12 | 91033334  | 91093609  | 639         | 0.240    | 2        | 2         | 1.919E-03 | 6.558E-03 | PB-GT      |
| EDEM1        | ER degradation enhancer, mannosidase alpha-like 1 [Source:HGNC Symbol:Acc:18967]                                                  | chr9  | 5229331   | 5261642   | 206         | 0.063    | 1        | 1         | 1.925E-03 | 6.563E-03 | PB-GT      |
| SPG11        | spastic paraplegia 11 (autosomal recessive) [Source:HGNC Symbol:Acc:11228]                                                        | chr15 | 44955894  | 44955876  | 690         | 0.240    | 2        | 1         | 1.926E-03 | 6.563E-03 | PB-GT      |
| ZNF37A       | zinc finger protein 37A [Source:HGNC Symbol:Acc:13102]                                                                            | chr10 | 38383264  | 38412276  | 178         | 0.064    | 1        | 1         | 1.934E-03 | 6.585E-03 | PB-GT      |
| ANXA1        | annexin A1 [Source:HGNC Symbol:Acc:333]                                                                                           | chr1  | 8014261   | 8045565   | 182         | 0.065    | 1        | 1         | 1.939E-03 | 6.592E-03 | PB-GT      |
| TARS         | threonyl-tRNA synthetase [Source:HGNC Symbol:Acc:11572]                                                                           | chr5  | 33440802  | 33469644  | 237         | 0.064    | 1        | 1         | 1.955E-03 | 6.639E-03 | PB-GT      |
| GGH          | gamma-glutamyl hydrolase (conjugase, folypolygamma-glutamyl hydrolase) [Source:HGNC Symbol:Acc:4248]                              | chr6  | 63927638  | 63951730  | 237         | 0.064    | 1        | 1         | 1.967E-03 | 6.671E-03 | PB-GT      |
| TP53TG5      | TP53 target 5 [Source:HGNC Symbol:Acc:18566]                                                                                      | chr20 | 44020526  | 44036529  | 177         | 0.064    | 1        | 1         | 1.971E-03 | 6.672E-03 | PB-GT      |
| DUSP16       | dual specificity phosphatase 16 [Source:HGNC Symbol:Acc:17909]                                                                    | chr12 | 12628829  | 12715317  | 637         | 0.242    | 2        | 2         | 1.972E-03 | 6.672E-03 | PB-GT      |
| HKDC1        | hexokinase domain containing 1 [Source:HGNC Symbol:Acc:23302]                                                                     | chr10 | 70980059  | 71027135  | 180         | 0.064    | 1        | 1         | 1.977E-03 | 6.683E-03 | PB-GT      |
| HMGCR        | 3-hydroxy-3-methylglutaryl-CoA reductase [Source:HGNC Symbol:Acc:5006]                                                            | chr5  | 74632154  | 74657929  | 239         | 0.064    | 1        | 1         | 1.987E-03 | 6.710E-03 | PB-GT      |
| PGAP1        | post-GPI attachment to proteins 1 [Source:HGNC Symbol:Acc:25712]                                                                  | chr2  | 97769990  | 97779250  | 860         | 0.243    | 2        | 1         | 1.997E-03 | 6.719E-03 | PB-GT      |
| PAR3         | chromosome 7 open reading frame 73 [Source:HGNC Symbol:Acc:16389]                                                                 | chr1  | 8014261   | 8045565   | 182         | 0.065    | 1        | 1         | 1.999E-03 | 6.719E-03 | PB-GT      |
| GNL2         | guanine nucleotide binding protein-like 2 (nuclear) [Source:HGNC Symbol:Acc:29925]                                                | chr1  | 38032417  | 38061536  | 182         | 0.065    | 1        | 1         | 1.999E-03 | 6.719E-03 | PB-GT      |
| PDZK1        | PDZ domain containing 1 [Source:HGNC Symbol:Acc:8821]                                                                             | chr1  | 145726918 | 145764074 | 182         | 0.065    | 1        | 1         | 1.999E-03 | 6.719E-03 | PB-GT      |
| ARHGAP42     | Rho GTPase activating protein 42 [Source:HGNC Symbol:Acc:26545]                                                                   | chr11 | 100558384 | 100862668 | 300         | 0.867    | 4        | 2         | 2.003E-03 | 6.722E-03 | PB-GT      |
| ASAH1        | N-acylsphingosine amidohydrolase (acid ceramidase) 1 [Source:HGNC Symbol:Acc:735]                                                 | chr9  | 19713954  | 19742993  | 260         | 0.063    | 1        | 1         | 2.008E-03 | 6.732E-03 | PB-GT      |
| AK8          | adenylate kinase 8 [Source:HGNC Symbol:Acc:26522]                                                                                 | chr9  | 135600805 | 135754164 | 650         | 0.244    | 2        | 1         | 2.014E-03 | 6.732E-03 | PB-GT      |
| CASP4        | caspace 4, apoptosis-related cysteine peptidase [Source:HGNC Symbol:Acc:1505]                                                     | chr11 | 104813593 | 104840163 | 187         | 0.065    | 1        | 1         | 2.016E-03 | 6.732E-03 | PB-GT      |
| ZNF701       | zinc finger protein 701 [Source:HGNC Symbol:Acc:25597]                                                                            | chr19 | 63059075  | 63090427  | 123         | 0.065    | 1        | 1         | 2.017E-03 | 6.732E-03 | PB-GT      |
| RARRS1       | retinoic acid receptor responder (atazarone induced) 1 [Source:HGNC Symbol:Acc:9667]                                              | chr3  | 158414681 | 158450485 | 211         | 0.065    | 1        | 1         | 2.018E-03 | 6.732E-03 | PB-GT      |
| C7orf73      | chromosome 7 open reading frame 73 [Source:HGNC Symbol:Acc:41909]                                                                 | chr7  | 19592744  | 19637186  | 175         | 0.065    | 1        | 1         | 2.022E-03 | 6.733E-03 | PB-GT      |
| SPG7         | spastic paraplegia 7 (pure and complicated autosomal recessive) [Source:HGNC Symbol:Acc:11237]                                    | chr16 | 89573235  | 89624176  | 194         | 0.065    | 1        | 1         | 2.022E-03 | 6.733E-03 | PB-GT      |
| MANBA        | mannosidase, beta A, lysosomal [Source:HGNC Symbol:Acc:6831]                                                                      | chr4  | 103552660 | 103682111 | 864         | 0.245    | 2        | 1         | 2.033E-03 | 6.760E-03 | PB-GT      |
| ATFB1        | ATPase, Na <sup>+</sup> /K <sup>+</sup> transporting, beta 1 polypeptide [Source:HGNC Symbol:Acc:804]                             | chr1  | 169074935 | 169101960 | 184         | 0.065    | 1        | 1         | 2.043E-03 | 6.774E-03 | PB-GT      |
| DNAM2        | DNM-activated regulated autophagy modulator 2 [Source:HGNC Symbol:Acc:28768]                                                      | chr1  | 11658985  | 11689298  | 84          | 0.065    | 1        | 1         | 2.043E-03 | 6.774E-03 | PB-GT      |
| DUSP14       | dual specificity phosphatase 14 [Source:HGNC Symbol:Acc:17007]                                                                    | chr17 | 35849937  | 35873603  | 129         | 0.065    | 1        | 1         | 2.044E-03 | 6.774E-03 | PB-GT      |
| HESX1        | homeobox protein 1 [Source:HGNC Symbol:Acc:4877]                                                                                  | chr3  | 57231944  | 57260549  | 213         | 0.066    | 1        | 1         | 2.055E-03 | 6.802E-03 | PB-GT      |
| UBE2J1       | ubiquitin-conjugating enzyme E2 variant 1 [Source:HGNC Symbol:Acc:12494]                                                          | chr20 | 46807561  | 46732496  | 181         | 0.066    | 1        | 1         | 2.059E-03 | 6.807E-03 | PB-GT      |
| PEXSL-AS2    | PEXSL domain containing 2 [Source:HGNC Symbol:Acc:41252]                                                                          | chr2  | 179016017 | 179016017 | 214         | 0.066    | 1        | 1         | 2.041E-03 | 6.807E-03 | PB-GT      |
| TIMMDC1      | translocase of inner mitochondrial membrane domain containing 1 [Source:HGNC Symbol:Acc:1321]                                     | chr3  | 119217379 | 119243937 | 214         | 0.066    | 1        | 1         | 2.074E-03 | 6.841E-03 | PB-GT      |
| SEC22B       | SEC22 vesicle trafficking protein homolog B (C. cerevisiae) (gene/pseudogene) [Source:HGNC Symbol:Acc:10700]                      | chr1  | 145096220 | 145116922 | 186         | 0.066    | 1        | 1         | 2.088E-03 | 6.859E-03 | PB-GT      |
| ARPC2        | arctin related protein 23 complex, subunit 2, $\beta$ 4a [Source:HGNC Symbol:Acc:705]                                             | chr2  | 219581817 | 219118079 | 231         | 0.066    | 1        | 1         | 2.088E-03 | 6.859E-03 | PB-GT      |
| EPCAM        | epithelial cell adhesion molecule [Source:HGNC Symbol:Acc:22090]                                                                  | chr12 | 476172297 | 476174740 | 231         | 0.066    | 1        | 1         | 2.088E-03 | 6.859E-03 | PB-GT      |
| RCN2         | reticulocalbin 2, EF-hand calcium binding domain [Source:HGNC Symbol:Acc:9935]                                                    | chr15 | 77223960  | 77242601  | 190         | 0.066    | 1        | 1         | 2.089E-03 | 6.859E-03 | PB-GT      |
| RNASEH2B-AS1 | RNASEH2B antisense RNA 1 [Source:HGNC Symbol:Acc:39967]                                                                           | chr13 | 51450822  | 51484848  | 273         | 0.066    | 1        | 1         | 2.102E-03 | 6.893E-03 | PB-GT      |
| ATF10D       | ATPase, class V, type 10D [Source:HGNC Symbol:Acc:13549]                                                                          | chr4  | 47467305  | 47595503  | 875         | 0.248    | 2        | 1         | 2.107E-03 | 6.902E-03 | PB-GT      |
| TUBE1        | tubulin, epsilon 1 [Source:HGNC Symbol:Acc:20778]                                                                                 | chr12 | 112391980 | 112391980 | 194         | 0.067    | 1        | 1         | 2.107E-03 | 6.902E-03 | PB-GT      |
| GPR115       | G protein-coupled receptor 115 [Source:HGNC Symbol:Acc:19011]                                                                     | chr6  | 47653600  | 47689757  | 194         | 0.067    | 1        | 1         | 2.124E-03 | 6.939E-03 | PB-GT      |
| PALB2        | partner and localizer of BRCA2 [Source:HGNC Symbol:Acc:26144]                                                                     | chr16 | 23614488  | 23652831  | 199         | 0.067    | 1        | 1         | 2.126E-03 | 6.939E-03 | PB-GT      |
| POGL         | polymerase (DNA directed), theta [Source:HGNC Symbol:Acc:9168]                                                                    | chr3  | 121150278 | 121264853 | 809         | 0.249    | 2        | 1         | 2.134E-03 | 6.958E-03 | PB-GT      |
| SLC15A4      | solute carrier family 15, member 4 [Source:HGNC Symbol:Acc:22090]                                                                 | chr1  | 129277739 | 129277739 | 175         | 0.067    | 1        | 1         | 2.147E-03 | 6.987E-03 | PB-GT      |
| TGFBI        | transforming growth factor, beta 1 [Source:HGNC Symbol:Acc:11766]                                                                 | chr19 | 41807492  | 41859816  | 127         | 0.067    | 1        | 1         | 2.148E-03 | 6.987E-03 | PB-GT      |
| CLIC4        | chloride intracellular channel 4 [Source:HGNC Symbol:Acc:13518]                                                                   | chr1  | 25071848  | 25170815  | 704         | 0.250    | 2        | 1         | 2.159E-03 | 7.017E-03 | PB-GT      |
| AADC2        | arylethanolamine deacetylase-like 2 [Source:HGNC Symbol:Acc:24427]                                                                | chr3  | 151451704 | 151479127 | 219         | 0.067    | 1        | 1         | 2.170E-03 | 7.028E-03 | PB-GT      |
| SLC16A8      | solute carrier family 16, member 8 [Source:HGNC Symbol:Acc:22090]                                                                 | chr12 | 68283408  | 68283408  | 133         | 0.067    | 1        | 1         | 2.170E-03 | 7.028E-03 | PB-GT      |
| ZSWIM7       | zinc finger, SWIM-type containing 7 [Source:HGNC Symbol:Acc:26993]                                                                | chr17 | 15897874  | 15903301  | 133         | 0.067    | 1        | 1         | 2.170E-03 | 7.028E-03 | PB-GT      |
| TF2M         | transcription factor B2, mitochondrial [Source:HGNC Symbol:Acc:18559]                                                             | chr1  | 24673862  | 246729626 | 190         | 0.067    | 1        | 1         | 2.175E-03 | 7.036E-03 | PB-GT      |
| SLC33A1      | solute carrier family 33 (acetyl-CoA transporter), member 1 [Source:HGNC Symbol:Acc:95]                                           | chr3  | 15544305  | 155572218 | 220         | 0.068    | 1        | 1         | 2.189E-03 | 7.074E-03 | PB-GT      |
| DNMT3B       | DNMT3B-AS1/methyltransferase 3 beta [Source:HGNC Symbol:Acc:2979]                                                                 | chr1  | 51395162  | 51395162  | 187         | 0.068    | 1        | 1         | 2.194E-03 | 7.083E-03 | PB-GT      |
| CLK4         | CDK-like kinase 4 [Source:HGNC Symbol:Acc:13659]                                                                                  | chr5  | 178029665 | 178057616 | 252         | 0.068    | 1        | 1         | 2.204E-03 | 7.102E-03 | PB-GT      |
| TAIF2        | TAIF2 RNA polymerase II, TATA box binding protein (TBP)-associated factor, 20kDa [Source:HGNC Symbol:Acc:11545]                   | chr1  | 28915835  | 28989597  | 192         | 0.068    | 1        | 1         | 2.220E-03 | 7.142E-03 | PB-GT      |
| NCOD4        | nuclear receptor coactivator 4 [Source:HGNC Symbol:Acc:7671]                                                                      | chr10 | 51565108  | 51590734  | 191         | 0.068    | 1        | 1         | 2.220E-03 | 7.142E-03 | PB-GT      |
| ESD          | esterase D [Source:HGNC Symbol:Acc:3456]                                                                                          | chr12 | 47345367  | 47345367  | 282         | 0.068    | 1        | 1         | 2.191E-03 | 7.142E-03 | PB-GT      |
| CEP250       | centrosomal protein 250kDa [Source:HGNC Symbol:Acc:1859]                                                                          | chr20 | 34042985  | 34099804  | 189         | 0.068    | 1        | 1         | 2.241E-03 | 7.191E-03 | PB-GT      |
| ADAT2        | adenosine deaminase, tRNA-specific 2 [Source:HGNC Symbol:Acc:21172]                                                               | chr6  | 143748126 | 143771810 | 200         | 0.069    | 1        | 1         | 2.255E-03 | 7.228E-03 | PB-GT      |
| SQULE        | squalene epoxidase [Source:HGNC Symbol:Acc:11279]                                                                                 | chr8  | 126010739 | 126034825 | 201         | 0.069    | 1        | 1         | 2.255E-03 | 7.253E-03 | PB-GT      |
| STMN1        | stathmin domain containing 1 [Source:HGNC Symbol:Acc:44668]                                                                       | chr6  | 171024689 | 171024689 | 201         | 0.069    | 1        | 1         | 2.255E-03 | 7.253E-03 | PB-GT      |
| CLCN4        | chloride channel, voltage-sensitive 4 [Source:HGNC Symbol:Acc:2022]                                                               | chrX  | 10125024  | 10205700  | 415         | 0.069    | 1        | 1         | 2.283E-03 | 7.295E-03 | PB-GT      |
| TRAF3IP2-AS1 | TRAF3IP2 antisense RNA 1 [Source:HGNC Symbol:Acc:40005]                                                                           | chr6  | 111804714 | 111919505 | 743         | 0.255    | 2        | 2         | 2.291E-03 | 7.321E-03 | PB-GT      |
| NUP214       | nucleoporin 214kDa [Source:HGNC Symbol:Acc:8064]                                                                                  | chr9  | 134000498 | 134110057 | 681         | 0.255    | 2        | 1         | 2.296E-03 | 7.321E-03 | PB-GT      |
| DERL1        | derlin 1 [Source:HGNC Symbol:Acc:28454]                                                                                           | chr12 | 124025404 | 124025404 | 203         | 0.070    | 1        | 1         | 2.340E-03 | 7.354E-03 | PB-GT      |
| THAP6        | THAP domain containing 6 [Source:HGNC Symbol:Acc:23189]                                                                           | chr4  | 76439156  | 76475683  | 246         | 0.070    | 1        | 1         | 2.316E-03 | 7.359E-03 | PB-GT      |
| ILF3         | interleukin enhancer binding factor 3, 90kDa [Source:HGNC Symbol:Acc:6038]                                                        | chr19 | 10764937  | 10803903  | 132         | 0.070    | 1        | 1         | 2.316E-03 | 7.359E-03 | PB-GT      |
| OGN          | osteglycin [Source:HGNC Symbol:Acc:8128]                                                                                          | chr9  | 95146249  | 95169878  | 186         | 0.070    | 1        | 1         | 2.323E-03 | 7.363E-03 | PB-GT      |
| TYW5         | tRNA-y <sup>W</sup> synthetizing protein [Source:HGNC Symbol:Acc:26754]                                                           | chr2  | 200794968 | 200829498 | 244         | 0.070    | 1        | 1         | 2.332E-03 | 7.383E-03 | PB-GT      |
| RAPGEF1      | Rap guanine nucleotide exchange factor (GEF) 1 [Source:HGNC Symbol:Acc:4568]                                                      | chr9  | 134452157 | 134615461 | 684         | 0.257    | 2        | 2         | 2.325E-03 | 7.383E-03 | PB-GT      |
| TAOK1        | TAO kinase 1 [Source:HGNC Symbol:Acc:29259]                                                                                       | chr17 | 27717482  | 27878922  | 1072        | 0.543    | 3        | 2         | 2.356E-03 | 7.453E-03 | PB-GT      |
| ZNF94        | zinc finger protein 94 [Source:HGNC Symbol:Acc:13159]                                                                             | chr12 | 133613878 | 133639895 | 184         | 0.070    | 1        |           |           |           |            |

table S2. Genes with significant transposon integrations in RKO BRAF<sup>WT</sup> cells after selection in low glucose medium

| Gene ID      | Description                                                                                                     | Chrom | Start     | End       | # TAA sites | Expected | Observed | Libraries | P         | FDR       | Transposon |
|--------------|-----------------------------------------------------------------------------------------------------------------|-------|-----------|-----------|-------------|----------|----------|-----------|-----------|-----------|------------|
| C4orf45      | chromosome 4 open reading frame 45 [Source:HGNC Symbol;Acc:26342]                                               | chr4  | 159814286 | 159959912 | 971         | 0.275    | 2        | 1         | 2.822E-03 | 8.355E-03 | PB-GT      |
| PTCH1        | patched 1 containing 1 [Source:HGNC Symbol;Acc:26392]                                                           | chrX  | 23332339  | 23333349  | 483         | 0.077    | 1        | 1         | 2.872E-03 | 8.381E-03 | PB-GT      |
| GT2F2R2D2    | GT2F2 repeat domain containing 2 [Source:HGNC Symbol;Acc:30775]                                                 | chr7  | 74210483  | 74267847  | 208         | 0.077    | 1        | 1         | 2.834E-03 | 8.364E-03 | PB-GT      |
| GT2F2R2B     | GT2F2 repeat domain containing 2B [Source:HGNC Symbol;Acc:33125]                                                | chr7  | 74508364  | 74565823  | 208         | 0.077    | 1        | 1         | 2.834E-03 | 8.364E-03 | PB-GT      |
| EIF3M        | eukaryotic translation initiation factor 3, subunit M [Source:HGNC Symbol;Acc:24460]                            | chr11 | 32605344  | 32627908  | 223         | 0.077    | 1        | 1         | 2.844E-03 | 8.378E-03 | PB-GT      |
| FMO2         | flavin containing monooxygenase 2 (non-functional) [Source:HGNC Symbol;Acc:3770]                                | chr1  | 171154347 | 17116822  | 218         | 0.077    | 1        | 1         | 2.844E-03 | 8.378E-03 | PB-GT      |
| BIVM         | basic immunoglobulin-like variable motif containing [Source:HGNC Symbol;Acc:16034]                              | chr13 | 103451399 | 103493885 | 319         | 0.077    | 1        | 1         | 2.849E-03 | 8.382E-03 | PB-GT      |
| FBXO33       | F-box protein 33 [Source:HGNC Symbol;Acc:19833]                                                                 | chr14 | 39866873  | 39901704  | 287         | 0.078    | 1        | 1         | 2.877E-03 | 8.456E-03 | PB-GT      |
| BCOR         | BCL6 corepressor [Source:HGNC Symbol;Acc:20893]                                                                 | chrX  | 39909088  | 40036582  | 468         | 0.078    | 1        | 1         | 2.887E-03 | 8.476E-03 | PB-GT      |
| RNF125       | RNF125 repeat domain 67 [Source:HGNC Symbol;Acc:21150]                                                          | chr8  | 124054208 | 124164393 | 812         | 0.278    | 2        | 2         | 2.917E-03 | 8.521E-03 | PB-GT      |
| WDYH1V       | WDYH1V motif containing 1 [Source:HGNC Symbol;Acc:25490]                                                        | chr8  | 124282965 | 124473470 | 228         | 0.078    | 1        | 1         | 2.898E-03 | 8.477E-03 | PB-GT      |
| IL13RA1      | interleukin 13 receptor, alpha 1 [Source:HGNC Symbol;Acc:5974]                                                  | chrX  | 117861535 | 117928502 | 469         | 0.078    | 1        | 1         | 2.899E-03 | 8.477E-03 | PB-GT      |
| CNCR3        | cyclin B3 [Source:HGNC Symbol;Acc:18709]                                                                        | chrX  | 49967364  | 50094909  | 469         | 0.078    | 1        | 1         | 2.899E-03 | 8.477E-03 | PB-GT      |
| WDR67        | WD repeat domain 67 [Source:HGNC Symbol;Acc:30888]                                                              | chr1  | 124054208 | 124164393 | 812         | 0.278    | 2        | 2         | 2.917E-03 | 8.521E-03 | PB-GT      |
| LRN2         | leucine rich repeat neuronal 2 [Source:HGNC Symbol;Acc:16914]                                                   | chr1  | 204586298 | 204654861 | 221         | 0.078    | 1        | 1         | 2.921E-03 | 8.525E-03 | PB-GT      |
| IYD          | iodotyrosine deiodinase [Source:HGNC Symbol;Acc:21071]                                                          | chr6  | 105690028 | 105727105 | 229         | 0.079    | 1        | 1         | 2.936E-03 | 8.561E-03 | PB-GT      |
| PLEKHF2      | pleckstrin homology domain containing, family F (with FYVE domain) member 2 [Source:HGNC Symbol;Acc:20757]      | chr8  | 96146032  | 96189912  | 230         | 0.079    | 1        | 1         | 2.948E-03 | 8.573E-03 | PB-GT      |
| EIF3L        | eukaryotic translation initiation factor 3, subunit L [Source:HGNC Symbol;Acc:16138]                            | chr22 | 38244875  | 38255144  | 158         | 0.079    | 1        | 1         | 2.956E-03 | 8.578E-03 | PB-GT      |
| TUBGCP4      | tubulin, gamma complex associated protein 4 [Source:HGNC Symbol;Acc:16691]                                      | chr15 | 43661419  | 43699293  | 227         | 0.079    | 1        | 1         | 2.957E-03 | 8.573E-03 | PB-GT      |
| SCAMP5       | secretory carrier membrane protein 5 [Source:HGNC Symbol;Acc:30386]                                             | chr15 | 75249560  | 75313837  | 227         | 0.079    | 1        | 1         | 2.957E-03 | 8.573E-03 | PB-GT      |
| TT033        | tetrahydropteridine repeat domain 33 [Source:HGNC Symbol;Acc:29599]                                             | chr5  | 40714577  | 40756077  | 293         | 0.079    | 1        | 1         | 2.958E-03 | 8.573E-03 | PB-GT      |
| UBOX5        | U-box domain containing 5 [Source:HGNC Symbol;Acc:17771]                                                        | chr20 | 3081922   | 3104942   | 218         | 0.079    | 1        | 1         | 2.960E-03 | 8.573E-03 | PB-GT      |
| SLC35B3      | solute carrier family 35, member B3 [Source:HGNC Symbol;Acc:21601]                                              | chr6  | 8413301   | 8435794   | 230         | 0.079    | 1        | 1         | 2.961E-03 | 8.573E-03 | PB-GT      |
| FGFR1        | fibroblast growth factor receptor 1 [Source:HGNC Symbol;Acc:3688]                                               | chr8  | 38266656  | 38326324  | 231         | 0.079    | 1        | 1         | 2.971E-03 | 8.580E-03 | PB-GT      |
| ZBTB43       | zinc finger and BTB domain containing 43 [Source:HGNC Symbol;Acc:17908]                                         | chr9  | 129567285 | 129600489 | 211         | 0.079    | 1        | 1         | 2.971E-03 | 8.580E-03 | PB-GT      |
| C10orf132    | C10orf132 open reading frame 132 [Source:HGNC Symbol;Acc:32018]                                                 | chr10 | 207396905 | 207403905 | 223         | 0.080    | 1        | 1         | 2.973E-03 | 8.580E-03 | PB-GT      |
| RBMT13       | RNA binding motif protein 17 [Source:HGNC Symbol;Acc:5944]                                                      | chr10 | 6130950   | 6159420   | 222         | 0.079    | 1        | 1         | 2.978E-03 | 8.585E-03 | PB-GT      |
| NT5C1B-RDH14 | NT5C1B-RDH14 readthrough [Source:HGNC Symbol;Acc:38831]                                                         | chr2  | 18736811  | 18770830  | 278         | 0.079    | 1        | 1         | 2.998E-03 | 8.620E-03 | PB-GT      |
| NT5C1B       | 5'-nucleotidase, cytosolic 1B [Source:HGNC Symbol;Acc:17818]                                                    | chr2  | 18737050  | 18770830  | 278         | 0.079    | 1        | 1         | 2.998E-03 | 8.620E-03 | PB-GT      |
| TMEM206      | transmembrane protein 206 [Source:HGNC Symbol;Acc:25593]                                                        | chr1  | 12537273  | 12558243  | 224         | 0.080    | 1        | 1         | 2.999E-03 | 8.620E-03 | PB-GT      |
| NDFUF1       | NADH dehydrogenase (ubiquinone), 1, subcomplex unknown, 1, 6kDa [Source:HGNC Symbol;Acc:7705]                   | chr4  | 140189304 | 140228304 | 291         | 0.080    | 1        | 1         | 3.020E-03 | 8.620E-03 | PB-GT      |
| PRB1         | proline-rich protein BstN1 subfamily 1 [Source:HGNC Symbol;Acc:9337]                                            | chr12 | 11054757  | 11258500  | 288         | 0.080    | 1        | 1         | 3.007E-03 | 8.620E-03 | PB-GT      |
| ACTR10       | actin-related protein 10 homolog (S. cerevisiae) [Source:HGNC Symbol;Acc:13732]                                 | chr14 | 58666798  | 58701750  | 294         | 0.080    | 1        | 1         | 3.015E-03 | 8.640E-03 | PB-GT      |
| FTSJ2        | FTSJ2 methyltransferase domain containing 2 [Source:HGNC Symbol;Acc:21077]                                      | chr6  | 37400995  | 37453663  | 233         | 0.080    | 1        | 1         | 3.037E-03 | 8.695E-03 | PB-GT      |
| LINC00588    | long intergenic non-protein coding RNA 658 [Source:HGNC Symbol;Acc:44315]                                       | chr2  | 5407542   | 5451740   | 221         | 0.080    | 1        | 1         | 3.042E-03 | 8.695E-03 | PB-GT      |
| TRIM14       | tripartite motif containing 14 [Source:HGNC Symbol;Acc:16283]                                                   | chr9  | 100831557 | 100881494 | 214         | 0.080    | 1        | 1         | 3.054E-03 | 8.727E-03 | PB-GT      |
| NOP58        | NOP58 ribonucleoprotein [Source:HGNC Symbol;Acc:29926]                                                          | chr2  | 203130439 | 203168389 | 281         | 0.080    | 1        | 1         | 3.061E-03 | 8.737E-03 | PB-GT      |
| STAMP6       | STAMP binding protein [Source:HGNC Symbol;Acc:16956]                                                            | chr7  | 74056086  | 74107786  | 282         | 0.081    | 1        | 1         | 3.082E-03 | 8.789E-03 | PB-GT      |
| ZNF68        | zinc finger protein 68 [Source:HGNC Symbol;Acc:33201]                                                           | chr2  | 53030905  | 53097717  | 156         | 0.080    | 1        | 1         | 3.085E-03 | 8.793E-03 | PB-GT      |
| RDH10        | retinol dehydrogenase 10 (all-trans) [Source:HGNC Symbol;Acc:19975]                                             | chr7  | 74206847  | 74237516  | 233         | 0.081    | 1        | 1         | 3.098E-03 | 8.816E-03 | PB-GT      |
| FNIP2        | folliculin interacting protein 2 [Source:HGNC Symbol;Acc:29280]                                                 | chr4  | 159690290 | 159822020 | 1006        | 0.285    | 2        | 2         | 3.115E-03 | 8.857E-03 | PB-GT      |
| AHCTF1       | AT hook containing transcription factor 1 [Source:HGNC Symbol;Acc:24618]                                        | chr1  | 247002400 | 247095280 | 805         | 0.286    | 2        | 2         | 3.144E-03 | 8.930E-03 | PB-GT      |
| B4GALNT2     | beta-4-N-acetyl-galactosaminyl transferase 2 [Source:HGNC Symbol;Acc:24136]                                     | chr1  | 47292822  | 47247361  | 161         | 0.080    | 1        | 1         | 3.145E-03 | 9.000E-03 | PB-GT      |
| TL1          | teloid-like 1 [Source:HGNC Symbol;Acc:11843]                                                                    | chr4  | 166794410 | 167025047 | 2086        | 0.591    | 3        | 2         | 3.176E-03 | 9.000E-03 | PB-GT      |
| CDK7         | cyclin-dependent kinase 7 [Source:HGNC Symbol;Acc:1778]                                                         | chr5  | 68530668  | 68573250  | 304         | 0.082    | 1        | 1         | 3.178E-03 | 9.000E-03 | PB-GT      |
| MB2D1        | Mal-21 domain containing 1 [Source:HGNC Symbol;Acc:21367]                                                       | chr4  | 74123238  | 74161999  | 239         | 0.082    | 1        | 1         | 3.191E-03 | 9.023E-03 | PB-GT      |
| TMEM508      | transmembrane protein 508 [Source:HGNC Symbol;Acc:12891]                                                        | chr20 | 34895318  | 34895318  | 287         | 0.082    | 1        | 1         | 3.193E-03 | 9.023E-03 | PB-GT      |
| YS1-DBND02   | YS1-DBND02 readthrough (non-protein coding) [Source:HGNC Symbol;Acc:33535]                                      | chr20 | 43991840  | 44039250  | 227         | 0.082    | 1        | 1         | 3.203E-03 | 9.043E-03 | PB-GT      |
| NDFUF5       | NADH dehydrogenase (ubiquinone) Fc-S protein 4, 18kDa [NADH-coenzyme Q reductase] [Source:HGNC Symbol;Acc:7711] | chr5  | 52866452  | 52979168  | 1070        | 0.288    | 2        | 2         | 3.224E-03 | 9.093E-03 | PB-GT      |
| MINK1        | MINK1 NADH dehydrogenase (ubiquinone) complex containing 1 [Source:HGNC Symbol;Acc:17565]                       | chr17 | 4736663   | 4801356   | 163         | 0.083    | 1        | 1         | 3.227E-03 | 9.093E-03 | PB-GT      |
| DNMT3A       | DNA methyltransferase 3, alpha [Source:HGNC Symbol;Acc:2978]                                                    | chr2  | 62455499  | 62465499  | 289         | 0.082    | 1        | 1         | 3.230E-03 | 9.100E-03 | PB-GT      |
| PTRG-AS1     | PTRG antisense RNA 1 [Source:HGNC Symbol;Acc:44638]                                                             | chr3  | 62247498  | 62355005  | 939         | 0.289    | 2        | 2         | 3.240E-03 | 9.108E-03 | PB-GT      |
| BVES-AS1     | BVES antisense RNA 1 [Source:HGNC Symbol;Acc:21223]                                                             | chr6  | 105584183 | 105617820 | 241         | 0.083    | 1        | 1         | 3.243E-03 | 9.108E-03 | PB-GT      |
| ZFX          | zinc finger protein, X-linked [Source:HGNC Symbol;Acc:12869]                                                    | chrX  | 24167290  | 24234372  | 497         | 0.083    | 1        | 1         | 3.245E-03 | 9.108E-03 | PB-GT      |
| C5orf56      | chromosome 5 open reading frame 56 [Source:HGNC Symbol;Acc:33838]                                               | chr5  | 13746328  | 138117336 | 308         | 0.083    | 1        | 1         | 3.250E-03 | 9.123E-03 | PB-GT      |
| MROH5        | maestro heat-like repeat family member 5 [Source:HGNC Symbol;Acc:42876]                                         | chr8  | 142443929 | 142517320 | 243         | 0.083    | 1        | 1         | 3.279E-03 | 9.186E-03 | PB-GT      |
| C10orf129    | chromosome 10 open reading frame 129 [Source:HGNC Symbol;Acc:31665]                                             | chr10 | 96953957  | 96988885  | 234         | 0.084    | 1        | 1         | 3.299E-03 | 9.232E-03 | PB-GT      |
| TMEM99       | transmembrane protein 99 [Source:HGNC Symbol;Acc:28355]                                                         | chr17 | 38975358  | 38992522  | 165         | 0.084    | 1        | 1         | 3.304E-03 | 9.238E-03 | PB-GT      |
| PSMD1        | prosome domain 1, 26S subunit, non-ATPase 1 [Source:HGNC Symbol;Acc:9554]                                       | chr12 | 23251578  | 23261754  | 1018        | 0.118    | 1        | 1         | 3.311E-03 | 9.253E-03 | PB-GT      |
| BCL2L13      | BCL2L13-like 3 (apoptosis facilitator) [Source:HGNC Symbol;Acc:17164]                                           | chr22 | 1811821   | 18213388  | 583         | 0.291    | 2        | 2         | 3.316E-03 | 9.252E-03 | PB-GT      |
| ERLEC1       | endoplasmic reticulum lectin 1 [Source:HGNC Symbol;Acc:25222]                                                   | chr2  | 54014181  | 54045956  | 294         | 0.084    | 1        | 1         | 3.342E-03 | 9.311E-03 | PB-GT      |
| SPR72        | signal recognition particle 72kDa [Source:HGNC Symbol;Acc:11303]                                                | chr4  | 57333081  | 57389399  | 297         | 0.084    | 1        | 1         | 3.343E-03 | 9.311E-03 | PB-GT      |
| CBF3         | oligomeric ribonucleoprotein fold containing 1 [Source:HGNC Symbol;Acc:26200]                                   | chr2  | 158465200 | 158465200 | 286         | 0.083    | 1        | 1         | 3.354E-03 | 9.322E-03 | PB-GT      |
| TCEB1        | transcription elongation factor B (SII), polypeptide 1 (15kDa, elongin C) [Source:HGNC Symbol;Acc:11617]        | chr8  | 74851404  | 74884522  | 246         | 0.084    | 1        | 1         | 3.358E-03 | 9.334E-03 | PB-GT      |
| MKS1         | McKusick-Kaufman syndrome [Source:HGNC Symbol;Acc:7108]                                                         | chr20 | 10385832  | 104014870 | 233         | 0.084    | 1        | 1         | 3.369E-03 | 9.337E-03 | PB-GT      |
| TJFP2        | tight junction protein 2 [Source:HGNC Symbol;Acc:1828]                                                          | chr9  | 17136224  | 171801724 | 784         | 0.294    | 2        | 2         | 3.405E-03 | 9.431E-03 | PB-GT      |
| FRPFP39      | FRPFP39 RNA repeat 39 homolog (S. cerevisiae) [Source:HGNC Symbol;Acc:20314]                                    | chr1  | 53711717  | 53753742  | 247         | 0.084    | 1        | 1         | 3.408E-03 | 9.431E-03 | PB-GT      |
| C3orf83      | chromosome 3 open reading frame 83 [Source:HGNC Symbol;Acc:40375]                                               | chr3  | 12566433  | 12602558  | 276         | 0.085    | 1        | 1         | 3.407E-03 | 9.431E-03 | PB-GT      |
| SART3        | squamous cell carcinoma antigen recognized by T cells 3 [Source:HGNC Symbol;Acc:16860]                          | chr12 | 108916357 | 108955176 | 222         | 0.085    | 1        | 1         | 3.414E-03 | 9.431E-03 | PB-GT      |
| RBM4         | RNA binding motif protein 4 [Source:HGNC Symbol;Acc:3901]                                                       | chr11 | 66394097  | 66434153  | 245         | 0.085    | 1        | 1         | 3.415E-03 | 9.431E-03 | PB-GT      |
| ELP2         | elongin A/hyaltransferase complex subunit 2 [Source:HGNC Symbol;Acc:18248]                                      | chr18 | 33709407  | 33709407  | 287         | 0.085    | 1        | 1         | 3.416E-03 | 9.431E-03 | PB-GT      |
| C3orf33      | chromosome 3 open reading frame 33 [Source:HGNC Symbol;Acc:26434]                                               | chr3  | 155484001 | 155524100 | 277         | 0.085    | 1        | 1         | 3.431E-03 | 9.462E-03 | PB-GT      |
| CRBN         | cereblin [Source:HGNC Symbol;Acc:30185]                                                                         | chr3  | 3190676   | 3221394   | 278         | 0.086    | 1        | 1         | 3.455E-03 | 9.520E-03 | PB-GT      |
| GAREM1       | GRB2 associated, regulator of MAPK1 [Source:HGNC Symbol;Acc:26136]                                              | chr18 | 29704840  | 30059447  | 2536        | 0.607    | 3        | 2         | 3.508E-03 | 9.626E-03 | PB-GT      |
| PRIM2        | primase, DNA, polypeptide 2 (85kDa) [Source:HGNC Symbol;Acc:17795]                                              | chr1  | 67179603  | 67251373  | 289         | 0.087    | 1        | 1         | 3.508E-03 | 9.626E-03 | PB-GT      |
| ADHFE1       | alcohol dehydrogenase, iron containing, 1 [Source:HGNC Symbol;Acc:16354]                                        | chr8  | 67342420  | 67383936  | 253         | 0.087    | 1        | 1         | 3.546E-03 | 9.744E-03 | PB-GT      |
| LEM3D        | LEM domain containing 3 [Source:HGNC Symbol;Acc:28887]                                                          | chr12 | 65563351  | 65642107  | 781         | 0.299    | 2        | 2         | 3.567E-03 | 9.791E-03 | PB-GT      |
| PMF22        | peripheral myelin protein 22 [Source:HGNC Symbol;Acc:31818]                                                     | chr17 | 15133095  | 15168843  | 172         | 0.087    | 1        |           |           |           |            |



table S2. Genes with significant transposon integrations in RKO BRAF<sup>WT</sup> cells after selection in low glucose medium

| Gene ID        | Description                                                                                                     | Chrom | Start     | End       | # TAA sites | Expected | Observed | Libraries | P         | FDR       | Transposon |
|----------------|-----------------------------------------------------------------------------------------------------------------|-------|-----------|-----------|-------------|----------|----------|-----------|-----------|-----------|------------|
| PHF20          | PHD finger protein 20 [Source:HGNC Symbol;Acc:16098]                                                            | chr20 | 34358986  | 34538303  | 890         | 0.322    | 2        | 2         | 4.397E-03 | 1.139E-02 | PB-GT      |
| RFN32          | RNF32 protein 32 [Source:HGNC Symbol;Acc:17158]                                                                 | chr1  | 15661975  | 15661975  | 281         | 0.097    | 1        | 1         | 4.404E-03 | 1.140E-02 | PB-GT      |
| ZNF833P        | zinc finger protein 833, pseudogene [Source:HGNC Symbol;Acc:33819]                                              | chr19 | 11750591  | 11797382  | 184         | 0.097    | 1        | 1         | 4.419E-03 | 1.143E-02 | PB-GT      |
| WTAP           | Wilms tumor 1 associated protein [Source:HGNC Symbol;Acc:16846]                                                 | chr6  | 160146617 | 16017351  | 283         | 0.097    | 1        | 1         | 4.430E-03 | 1.145E-02 | PB-GT      |
| RNF11          | ring finger protein 11 [Source:HGNC Symbol;Acc:10056]                                                           | chr1  | 51701943  | 51739127  | 274         | 0.097    | 1        | 1         | 4.435E-03 | 1.145E-02 | PB-GT      |
| BNIP2          | BCL2 adenovirus E1B 19kDa interacting protein 2 [Source:HGNC Symbol;Acc:10683]                                  | chr5  | 59951345  | 59991733  | 280         | 0.097    | 1        | 1         | 4.444E-03 | 1.146E-02 | PB-GT      |
| ABCE1          | ATP-binding cassette, sub-family E (ABC), member 1 [Source:HGNC Symbol;Acc:69]                                  | chr4  | 146019084 | 146050331 | 344         | 0.097    | 1        | 1         | 4.446E-03 | 1.146E-02 | PB-GT      |
| LITAF          | lipopolysaccharide-induced TNF factor [Source:HGNC Symbol;Acc:16841]                                            | chr16 | 11641853  | 11703237  | 291         | 0.097    | 1        | 1         | 4.454E-03 | 1.147E-02 | PB-GT      |
| SELP           | selectin P (granule membrane protein 140kDa, antigen CD62) [Source:HGNC Symbol;Acc:10721]                       | chr1  | 169558087 | 169599431 | 276         | 0.098    | 1        | 1         | 4.497E-03 | 1.157E-02 | PB-GT      |
| ZNF724P        | zinc finger protein 724, pseudogene [Source:HGNC Symbol;Acc:32460]                                              | chr19 | 23404401  | 23433192  | 186         | 0.098    | 1        | 1         | 4.513E-03 | 1.159E-02 | PB-GT      |
| SF3B3          | splitting factor 3b, subunit 3, 130kDa [Source:HGNC Symbol;Acc:10770]                                           | chr16 | 70557691  | 70608280  | 293         | 0.098    | 1        | 1         | 4.513E-03 | 1.159E-02 | PB-GT      |
| DIS3L2         | DIS3 mitotic control homolog (S. cerevisiae)-like 2 [Source:HGNC Symbol;Acc:28648]                              | chr2  | 232825955 | 233209060 | 2283        | 0.653    | 3        | 3         | 4.517E-03 | 1.159E-02 | PB-GT      |
| ANKRD36BP2     | ankyrin repeat domain 36B pseudogene 2 [Source:HGNC Symbol;Acc:33507]                                           | chr2  | 89065324  | 89106126  | 344         | 0.098    | 1        | 1         | 4.533E-03 | 1.161E-02 | PB-GT      |
| PARP16         | poly (ADP-ribose) polymerase family, member 16 [Source:HGNC Symbol;Acc:28040]                                   | chr15 | 65520798  | 65520956  | 283         | 0.098    | 1        | 1         | 4.537E-03 | 1.161E-02 | PB-GT      |
| IFT122         | intraflagellar transport 122 homolog (Chlamydomonas) [Source:HGNC Symbol;Acc:13566]                             | chr3  | 129158968 | 129239198 | 320         | 0.098    | 1        | 1         | 4.539E-03 | 1.161E-02 | PB-GT      |
| KCTD9          | potassium channel tetramerisation domain containing 9 [Source:HGNC Symbol;Acc:22401]                            | chr8  | 25285366  | 25315992  | 288         | 0.099    | 1        | 1         | 4.559E-03 | 1.165E-02 | PB-GT      |
| MMD            | monocyte to macrophage differentiation-associated [Source:HGNC Symbol;Acc:7153]                                 | chr17 | 53469974  | 53499353  | 195         | 0.099    | 1        | 1         | 4.569E-03 | 1.167E-02 | PB-GT      |
| APC            | adenomatous polyposis coli 1 [Source:HGNC Symbol;Acc:583]                                                       | chr5  | 112043195 | 112181936 | 1214        | 0.327    | 2        | 2         | 4.576E-03 | 1.168E-02 | PB-GT      |
| CDK8           | cyclin-dependent kinase 8 [Source:HGNC Symbol;Acc:1779]                                                         | chr13 | 26828276  | 26979375  | 1349        | 0.328    | 2        | 2         | 4.590E-03 | 1.170E-02 | PB-GT      |
| PARD6G         | par-6 partitioning defective 6 homolog (C. elegans) [Source:HGNC Symbol;Acc:16076]                              | chr18 | 77915115  | 78005249  | 415         | 0.099    | 1        | 1         | 4.624E-03 | 1.178E-02 | PB-GT      |
| MTF1           | mitochondrial translation optimization 1 homolog (S. cerevisiae) [Source:HGNC Symbol;Acc:19261]                 | chr6  | 74717301  | 74218959  | 290         | 0.100    | 1        | 1         | 4.644E-03 | 1.181E-02 | PB-GT      |
| SDAD1          | SDA1 domain containing 21 [Source:HGNC Symbol;Acc:25537]                                                        | chr4  | 7681215   | 7691215   | 352         | 0.100    | 1        | 1         | 4.648E-03 | 1.181E-02 | PB-GT      |
| COBP2          | coatomer protein complex, subunit beta 2 (beta prime) [Source:HGNC Symbol;Acc:2232]                             | chr3  | 139074442 | 139108574 | 324         | 0.100    | 1        | 1         | 4.649E-03 | 1.181E-02 | PB-GT      |
| PP1L6          | peptidylprolyl isomerase (cyclophilin)-like 6 [Source:HGNC Symbol;Acc:21557]                                    | chr6  | 109711419 | 10972374  | 291         | 0.100    | 1        | 1         | 4.675E-03 | 1.186E-02 | PB-GT      |
| NKIRAS1        | NFKB inhibitor interacting Ras-like 1 [Source:HGNC Symbol;Acc:17899]                                            | chr3  | 23933151  | 23988062  | 325         | 0.100    | 1        | 1         | 4.677E-03 | 1.186E-02 | PB-GT      |
| LYST           | lysosomal trafficking regulator [Source:HGNC Symbol;Acc:1968]                                                   | chr1  | 23582841  | 23582841  | 18662       | 0.661    | 3        | 3         | 4.716E-03 | 1.193E-02 | PB-GT      |
| SKIL           | SK-like oncogene [Source:HGNC Symbol;Acc:1087]                                                                  | chr3  | 170075466 | 170114623 | 327         | 0.101    | 1        | 1         | 4.733E-03 | 1.197E-02 | PB-GT      |
| PCF11          | PCF11, cleavage and polyadenylation factor subunit, homolog (S. cerevisiae) [Source:HGNC Symbol;Acc:30097]      | chr11 | 82868030  | 82898493  | 290         | 0.101    | 1        | 1         | 4.736E-03 | 1.197E-02 | PB-GT      |
| MYH15          | myosin, heavy chain 15 [Source:HGNC Symbol;Acc:31073]                                                           | chr3  | 108099216 | 108248169 | 1077        | 0.331    | 2        | 2         | 4.737E-03 | 1.197E-02 | PB-GT      |
| FBXW2          | F-box and WD repeat domain containing 2 [Source:HGNC Symbol;Acc:13608]                                          | chr9  | 123514256 | 123556900 | 269         | 0.101    | 1        | 1         | 4.761E-03 | 1.202E-02 | PB-GT      |
| ZNF727         | zinc finger protein 727 [Source:HGNC Symbol;Acc:2278]                                                           | chr7  | 63959821  | 63959821  | 272         | 0.101    | 1        | 1         | 4.770E-03 | 1.203E-02 | PB-GT      |
| TRAPPC13       | trafficking protein particle complex 13 [Source:HGNC Symbol;Acc:25828]                                          | chr9  | 64920543  | 64962060  | 375         | 0.101    | 1        | 1         | 4.775E-03 | 1.203E-02 | PB-GT      |
| MED1           | mediator complex subunit 1 [Source:HGNC Symbol;Acc:9234]                                                        | chr17 | 37560538  | 37607539  | 200         | 0.101    | 1        | 1         | 4.798E-03 | 1.208E-02 | PB-GT      |
| ACBD6          | acyl-CoA binding domain containing 6 [Source:HGNC Symbol;Acc:23339]                                             | chr1  | 180244515 | 180472089 | 1872        | 0.665    | 3        | 2         | 4.805E-03 | 1.208E-02 | PB-GT      |
| MTRF1          | mitochondrial ribosomal protein 1 [Source:HGNC Symbol;Acc:29510]                                                | chr8  | 66556969  | 66983496  | 972         | 0.333    | 2        | 2         | 4.805E-03 | 1.208E-02 | PB-GT      |
| DSP            | desmoplakin [Source:HGNC Symbol;Acc:3052]                                                                       | chr6  | 7541808   | 7566950   | 296         | 0.102    | 1        | 1         | 4.832E-03 | 1.213E-02 | PB-GT      |
| SMCS           | structural maintenance of chromosomes 5 [Source:HGNC Symbol;Acc:20465]                                          | chr9  | 72873937  | 72969804  | 890         | 0.334    | 2        | 2         | 4.837E-03 | 1.213E-02 | PB-GT      |
| DAGLB          | diacylglycerol lipase, beta [Source:HGNC Symbol;Acc:29923]                                                      | chr7  | 6448757   | 6523821   | 274         | 0.102    | 1        | 1         | 4.838E-03 | 1.213E-02 | PB-GT      |
| ACTN1          | actin, alpha 1 [Source:HGNC Symbol;Acc:153]                                                                     | chr7  | 69340860  | 69341527  | 376         | 0.103    | 1        | 1         | 4.879E-03 | 1.219E-02 | PB-GT      |
| HPS5           | Hermansky-Pudlak syndrome 5 [Source:HGNC Symbol;Acc:17022]                                                      | chr14 | 118300223 | 11834375  | 294         | 0.102    | 1        | 1         | 4.863E-03 | 1.217E-02 | PB-GT      |
| SRRPB          | signal recognition particle receptor, B subunit [Source:HGNC Symbol;Acc:24085]                                  | chr3  | 133502877 | 133544616 | 332         | 0.102    | 1        | 1         | 4.873E-03 | 1.219E-02 | PB-GT      |
| LRPBP1         | low density lipoprotein receptor binding protein 1 [Source:HGNC Symbol;Acc:9841]                                | chr18 | 9475007   | 95381114  | 427         | 0.102    | 1        | 1         | 4.886E-03 | 1.221E-02 | PB-GT      |
| LRP9           | low density lipoprotein receptor-related protein 9 [Source:HGNC Symbol;Acc:6697]                                | chr9  | 68921077  | 68921077  | 295         | 0.103    | 1        | 1         | 4.895E-03 | 1.221E-02 | PB-GT      |
| LMB1           | lamin B1 [Source:HGNC Symbol;Acc:6637]                                                                          | chr5  | 126112315 | 126172712 | 380         | 0.102    | 1        | 1         | 4.899E-03 | 1.221E-02 | PB-GT      |
| FAF2           | FA associated factor family member 2 [Source:HGNC Symbol;Acc:24666]                                             | chr5  | 175874629 | 175937075 | 380         | 0.102    | 1        | 1         | 4.899E-03 | 1.221E-02 | PB-GT      |
| SEC11A         | SEC11 homolog A (S. cerevisiae) [Source:HGNC Symbol;Acc:17718]                                                  | chr15 | 85212775  | 85259947  | 295         | 0.103    | 1        | 1         | 4.916E-03 | 1.224E-02 | PB-GT      |
| MLL5           | MLL5, histone H3K4 methyltransferase (Drosophila) [Source:HGNC Symbol;Acc:18541]                                | chr10 | 104854826 | 104875486 | 908         | 0.333    | 2        | 2         | 4.927E-03 | 1.224E-02 | PB-GT      |
| SCOPDH         | saccharopine dehydrogenase (putative) [Source:HGNC Symbol;Acc:24275]                                            | chr1  | 246887349 | 246931439 | 292         | 0.104    | 1        | 1         | 5.015E-03 | 1.246E-02 | PB-GT      |
| FERM1T         | fermitin family member 1 [Source:HGNC Symbol;Acc:15889]                                                         | chr20 | 6055492   | 6104191   | 287         | 0.104    | 1        | 1         | 5.046E-03 | 1.253E-02 | PB-GT      |
| ASGR1L1        | asparaginase like 1 [Source:HGNC Symbol;Acc:16448]                                                              | chr11 | 62104920  | 62169882  | 300         | 0.104    | 1        | 1         | 5.057E-03 | 1.255E-02 | PB-GT      |
| MET            | met proto-oncogene (hepatocyte growth factor receptor) [Source:HGNC Symbol;Acc:7029]                            | chr7  | 116312444 | 116343440 | 412         | 0.144    | 2        | 2         | 5.078E-03 | 1.259E-02 | PB-GT      |
| PLXNC1         | plexin C1 [Source:HGNC Symbol;Acc:9106]                                                                         | chr12 | 94524499  | 94701451  | 689         | 0.340    | 2        | 2         | 5.102E-03 | 1.264E-02 | PB-GT      |
| NPC1           | Niemann-Pick disease, type C1 [Source:HGNC Symbol;Acc:7897]                                                     | chr18 | 21166802  | 21166802  | 437         | 0.105    | 1        | 1         | 5.110E-03 | 1.264E-02 | PB-GT      |
| RGHY1          | ring finger and CHY zinc finger domain containing 1, E3 ubiquitin protein ligase [Source:HGNC Symbol;Acc:17479] | chr4  | 76424247  | 76438974  | 371         | 0.105    | 1        | 1         | 5.143E-03 | 1.272E-02 | PB-GT      |
| ARL6           | adenosine nucleotide recycling factor 6 [Source:HGNC Symbol;Acc:15210]                                          | chr9  | 67483365  | 67483365  | 343         | 0.105    | 1        | 1         | 5.190E-03 | 1.281E-02 | PB-GT      |
| ZNF461         | zinc finger protein 461 [Source:HGNC Symbol;Acc:21629]                                                          | chr19 | 37152804  | 37157755  | 200         | 0.106    | 1        | 1         | 5.192E-03 | 1.281E-02 | PB-GT      |
| SETDB2         | SET domain, bifurcated 2 [Source:HGNC Symbol;Acc:20263]                                                         | chr13 | 50018429  | 50069138  | 435         | 0.106    | 1        | 1         | 5.199E-03 | 1.282E-02 | PB-GT      |
| ACBD3          | acyl-CoA binding domain containing 3 [Source:HGNC Symbol;Acc:15453]                                             | chr1  | 226332380 | 226374431 | 298         | 0.106    | 1        | 1         | 5.216E-03 | 1.283E-02 | PB-GT      |
| MYB            | viral oncogene homolog [Source:HGNC Symbol;Acc:7545]                                                            | chr1  | 135922453 | 135922453 | 292         | 0.106    | 1        | 1         | 5.217E-03 | 1.283E-02 | PB-GT      |
| TMEM189        | transmembrane protein 189 [Source:HGNC Symbol;Acc:16735]                                                        | chr20 | 48697663  | 48770335  | 292         | 0.106    | 1        | 1         | 5.218E-03 | 1.283E-02 | PB-GT      |
| GMD5           | GDP-mannose 4,6-dehydratase [Source:HGNC Symbol;Acc:4369]                                                       | chr6  | 1624041   | 2245926   | 4517        | 1.552    | 5        | 2         | 5.230E-03 | 1.285E-02 | PB-GT      |
| SNX8           | sorting nexin 8 [Source:HGNC Symbol;Acc:14970]                                                                  | chr14 | 35030300  | 35099389  | 391         | 0.106    | 1        | 1         | 5.240E-03 | 1.285E-02 | PB-GT      |
| METTL21A       | methyltransferase like 21A [Source:HGNC Symbol;Acc:30476]                                                       | chr2  | 209445256 | 209445256 | 371         | 0.107    | 1        | 1         | 5.252E-03 | 1.285E-02 | PB-GT      |
| NEK4           | NIMA-related kinase 4 [Source:HGNC Symbol;Acc:11399]                                                            | chr3  | 52744800  | 52804965  | 345         | 0.106    | 1        | 1         | 5.249E-03 | 1.285E-02 | PB-GT      |
| TMEM189-UBE2V1 | TMEM189-UBE2V1 readthrough [Source:HGNC Symbol;Acc:33521]                                                       | chr20 | 48967661  | 48770174  | 293         | 0.106    | 1        | 1         | 5.222E-03 | 1.285E-02 | PB-GT      |
| ADNP           | activity-dependent neuroprotector homeobox [Source:HGNC Symbol;Acc:15766]                                       | chr20 | 49505453  | 49457958  | 293         | 0.106    | 1        | 1         | 5.252E-03 | 1.285E-02 | PB-GT      |
| FAM82A1        | family with sequence similarity 92, member A1 [Source:HGNC Symbol;Acc:30452]                                    | chr5  | 94710789  | 94710789  | 310         | 0.106    | 1        | 1         | 5.255E-03 | 1.285E-02 | PB-GT      |
| MID2           | midline 2 [Source:HGNC Symbol;Acc:7096]                                                                         | chrX  | 107096895 | 107170423 | 641         | 0.107    | 1        | 1         | 5.313E-03 | 1.298E-02 | PB-GT      |
| MSL2           | male-specific lethal 2 homolog (Drosophila) [Source:HGNC Symbol;Acc:25544]                                      | chr3  | 135887764 | 135916083 | 348         | 0.107    | 1        | 1         | 5.337E-03 | 1.300E-02 | PB-GT      |
| SLC35E3        | solute carrier family 35, member E3 [Source:HGNC Symbol;Acc:20864]                                              | chr12 | 69139896  | 69187744  | 280         | 0.107    | 1        | 1         | 5.351E-03 | 1.300E-02 | PB-GT      |
| AASD1          | aminoadipate-semialdehyde dehydrogenase [Source:HGNC Symbol;Acc:23993]                                          | chr4  | 57244666  | 57244666  | 310         | 0.107    | 1        | 1         | 5.381E-03 | 1.302E-02 | PB-GT      |
| KIAA0922       | KIAA0922 [Source:HGNC Symbol;Acc:29146]                                                                         | chr4  | 154387498 | 154557863 | 1226        | 0.347    | 2        | 2         | 5.585E-03 | 1.309E-02 | PB-GT      |
| LONR1          | LOXN1 N-terminal domain and ring finger [Source:HGNC Symbol;Acc:28302]                                          | chr8  | 126139403 | 12613382  | 314         | 0.108    | 1        | 1         | 5.388E-03 | 1.309E-02 | PB-GT      |
| HERC5          | HECT and RLD domain containing E3 ubiquitin protein ligase 5 [Source:HGNC Symbol;Acc:24368]                     | chr4  | 89378268  | 89427314  | 380         | 0.108    | 1        | 1         | 5.389E-03 | 1.309E-02 | PB-GT      |
| CEACAM21       | carcinoembryonic antigen cell adhesion molecule 21 [Source:HGNC Symbol;Acc:28834]                               | chr10 | 42055886  | 42055886  | 304         | 0.108    | 1        | 1         | 5.394E-03 | 1.309E-02 | PB-GT      |
| APAS1          | adaptor-related protein complex 4, sigma 1 subunit [Source:HGNC Symbol;Acc:575]                                 | chr14 | 31494312  | 31562188  | 397         | 0.108    | 1        | 1         | 5.397E-03 | 1.309E-02 | PB-GT      |
| ACTN4          | actinin, alpha 4 [Source:HGNC Symbol;Acc:166]                                                                   | chr19 | 39138289  | 39222223  | 205         | 0.108    | 1        | 1         | 5.445E-03 | 1.320E-02 | PB-GT      |
| TSGA10         | testis specific 10 [Source:HGNC Symbol;Acc:14927]                                                               | chr2  | 99613724  | 99771427  | 1219        | 0.349    | 2        | 2         | 5.449E-03 | 1.320E-02 | PB-GT      |
| KTN1           |                                                                                                                 |       |           |           |             |          |          |           |           |           |            |

**table S2. Genes with significant transposon integrations in RKO BRAF<sup>WT</sup> cells after selection in low glucose medium**

| Gene ID   | Description                                                                                                                          | Chrom | Start     | End       | # TTAAs sites | Expected | Observed | Libraries | P         | FDR       | Transposon |
|-----------|--------------------------------------------------------------------------------------------------------------------------------------|-------|-----------|-----------|---------------|----------|----------|-----------|-----------|-----------|------------|
| GTF2H1    | general transcription factor IIH, polypeptide 1, 62kDa [Source:HGNC Symbol;Acc:4655]                                                 | chr11 | 18343842  | 18388591  | 331           | 0.115    | 1        | 1         | 6.112E-03 | 1.408E-02 | PB-GT      |
| FHL2      | four and a half LIM domains 2 [Source:HGNC Symbol;Acc:3703]                                                                          | chr3  | 105274169 | 10529580  | 402           | 0.115    | 1        | 1         | 6.132E-03 | 1.408E-02 | PB-GT      |
| IQQG      | IQ motif containing G [Source:HGNC Symbol;Acc:25251]                                                                                 | chr3  | 197815946 | 197867013 | 374           | 0.115    | 1        | 1         | 6.132E-03 | 1.408E-02 | PB-GT      |
| FYCO1     | FYVE and coiled-coil domain containing 1 [Source:HGNC Symbol;Acc:14673]                                                              | chr3  | 45959396  | 46037316  | 374           | 0.115    | 1        | 1         | 6.132E-03 | 1.408E-02 | PB-GT      |
| SPRED1    | sprouty-related, EVH1 domain containing 1 [Source:HGNC Symbol;Acc:20249]                                                             | chr15 | 38544527  | 38649450  | 1049          | 0.365    | 2        | 1         | 6.170E-03 | 1.414E-02 | PB-GT      |
| AGO2      | argonaute RISC catalytic component 2 [Source:HGNC Symbol;Acc:32263]                                                                  | chr6  | 141541264 | 141645718 | 337           | 0.115    | 1        | 1         | 6.174E-03 | 1.414E-02 | PB-GT      |
| PHACTR2   | phosphatase and actin regulator 2 [Source:HGNC Symbol;Acc:20956]                                                                     | chr6  | 143857982 | 144152322 | 2080          | 0.714    | 3        | 2         | 6.175E-03 | 1.414E-02 | PB-GT      |
| DBF4      | DBF4 homolog (S. cerevisiae) [Source:HGNC Symbol;Acc:17364]                                                                          | chr7  | 87505531  | 87538856  | 311           | 0.115    | 1        | 1         | 6.177E-03 | 1.414E-02 | PB-GT      |
| HS2ST1    | heparan sulfate 2-O-sulfotransferase 1 [Source:HGNC Symbol;Acc:5193]                                                                 | chr1  | 87380331  | 87620334  | 2013          | 0.715    | 3        | 2         | 6.178E-03 | 1.414E-02 | PB-GT      |
| SMEK1     | SMEK homolog 1, suppressor of miR1 [Drosophila] [Source:HGNC Symbol;Acc:20219]                                                       | chr15 | 91923955  | 91973698  | 426           | 0.116    | 1        | 1         | 6.182E-03 | 1.414E-02 | PB-GT      |
| GF2M      | G elongation factor, mitochondrial 2 [Source:HGNC Symbol;Acc:29682]                                                                  | chr5  | 74017029  | 74063136  | 429           | 0.116    | 1        | 1         | 6.190E-03 | 1.414E-02 | PB-GT      |
| ATR       | ataxia telangiectasia and Rad3 related [Source:HGNC Symbol;Acc:882]                                                                  | chr3  | 142180777 | 142297668 | 1189          | 0.366    | 2        | 1         | 6.215E-03 | 1.419E-02 | PB-GT      |
| ZFP14     | ZFP14 zinc finger protein [Source:HGNC Symbol;Acc:29312]                                                                             | chr19 | 36827162  | 36870101  | 220           | 0.116    | 1        | 1         | 6.239E-03 | 1.423E-02 | PB-GT      |
| BBS4      | Bardet-Biedl syndrome 4 [Source:HGNC Symbol;Acc:969]                                                                                 | chr1  | 67959118  | 67990181  | 344           | 0.116    | 1        | 1         | 6.423E-03 | 1.454E-02 | PB-GT      |
| CPT1A     | carnitine palmitoyltransferase 1A (liver) [Source:HGNC Symbol;Acc:2328]                                                              | chr11 | 68522088  | 68611878  | 335           | 0.116    | 1        | 1         | 6.255E-03 | 1.425E-02 | PB-GT      |
| SEMA3D    | sema domain, immunoglobulin domain (Ig), short basic domain, secreted, (semaphorin) 3D [Source:HGNC Symbol;Acc:10726]                | chr7  | 84624869  | 84816711  | 1933          | 0.718    | 3        | 2         | 6.274E-03 | 1.428E-02 | PB-GT      |
| SMYD4     | SET and MYND domain containing 4 [Source:HGNC Symbol;Acc:21067]                                                                      | chr17 | 16627729  | 1733928   | 230           | 0.117    | 1        | 1         | 6.282E-03 | 1.429E-02 | PB-GT      |
| DNAJ16    | DnaJ (Hsp40) homolog, subfamily C, member 16 [Source:HGNC Symbol;Acc:29157]                                                          | chr15 | 20959110  | 20991922  | 222           | 0.117    | 1        | 1         | 6.348E-03 | 1.440E-02 | PB-GT      |
| ZNF64     | zinc finger protein 66 [Source:HGNC Symbol;Acc:13135]                                                                                | chr19 | 20599110  | 20991922  | 222           | 0.117    | 1        | 1         | 6.348E-03 | 1.440E-02 | PB-GT      |
| CLEC2D    | C-type lectin domain family 2, member D [Source:HGNC Symbol;Acc:14351]                                                               | chr12 | 9809270   | 9848413   | 306           | 0.117    | 1        | 1         | 6.350E-03 | 1.440E-02 | PB-GT      |
| ESCO2     | establishment of cohesion 1 homolog 2 (S. cerevisiae) [Source:HGNC Symbol;Acc:27230]                                                 | chr8  | 27629466  | 27670157  | 342           | 0.117    | 1        | 1         | 6.351E-03 | 1.440E-02 | PB-GT      |
| CCP5B     | CCP5 proteinase domain 5 [Source:HGNC Symbol;Acc:62249]                                                                              | chr6  | 67935114  | 6825338   | 344           | 0.118    | 1        | 1         | 6.423E-03 | 1.454E-02 | PB-GT      |
| GN5B      | guanine nucleotide binding protein (G protein), beta 5 [Source:HGNC Symbol;Acc:4401]                                                 | chr15 | 52413117  | 52483566  | 339           | 0.118    | 1        | 1         | 6.427E-03 | 1.454E-02 | PB-GT      |
| BMX       | BMX non-receptor tyrosine kinase [Source:HGNC Symbol;Acc:1079]                                                                       | chrX  | 15482369  | 15574625  | 708           | 0.118    | 1        | 1         | 6.434E-03 | 1.455E-02 | PB-GT      |
| CDC68A    | coiled-coil domain containing 88A [Source:HGNC Symbol;Acc:25232]                                                                     | chr2  | 55514978  | 55647057  | 1297          | 0.371    | 2        | 1         | 6.458E-03 | 1.459E-02 | PB-GT      |
| LATS2     | LATS2 serine/threonine kinase 2 [Source:HGNC Symbol;Acc:25232]                                                                       | chr2  | 55471171  | 55487113  | 468           | 0.119    | 1        | 1         | 6.488E-03 | 1.464E-02 | PB-GT      |
| C6orf89   | chromosome 6 open reading frame 89 [Source:HGNC Symbol;Acc:21114]                                                                    | chr6  | 36839646  | 36892331  | 345           | 0.119    | 1        | 1         | 6.491E-03 | 1.464E-02 | PB-GT      |
| GTF2A1    | general transcription factor IIA, 1, 1937kDa [Source:HGNC Symbol;Acc:4646]                                                           | chr14 | 81641796  | 81687721  | 437           | 0.119    | 1        | 1         | 6.492E-03 | 1.464E-02 | PB-GT      |
| OCLN      | occludin [Source:HGNC Symbol;Acc:8104]                                                                                               | chr5  | 6878119   | 68853931  | 441           | 0.119    | 1        | 1         | 6.527E-03 | 1.470E-02 | PB-GT      |
| SMARCC1   | SMN1/SMN2 related, matrix associated, ataxia associated regulator of chromatin, subfamily c, member 1 [Source:HGNC Symbol;Acc:28077] | chr3  | 47628762  | 47823598  | 1211          | 0.373    | 2        | 2         | 6.533E-03 | 1.471E-02 | PB-GT      |
| DS3C      | desmin-coiled-coil 3 [Source:HGNC Symbol;Acc:3037]                                                                                   | chr4  | 28929791  | 28971729  | 459           | 0.119    | 1        | 1         | 6.533E-03 | 1.471E-02 | PB-GT      |
| MARCH3    | membrane-associated ring finger (CHCH) 3, E3 ubiquitin protein ligase [Source:HGNC Symbol;Acc:28077]                                 | chr4  | 164445450 | 165305202 | 757           | 0.246    | 6        | 2         | 6.560E-03 | 1.473E-02 | PB-GT      |
| SGK3      | serum/glucocorticoid induced kinase family, member 3 [Source:HGNC Symbol;Acc:10812]                                                  | chr8  | 67624653  | 67744257  | 1089          | 0.373    | 2        | 1         | 6.560E-03 | 1.473E-02 | PB-GT      |
| NUP62L    | nucleoporin 62kDa C-terminal like [Source:HGNC Symbol;Acc:25950]                                                                     | chrX  | 106386657 | 106734670 | 716           | 0.119    | 1        | 1         | 6.574E-03 | 1.475E-02 | PB-GT      |
| SLC34A4   | solute carrier family 3, subfamily A (NHEA, cation proton antiporter 4), member 4 [Source:HGNC Symbol;Acc:11077]                     | chr13 | 103393162 | 103515431 | 419           | 0.119    | 1        | 1         | 6.630E-03 | 1.483E-02 | PB-GT      |
| SOCS7     | suppressor of cytokine signaling 7 [Source:HGNC Symbol;Acc:29846]                                                                    | chr17 | 36508111  | 36556019  | 237           | 0.120    | 1        | 1         | 6.655E-03 | 1.491E-02 | PB-GT      |
| ATL3      | ataxin 3 [Source:HGNC Symbol;Acc:24526]                                                                                              | chr11 | 63391559  | 63436933  | 347           | 0.120    | 1        | 1         | 6.693E-03 | 1.498E-02 | PB-GT      |
| ENTPD7    | ectonucleoside triphosphate diphosphohydrolase 7 [Source:HGNC Symbol;Acc:19745]                                                      | chr10 | 101419263 | 101465997 | 336           | 0.121    | 1        | 1         | 6.716E-03 | 1.502E-02 | PB-GT      |
| DLGAP1    | disc large (Drosophila) homolog-associated protein 1 [Source:HGNC Symbol;Acc:2305]                                                   | chr3  | 34969329  | 34998379  | 6836          | 0.537    | 5        | 2         | 6.724E-03 | 1.502E-02 | PB-GT      |
| RAD18     | RAD18 homolog (S. cerevisiae) [Source:HGNC Symbol;Acc:18278]                                                                         | chr3  | 8817088   | 9005457   | 1224          | 0.377    | 2        | 2         | 6.726E-03 | 1.502E-02 | PB-GT      |
| CHUK      | conserved helix-loop-helix ubiquitous kinase [Source:HGNC Symbol;Acc:1974]                                                           | chr10 | 101984605 | 101984676 | 339           | 0.121    | 1        | 1         | 6.754E-03 | 1.507E-02 | PB-GT      |
| HELB      | helicase (DNA) B [Source:HGNC Symbol;Acc:17198]                                                                                      | chr12 | 66969325  | 67374237  | 317           | 0.121    | 1        | 1         | 6.759E-03 | 1.515E-02 | PB-GT      |
| C7orf81   | cytochrome P450 open reading frame 31 [Source:HGNC Symbol;Acc:21722]                                                                 | chr7  | 25174316  | 25219875  | 327           | 0.121    | 1        | 1         | 6.805E-03 | 1.519E-02 | PB-GT      |
| PSMD11    | proteasome (prosome, macropain) 26S subunit, non-ATPase, 11 [Source:HGNC Symbol;Acc:9556]                                            | chr17 | 30717179  | 30810336  | 240           | 0.122    | 1        | 1         | 6.817E-03 | 1.517E-02 | PB-GT      |
| ZNRD1-AS1 | ZNRD1 antisense RNA 1 [Source:HGNC Symbol;Acc:13924]                                                                                 | chr6  | 29968788  | 30029417  | 354           | 0.122    | 1        | 1         | 6.820E-03 | 1.517E-02 | PB-GT      |
| ANKS1A    | ankyrin repeat and sterile alpha motif domain containing 1A [Source:HGNC Symbol;Acc:20961]                                           | chr6  | 34857042  | 35059179  | 1102          | 0.379    | 2        | 1         | 6.825E-03 | 1.517E-02 | PB-GT      |
| MM2ME1    | meiosis-specific E3 ubiquitin protein ligase [Source:HGNC Symbol;Acc:8673]                                                           | chr18 | 69231956  | 69293424  | 318           | 0.122    | 1        | 1         | 6.837E-03 | 1.519E-02 | PB-GT      |
| YAE1D1    | Yae1 domain containing 1 [Source:HGNC Symbol;Acc:24857]                                                                              | chr7  | 39605975  | 39649919  | 328           | 0.122    | 1        | 1         | 6.842E-03 | 1.518E-02 | PB-GT      |
| HOOK2     | hook homolog 2 (Drosophila) [Source:HGNC Symbol;Acc:19885]                                                                           | chr19 | 12873817  | 12893554  | 231           | 0.122    | 1        | 1         | 6.852E-03 | 1.520E-02 | PB-GT      |
| PDCD4     | programmed cell death 4 (neoplastic transformation inhibitor) [Source:HGNC Symbol;Acc:8763]                                          | chr10 | 112631565 | 112659764 | 242           | 0.122    | 1        | 1         | 6.870E-03 | 1.524E-02 | PB-GT      |
| LPO       | lipocalin [Source:HGNC Symbol;Acc:8876]                                                                                              | chr10 | 86295929  | 86345870  | 342           | 0.122    | 1        | 1         | 6.892E-03 | 1.534E-02 | PB-GT      |
| IL20RB    | interleukin 20 receptor beta [Source:HGNC Symbol;Acc:6004]                                                                           | chr3  | 136665072 | 136729927 | 399           | 0.123    | 1        | 1         | 6.944E-03 | 1.536E-02 | PB-GT      |
| SUPT20H   | suppressor of Ty 20 homolog (S. cerevisiae) [Source:HGNC Symbol;Acc:20596]                                                           | chr13 | 37583449  | 37633850  | 506           | 0.123    | 1        | 1         | 6.956E-03 | 1.538E-02 | PB-GT      |
| HGSNAT    | heparan-alpha-glucosaminidase N-acetyltransferase [Source:HGNC Symbol;Acc:26527]                                                     | chr8  | 42995556  | 43057988  | 359           | 0.123    | 1        | 1         | 6.971E-03 | 1.540E-02 | PB-GT      |
| FAM172A   | family with sequence similarity 172, member A [Source:HGNC Symbol;Acc:24285]                                                         | chr5  | 92638715  | 92691475  | 439           | 0.123    | 1        | 1         | 7.040E-03 | 1.549E-02 | PB-GT      |
| COL3A1    | collagen, type III, alpha 1 [Source:HGNC Symbol;Acc:22011]                                                                           | chr2  | 169839046 | 169877472 | 432           | 0.124    | 1        | 1         | 7.031E-03 | 1.551E-02 | PB-GT      |
| PTBP3     | polypyridin tract binding protein 3 [Source:HGNC Symbol;Acc:10253]                                                                   | chr9  | 114980715 | 115095947 | 1021          | 0.383    | 2        | 1         | 7.044E-03 | 1.552E-02 | PB-GT      |
| TBCA      | tubulin folding cofactor A [Source:HGNC Symbol;Acc:11579]                                                                            | chr5  | 76998991  | 77164604  | 1422          | 0.383    | 2        | 1         | 7.075E-03 | 1.554E-02 | PB-GT      |
| ADAM17    | ADAM-type metalloproteinase domain 17 [Source:HGNC Symbol;Acc:195]                                                                   | chr12 | 90268615  | 90369211  | 433           | 0.124    | 1        | 1         | 7.085E-03 | 1.556E-02 | PB-GT      |
| SMC04     | single-pass membrane protein with coiled-coil domains 4 [Source:HGNC Symbol;Acc:24810]                                               | chr11 | 93211638  | 93276674  | 357           | 0.124    | 1        | 1         | 7.088E-03 | 1.554E-02 | PB-GT      |
| TMEM14B   | transmembrane protein 14B [Source:HGNC Symbol;Acc:21384]                                                                             | chr6  | 10747992  | 10830366  | 1117          | 0.384    | 2        | 1         | 7.089E-03 | 1.556E-02 | PB-GT      |
| LINC00630 | long intergenic non-protein coding RNA 630 [Source:HGNC Symbol;Acc:44263]                                                            | chrX  | 102204209 | 102140334 | 745           | 0.124    | 1        | 1         | 7.095E-03 | 1.558E-02 | PB-GT      |
| RAB15     | RAB15 small GTPase [Source:HGNC Symbol;Acc:14244]                                                                                    | chr13 | 51483117  | 51484592  | 512           | 0.124    | 1        | 1         | 7.115E-03 | 1.560E-02 | PB-GT      |
| RNASEH2B  | ribonuclease H2, subunit B [Source:HGNC Symbol;Acc:25671]                                                                            | chr3  | 54552073  | 54603500  | 462           | 0.125    | 1        | 1         | 7.147E-03 | 1.563E-02 | PB-GT      |
| DHX29     | DEAH (Asp-Glu-Ala-His) box polypeptide 29 [Source:HGNC Symbol;Acc:15815]                                                             | chr10 | 126933694 | 126994422 | 349           | 0.125    | 1        | 1         | 7.172E-03 | 1.563E-02 | PB-GT      |
| FAM196A   | family with sequence similarity 196, member A [Source:HGNC Symbol;Acc:33859]                                                         | chr5  | 87490486  | 87509486  | 364           | 0.125    | 1        | 1         | 7.189E-03 | 1.566E-02 | PB-GT      |
| RMDN1     | RNA motif domain containing 1 [Source:HGNC Symbol;Acc:26475]                                                                         | chr12 | 56915713  | 56984745  | 326           | 0.125    | 1        | 1         | 7.170E-03 | 1.567E-02 | PB-GT      |
| RBM52     | RNA binding motif, single stranded interacting protein 2 [Source:HGNC Symbol;Acc:9909]                                               | chr7  | 112459202 | 112579971 | 1041          | 0.387    | 2        | 1         | 7.225E-03 | 1.577E-02 | PB-GT      |
| C7orf60   | chromosome 7 open reading frame 60 [Source:HGNC Symbol;Acc:26475]                                                                    | chr7  | 112459202 | 112579971 | 1041          | 0.387    | 2        | 1         | 7.225E-03 | 1.577E-02 | PB-GT      |
| CD46      | CD46 molecule, complement regulatory protein [Source:HGNC Symbol;Acc:6953]                                                           | chr1  | 207925402 | 207968858 | 353           | 0.125    | 1        | 1         | 7.225E-03 | 1.577E-02 | PB-GT      |
| TPRS311A  | transcription protein, serine/threonine kinase [Source:HGNC Symbol;Acc:27694]                                                        | chr8  | 88775103  | 88829856  | 344           | 0.125    | 1        | 1         | 7.249E-03 | 1.582E-02 | PB-GT      |
| WWP1      | WW domain containing E3 ubiquitin protein ligase 1 [Source:HGNC Symbol;Acc:17004]                                                    | chr8  | 87354967  | 87490649  | 1131          | 0.387    | 2        | 2         | 7.272E-03 | 1.584E-02 | PB-GT      |
| APBB2     | amyloid beta (A4) precursor protein binding, family B, member 2 [Source:HGNC Symbol;Acc:582]                                         | chr14 | 40812044  | 41218731  | 2649          | 0.750    | 3        | 1         | 7.292E-03 | 1.588E-02 | PB-GT      |
| ACTR6     | ARF6 actin-related protein 6 homolog (yeast) [Source:HGNC Symbol;Acc:24025]                                                          | chr12 | 100592900 | 100635643 | 329           | 0.126    | 1        | 1         | 7.297E-03 | 1.588E-02 | PB-GT      |
| MYO1B     | myosin IB [Source:HGNC Symbol;Acc:7598]                                                                                              | chr2  | 192110911 | 19231516  | 128           | 0.126    | 1        | 1         | 7.316E-03 | 1.592E-02 | PB-GT      |
| RUNX1     | runx-related transcription factor 1 [Source:HGNC Symbol;Acc:10471]                                                                   | chr21 | 36160098  | 37357047  | 7663          | 2.193    | 6        | 2         | 7.333E-03 | 1.593E-02 | PB-GT      |
| HERC6     | HECT and RLD domain containing E3 ubiquitin protein ligase family member 6 [Source:HGNC Symbol;Acc:26072]                            | chr4  | 89299891  | 89364263  | 447           | 0.127    | 1        | 1         | 7.364E-03 | 1.598E-02 | PB-GT      |
| SYNP2     | synaptopodin 2 [Source:HGNC Symbol;Acc:177                                                                                           |       |           |           |               |          |          |           |           |           |            |

table S2. Genes with significant transposon integrations in RKO BRAF<sup>WT</sup> cells after selection in low glucose medium

| Gene ID     | Description                                                                                               | Chrom | Start     | End       | # TTAAs sites | Expected | Observed | Libraries | P         | FDR       | Transposon |
|-------------|-----------------------------------------------------------------------------------------------------------|-------|-----------|-----------|---------------|----------|----------|-----------|-----------|-----------|------------|
| NCOA3       | nuclear receptor coactivator 3 [Source:HGNC Symbol;Acc:7670]                                              | chr20 | 46130601  | 46289621  | 1127          | 0.408    | 2        | 2         | 8.382E-03 | 1.737E-02 | PB-GT      |
| NCOA7       | nuclear receptor coactivator 7 [Source:HGNC Symbol;Acc:108137]                                            | chr9  | 128310207 | 12834939  | 1169          | 0.409    | 2        | 1         | 1.737E-02 | 1.737E-02 | PB-GT      |
| SAP130      | SIN3A-associated protein, 130kDa [Source:HGNC Symbol;Acc:20813]                                           | chr2  | 128069791 | 128755694 | 474           | 0.136    | 1        | 1         | 1.397E-03 | 1.738E-02 | PB-GT      |
| WHSC1       | Wolf-Hirschhorn syndrome candidate 1 [Source:HGNC Symbol;Acc:12766]                                       | chr4  | 1873151   | 1983934   | 479           | 0.136    | 1        | 1         | 8.406E-03 | 1.739E-02 | PB-GT      |
| GOLGA1      | golgin A1 [Source:HGNC Symbol;Acc:4424]                                                                   | chr9  | 127640646 | 127710371 | 362           | 0.136    | 1        | 1         | 8.425E-03 | 1.742E-02 | PB-GT      |
| EFH8        | EF-hand domain family, member B [Source:HGNC Symbol;Acc:26330]                                            | chr5  | 19520964  | 19585517  | 442           | 0.136    | 1        | 1         | 8.447E-03 | 1.742E-02 | PB-GT      |
| ALDH1L1     | aldehyde dehydrogenase 1 family, member L1 [Source:HGNC Symbol;Acc:3978]                                  | chr3  | 125822412 | 125918837 | 442           | 0.136    | 1        | 1         | 8.447E-03 | 1.742E-02 | PB-GT      |
| CCDC66      | coiled-coil domain containing 66 [Source:HGNC Symbol;Acc:27709]                                           | chr3  | 56591189  | 56655846  | 442           | 0.136    | 1        | 1         | 8.447E-03 | 1.742E-02 | PB-GT      |
| EVC         | Ellis van Creveld syndrome [Source:HGNC Symbol;Acc:3497]                                                  | chr4  | 5712924   | 5830772   | 481           | 0.136    | 1        | 1         | 8.473E-03 | 1.746E-02 | PB-GT      |
| STK17A      | serine/threonine kinase 17a [Source:HGNC Symbol;Acc:11395]                                                | chr4  | 673462    | 673945    | 358           | 0.137    | 1        | 1         | 8.494E-03 | 1.748E-02 | PB-GT      |
| UR11        | URF1, prefolin-like chaperone [Source:HGNC Symbol;Acc:13236]                                              | chr19 | 30414551  | 30506811  | 779           | 0.411    | 2        | 1         | 8.532E-03 | 1.756E-02 | PB-GT      |
| DNAJB14     | DnaJ (Hsp40) homolog, subfamily B, member 14 [Source:HGNC Symbol;Acc:25881]                               | chr4  | 100817405 | 100867883 | 483           | 0.137    | 1        | 1         | 8.540E-03 | 1.756E-02 | PB-GT      |
| TRIP12      | thyroid hormone receptor interactor 12 [Source:HGNC Symbol;Acc:12306]                                     | chr2  | 230628554 | 230787955 | 1440          | 0.412    | 2        | 2         | 8.574E-03 | 1.762E-02 | PB-GT      |
| NNJ2        | nitinurin 2 [Source:HGNC Symbol;Acc:7525]                                                                 | chr12 | 673462    | 673945    | 358           | 0.137    | 1        | 1         | 8.579E-03 | 1.762E-02 | PB-GT      |
| SLC44A3     | solute carrier family 44, member 3 [Source:HGNC Symbol;Acc:28689]                                         | chr1  | 95285898  | 95360802  | 387           | 0.137    | 1        | 1         | 8.615E-03 | 1.768E-02 | PB-GT      |
| CTNND1      | catenin (cadherin-associated protein), delta 1 [Source:HGNC Symbol;Acc:2515]                              | chr11 | 57520715  | 57587018  | 396           | 0.137    | 1        | 1         | 8.619E-03 | 1.768E-02 | PB-GT      |
| IL17RD      | interleukin 17 receptor D [Source:HGNC Symbol;Acc:17616]                                                  | chr3  | 67124010  | 67204334  | 447           | 0.138    | 1        | 1         | 8.630E-03 | 1.769E-02 | PB-GT      |
| NEL3        | nef endonuclease VIII-like 3 (E. coli) [Source:HGNC Symbol;Acc:24573]                                     | chr4  | 178230990 | 17828996  | 496           | 0.138    | 1        | 1         | 8.642E-03 | 1.770E-02 | PB-GT      |
| ITPKB       | inositol-trisphosphate 3-kinase B [Source:HGNC Symbol;Acc:6179]                                           | chr1  | 226819391 | 226927024 | 388           | 0.138    | 1        | 1         | 8.658E-03 | 1.771E-02 | PB-GT      |
| RHEB        | Ras homology enriched in brain [Source:HGNC Symbol;Acc:10011]                                             | chr7  | 151163098 | 151212066 | 371           | 0.138    | 1        | 1         | 8.662E-03 | 1.771E-02 | PB-GT      |
| SCUBE1      | signal peptide, CUB domain, EGF-like 1 [Source:HGNC Symbol;Acc:13441]                                     | chr22 | 43599229  | 43739394  | 276           | 0.138    | 1        | 1         | 8.677E-03 | 1.772E-02 | PB-GT      |
| ACER1       | alkaline ceramidase 1 [Source:HGNC Symbol;Acc:16096]                                                      | chr11 | 76571915  | 76577841  | 1192          | 0.414    | 2        | 1         | 8.677E-03 | 1.772E-02 | PB-GT      |
| BFS1P1      | beaded filament structural protein 1, filerlin [Source:HGNC Symbol;Acc:1040]                              | chr20 | 17474550  | 17549865  | 381           | 0.138    | 1        | 1         | 8.696E-03 | 1.774E-02 | PB-GT      |
| FAM114A1    | family with sequence similarity 114, member A1 [Source:HGNC Symbol;Acc:25087]                             | chr4  | 38869298  | 38947360  | 488           | 0.138    | 1        | 1         | 8.710E-03 | 1.776E-02 | PB-GT      |
| HEXB        | hexosaminidase B (beta polypeptide) [Source:HGNC Symbol;Acc:4879]                                         | chr5  | 73935848  | 74018472  | 513           | 0.138    | 1        | 1         | 8.720E-03 | 1.777E-02 | PB-GT      |
| PALM2-AKAP2 | PALM2-AKAP2 readthrough [Source:HGNC Symbol;Acc:16096]                                                    | chr9  | 112542589 | 112542589 | 1             | 0.791    | 3        | 2         | 8.741E-03 | 1.777E-02 | PB-GT      |
| AKAP2       | A kinase (PKA) anchor protein 2 [Source:HGNC Symbol;Acc:372]                                              | chr9  | 112542769 | 112534792 | 2108          | 0.791    | 3        | 2         | 8.741E-03 | 1.777E-02 | PB-GT      |
| SNX3        | sorting nexin 3 [Source:HGNC Symbol;Acc:11174]                                                            | chr6  | 108532426 | 108582464 | 403           | 0.138    | 1        | 1         | 8.742E-03 | 1.777E-02 | PB-GT      |
| FBXW4       | F-box and WD repeat domain containing 4 [Source:HGNC Symbol;Acc:10847]                                    | chr10 | 103370423 | 103455052 | 388           | 0.138    | 1        | 1         | 8.747E-03 | 1.777E-02 | PB-GT      |
| FAM113A     | family with sequence similarity 193, member A [Source:HGNC Symbol;Acc:16822]                              | chr4  | 26289988  | 2734292   | 490           | 0.139    | 1        | 1         | 8.778E-03 | 1.782E-02 | PB-GT      |
| CSNK1A1     | casein kinase 1, alpha 1 [Source:HGNC Symbol;Acc:2451]                                                    | chr4  | 148871760 | 148931007 | 515           | 0.139    | 1        | 1         | 8.783E-03 | 1.782E-02 | PB-GT      |
| PLAA        | phospholipase A2-activating protein [Source:HGNC Symbol;Acc:9043]                                         | chr9  | 26904081  | 26947461  | 371           | 0.139    | 1        | 1         | 8.829E-03 | 1.790E-02 | PB-GT      |
| FAM21A      | family with sequence similarity 21, member A [Source:HGNC Symbol;Acc:23416]                               | chr10 | 51827648  | 51893269  | 390           | 0.139    | 1        | 1         | 8.833E-03 | 1.790E-02 | PB-GT      |
| PTRH2       | peptidyl-RNA hydrolase 2 [Source:HGNC Symbol;Acc:24265]                                                   | chr17 | 57157997  | 57784987  | 275           | 0.139    | 1        | 1         | 8.847E-03 | 1.791E-02 | PB-GT      |
| VAMP4       | vesicle-associated membrane protein 4 [Source:HGNC Symbol;Acc:12045]                                      | chr1  | 171693900 | 171711387 | 393           | 0.140    | 1        | 1         | 8.872E-03 | 1.795E-02 | PB-GT      |
| RABL3       | RAB, member of RAS oncogene family-like 3 [Source:HGNC Symbol;Acc:18072]                                  | chr3  | 120405528 | 120461840 | 454           | 0.140    | 1        | 1         | 8.890E-03 | 1.797E-02 | PB-GT      |
| ANKRD50     | ankyrin repeat domain 50 [Source:HGNC Symbol;Acc:29232]                                                   | chr4  | 12588520  | 12663387  | 494           | 0.140    | 1        | 1         | 8.915E-03 | 1.800E-02 | PB-GT      |
| PDS5B       | PDS5, regulator of cohesion maintenance, homolog B (S. cerevisiae) [Source:HGNC Symbol;Acc:20418]         | chr13 | 31300564  | 33352157  | 1721          | 0.416    | 2        | 2         | 8.917E-03 | 1.800E-02 | PB-GT      |
| DECR1       | 2-acyl-CoA reductase 1, mitochondrial [Source:HGNC Symbol;Acc:2753]                                       | chr4  | 91841363  | 91841363  | 1             | 0.805    | 4        | 1         | 8.954E-03 | 1.805E-02 | PB-GT      |
| B3GALNT2    | beta-1,3-N-acetylgalactosaminyltransferase 2 [Source:HGNC Symbol;Acc:28596]                               | chr1  | 235613238 | 235667781 | 395           | 0.140    | 1        | 1         | 8.959E-03 | 1.805E-02 | PB-GT      |
| TPX2        | TPX2, microtubule-associated, homolog (Xenopus laevis) [Source:HGNC Symbol;Acc:1249]                      | chr20 | 30320704  | 30308968  | 387           | 0.140    | 1        | 1         | 8.959E-03 | 1.805E-02 | PB-GT      |
| CPX2        | cold shock domain containing E1, RNA-binding [Source:HGNC Symbol;Acc:29905]                               | chr1  | 115259534 | 115301297 | 397           | 0.141    | 1        | 1         | 9.045E-03 | 1.821E-02 | PB-GT      |
| DCP1A       | 5' cap decapping enzyme homolog G (S. cerevisiae) [Source:HGNC Symbol;Acc:18714]                          | chr5  | 53311437  | 53381437  | 459           | 0.141    | 1        | 1         | 9.078E-03 | 1.821E-02 | PB-GT      |
| GRHL2       | grainyhead-like 2 (Drosophila) [Source:HGNC Symbol;Acc:2799]                                              | chr3  | 102504660 | 102681954 | 1229          | 0.421    | 2        | 2         | 9.103E-03 | 1.830E-02 | PB-GT      |
| MAP4        | microtubule-associated protein 4 [Source:HGNC Symbol;Acc:6862]                                            | chr3  | 47892182  | 48130769  | 1371          | 0.422    | 2        | 1         | 9.144E-03 | 1.837E-02 | PB-GT      |
| C17orf87    | chromosome 17 open reading frame 87 [Source:HGNC Symbol;Acc:27900]                                        | chr17 | 54869274  | 54916134  | 280           | 0.142    | 1        | 1         | 9.156E-03 | 1.837E-02 | PB-GT      |
| UGALNT15    | UGALNT15, D-galactose-4-epimerase N-acetylgalactosaminyltransferase-like 5 [Source:HGNC Symbol;Acc:21725] | chr2  | 151534484 | 151770119 | 492           | 0.142    | 1        | 1         | 9.158E-03 | 1.838E-02 | PB-GT      |
| NOSTRIN     | nitric oxide synthase trafficker [Source:HGNC Symbol;Acc:20203]                                           | chr2  | 169643049 | 169722024 | 497           | 0.142    | 1        | 1         | 9.192E-03 | 1.842E-02 | PB-GT      |
| SERGEF      | secretion regulating guanine nucleotide exchange factor [Source:HGNC Symbol;Acc:17499]                    | chr11 | 17809595  | 18233709  | 1218          | 0.423    | 2        | 2         | 9.196E-03 | 1.842E-02 | PB-GT      |
| AHNAK       | AHNAK nucleoprotein [Source:HGNC Symbol;Acc:347]                                                          | chr16 | 62201016  | 62332707  | 410           | 0.142    | 1        | 1         | 9.210E-03 | 1.844E-02 | PB-GT      |
| PPP4R1      | protein phosphatase 4, regulatory subunit 1 [Source:HGNC Symbol;Acc:9320]                                 | chr8  | 95164899  | 95164899  | 585           | 0.143    | 1        | 1         | 9.248E-03 | 1.845E-02 | PB-GT      |
| ABC7        | ATP-binding cassette, sub-family B (MDR/TAP), member 7 [Source:HGNC Symbol;Acc:48]                        | chrX  | 74273115  | 74376567  | 856           | 0.143    | 1        | 1         | 9.253E-03 | 1.850E-02 | PB-GT      |
| LINC00707   | long intergenic non-protein coding RNA 707 [Source:HGNC Symbol;Acc:44691]                                 | chr10 | 6821560   | 6884888   | 400           | 0.143    | 1        | 1         | 9.270E-03 | 1.852E-02 | PB-GT      |
| LINC00469   | long intergenic non-protein coding RNA 469 [Source:HGNC Symbol;Acc:28863]                                 | chr17 | 71746469  | 71764699  | 282           | 0.143    | 1        | 1         | 9.281E-03 | 1.852E-02 | PB-GT      |
| CHEK2       | checkpoint kinase 2 [Source:HGNC Symbol;Acc:16827]                                                        | chr2  | 29087231  | 29087231  | 286           | 0.143    | 1        | 1         | 9.288E-03 | 1.852E-02 | PB-GT      |
| PEL1        | pellino E3 ubiquitin protein ligase 1 [Source:HGNC Symbol;Acc:8827]                                       | chr2  | 64319786  | 64371588  | 500           | 0.143    | 1        | 1         | 9.298E-03 | 1.854E-02 | PB-GT      |
| ABHD12      | abhydrolase domain containing 12 [Source:HGNC Symbol;Acc:15868]                                           | chr20 | 25257379  | 25371819  | 396           | 0.143    | 1        | 1         | 9.360E-03 | 1.865E-02 | PB-GT      |
| FOXJ3       | forkhead box J3 [Source:HGNC Symbol;Acc:29178]                                                            | chr1  | 42842210  | 42901548  | 1199          | 0.426    | 2        | 1         | 9.372E-03 | 1.866E-02 | PB-GT      |
| KIAA1324    | KIAA family, member C [Source:HGNC Symbol;Acc:29818]                                                      | chr1  | 109656301 | 109749441 | 405           | 0.144    | 1        | 1         | 9.386E-03 | 1.868E-02 | PB-GT      |
| SP140L      | SP140 nuclear body protein-like [Source:HGNC Symbol;Acc:25105]                                            | chr2  | 23119189  | 231268447 | 503           | 0.144    | 1        | 1         | 9.405E-03 | 1.870E-02 | PB-GT      |
| TRAPPC10    | trafficking protein particle complex 10 [Source:HGNC Symbol;Acc:11868]                                    | chr21 | 45432200  | 45526433  | 503           | 0.144    | 1        | 1         | 9.415E-03 | 1.870E-02 | PB-GT      |
| BAZ2B       | bromodomain adjacent to zinc finger domain, V1 [Source:HGNC Symbol;Acc:963]                               | chr2  | 160175490 | 160473203 | 2828          | 0.809    | 3        | 3         | 9.418E-03 | 1.874E-02 | PB-GT      |
| OSBPPL1     | OSBPPL1 protein-like 6 [Source:HGNC Symbol;Acc:16388]                                                     | chr2  | 179295298 | 179295298 | 1             | 0.829    | 4        | 1         | 9.472E-03 | 1.875E-02 | PB-GT      |
| ATP6V1C1    | ATPase, H+ transporting, lysosomal 4kDa, B1 subunit C1 [Source:HGNC Symbol;Acc:856]                       | chr8  | 104033291 | 104082719 | 421           | 0.144    | 1        | 1         | 9.454E-03 | 1.876E-02 | PB-GT      |
| NEK5        | NIMA-related kinase 5 [Source:HGNC Symbol;Acc:7748]                                                       | chr13 | 52611093  | 52703214  | 595           | 0.144    | 1        | 1         | 9.482E-03 | 1.879E-02 | PB-GT      |
| ZNF782      | zinc finger protein 782 [Source:HGNC Symbol;Acc:33110]                                                    | chr9  | 99578754  | 99637905  | 386           | 0.145    | 1        | 1         | 9.523E-03 | 1.885E-02 | PB-GT      |
| ZC3H4V1     | zinc finger CCH-type, antiviral 1 [Source:HGNC Symbol;Acc:23272]                                          | chr9  | 139728266 | 139734465 | 390           | 0.145    | 1        | 1         | 9.585E-03 | 1.892E-02 | PB-GT      |
| MAP6        | microtubule-associated protein 6 [Source:HGNC Symbol;Acc:6868]                                            | chr11 | 75297963  | 75380165  | 418           | 0.145    | 1        | 1         | 9.555E-03 | 1.898E-02 | PB-GT      |
| TMBIM4      | transmembrane BAX inhibitor motif containing 4 [Source:HGNC Symbol;Acc:24257]                             | chr12 | 66517709  | 66563822  | 380           | 0.145    | 1        | 1         | 9.611E-03 | 1.899E-02 | PB-GT      |
| GOLM1       | golgi membrane protein 1 [Source:HGNC Symbol;Acc:15451]                                                   | chr9  | 88841061  | 88715088  | 358           | 0.146    | 1        | 1         | 9.617E-03 | 1.899E-02 | PB-GT      |
| PH4H3       | proline 4-hydroxylase, alpha polypeptide III [Source:HGNC Symbol;Acc:30135]                               | chr7  | 73948846  | 74025272  | 393           | 0.146    | 1        | 1         | 9.646E-03 | 1.902E-02 | PB-GT      |
| NAMPT       | nicotinamide phosphoribosyltransferase [Source:HGNC Symbol;Acc:30092]                                     | chr7  | 105888731 | 105926772 | 393           | 0.146    | 1        | 1         | 9.667E-03 | 1.906E-02 | PB-GT      |
| UBA2        | ubiquitin-like modifier activating enzyme 2 [Source:HGNC Symbol;Acc:30661]                                | chr19 | 34919264  | 34960853  | 277           | 0.146    | 1        | 1         | 9.698E-03 | 1.911E-02 | PB-GT      |
| ARNT        | aryl hydrocarbon receptor nuclear translocator [Source:HGNC Symbol;Acc:700]                               | chr1  | 150782181 | 150846244 | 413           | 0.147    | 1        | 1         | 9.753E-03 | 1.920E-02 | PB-GT      |
| SGRP1       | signal R-protein lyase 1 [Source:HGNC Symbol;Acc:9817]                                                    | chr1  | 72571517  | 72639930  | 411           | 0.147    | 1        | 1         | 9.715E-03 | 1.921E-02 | PB-GT      |
| ADORA2A-AS1 | ADORA2A antisense RNA 1 [Source:HGNC Symbol;Acc:37122]                                                    | chr22 | 24825178  | 24891042  | 294           | 0.147    | 1        | 1         | 9.787E-03 | 1.924E-02 | PB-GT      |
| PVT1        | Pvt1 oncogene (non-protein coding) [Source:HGNC Symbol;Acc:9709]                                          | chr8  | 128806779 | 129113499 | 1263          | 0.433    | 2        | 1         | 9.796E-03 | 1.925E-02 | PB-GT      |
| ANTXR1      | anthrax toxin receptor 1 [Source:HGNC Symbol;Acc:21014]                                                   | chr2  | 69240310  | 69476459  | 1514          | 0.433    | 2        | 1         | 9.811E-03 | 1.        |            |

table S2. Genes with significant transcription integrations in RKO BRAF<sup>WT</sup> cells after selection in low glucose medium

| Gene ID   | Description                                                                                                                 | Chrom | Start     | End       | # TAA sites | Expected | Observed | Libraries | P         | FDR       | Transposon |
|-----------|-----------------------------------------------------------------------------------------------------------------------------|-------|-----------|-----------|-------------|----------|----------|-----------|-----------|-----------|------------|
| TMEM71    | transmembrane protein 71 [Source:HGNC Symbol;Acc:26572]                                                                     | chr8  | 133697253 | 133772958 | 468         | 0.160    | 1        | 1         | 1.156E-02 | 2.179E-02 | PB-GT      |
| CROT      | D-actinolytic protein [Source:HGNC Symbol;Acc:23661]                                                                        | chr7  | 8551797   | 8702911   | 432         | 0.160    | 1        | 1         | 1.179E-02 | 2.179E-02 | PB-GT      |
| KRIT1     | KRIT1, ankyrin repeat containing [Source:HGNC Symbol;Acc:1573]                                                              | chr7  | 91828283  | 91875840  | 433         | 0.161    | 1        | 1         | 1.162E-02 | 2.187E-02 | PB-GT      |
| DDX46     | DEAD (Asp-Glu-Ala-Asp) box polypeptide 46 [Source:HGNC Symbol;Acc:18681]                                                    | chr5  | 134094469 | 134190823 | 597         | 0.161    | 1        | 1         | 1.163E-02 | 2.189E-02 | PB-GT      |
| G9orf41   | chromosome 9 open reading frame 41 [Source:HGNC Symbol;Acc:23435]                                                           | chr9  | 77595936  | 77643339  | 430         | 0.161    | 1        | 1         | 1.169E-02 | 2.197E-02 | PB-GT      |
| GPR126    | G-protein-coupled receptor 126 [Source:HGNC Symbol;Acc:13841]                                                               | chr6  | 142622391 | 142761703 | 1346        | 0.162    | 2        | 2         | 1.169E-02 | 2.197E-02 | PB-GT      |
| AP1B1     | adaptor-related protein complex 1, beta subunit [Source:HGNC Symbol;Acc:554]                                                | chr22 | 29723669  | 29819168  | 323         | 0.161    | 1        | 1         | 1.170E-02 | 2.197E-02 | PB-GT      |
| ZNF571    | zinc finger protein 571 [Source:HGNC Symbol;Acc:25000]                                                                      | chr19 | 38045684  | 38085673  | 306         | 0.161    | 1        | 1         | 1.171E-02 | 2.197E-02 | PB-GT      |
| HRH1      | histamine receptor H1 [Source:HGNC Symbol;Acc:5182]                                                                         | chr3  | 11178779  | 11305243  | 525         | 0.162    | 1        | 1         | 1.172E-02 | 2.197E-02 | PB-GT      |
| APOLD1    | apolipoprotein L domain containing 1 [Source:HGNC Symbol;Acc:25268]                                                         | chr15 | 5887403   | 5942177   | 1315        | 0.166    | 2        | 2         | 1.173E-02 | 2.197E-02 | PB-GT      |
| PTPN1     | protein tyrosine phosphatase, non-receptor type 1 [Source:HGNC Symbol;Acc:9642]                                             | chr20 | 49128891  | 49201259  | 446         | 0.162    | 1        | 1         | 1.173E-02 | 2.197E-02 | PB-GT      |
| LPIN2     | lipin 2 [Source:HGNC Symbol;Acc:14450]                                                                                      | chr18 | 2916992   | 3013313   | 676         | 0.162    | 1        | 1         | 1.177E-02 | 2.203E-02 | PB-GT      |
| C12orf45  | chromosome 12 open reading frame 45 [Source:HGNC Symbol;Acc:28628]                                                          | chr12 | 105380088 | 105443515 | 423         | 0.162    | 1        | 1         | 1.178E-02 | 2.203E-02 | PB-GT      |
| SV2C      | synaptic vesicle glycoprotein 2C [Source:HGNC Symbol;Acc:30670]                                                             | chr7  | 7537897   | 75494764  | 1726        | 0.165    | 2        | 2         | 1.188E-02 | 2.220E-02 | PB-GT      |
| CRISPLD1  | cysteine-rich secretory protein LCLL domain containing 1 [Source:HGNC Symbol;Acc:18206]                                     | chr8  | 75896750  | 75949793  | 475         | 0.163    | 1        | 1         | 1.189E-02 | 2.220E-02 | PB-GT      |
| SCAF4     | SR-related CTD-associated factor 4 [Source:HGNC Symbol;Acc:19304]                                                           | chr21 | 33043346  | 33104388  | 569         | 0.163    | 1        | 1         | 1.190E-02 | 2.221E-02 | PB-GT      |
| GDI2      | GDP dissociation inhibitor 2 [Source:HGNC Symbol;Acc:4227]                                                                  | chr10 | 5807186   | 5804905   | 457         | 0.163    | 1        | 1         | 1.194E-02 | 2.227E-02 | PB-GT      |
| ADAM10    | ADAM metalloproteinase domain 10 [Source:HGNC Symbol;Acc:188]                                                               | chr15 | 5887403   | 5942177   | 1315        | 0.166    | 2        | 2         | 1.197E-02 | 2.230E-02 | PB-GT      |
| BRCA2     | breast cancer 2, early onset [Source:HGNC Symbol;Acc:1101]                                                                  | chr13 | 32898611  | 32973805  | 674         | 0.164    | 1        | 1         | 1.201E-02 | 2.238E-02 | PB-GT      |
| EFCAB13   | EF-hand calcium binding domain 13 [Source:HGNC Symbol;Acc:28864]                                                            | chr17 | 45400656  | 45518678  | 923         | 0.168    | 2        | 2         | 1.205E-02 | 2.241E-02 | PB-GT      |
| TBL1XR1   | transducin (beta)-like 1 X-linked receptor [Source:HGNC Symbol;Acc:29529]                                                   | chr3  | 176737143 | 176915261 | 1520        | 0.168    | 2        | 2         | 1.205E-02 | 2.241E-02 | PB-GT      |
| GPR142R2A | G-protein-coupled receptor 142, retinal, type II, alpha [Source:HGNC Symbol;Acc:9391]                                       | chr3  | 49782030  | 49858270  | 533         | 0.164    | 1        | 1         | 1.206E-02 | 2.242E-02 | PB-GT      |
| UCK2      | uridine-cytidine kinase 2 [Source:HGNC Symbol;Acc:12662]                                                                    | chr1  | 165796768 | 165880555 | 462         | 0.164    | 1        | 1         | 1.207E-02 | 2.242E-02 | PB-GT      |
| RPRED1A   | regulation of nuclear pre-mRNA domain containing 1A [Source:HGNC Symbol;Acc:25560]                                          | chr15 | 33564350  | 33647359  | 685         | 0.164    | 1        | 1         | 1.207E-02 | 2.242E-02 | PB-GT      |
| WDR37     | WD repeat domain protein 37 [Source:HGNC Symbol;Acc:31406]                                                                  | chr10 | 1095478   | 1178227   | 460         | 0.164    | 1        | 1         | 1.209E-02 | 2.243E-02 | PB-GT      |
| CD51      | glycoprotein CD51 (phosphatidyl cytosyltransferase) 1 [Source:HGNC Symbol;Acc:1800]                                         | chr17 | 8551797   | 8551797   | 432         | 0.160    | 1        | 1         | 1.209E-02 | 2.243E-02 | PB-GT      |
| HKR1      | HKR1, GLK/Kuppel zinc finger family member [Source:HGNC Symbol;Acc:4928]                                                    | chr19 | 37037339  | 37860267  | 132         | 0.165    | 1        | 1         | 1.215E-02 | 2.252E-02 | PB-GT      |
| RFK7      | regulatory factor X, 7 [Source:HGNC Symbol;Acc:25777]                                                                       | chr15 | 56379478  | 56535483  | 1354        | 0.471    | 2        | 2         | 1.228E-02 | 2.272E-02 | PB-GT      |
| DXDC1     | DX domain containing 1 [Source:HGNC Symbol;Acc:23695]                                                                       | chr11 | 111797868 | 111893308 | 477         | 0.166    | 1        | 1         | 1.228E-02 | 2.272E-02 | PB-GT      |
| LINC00395 | long intergenic non-protein coding RNA 395 [Source:HGNC Symbol;Acc:42723]                                                   | chr13 | 64241814  | 64312151  | 684         | 0.166    | 1        | 1         | 1.235E-02 | 2.285E-02 | PB-GT      |
| GFSM2     | G-protein signaling modulator 2 [Source:HGNC Symbol;Acc:29501]                                                              | chr1  | 109417872 | 109473044 | 470         | 0.167    | 1        | 1         | 1.240E-02 | 2.316E-02 | PB-GT      |
| MORF4L1   | mortality factor 4 like 1 [Source:HGNC Symbol;Acc:16989]                                                                    | chr13 | 79102829  | 79190475  | 480         | 0.167    | 1        | 1         | 1.247E-02 | 2.304E-02 | PB-GT      |
| YYWAE     | lysine 3-monoxygenase/tryptophan 5-monoxygenase activation protein, epsilon polypeptide [Source:HGNC Symbol;Acc:12]         | chr17 | 1247566   | 1303672   | 331         | 0.168    | 1        | 1         | 1.258E-02 | 2.322E-02 | PB-GT      |
| NCOR2     | nuclear receptor corepressor 2 [Source:HGNC Symbol;Acc:7673]                                                                | chr12 | 124808961 | 12505135  | 440         | 0.168    | 1        | 1         | 1.259E-02 | 2.340E-02 | PB-GT      |
| DCUN1D4   | DCN1, desferrioxamine B domain containing 4 (S. cerevisiae) [Source:HGNC Symbol;Acc:28998]                                  | chr16 | 52789166  | 52793166  | 595         | 0.168    | 2        | 2         | 1.269E-02 | 2.340E-02 | PB-GT      |
| LTN1      | listerin E3 ubiquitin protein ligase 1 [Source:HGNC Symbol;Acc:13082]                                                       | chr21 | 30304466  | 30365277  | 589         | 0.169    | 1        | 1         | 1.270E-02 | 2.340E-02 | PB-GT      |
| COPB1     | coatomer protein complex, subunit beta 1 [Source:HGNC Symbol;Acc:2231]                                                      | chr11 | 14446496  | 14521573  | 486         | 0.169    | 1        | 1         | 1.272E-02 | 2.341E-02 | PB-GT      |
| ANF3ZAP1  | acidic (leucine-rich) nuclear phosphoprotein 32 family, member A pseudogene 1 [Source:HGNC Symbol;Acc:42949]                | chr15 | 35474000  | 35530398  | 485         | 0.169    | 1        | 1         | 1.272E-02 | 2.341E-02 | PB-GT      |
| Korf159   | kinase domain containing 159 [Source:HGNC Symbol;Acc:20498]                                                                 | chr1  | 91891004  | 91891004  | 432         | 0.166    | 1        | 1         | 1.276E-02 | 2.346E-02 | PB-GT      |
| IWS1      | IWS1 homolog (S. cerevisiae) [Source:HGNC Symbol;Acc:25467]                                                                 | chr12 | 12819783  | 128284662 | 591         | 0.169    | 1        | 1         | 1.277E-02 | 2.346E-02 | PB-GT      |
| FOXP1     | forkhead box P1 [Source:HGNC Symbol;Acc:3823]                                                                               | chr3  | 7103844   | 71633140  | 4425        | 1.361    | 4        | 4         | 1.278E-02 | 2.346E-02 | PB-GT      |
| NUF37     | nucleolin 37kDa [Source:HGNC Symbol;Acc:29929]                                                                              | chr12 | 102407967 | 102513902 | 442         | 0.169    | 1        | 1         | 1.280E-02 | 2.348E-02 | PB-GT      |
| SGSM2     | sphingomyelinase 1 [Source:HGNC Symbol;Acc:29790]                                                                           | chr16 | 52083390  | 52083390  | 445         | 0.168    | 1        | 1         | 1.285E-02 | 2.350E-02 | PB-GT      |
| STXBP6    | syntaxin binding protein 6 (amysin) [Source:HGNC Symbol;Acc:19666]                                                          | chr14 | 25278862  | 25519503  | 1766        | 0.479    | 2        | 2         | 1.284E-02 | 2.354E-02 | PB-GT      |
| HSP44     | heat shock 70kDa protein 4-like [Source:HGNC Symbol;Acc:17041]                                                              | chr4  | 128702978 | 128755226 | 599         | 0.170    | 1        | 1         | 1.285E-02 | 2.354E-02 | PB-GT      |
| PHTF1     | putative homeodomain transcription factor 1 [Source:HGNC Symbol;Acc:8939]                                                   | chr1  | 114239453 | 114302111 | 478         | 0.170    | 1        | 1         | 1.287E-02 | 2.355E-02 | PB-GT      |
| PTPN22    | protein tyrosine phosphatase, non-receptor type 21 [Source:HGNC Symbol;Acc:9651]                                            | chr8  | 89921072  | 89921072  | 639         | 0.172    | 1        | 1         | 1.288E-02 | 2.355E-02 | PB-GT      |
| SLC35A3   | solute carrier family 35 (UDP-N-acetylglucosamine (UDP-GlcNAc) transporter), member A3 [Source:HGNC Symbol;Acc:11023]       | chr1  | 104433545 | 104923555 | 479         | 0.170    | 1        | 1         | 1.292E-02 | 2.359E-02 | PB-GT      |
| PCBD2     | pterin-4 alpha-carbonylamine dehydratase/dimerization cofactor of hepatocyte nuclear factor 1 alpha (TCF1) 2 [Source:HGNC S | chr5  | 134240596 | 134434649 | 631         | 0.170    | 1        | 1         | 1.292E-02 | 2.359E-02 | PB-GT      |
| HMG20A    | high mobility group 20A [Source:HGNC Symbol;Acc:5001]                                                                       | chr15 | 77172754  | 77177949  | 489         | 0.170    | 1        | 1         | 1.292E-02 | 2.359E-02 | PB-GT      |
| COMMD1    | COMMD1 (Mutr) domain containing 1 [Source:HGNC Symbol;Acc:23024]                                                            | chr16 | 92145859  | 92374392  | 1680        | 0.170    | 1        | 1         | 1.293E-02 | 2.361E-02 | PB-GT      |
| LRP6      | low density lipoprotein receptor-related protein 6 [Source:HGNC Symbol;Acc:6698]                                            | chr12 | 12268959  | 12419946  | 1255        | 0.480    | 2        | 2         | 1.295E-02 | 2.361E-02 | PB-GT      |
| CAMSAP1   | calmodulin regulated spectrin-associated protein 1 [Source:HGNC Symbol;Acc:19948]                                           | chr9  | 138700333 | 138790074 | 454         | 0.170    | 1        | 1         | 1.295E-02 | 2.361E-02 | PB-GT      |
| ARL2      | aroyl-beta (A4) precursor-like protein 2 [Source:HGNC Symbol;Acc:598]                                                       | chr11 | 12963932  | 130014699 | 491         | 0.170    | 1        | 1         | 1.297E-02 | 2.361E-02 | PB-GT      |
| CZAR1     | CZAR1, cyclase and apoptosis regulator 1 [Source:HGNC Symbol;Acc:24236]                                                     | chr1  | 70480789  | 70541717  | 484         | 0.171    | 1        | 1         | 1.303E-02 | 2.366E-02 | PB-GT      |
| TPTPE25   | transmembrane phosphoinositide 3-phosphatase and tensin homolog 2 pseudogene 5 [Source:HGNC Symbol;Acc:42356]               | chr13 | 41396432  | 41495980  | 703         | 0.171    | 1        | 1         | 1.301E-02 | 2.366E-02 | PB-GT      |
| MYSM1     | Myb-like, SWIRM and MPN domains 1 [Source:HGNC Symbol;Acc:29401]                                                            | chr1  | 59120411  | 59165764  | 482         | 0.171    | 1        | 1         | 1.307E-02 | 2.375E-02 | PB-GT      |
| RSBN1     | rodent sperm basic protein 1 [Source:HGNC Symbol;Acc:25642]                                                                 | chr1  | 114304454 | 114356098 | 482         | 0.171    | 1        | 1         | 1.307E-02 | 2.375E-02 | PB-GT      |
| YWJC2     | YWJC2 domain containing 2 [Source:HGNC Symbol;Acc:20092]                                                                    | chr12 | 158420948 | 158420948 | 475         | 0.168    | 1        | 1         | 1.311E-02 | 2.381E-02 | PB-GT      |
| ALDH1L2   | aldehyde dehydrogenase 1 family, member L2 [Source:HGNC Symbol;Acc:26777]                                                   | chr12 | 105413568 | 105478355 | 448         | 0.172    | 1        | 1         | 1.313E-02 | 2.382E-02 | PB-GT      |
| ATF7IP    | activating transcription factor 7 interacting protein [Source:HGNC Symbol;Acc:20092]                                        | chr12 | 14518610  | 14651897  | 1282        | 0.483    | 2        | 2         | 1.314E-02 | 2.383E-02 | PB-GT      |
| ZNF268    | zinc finger protein 268 [Source:HGNC Symbol;Acc:13061]                                                                      | chr12 | 133707510 | 133783698 | 449         | 0.172    | 1        | 1         | 1.319E-02 | 2.389E-02 | PB-GT      |
| NTF53A    | N-terminal cytosolic, cytosolic IIIA [Source:HGNC Symbol;Acc:7820]                                                          | chr2  | 39353742  | 39353742  | 463         | 0.172    | 1        | 1         | 1.320E-02 | 2.390E-02 | PB-GT      |
| SLC4A5    | solute carrier family 4, sodium bicarbonate cotransporter, member 5 [Source:HGNC Symbol;Acc:18168]                          | chr2  | 74443369  | 74570541  | 602         | 0.172    | 1        | 1         | 1.322E-02 | 2.393E-02 | PB-GT      |
| ELK3      | ELK3, ETS-domain protein (SRF accessory protein 2) [Source:HGNC Symbol;Acc:3325]                                            | chr12 | 96588160  | 96663613  | 450         | 0.172    | 1        | 1         | 1.324E-02 | 2.396E-02 | PB-GT      |
| KIF11     | kinase family member 11 [Source:HGNC Symbol;Acc:6388]                                                                       | chr10 | 94353043  | 94415150  | 463         | 0.172    | 1        | 1         | 1.325E-02 | 2.396E-02 | PB-GT      |
| SF3       | Sp1 transcription factor 3 [Source:HGNC Symbol;Acc:11291]                                                                   | chr17 | 174717187 | 174813403 | 605         | 0.173    | 1        | 1         | 1.326E-02 | 2.397E-02 | PB-GT      |
| PPP3CA    | protein phosphatase 3, catalytic subunit, alpha isozyme [Source:HGNC Symbol;Acc:9314]                                       | chr4  | 101944566 | 102294355 | 3174        | 0.899    | 3        | 3         | 1.339E-02 | 2.417E-02 | PB-GT      |
| PKIX      | protein kinase (cAMP-dependent, catalytic) inhibitor gamma [Source:HGNC Symbol;Acc:9019]                                    | chr20 | 43160426  | 43252888  | 479         | 0.174    | 1        | 1         | 1.343E-02 | 2.422E-02 | PB-GT      |
| TFB1M     | transcription factor B1, mitochondrial [Source:HGNC Symbol;Acc:17037]                                                       | chr6  | 155578643 | 155635627 | 506         | 0.174    | 1        | 1         | 1.348E-02 | 2.427E-02 | PB-GT      |
| KIT       | v-kit tyrosine kinase, sarcoma viral oncogene homolog [Source:HGNC Symbol;Acc:6342]                                         | chr2  | 65524895  | 65524895  | 414         | 0.174    | 1        | 1         | 1.347E-02 | 2.427E-02 | PB-GT      |
| ZNF81     | zinc finger protein 81 [Source:HGNC Symbol;Acc:13158]                                                                       | chrX  | 47861901  | 47861901  | 104         | 0.174    | 1        | 1         | 1.348E-02 | 2.428E-02 | PB-GT      |
| CWC22     | CWC22 spliceosome-associated protein homolog (S. cerevisiae) [Source:HGNC Symbol;Acc:29322]                                 | chr2  | 180809603 | 180871840 | 609         | 0.174    | 1        | 1         | 1.351E-02 | 2.432E-02 | PB-GT      |
| SLG3L1    | SH3-domain GRB2-like endothelin B1 [Source:HGNC Symbol;Acc:10833]                                                           | chr1  | 87170259  | 87193867  | 491         | 0.174    | 1        | 1         | 1.354E-02 | 2.434E-02 | PB-GT      |
| BRNF      | brain-specific neurotrophic factor [Source:HGNC Symbol;Acc:1033]                                                            | chr1  | 27876440  | 27876440  | 503         | 0.175    | 1        | 1         | 1.357E-02 | 2.437E-02 | PB-GT      |
| OSBP1     | oxysterol binding protein-like 3 [Source:HGNC Symbol;Acc:16370]                                                             | chr7  | 24836158  | 25021253  | 1319        | 0.490    | 2        | 2         | 1.363E-02 | 2.447E-02 | PB-GT      |
| ARAP2     | ArfGAP with RhoGAP domain, ankyrin repeat and PH domain 2 [Source:HGNC Symbol;Acc:16924]                                    | chr4  | 30676220  | 30624611  | 1731        | 0.490    | 2        | 2         | 1.365E-02 | 2.450E-02 | PB-GT      |
| RAP1B     | RAP1B, member of RAS oncogene protein [Source:HGNC Symbol;Acc:9857]                                                         | chr19 | 69048619  |           |             |          |          |           |           |           |            |

**table S2. Genes with significant transposon integrations in RKO BRAF<sup>WT</sup> cells after selection in low glucose medium**

| Gene ID   | Description                                                                                                                        | Chrom | Start     | End       | # TTAAs sites | Expected | Observed | Libraries | P         | FDR       | Transposon |
|-----------|------------------------------------------------------------------------------------------------------------------------------------|-------|-----------|-----------|---------------|----------|----------|-----------|-----------|-----------|------------|
| ATP6AP1L  | ATPase, H+ transporting, lysosomal accessory protein 1-like [Source:HGNC Symbol;Acc:28091]                                         | chr5  | 81575281  | 81682796  | 691           | 0.186    | 1        | 1         | 1.533E-02 | 2.649E-02 | PG-BT      |
| MTMR8     | myotubularin related protein 8 [Source:HGNC Symbol;Acc:16825]                                                                      | chrX  | 6344187   | 63451333  | 1138          | 0.186    | 1        | 1         | 1.534E-02 | 2.649E-02 | PG-BT      |
| NPTN      | neuropilin [Source:HGNC Symbol;Acc:17867]                                                                                          | chr15 | 73825355  | 73928475  | 386           | 0.186    | 1        | 1         | 1.536E-02 | 2.649E-02 | PG-BT      |
| ASH1L     | ash1 (absent, small, or homeotic)-like (Drosophila) [Source:HGNC Symbol;Acc:19088]                                                 | chr1  | 155305059 | 15532598  | 1444          | 0.513    | 2        | 2         | 1.536E-02 | 2.649E-02 | PG-BT      |
| ERGIC2    | ERGIC and golgi 2 [Source:HGNC Symbol;Acc:30208]                                                                                   | chr12 | 29490285  | 29534122  | 487           | 0.186    | 1        | 1         | 1.537E-02 | 2.649E-02 | PG-BT      |
| CTNBP2    | catenin binding protein 2 [Source:HGNC Symbol;Acc:15679]                                                                           | chr10 | 117350505 | 117514193 | 1386          | 0.515    | 2        | 2         | 1.552E-02 | 2.744E-02 | PG-BT      |
| SYCP2L    | synaptonemal complex protein 2-like [Source:HGNC Symbol;Acc:21537]                                                                 | chr6  | 10748027  | 10799553  | 1501          | 0.516    | 2        | 1         | 1.560E-02 | 2.685E-02 | PG-BT      |
| AP3S1     | adaptor-related protein complex 3, sigma 1 subunit [Source:HGNC Symbol;Acc:2013]                                                   | chr5  | 115177178 | 115249778 | 700           | 0.189    | 1        | 1         | 1.571E-02 | 2.701E-02 | PG-BT      |
| ANKRD18CP | ankyrin repeat domain 18C, pseudogene [Source:HGNC Symbol;Acc:43601]                                                               | chr9  | 99918852  | 99983517  | 503           | 0.189    | 1        | 1         | 1.571E-02 | 2.701E-02 | PG-BT      |
| MYH14     | DEAH (Asp-Glu-Ala-His) box polypeptide 15 [Source:HGNC Symbol;Acc:23212]                                                           | chr1  | 44949072  | 45293274  | 670           | 0.192    | 1        | 1         | 1.575E-02 | 2.706E-02 | PG-BT      |
| ZNF106    | zinc finger protein 106 [Source:HGNC Symbol;Acc:11968]                                                                             | chr15 | 46705021  | 42783321  | 545           | 0.190    | 1        | 1         | 1.585E-02 | 2.721E-02 | PG-BT      |
| PAPOLA    | poly(A) polymerase alpha [Source:HGNC Symbol;Acc:14981]                                                                            | chr14 | 96967770  | 97033448  | 700           | 0.190    | 1        | 1         | 1.589E-02 | 2.726E-02 | PG-BT      |
| SH2D4B    | SH2 domain containing 4B [Source:HGNC Symbol;Acc:31440]                                                                            | chr10 | 82297658  | 82406316  | 532           | 0.190    | 1        | 1         | 1.590E-02 | 2.726E-02 | PG-BT      |
| AKC       | adenylate kinase 4 [Source:HGNC Symbol;Acc:363]                                                                                    | chr1  | 55613232  | 55997828  | 535           | 0.190    | 1        | 1         | 1.591E-02 | 2.726E-02 | PG-BT      |
| JUP       | junction plakoglobin [Source:HGNC Symbol;Acc:8207]                                                                                 | chr17 | 39775692  | 39943183  | 375           | 0.190    | 1        | 1         | 1.591E-02 | 2.726E-02 | PG-BT      |
| STAG1     | stromal antigen 1 [Source:HGNC Symbol;Acc:11354]                                                                                   | chr3  | 136055077 | 136471220 | 3082          | 0.948    | 3        | 2         | 1.597E-02 | 2.734E-02 | PG-BT      |
| CLINT1    | clathrin interactor 1 [Source:HGNC Symbol;Acc:23186]                                                                               | chr5  | 157212751 | 15728183  | 707           | 0.191    | 1        | 1         | 1.600E-02 | 2.736E-02 | PG-BT      |
| DKX15     | DEAH (Asp-Glu-Ala-His) box polypeptide 15 [Source:HGNC Symbol;Acc:2738]                                                            | chr1  | 24519064  | 24586173  | 673           | 0.191    | 1        | 1         | 1.600E-02 | 2.736E-02 | PG-BT      |
| LINC00159 | long intergenic non-protein coding RNA 159 [Source:HGNC Symbol;Acc:1285]                                                           | chr21 | 33452629  | 33570125  | 666           | 0.191    | 1        | 1         | 1.601E-02 | 2.736E-02 | PG-BT      |
| C7orf49   | chromosome 7 open reading frame 49 [Source:HGNC Symbol;Acc:22432]                                                                  | chr7  | 134771115 | 134855547 | 514           | 0.191    | 1        | 1         | 1.608E-02 | 2.742E-02 | PG-BT      |
| GANC      | glucosidase, alpha, neutral C [Source:HGNC Symbol;Acc:4139]                                                                        | chr15 | 42565431  | 42645864  | 549           | 0.191    | 1        | 1         | 1.608E-02 | 2.742E-02 | PG-BT      |
| HS72BP    | hepatocellular carcinoma cell-specific 72 binding protein [Source:HGNC Symbol;Acc:5226]                                            | chr12 | 44949072  | 45293274  | 670           | 0.192    | 1        | 1         | 1.619E-02 | 2.762E-02 | PG-BT      |
| FOLH1B    | foliate hydrolase 1B [Source:HGNC Symbol;Acc:13636]                                                                                | chr11 | 89371683  | 89431886  | 553           | 0.192    | 1        | 1         | 1.622E-02 | 2.765E-02 | PG-BT      |
| ZPLD1     | zona pellucida-like domain containing 1 [Source:HGNC Symbol;Acc:27022]                                                             | chr3  | 101818088 | 102198865 | 3103          | 0.955    | 3        | 2         | 1.633E-02 | 2.782E-02 | PG-BT      |
| TNRC8B    | trinucleotide repeat containing 6B [Source:HGNC Symbol;Acc:29190]                                                                  | chr22 | 40440821  | 40731811  | 1912          | 0.955    | 3        | 2         | 1.637E-02 | 2.787E-02 | PG-BT      |
| MED13     | mediator complex subunit 13 [Source:HGNC Symbol;Acc:22474]                                                                         | chr10 | 100319562 | 100375962 | 1037          | 0.282    | 1        | 1         | 1.638E-02 | 2.787E-02 | PG-BT      |
| SPATA7    | spERMato-genesis associated 7 [Source:HGNC Symbol;Acc:20423]                                                                       | chr14 | 88512268  | 88936694  | 712           | 0.193    | 1        | 1         | 1.641E-02 | 2.791E-02 | PG-BT      |
| FBXO42    | F-box protein 42 [Source:HGNC Symbol;Acc:29249]                                                                                    | chr1  | 16573334  | 16678949  | 545           | 0.193    | 1        | 1         | 1.647E-02 | 2.799E-02 | PG-BT      |
| NCK1      | NCK adaptor protein 1 [Source:HGNC Symbol;Acc:7644]                                                                                | chr3  | 136581050 | 136668665 | 629           | 0.193    | 1        | 1         | 1.647E-02 | 2.799E-02 | PG-BT      |
| PFM1B     | protein phosphatase, Mg2+/Mn2+ dependent, 1B [Source:HGNC Symbol;Acc:9276]                                                         | chr2  | 44395108  | 44471523  | 679           | 0.194    | 1        | 1         | 1.658E-02 | 2.816E-02 | PG-BT      |
| NEDDL     | neural precursor cell expressed, developmentally down-regulated 4-like, E3 ubiquitin protein ligase [Source:HGNC Symbol;Acc:16463] | chr2  | 153508107 | 153574511 | 682           | 0.195    | 1        | 1         | 1.672E-02 | 2.835E-02 | PG-BT      |
| PRPF40A   | PRP40 pre-mRNA processing factor 40 homolog A (S. cerevisiae) [Source:HGNC Symbol;Acc:16463]                                       | chr7  | 173684080 | 173755840 | 550           | 0.195    | 1        | 1         | 1.675E-02 | 2.840E-02 | PG-BT      |
| KLHL20    | WD repeat domain 20 [Source:HGNC Symbol;Acc:21064]                                                                                 | chr14 | 100842755 | 100996040 | 724           | 0.196    | 1        | 1         | 1.683E-02 | 2.867E-02 | PG-BT      |
| PAF2P     | M-phase promoting factor 2 [Source:HGNC Symbol;Acc:26776]                                                                          | chr5  | 78973943  | 78982471  | 729           | 0.196    | 1        | 1         | 1.685E-02 | 2.870E-02 | PG-BT      |
| MRPL1     | mitochondrial ribosomal protein L1 [Source:HGNC Symbol;Acc:14275]                                                                  | chr4  | 78783674  | 78873944  | 694           | 0.196    | 1        | 1         | 1.695E-02 | 2.887E-02 | PG-BT      |
| SLX4P     | SLX4 interacting protein [Source:HGNC Symbol;Acc:16225]                                                                            | chr20 | 10415951  | 10617477  | 1469          | 0.532    | 2        | 2         | 1.695E-02 | 2.887E-02 | PG-BT      |
| SORT1     | soritin 1 [Source:HGNC Symbol;Acc:11165]                                                                                           | chr1  | 10962152  | 109940573 | 564           | 0.197    | 1        | 1         | 1.698E-02 | 2.870E-02 | PG-BT      |
| DYNC11    | dynein, cytoplasmic 1, intermediate chain 1 [Source:HGNC Symbol;Acc:2963]                                                          | chr1  | 95419866  | 95482208  | 2603          | 0.928    | 2        | 2         | 1.703E-02 | 2.876E-02 | PG-BT      |
| DEPDC1B   | DEP domain containing 1B [Source:HGNC Symbol;Acc:24902]                                                                            | chr5  | 59982739  | 59996017  | 731           | 0.197    | 1        | 1         | 1.704E-02 | 2.873E-02 | PG-BT      |
| SPASTN    | spastin [Source:HGNC Symbol;Acc:11233]                                                                                             | chr2  | 32288880  | 32382706  | 689           | 0.197    | 1        | 1         | 1.705E-02 | 2.873E-02 | PG-BT      |
| PFM1A     | peptidase domain containing associated with muscle regeneration 1 [Source:HGNC Symbol;Acc:24554]                                   | chr11 | 33253370  | 33551948  | 568           | 0.197    | 1        | 1         | 1.705E-02 | 2.873E-02 | PG-BT      |
| PIWIL4    | piwi-like RNA-mediated gene silencing factor 4 [Source:HGNC Symbol;Acc:18444]                                                      | chr5  | 48277028  | 48438499  | 564           | 0.197    | 1        | 1         | 1.705E-02 | 2.873E-02 | PG-BT      |
| GABPB1    | GA binding protein transcription factor, beta subunit 1 [Source:HGNC Symbol;Acc:4074]                                              | chr15 | 50569389  | 50647605  | 567           | 0.197    | 1        | 1         | 1.706E-02 | 2.874E-02 | PG-BT      |
| NIPBL     | Nipped-B homolog (Drosophila) [Source:HGNC Symbol;Acc:28862]                                                                       | chr5  | 38878681  | 39706515  | 1982          | 0.534    | 2        | 2         | 1.711E-02 | 2.878E-02 | PG-BT      |
| KIF13A    | kinesin family member 13A [Source:HGNC Symbol;Acc:14566]                                                                           | chr6  | 17759414  | 17897564  | 1555          | 0.534    | 2        | 2         | 1.711E-02 | 2.878E-02 | PG-BT      |
| NBPFL3P   | neural precursor cell expressed, developmentally down-regulated 3, pseudogene [Source:HGNC Symbol;Acc:31995]                       | chr1  | 14640368  | 14696196  | 567           | 0.197    | 1        | 1         | 1.715E-02 | 2.882E-02 | PG-BT      |
| CPOX      | corophorphyrin oxidase [Source:HGNC Symbol;Acc:2321]                                                                               | chr7  | 98239976  | 98312567  | 643           | 0.198    | 1        | 1         | 1.716E-02 | 2.884E-02 | PG-BT      |
| CDK15     | cyclin-dependent kinase 15 [Source:HGNC Symbol;Acc:14434]                                                                          | chr2  | 202655184 | 202760273 | 692           | 0.198    | 1        | 1         | 1.718E-02 | 2.884E-02 | PG-BT      |
| MFPOHSPH9 | M-phase phosphoprotein 9 [Source:HGNC Symbol;Acc:7215]                                                                             | chr12 | 123638687 | 123728561 | 517           | 0.198    | 1        | 1         | 1.719E-02 | 2.884E-02 | PG-BT      |
| SMAD1     | SMAD family member 1 [Source:HGNC Symbol;Acc:876]                                                                                  | chr10 | 146402346 | 146484207 | 700           | 0.198    | 1        | 1         | 1.723E-02 | 2.895E-02 | PG-BT      |
| ANKIB1    | ankyrin repeat and IBR domain containing 1 [Source:HGNC Symbol;Acc:22215]                                                          | chr7  | 91875548  | 92030698  | 1443          | 0.536    | 2        | 1         | 1.725E-02 | 2.890E-02 | PG-BT      |
| JMY       | junction mediating and regulatory protein, p53 cofactor [Source:HGNC Symbol;Acc:28916]                                             | chr5  | 78532012  | 78623038  | 736           | 0.198    | 1        | 1         | 1.725E-02 | 2.890E-02 | PG-BT      |
| HEPHL1    | hephastin-like 1 [Source:HGNC Symbol;Acc:30477]                                                                                    | chr7  | 93754527  | 93846917  | 572           | 0.198    | 1        | 1         | 1.728E-02 | 2.892E-02 | PG-BT      |
| CCDC138   | coiled-coil domain containing 138 [Source:HGNC Symbol;Acc:26531]                                                                   | chr11 | 109403123 | 109433024 | 695           | 0.199    | 1        | 1         | 1.732E-02 | 2.896E-02 | PG-BT      |
| FBXL5     | F-box and leucine-rich repeat protein 5 [Source:HGNC Symbol;Acc:13602]                                                             | chr4  | 15606162  | 15683302  | 702           | 0.199    | 1        | 1         | 1.732E-02 | 2.896E-02 | PG-BT      |
| BZW2      | basic leucine zipper and WD2 domains 2 [Source:HGNC Symbol;Acc:18808]                                                              | chr7  | 16685756  | 16746148  | 536           | 0.199    | 1        | 1         | 1.737E-02 | 2.902E-02 | PG-BT      |
| FOLH1     | foliate hydrolase (prostate-specific membrane antigen) 1 [Source:HGNC Symbol;Acc:3788]                                             | chr11 | 49188187  | 49253222  | 574           | 0.199    | 1        | 1         | 1.739E-02 | 2.905E-02 | PG-BT      |
| GPR128    | G-protein coupled receptor 128 [Source:HGNC Symbol;Acc:26197]                                                                      | chr11 | 66511922  | 66610987  | 716           | 0.200    | 1        | 1         | 1.750E-02 | 2.918E-02 | PG-BT      |
| SASH1     | SAM and SH3 domain containing 1 [Source:HGNC Symbol;Acc:19182]                                                                     | chr6  | 148593440 | 148873186 | 1568          | 0.539    | 2        | 1         | 1.749E-02 | 2.917E-02 | PG-BT      |
| C11orf80  | chromosome 11 open reading frame 80 [Source:HGNC Symbol;Acc:26197]                                                                 | chr11 | 66511922  | 66610987  | 716           | 0.200    | 1        | 1         | 1.750E-02 | 2.918E-02 | PG-BT      |
| E2F3      | E2F transcription factor 3 [Source:HGNC Symbol;Acc:3115]                                                                           | chr6  | 20420398  | 20493941  | 582           | 0.200    | 1        | 1         | 1.751E-02 | 2.918E-02 | PG-BT      |
| ANKRD36B  | ankyrin repeat domain containing 36B [Source:HGNC Symbol;Acc:20333]                                                                | chr6  | 28108978  | 28193897  | 622           | 0.201    | 1        | 1         | 1.752E-02 | 2.919E-02 | PG-BT      |
| HRGHEF11  | Rho guanine nucleotide exchange factor (GEF) 11 [Source:HGNC Symbol;Acc:14580]                                                     | chr1  | 156904632 | 157015162 | 596           | 0.201    | 1        | 1         | 1.767E-02 | 2.942E-02 | PG-BT      |
| PRSS12    | protease, serine, 12 (neutrophin, motapsin) [Source:HGNC Symbol;Acc:9477]                                                          | chr4  | 119201193 | 119274158 | 710           | 0.201    | 1        | 1         | 1.769E-02 | 2.943E-02 | PG-BT      |
| TNKS2     | tenascin, TRF1-interacting ankyrin-related ADP-ribosyl polymerase 2 [Source:HGNC Symbol;Acc:15677]                                 | chr10 | 93558069  | 93629033  | 564           | 0.201    | 1        | 1         | 1.773E-02 | 2.947E-02 | PG-BT      |
| WDOR1     | WD repeat domain 1 [Source:HGNC Symbol;Acc:13831]                                                                                  | chr9  | 122510887 | 122610887 | 594           | 0.202    | 1        | 1         | 1.784E-02 | 2.947E-02 | PG-BT      |
| ATP8B5P   | ATPase, class I, type 8B, member 5, pseudogene [Source:HGNC Symbol;Acc:27245]                                                      | chr9  | 35407652  | 35483026  | 538           | 0.202    | 1        | 1         | 1.782E-02 | 2.957E-02 | PG-BT      |
| IARS      | isoleucyl-tRNA synthetase [Source:HGNC Symbol;Acc:5330]                                                                            | chr9  | 94972489  | 95056038  | 538           | 0.202    | 1        | 1         | 1.782E-02 | 2.957E-02 | PG-BT      |
| MPS27     | mitochondrial ribosomal protein S27 [Source:HGNC Symbol;Acc:14512]                                                                 | chr5  | 71515236  | 71618473  | 749           | 0.202    | 1        | 1         | 1.783E-02 | 2.957E-02 | PG-BT      |
| CEPPT1    | centrosomal protein 57kDa-like 1 [Source:HGNC Symbol;Acc:13811]                                                                    | chr5  | 109416313 | 109495165 | 598           | 0.203    | 1        | 1         | 1.785E-02 | 2.959E-02 | PG-BT      |
| AR5J      | arylsulfatase family, member J [Source:HGNC Symbol;Acc:26286]                                                                      | chr4  | 114821440 | 114900883 | 716           | 0.203    | 1        | 1         | 1.797E-02 | 2.977E-02 | PG-BT      |
| NR2C2     | nuclear receptor subfamily 2, group C, member 2 [Source:HGNC Symbol;Acc:7972]                                                      | chr3  | 14898091  | 15095107  | 660           | 0.203    | 1        | 1         | 1.802E-02 | 2.984E-02 | PG-BT      |
| PPFR14C   | paraspeckle component 1 [Source:HGNC Symbol;Acc:20320]                                                                             | chr13 | 20248986  | 20357142  | 837           | 0.203    | 1        | 1         | 1.805E-02 | 2.988E-02 | PG-BT      |
| TMED3     | transmembrane emp24 protein transport domain containing 3 [Source:HGNC Symbol;Acc:28889]                                           | chr15 | 15044212  | 150914423 | 593           | 0.204    | 1        | 1         | 1.813E-02 | 2.992E-02 | PG-BT      |
| DPY5      | dihydropyrimidinase [Source:HGNC Symbol;Acc:3013]                                                                                  | chr15 | 79603404  | 79704334  | 586           | 0.204    | 1        | 1         | 1.815E-02 | 3.000E-02 | PG-BT      |
| MFSD1     | major facilitator superfamily domain containing 1 [Source:HGNC Symbol;Acc:25874]                                                   | chr3  | 15844987  | 15854708  | 666           | 0.205    | 1        | 1         | 1.821E-02 | 3.009E-02 | PG-BT      |
| CLCN6     | chloride channel, voltage-sensitive 6 [Source:HGNC Symbol;Acc:20323]                                                               | chr1  | 49838225  | 49893822  | 523           | 0.205    | 1        | 1         | 1.830E-02 | 3.026E-02 | PG-BT      |
| EIF4G3    | eukaryotic translation initiation factor 4 gamma 3, [Source:HGNC Symbol;Acc:3298]                                                  | chr1  | 21132963  | 21503377  | 2799          | 0.994    | 3        | 1         | 1.833E-02 | 3.06      |            |

table S2. Genes with significant transposon integrations in RKO BRAF<sup>WT</sup> cells after selection in low glucose medium

| Gene ID        | Description                                                                                                                   | Chrom | Start     | End       | # TAA sites | Expected | Observed | Libraries | P         | FDR       | Transposon |
|----------------|-------------------------------------------------------------------------------------------------------------------------------|-------|-----------|-----------|-------------|----------|----------|-----------|-----------|-----------|------------|
| FAR1           | fatty acyl CoA reductase 1 [Source:HGNC Symbol;Acc:26222]                                                                     | chr11 | 13690217  | 13753893  | 636         | 0.221    | 1        | 1         | 2.105E-02 | 3.357E-02 | PB-GT      |
| REST           | REST co-repressor 1 [Source:HGNC Symbol;Acc:17441]                                                                            | chr11 | 103058068 | 103179913 | 816         | 0.221    | 1        | 1         | 2.116E-02 | 3.376E-02 | PB-GT      |
| EFHC2          | EF-hand domain (C-terminal) containing 2 [Source:HGNC Symbol;Acc:26233]                                                       | chrX  | 44007128  | 44202923  | 1329        | 0.221    | 1        | 1         | 2.118E-02 | 3.374E-02 | PB-GT      |
| SP140          | SP140 nuclear body protein [Source:HGNC Symbol;Acc:17133]                                                                     | chr2  | 231090445 | 231223762 | 775         | 0.222    | 1        | 1         | 2.122E-02 | 3.378E-02 | PB-GT      |
| WDR19          | WD repeat domain 19 [Source:HGNC Symbol;Acc:18340]                                                                            | chr4  | 39184024  | 39287430  | 783         | 0.222    | 1        | 1         | 2.123E-02 | 3.378E-02 | PB-GT      |
| CYTH3          | cytochrome 3 [Source:HGNC Symbol;Acc:5047]                                                                                    | chr7  | 62014407  | 6312275   | 598         | 0.222    | 1        | 1         | 2.126E-02 | 3.387E-02 | PB-GT      |
| KPNA1          | karyopherin alpha 1 (importin alpha 5) [Source:HGNC Symbol;Acc:6394]                                                          | chr3  | 122140796 | 122233792 | 723         | 0.222    | 1        | 1         | 2.135E-02 | 3.395E-02 | PB-GT      |
| TLK1           | tousled-like kinase 1 [Source:HGNC Symbol;Acc:11841]                                                                          | chr2  | 171847333 | 17207824  | 2036        | 0.582    | 2        | 1         | 2.140E-02 | 3.400E-02 | PB-GT      |
| PPP2R5A        | protein phosphatase 2, regulatory subunit B', alpha [Source:HGNC Symbol;Acc:9309]                                             | chr1  | 212458879 | 212536200 | 629         | 0.223    | 1        | 1         | 2.149E-02 | 3.416E-02 | PB-GT      |
| PPP2R2         | phosphatidylinositol 3-kinase-related protein 2 [Source:HGNC Symbol;Acc:9467]                                                 | chr12 | 187433396 | 18834581  | 442         | 0.224    | 1        | 1         | 2.179E-02 | 3.450E-02 | PB-GT      |
| RNF144A        | ringer finger protein 144A [Source:HGNC Symbol;Acc:20457]                                                                     | chr2  | 7057523   | 7208417   | 783         | 0.224    | 1        | 1         | 2.182E-02 | 3.430E-02 | PB-GT      |
| ZCCHC6         | zinc finger, CCHC domain containing 6 [Source:HGNC Symbol;Acc:25817]                                                          | chr9  | 88902648  | 88969369  | 598         | 0.224    | 1        | 1         | 2.189E-02 | 3.439E-02 | PB-GT      |
| NFIB           | nuclear factor I/B [Source:HGNC Symbol;Acc:7785]                                                                              | chr9  | 14081842  | 14398982  | 2780        | 1.043    | 3        | 1         | 2.172E-02 | 3.442E-02 | PB-GT      |
| ORF42          | orf42 [Source:HGNC Symbol;Acc:14471]                                                                                          | chr1  | 20296931  | 20296931  | 629         | 0.225    | 1        | 1         | 2.179E-02 | 3.450E-02 | PB-GT      |
| KDM5B          | lysine (K)-specific demethylase 5B [Source:HGNC Symbol;Acc:18039]                                                             | chr1  | 202896526 | 202778588 | 634         | 0.225    | 1        | 1         | 2.183E-02 | 3.455E-02 | PB-GT      |
| NRG2           | neuregulin 2 [Source:HGNC Symbol;Acc:7998]                                                                                    | chr5  | 139226364 | 139422884 | 836         | 0.225    | 1        | 1         | 2.187E-02 | 3.460E-02 | PB-GT      |
| KIAA1715       | KIAA1715 [Source:HGNC Symbol;Acc:21610]                                                                                       | chr2  | 176786620 | 176897567 | 789         | 0.226    | 1        | 1         | 2.193E-02 | 3.467E-02 | PB-GT      |
| CALD1          | caldesmon 1 [Source:HGNC Symbol;Acc:14417]                                                                                    | chr1  | 134429003 | 134559811 | 629         | 0.228    | 1        | 1         | 2.228E-02 | 3.512E-02 | PB-GT      |
| GPR133         | G protein-coupled receptor 133 [Source:HGNC Symbol;Acc:19893]                                                                 | chr12 | 131438452 | 131620114 | 592         | 0.227    | 1        | 1         | 2.212E-02 | 3.492E-02 | PB-GT      |
| TMEM192        | transmembrane protein 192 [Source:HGNC Symbol;Acc:26775]                                                                      | chr4  | 165997230 | 166129701 | 801         | 0.227    | 1        | 1         | 2.214E-02 | 3.494E-02 | PB-GT      |
| TMEM56         | transmembrane protein 56 [Source:HGNC Symbol;Acc:26477]                                                                       | chr1  | 95582894  | 95663163  | 641         | 0.228    | 1        | 1         | 2.228E-02 | 3.512E-02 | PB-GT      |
| UGCC           | ubiquitin-specific protease 3 [Source:HGNC Symbol;Acc:15691]                                                                  | chr20 | 33999944  | 33999944  | 628         | 0.228    | 1        | 1         | 2.228E-02 | 3.512E-02 | PB-GT      |
| ARHGFE3        | Rho guanine nucleotide exchange factor (GEF) 3 [Source:HGNC Symbol;Acc:683]                                                   | chr3  | 56761446  | 57113357  | 1923        | 0.592    | 2        | 2         | 2.229E-02 | 3.512E-02 | PB-GT      |
| DOCK11         | dedicator of cytokinesis 11 [Source:HGNC Symbol;Acc:23483]                                                                    | chrX  | 117629861 | 117820126 | 1367        | 0.228    | 1        | 1         | 2.232E-02 | 3.514E-02 | PB-GT      |
| FLNB           | filamin B, beta [Source:HGNC Symbol;Acc:3755]                                                                                 | chr3  | 57994127  | 58157982  | 742         | 0.228    | 1        | 1         | 2.241E-02 | 3.525E-02 | PB-GT      |
| TGFB2          | transforming growth factor, beta 2 [Source:HGNC Symbol;Acc:11768]                                                             | chr1  | 218519577 | 218706911 | 643         | 0.229    | 1        | 1         | 2.241E-02 | 3.525E-02 | PB-GT      |
| C2orf196       | chromosome 2 open reading frame 196 [Source:HGNC Symbol;Acc:26318]                                                            | chr20 | 8710309   | 8944558   | 631         | 0.229    | 1        | 1         | 2.247E-02 | 3.534E-02 | PB-GT      |
| ITGA2          | integrin, alpha 2 (CD49B, alpha 2 subunit of VLA-2 receptor) [Source:HGNC Symbol;Acc:6137]                                    | chr5  | 52285156  | 52390609  | 849         | 0.229    | 1        | 1         | 2.251E-02 | 3.536E-02 | PB-GT      |
| ST7-AS2        | ST7 antisense RNA 2 [Source:HGNC Symbol;Acc:16044]                                                                            | chr7  | 116712126 | 116768534 | 617         | 0.229    | 1        | 1         | 2.256E-02 | 3.543E-02 | PB-GT      |
| LMBR1          | limb region 1 homolog (mouse) [Source:HGNC Symbol;Acc:13343]                                                                  | chr7  | 156473751 | 156685924 | 1602        | 0.595    | 2        | 2         | 2.261E-02 | 3.548E-02 | PB-GT      |
| CEL4           | CELF4, Elav-like family member 4 [Source:HGNC Symbol;Acc:14015]                                                               | chr18 | 34829310  | 35144090  | 969         | 0.230    | 1        | 1         | 2.277E-02 | 3.555E-02 | PB-GT      |
| MB21D2         | MB-21 domain containing 2 [Source:HGNC Symbol;Acc:30438]                                                                      | chr3  | 192514604 | 19256700  | 747         | 0.230    | 1        | 1         | 2.289E-02 | 3.557E-02 | PB-GT      |
| DENN2D2A       | DENN/MADD domain containing 2A [Source:HGNC Symbol;Acc:22212]                                                                 | chr7  | 140218220 | 140337378 | 619         | 0.230    | 1        | 1         | 2.270E-02 | 3.557E-02 | PB-GT      |
| ZNF529         | zinc finger protein 529 [Source:HGNC Symbol;Acc:23026]                                                                        | chr19 | 37025676  | 37096174  | 436         | 0.230    | 1        | 1         | 2.274E-02 | 3.561E-02 | PB-GT      |
| C7orf63        | chromosome 7 open reading frame 63 [Source:HGNC Symbol;Acc:26107]                                                             | chr7  | 89874488  | 89940377  | 620         | 0.230    | 1        | 1         | 2.277E-02 | 3.564E-02 | PB-GT      |
| HDAC2          | histone deacetylase 2 [Source:HGNC Symbol;Acc:4853]                                                                           | chr6  | 114254192 | 114324272 | 671         | 0.230    | 1        | 1         | 2.281E-02 | 3.569E-02 | PB-GT      |
| BLM            | Bloom syndrome, RecQ helicase-like [Source:HGNC Symbol;Acc:1058]                                                              | chr15 | 91260558  | 91358859  | 663         | 0.231    | 1        | 1         | 2.283E-02 | 3.569E-02 | PB-GT      |
| LFP            | limb domain containing preferred translocation partner in lipoma [Source:HGNC Symbol;Acc:6679]                                | chr3  | 187871072 | 188009400 | 514         | 1.585    | 4        | 2         | 2.289E-02 | 3.577E-02 | PB-GT      |
| SAMD13         | steroid sulfatase domain containing 13 [Source:HGNC Symbol;Acc:24582]                                                         | chr1  | 84859408  | 84859408  | 653         | 0.232    | 1        | 1         | 2.306E-02 | 3.591E-02 | PB-GT      |
| SLC22A15       | solute carrier family 22, member 15 [Source:HGNC Symbol;Acc:20301]                                                            | chr1  | 116519119 | 116612675 | 653         | 0.232    | 1        | 1         | 2.306E-02 | 3.599E-02 | PB-GT      |
| KIAA1549L      | KIAA1549L [Source:HGNC Symbol;Acc:24836]                                                                                      | chr11 | 33566138  | 33569548  | 669         | 0.232    | 1        | 1         | 2.312E-02 | 3.607E-02 | PB-GT      |
| PKAX2          | phosphatidylinositol 4-kinase type 2 beta [Source:HGNC Symbol;Acc:18215]                                                      | chr4  | 25162263  | 25280714  | 821         | 0.232    | 1        | 1         | 2.317E-02 | 3.612E-02 | PB-GT      |
| SLC22A5        | solute carrier family 28, member 5 (retroin) [Source:HGNC Symbol;Acc:9359]                                                    | chr10 | 102993177 | 103098624 | 626         | 0.232    | 1        | 1         | 2.317E-02 | 3.612E-02 | PB-GT      |
| CTDPSL         | CTD (carboxy-terminal domain, RNA polymerase II, polypeptide A) small phosphatase-like [Source:HGNC Symbol;Acc:16800]         | chr3  | 37903451  | 38029960  | 757         | 0.233    | 1        | 1         | 2.325E-02 | 3.622E-02 | PB-GT      |
| RHOBTB3        | Rho-related BTB domain containing 3 [Source:HGNC Symbol;Acc:18757]                                                            | chr5  | 95049226  | 95106877  | 865         | 0.233    | 1        | 1         | 2.330E-02 | 3.627E-02 | PB-GT      |
| HUNK           | homology up-regulated Nras-associated kinase [Source:HGNC Symbol;Acc:13326]                                                   | chr21 | 33245528  | 33416946  | 816         | 0.233    | 1        | 1         | 2.336E-02 | 3.635E-02 | PB-GT      |
| EVX2           | Evx homeobox 2 [Source:HGNC Symbol;Acc:19747]                                                                                 | chr14 | 54444499  | 57111275  | 867         | 0.234    | 1        | 1         | 2.348E-02 | 3.642E-02 | PB-GT      |
| HECTD1         | HECT domain containing E3 ubiquitin protein ligase 1 [Source:HGNC Symbol;Acc:20157]                                           | chr12 | 31569318  | 31677010  | 864         | 0.234    | 1        | 1         | 2.352E-02 | 3.655E-02 | PB-GT      |
| MARCH11        | membrane-associated ring finger (CHCH4) 11 [Source:HGNC Symbol;Acc:33609]                                                     | chr5  | 18067248  | 18168071  | 872         | 0.235    | 1        | 1         | 2.365E-02 | 3.673E-02 | PB-GT      |
| CUL2           | cullin 2 [Source:HGNC Symbol;Acc:25522]                                                                                       | chr10 | 35239479  | 35379570  | 660         | 0.236    | 1        | 1         | 2.375E-02 | 3.687E-02 | PB-GT      |
| PTPN22         | protein tyrosine phosphatase, non-receptor type 2 [Source:HGNC Symbol;Acc:25172]                                              | chr1  | 127854877 | 128299462 | 984         | 0.236    | 1        | 1         | 2.388E-02 | 3.702E-02 | PB-GT      |
| TARBP1         | TAR (HIV-1) RNA binding protein 1 [Source:HGNC Symbol;Acc:11566]                                                              | chr1  | 234527059 | 234614849 | 666         | 0.236    | 1        | 1         | 2.391E-02 | 3.708E-02 | PB-GT      |
| FREM3          | FRAS1 related extracellular matrix 3 [Source:HGNC Symbol;Acc:25172]                                                           | chr4  | 144498455 | 144621828 | 839         | 0.238    | 1        | 1         | 2.412E-02 | 3.736E-02 | PB-GT      |
| DDHD1          | DDHD domain containing 1 [Source:HGNC Symbol;Acc:19714]                                                                       | chr14 | 53510686  | 53620000  | 876         | 0.238    | 1        | 1         | 2.413E-02 | 3.736E-02 | PB-GT      |
| ZNF236         | zinc finger protein 236 [Source:HGNC Symbol;Acc:30028]                                                                        | chr1  | 74534563  | 74589963  | 692         | 0.238    | 1        | 1         | 2.423E-02 | 3.742E-02 | PB-GT      |
| GALNT11        | UDP-N-acetyl-alpha-D-galactosamine polypeptide N-acetylglucosaminyltransferase 11 (GalNAc-T11) [Source:HGNC Symbol;Acc:19714] | chr7  | 151722759 | 151819265 | 641         | 0.238    | 1        | 1         | 2.421E-02 | 3.747E-02 | PB-GT      |
| ASPH           | aspartate beta-hydroxylase [Source:HGNC Symbol;Acc:757]                                                                       | chr8  | 62413116  | 62627155  | 1784        | 0.611    | 2        | 2         | 2.424E-02 | 3.748E-02 | PB-GT      |
| AHD2           | ahydrolyase domain containing 2 [Source:HGNC Symbol;Acc:18717]                                                                | chr15 | 89630690  | 89745591  | 685         | 0.238    | 1        | 1         | 2.425E-02 | 3.748E-02 | PB-GT      |
| BTBD10         | BTB (POZ) domain containing 10 [Source:HGNC Symbol;Acc:21445]                                                                 | chr1  | 13409548  | 13429548  | 697         | 0.238    | 1        | 1         | 2.428E-02 | 3.751E-02 | PB-GT      |
| ZNF83          | zinc finger protein 83 [Source:HGNC Symbol;Acc:13158]                                                                         | chr19 | 53097313  | 53193749  | 452         | 0.239    | 1        | 1         | 2.430E-02 | 3.753E-02 | PB-GT      |
| SEPT9          | septin 9 [Source:HGNC Symbol;Acc:7323]                                                                                        | chr17 | 75276651  | 75496878  | 471         | 0.239    | 1        | 1         | 2.431E-02 | 3.753E-02 | PB-GT      |
| PROS1          | prostate cancer associated 1 [Source:HGNC Symbol;Acc:9456]                                                                    | chr3  | 93591881  | 93692910  | 776         | 0.239    | 1        | 1         | 2.434E-02 | 3.754E-02 | PB-GT      |
| FAM58          | family 58, member 8 [Source:HGNC Symbol;Acc:137446]                                                                           | chr1  | 177140633 | 177251633 | 673         | 0.239    | 1        | 1         | 2.438E-02 | 3.758E-02 | PB-GT      |
| NF2            | neurofibromin 2 (merlin) [Source:HGNC Symbol;Acc:7773]                                                                        | chr22 | 20999545  | 20994587  | 479         | 0.239    | 1        | 1         | 2.445E-02 | 3.768E-02 | PB-GT      |
| ZNF573         | zinc finger protein 573 [Source:HGNC Symbol;Acc:26420]                                                                        | chr3  | 38226734  | 38307940  | 454         | 0.240    | 1        | 1         | 2.450E-02 | 3.772E-02 | PB-GT      |
| ADAM19         | ADAM metalloproteinase domain 19 [Source:HGNC Symbol;Acc:197]                                                                 | chr5  | 158822542 | 16007783  | 889         | 0.240    | 1        | 1         | 2.450E-02 | 3.772E-02 | PB-GT      |
| PKC3A1         | protein kinase C-3 kinase adaptor protein 1 [Source:HGNC Symbol;Acc:30034]                                                    | chr7  | 86353069  | 86394271  | 672         | 0.240    | 1        | 1         | 2.450E-02 | 3.772E-02 | PB-GT      |
| C7orf55-LUC7L2 | C7orf55-LUC7L2 readthrough [Source:HGNC Symbol;Acc:44671]                                                                     | chr7  | 139025105 | 139108198 | 648         | 0.241    | 1        | 1         | 2.470E-02 | 3.796E-02 | PB-GT      |
| FSIP2          | fibrous sheath interacting protein 2 [Source:HGNC Symbol;Acc:21675]                                                           | chr2  | 186603355 | 186669187 | 846         | 0.242    | 1        | 1         | 2.495E-02 | 3.834E-02 | PB-GT      |
| PPP1R12A       | protein phosphatase 1, regulatory subunit 12A [Source:HGNC Symbol;Acc:7618]                                                   | chr12 | 80167343  | 80329240  | 1618        | 0.619    | 2        | 2         | 2.508E-02 | 3.855E-02 | PB-GT      |
| STAR2D         | STAR2 (STAR) domain containing 9 [Source:HGNC Symbol;Acc:19162]                                                               | chr1  | 42876857  | 42949179  | 628         | 0.242    | 1        | 1         | 2.503E-02 | 3.855E-02 | PB-GT      |
| STX18          | syntaxin 18 [Source:HGNC Symbol;Acc:15942]                                                                                    | chr4  | 44174669  | 44544703  | 859         | 0.243    | 1        | 1         | 2.519E-02 | 3.865E-02 | PB-GT      |
| DDX80          | DEAD (Asp-Glu-Ala-Asp) box polypeptide 80 [Source:HGNC Symbol;Acc:25542]                                                      | chr4  | 169137444 | 169293858 | 860         | 0.243    | 1        | 1         | 2.524E-02 | 3.871E-02 | PB-GT      |
| SPRN           | shed of prion protein homolog (zebrafish) [Source:HGNC Symbol;Acc:18871]                                                      | chr10 | 13523170  | 135382916 | 683         | 0.244    | 1        | 1         | 2.529E-02 | 3.875E-02 | PB-GT      |
| PHOXK          | phoxk, protein tyrosine phosphatase homolog, X-linked [Source:HGNC Symbol;Acc:8918]                                           | chr1  | 22095929  | 22095929  | 1463        | 0.244    | 1        | 1         | 2.529E-02 | 3.875E-02 | PB-GT      |
| ITGAV          | integrin, alpha V [Source:HGNC Symbol;Acc:6150]                                                                               | chr2  | 187454792 | 187545628 | 853         | 0.244    | 1        | 1         | 2.533E-02 | 3.878E-02 | PB-GT      |
| NLRP1          | NLR family, pyrin domain containing 1 [Source:HGNC Symbol;Acc:14374]                                                          | chr17 | 5402747   | 5522744   | 482         | 0.244    | 1        | 1         | 2.537E-02 | 3.882E-02 | PB-GT      |
| FANCL          | Fanconi anemia, complementation group 1 [Source:HGNC Symbol;Acc:20748]                                                        | chr2  | 58386378  | 58468507  | 854         | 0.244    | 1        | 1         | 2.538E-02 | 3.882E-02 | PB-GT      |

table S2. Genes with significant transposon integrations in RKO BRAF<sup>WT</sup> cells after selection in low glucose medium

| Gene ID    | Description                                                                                                                         | Chrom | Start     | End       | # TTAAs sites | Expected | Observed | Libraries | P         | FDR       | Transposon |
|------------|-------------------------------------------------------------------------------------------------------------------------------------|-------|-----------|-----------|---------------|----------|----------|-----------|-----------|-----------|------------|
| BAZ1A      | bromodomain adjacent to zinc finger domain, 1A [Source:HGNC Symbol:Acc:960]                                                         | chr14 | 35221937  | 35344853  | 963           | 0.261    | 1        | 1         | 2.87E-02  | 4.25E-02  | PB-GT      |
| TEC        | tear protein tyrosine kinase [Source:HGNC Symbol:Acc:11719]                                                                         | chr1  | 48137800  | 48211981  | 925           | 0.262    | 1        | 1         | 2.88E-02  | 4.27E-02  | PB-GT      |
| UBR4       | ubiquitin protein ligase E3 component n-recognin 4 [Source:HGNC Symbol:Acc:30313]                                                   | chr1  | 19401000  | 19536710  | 738           | 0.262    | 1        | 1         | 2.88E-02  | 4.27E-02  | PB-GT      |
| RC3H1      | ring finger and CCHC-type domains 1 [Source:HGNC Symbol:Acc:29434]                                                                  | chr1  | 173900352 | 173991435 | 738           | 0.262    | 1        | 1         | 2.87E-02  | 4.27E-02  | PB-GT      |
| ANO10      | anoctamin 10 [Source:HGNC Symbol:Acc:25519]                                                                                         | chr3  | 43396351  | 43793086  | 2135          | 0.657    | 2        | 2         | 2.909E-02 | 4.300E-02 | PB-GT      |
| ANXA8L1    | annexin A8-like 1 [Source:HGNC Symbol:Acc:23334]                                                                                    | chr10 | 47011753  | 47174933  | 738           | 0.263    | 1        | 1         | 2.916E-02 | 4.307E-02 | PB-GT      |
| LAMA1      | laminin, alpha 1 [Source:HGNC Symbol:Acc:6481]                                                                                      | chr18 | 6941743   | 7117813   | 1100          | 0.263    | 1        | 1         | 2.917E-02 | 4.307E-02 | PB-GT      |
| SLC12A6    | solute carrier family 12 (potassium/chloride transporters), member 6 [Source:HGNC Symbol:Acc:10914]                                 | chr15 | 34525460  | 34630261  | 758           | 0.264    | 1        | 1         | 2.920E-02 | 4.310E-02 | PB-GT      |
| TXNDX16    | thioredoxin domain containing 16 [Source:HGNC Symbol:Acc:19965]                                                                     | chr14 | 52897308  | 53019240  | 973           | 0.264    | 1        | 1         | 2.926E-02 | 4.316E-02 | PB-GT      |
| TACC1      | transforming, acidic coiled-coil containing protein 1 [Source:HGNC Symbol:Acc:11522]                                                | chr6  | 38585704  | 38710546  | 771           | 0.264    | 1        | 1         | 2.931E-02 | 4.321E-02 | PB-GT      |
| GRAMD1C    | GRAM domain containing 1C [Source:HGNC Symbol:Acc:25522]                                                                            | chr3  | 11547029  | 113666021 | 860           | 0.265    | 1        | 1         | 2.939E-02 | 4.331E-02 | PB-GT      |
| PPAPDC1A   | phosphatidic acid phosphatase type 2 domain containing 1A [Source:HGNC Symbol:Acc:23531]                                            | chr10 | 122216466 | 122349367 | 742           | 0.265    | 1        | 1         | 2.945E-02 | 4.334E-02 | PB-GT      |
| DNMBP      | dynamitin binding protein [Source:HGNC Symbol:Acc:30373]                                                                            | chr10 | 101635334 | 101768676 | 742           | 0.265    | 1        | 1         | 2.945E-02 | 4.334E-02 | PB-GT      |
| TFPI       | tissue factor pathway inhibitor (lipoprotein-associated coagulation inhibitor) [Source:HGNC Symbol:Acc:11760]                       | chr2  | 198328957 | 198430487 | 927           | 0.265    | 1        | 1         | 2.950E-02 | 4.334E-02 | PB-GT      |
| DFYF       | dyfyerlin, limb girdle muscular dystrophy 2B (autosomal recessive) [Source:HGNC Symbol:Acc:3097]                                    | chr2  | 71680852  | 71913898  | 927           | 0.265    | 1        | 1         | 2.950E-02 | 4.334E-02 | PB-GT      |
| SP4        | Sp4 transcription factor [Source:HGNC Symbol:Acc:11209]                                                                             | chr7  | 21467652  | 21554440  | 714           | 0.265    | 1        | 1         | 2.951E-02 | 4.334E-02 | PB-GT      |
| SGCE       | sarcoglycan, epsilon [Source:HGNC Symbol:Acc:10808]                                                                                 | chr7  | 94214542  | 94285251  | 714           | 0.265    | 1        | 1         | 2.951E-02 | 4.334E-02 | PB-GT      |
| TPO52      | tumor protein D52 [Source:HGNC Symbol:Acc:12005]                                                                                    | chr6  | 80215214  | 80303874  | 773           | 0.266    | 1        | 1         | 2.959E-02 | 4.336E-02 | PB-GT      |
| MBNL1      | muscleblind-like splicing regulator 1 [Source:HGNC Symbol:Acc:6923]                                                                 | chr3  | 151961617 | 152183669 | 2148          | 0.661    | 2        | 2         | 2.954E-02 | 4.335E-02 | PB-GT      |
| ETS1       | v-ets erythroblastosis virus E26 oncogene homolog 1 (avian) [Source:HGNC Symbol:Acc:3448]                                           | chr11 | 128328656 | 128457437 | 765           | 0.265    | 1        | 1         | 2.968E-02 | 4.336E-02 | PB-GT      |
| MTRMR2     | myotubularin related protein 2 [Source:HGNC Symbol:Acc:7450]                                                                        | chr11 | 95566046  | 95658479  | 765           | 0.265    | 1        | 1         | 2.968E-02 | 4.336E-02 | PB-GT      |
| SNX14      | sorting nexin 14 [Source:HGNC Symbol:Acc:14619]                                                                                     | chr6  | 86201521  | 86303874  | 773           | 0.266    | 1        | 1         | 2.969E-02 | 4.336E-02 | PB-GT      |
| NOS1AP     | nitric oxide synthase 1 (neuronal) adaptor protein [Source:HGNC Symbol:Acc:16859]                                                   | chr1  | 162035564 | 162353321 | 1568          | 0.663    | 2        | 2         | 2.981E-02 | 4.365E-02 | PB-GT      |
| OTX2-AS1   | OTX2 antisense RNA 1 (head to head) [Source:HGNC Symbol:Acc:43906]                                                                  | chr14 | 57279901  | 57618985  | 2447          | 0.664    | 2        | 2         | 2.987E-02 | 4.371E-02 | PB-GT      |
| SLC9C2     | solute carrier family 9, member C2 (putative) [Source:HGNC Symbol:Acc:28664]                                                        | chr1  | 173469003 | 173572233 | 762           | 0.267    | 1        | 1         | 2.988E-02 | 4.371E-02 | PB-GT      |
| GBA3       | glucosyl beta-3-galactosidase [Source:HGNC Symbol:Acc:19069]                                                                        | chr1  | 22689537  | 22824189  | 943           | 0.267    | 1        | 1         | 2.989E-02 | 4.371E-02 | PB-GT      |
| LRKK1      | leucine-rich repeat kinase 1 [Source:HGNC Symbol:Acc:18608]                                                                         | chr15 | 101459420 | 101610317 | 768           | 0.267    | 1        | 1         | 2.991E-02 | 4.371E-02 | PB-GT      |
| UBE2W      | ubiquitin-conjugating enzyme E2W (putative) [Source:HGNC Symbol:Acc:25616]                                                          | chr8  | 74692332  | 74791145  | 781           | 0.268    | 1        | 1         | 3.001E-02 | 4.383E-02 | PB-GT      |
| MSH2       | mutS homolog 2, colon cancer, non-polyposis type 1 (E. coli) [Source:HGNC Symbol:Acc:7325]                                          | chr2  | 47630108  | 47789450  | 937           | 0.268    | 1        | 1         | 3.009E-02 | 4.392E-02 | PB-GT      |
| CNST       | cornutin, cornixin storage protein [Source:HGNC Symbol:Acc:26486]                                                                   | chr1  | 246729746 | 246831886 | 755           | 0.268    | 1        | 1         | 3.010E-02 | 4.392E-02 | PB-GT      |
| ZNF470     | zinc finger protein 470 [Source:HGNC Symbol:Acc:26167]                                                                              | chr1  | 247210849 | 247422113 | 756           | 0.268    | 1        | 1         | 3.017E-02 | 4.401E-02 | PB-GT      |
| REER       | arginine-glutamic acid dipeptide (RE) repeats [Source:HGNC Symbol:Acc:9965]                                                         | chr1  | 84124567  | 8477702   | 3261          | 1.158    | 3        | 3         | 3.021E-02 | 4.404E-02 | PB-GT      |
| FILIP1L    | filamin A interacting protein 1-like [Source:HGNC Symbol:Acc:24589]                                                                 | chr3  | 99548985  | 99633357  | 2171          | 0.668    | 2        | 2         | 3.035E-02 | 4.421E-02 | PB-GT      |
| TDRD5      | tumor domain containing 5 [Source:HGNC Symbol:Acc:20614]                                                                            | chr1  | 17950748  | 179604007 | 760           | 0.270    | 1        | 1         | 3.047E-02 | 4.437E-02 | PB-GT      |
| MEITL1L6   | methyltransferase like 6 [Source:HGNC Symbol:Acc:29494]                                                                             | chr1  | 15118343  | 15145185  | 933           | 0.271    | 1        | 1         | 3.051E-02 | 4.440E-02 | PB-GT      |
| TRRAP      | transformation/transcription domain-associated protein [Source:HGNC Symbol:Acc:12347]                                               | chr7  | 98475556  | 98610866  | 728           | 0.270    | 1        | 1         | 3.058E-02 | 4.444E-02 | PB-GT      |
| GCNT2      | glucosaminyl (N-acetyl) transferase 2, l-branching enzyme (l blood group) [Source:HGNC Symbol:Acc:4204]                             | chr6  | 10492456  | 10629801  | 787           | 0.270    | 1        | 1         | 3.068E-02 | 4.444E-02 | PB-GT      |
| UBAP2      | ubiquitin associated protein 2 [Source:HGNC Symbol:Acc:14185]                                                                       | chr9  | 33921691  | 34095947  | 721           | 0.270    | 1        | 1         | 3.069E-02 | 4.444E-02 | PB-GT      |
| LINC41     | lincRNA intergenic homeobox domain 41 [Source:HGNC Symbol:Acc:29191]                                                                | chr1  | 48161624  | 47102621  | 2367          | 0.672    | 2        | 2         | 3.075E-02 | 4.444E-02 | PB-GT      |
| HEATR5B    | HEAT repeat containing 5B [Source:HGNC Symbol:Acc:29273]                                                                            | chr2  | 37195526  | 37311485  | 946           | 0.271    | 1        | 1         | 3.062E-02 | 4.444E-02 | PB-GT      |
| TMOD3      | tropomodulin 3 (ubiquitous) [Source:HGNC Symbol:Acc:11873]                                                                          | chr15 | 62112825  | 52239492  | 778           | 0.271    | 1        | 1         | 3.066E-02 | 4.444E-02 | PB-GT      |
| ATP11C     | ATPase, class VI, type 11C [Source:HGNC Symbol:Acc:13554]                                                                           | chrX  | 138083050 | 12637932  | 1625          | 0.471    | 1        | 1         | 3.062E-02 | 4.447E-02 | PB-GT      |
| SUSD1      | sushi domain containing 1 [Source:HGNC Symbol:Acc:29413]                                                                            | chr1  | 114807938 | 114937888 | 723           | 0.271    | 1        | 1         | 3.068E-02 | 4.447E-02 | PB-GT      |
| TINAG      | tubulin-interstitial nephritis antigen [Source:HGNC Symbol:Acc:14599]                                                               | chr6  | 54172657  | 54254950  | 790           | 0.271    | 1        | 1         | 3.079E-02 | 4.461E-02 | PB-GT      |
| CUL5       | culin 5 [Source:HGNC Symbol:Acc:2556]                                                                                               | chr11 | 107879459 | 107978503 | 783           | 0.272    | 1        | 1         | 3.086E-02 | 4.469E-02 | PB-GT      |
| ESYT2      | extended syntrophin-like protein 2 [Source:HGNC Symbol:Acc:22211]                                                                   | chr7  | 158523986 | 158602944 | 732           | 0.272    | 1        | 1         | 3.088E-02 | 4.470E-02 | PB-GT      |
| TRAF       | Tumor necrosis factor-associated NF- $\kappa$ B activator [Source:HGNC Symbol:Acc:11662]                                            | chr1  | 181993419 | 182067332 | 962           | 0.272    | 1        | 1         | 3.097E-02 | 4.481E-02 | PB-GT      |
| RF3C       | replication factor C (activator 1), 3, 38kDa [Source:HGNC Symbol:Acc:9971]                                                          | chr13 | 34392186  | 34540955  | 1122          | 0.272    | 1        | 1         | 3.101E-02 | 4.483E-02 | PB-GT      |
| INTS7      | integrator complex subunit 7 [Source:HGNC Symbol:Acc:24484]                                                                         | chr1  | 212113741 | 212208844 | 769           | 0.273    | 1        | 1         | 3.110E-02 | 4.488E-02 | PB-GT      |
| NM5CZ2     | non-SMC element 2, MMS21 homolog (S. cerevisiae) [Source:HGNC Symbol:Acc:26513]                                                     | chr8  | 126103921 | 126379362 | 1971          | 0.675    | 2        | 2         | 3.120E-02 | 4.507E-02 | PB-GT      |
| FER1L6-AS2 | Fer1 antisense RNA 2 [Source:HGNC Symbol:Acc:29413]                                                                                 | chr1  | 125093314 | 125183763 | 709           | 0.274    | 1        | 1         | 3.128E-02 | 4.512E-02 | PB-GT      |
| EPB41L4B   | erythrocyte membrane protein band 4.1 like 4B [Source:HGNC Symbol:Acc:19818]                                                        | chr9  | 111934255 | 112083244 | 730           | 0.274    | 1        | 1         | 3.130E-02 | 4.517E-02 | PB-GT      |
| DNAH10     | dynein, axonemal, heavy chain 10 [Source:HGNC Symbol:Acc:29413]                                                                     | chr12 | 124247042 | 124420753 | 717           | 0.275    | 1        | 1         | 3.144E-02 | 4.535E-02 | PB-GT      |
| CCNY       | cyclin Y [Source:HGNC Symbol:Acc:23354]                                                                                             | chr10 | 35539553  | 35680852  | 1809          | 0.678    | 2        | 2         | 3.149E-02 | 4.539E-02 | PB-GT      |
| AGK        | agmatase kinase [Source:HGNC Symbol:Acc:21869]                                                                                      | chr2  | 141250968 | 141321642 | 742           | 0.275    | 1        | 1         | 3.161E-02 | 4.562E-02 | PB-GT      |
| GNAL       | guanine nucleotide binding protein (G protein), alpha activating activity polypeptide, olfactory type [Source:HGNC Symbol:Acc:9971] | chr18 | 11688955  | 11685684  | 1152          | 0.276    | 1        | 1         | 3.174E-02 | 4.570E-02 | PB-GT      |
| EIF3E      | eukaryotic translation initiation factor 3, subunit E [Source:HGNC Symbol:Acc:3277]                                                 | chr8  | 109213445 | 109447562 | 1988          | 0.680    | 2        | 2         | 3.180E-02 | 4.577E-02 | PB-GT      |
| NME7       | NME/NM23 family member 7 [Source:HGNC Symbol:Acc:20461]                                                                             | chr1  | 169110769 | 169337205 | 1917          | 0.681    | 2        | 2         | 3.181E-02 | 4.577E-02 | PB-GT      |
| PSME4      | prosome activator subunit 4 [Source:HGNC Symbol:Acc:20635]                                                                          | chr4  | 54019204  | 54197937  | 967           | 0.277    | 1        | 1         | 3.187E-02 | 4.582E-02 | PB-GT      |
| TNPO3      | transportin 3 [Source:HGNC Symbol:Acc:17103]                                                                                        | chr7  | 128594948 | 128695198 | 745           | 0.277    | 1        | 1         | 3.189E-02 | 4.583E-02 | PB-GT      |
| PUM2       | pumilio homolog 2 (Drosophila) [Source:HGNC Symbol:Acc:14958]                                                                       | chr2  | 20448452  | 20555199  | 969           | 0.277    | 1        | 1         | 3.199E-02 | 4.595E-02 | PB-GT      |
| TWIS1      | twist basic helix-loop-helix transcription factor 1 [Source:HGNC Symbol:Acc:12428]                                                  | chr7  | 19060614  | 19157295  | 748           | 0.278    | 1        | 1         | 3.212E-02 | 4.612E-02 | PB-GT      |
| TJPI       | tight junction protein 1 [Source:HGNC Symbol:Acc:11827]                                                                             | chr1  | 29915168  | 29925168  | 199           | 0.278    | 1        | 1         | 3.225E-02 | 4.627E-02 | PB-GT      |
| RBM27      | RNA binding motif protein 27 [Source:HGNC Symbol:Acc:29243]                                                                         | chr5  | 145583113 | 145718814 | 1033          | 0.278    | 1        | 1         | 3.226E-02 | 4.627E-02 | PB-GT      |
| FBXO11     | F-box protein 11 [Source:HGNC Symbol:Acc:13590]                                                                                     | chr2  | 48016455  | 48132932  | 974           | 0.279    | 1        | 1         | 3.229E-02 | 4.629E-02 | PB-GT      |
| PRCFB      | protein kinase C, beta [Source:HGNC Symbol:Acc:3995]                                                                                | chr16 | 23847322  | 24231932  | 2044          | 0.685    | 2        | 2         | 3.232E-02 | 4.630E-02 | PB-GT      |
| IQGAP1     | IQ motif containing GTPase activating protein 1 [Source:HGNC Symbol:Acc:6110]                                                       | chr1  | 150335667 | 150531450 | 813           | 0.279    | 1        | 1         | 3.235E-02 | 4.632E-02 | PB-GT      |
| JAK1       | Janus kinase 1 [Source:HGNC Symbol:Acc:6190]                                                                                        | chr1  | 65298912  | 65432187  | 788           | 0.280    | 1        | 1         | 3.254E-02 | 4.658E-02 | PB-GT      |
| KDM2A      | lysine (K)-specific demethylase 2A [Source:HGNC Symbol:Acc:13606]                                                                   | chr11 | 66888740  | 67025141  | 807           | 0.280    | 1        | 1         | 3.260E-02 | 4.665E-02 | PB-GT      |
| FBXW8      | F-box and WD repeat domain containing 8 [Source:HGNC Symbol:Acc:13597]                                                              | chr12 | 117348781 | 117488953 | 732           | 0.280    | 1        | 1         | 3.265E-02 | 4.669E-02 | PB-GT      |
| TBC1D15    | TBC1 domain family, member 15 [Source:HGNC Symbol:Acc:25694]                                                                        | chr12 | 72233487  | 72303487  | 733           | 0.281    | 1        | 1         | 3.273E-02 | 4.671E-02 | PB-GT      |
| GLS        | glutaminase [Source:HGNC Symbol:Acc:4331]                                                                                           | chr2  | 191745553 | 191830278 | 985           | 0.282    | 1        | 1         | 3.295E-02 | 4.708E-02 | PB-GT      |
| SLC06A1    | solute carrier organic anion transporter family, member 6A1 [Source:HGNC Symbol:Acc:23613]                                          | chr5  | 101707486 | 101834220 | 1046          | 0.282    | 1        | 1         | 3.300E-02 | 4.712E-02 | PB-GT      |
| CFDP1      | craniofacial development protein 1 [Source:HGNC Symbol:Acc:1873]                                                                    | chr16 | 95372796  | 95467383  | 846           | 0.283    | 1        | 1         | 3.332E-02 | 4.755E-02 | PB-GT      |
| RPRD2      | repeat of nuclear pore-mRNA domain containing 2 [Source:HGNC Symbol:Acc:29039]                                                      | chr1  | 150435567 | 150531450 | 813           | 0.284    | 1        | 1         | 3.345E-02 | 4.762E-02 | PB-GT      |
| PAM        | peptidylglycine alpha-amidating monooxygenase [Source:HGNC Symbol:Acc:8596]                                                         | chr5  | 102099685 | 102368009 | 2583          | 0.696    | 2        | 2         | 3.367E-02 | 4.801E-02 | PB-GT      |
| ADIPOR2    | adiponectin receptor 2 [Source:HGNC Symbol:Acc:24041]                                                                               | chr12 | 17977440  | 1897844   | 746           | 0.286    | 1        | 1         | 3.379E-02 | 4.816E-02 | PB-GT      |
| PLS1       | plastin 1 [Source:HGNC Symbol:Acc:3090]                                                                                             | chr3  | 142315229 | 142432506 | 929           | 0.286    | 1        | 1         | 3.383E-02 | 4.818E-02 | P          |

**table S2. Genes with significant transposon integrations in RKO BRAF<sup>wt</sup> cells after selection in low glucose medium**

| Gene ID     | Description                                                                                                              | Chrom | Start     | End       | # TTAAs sites | Expected | Observed | Libraries | P         | FDR       | Transposon |
|-------------|--------------------------------------------------------------------------------------------------------------------------|-------|-----------|-----------|---------------|----------|----------|-----------|-----------|-----------|------------|
| RNA55P18    | RNA, 5S ribosomal pseudogene 18 [Source:HGNC Symbol:Acc:42586]                                                           | 1     | 228793859 | 228798779 | 21            | 0.003    | 1        | 1         | 3.230E-06 | 8.435E-05 | PB-CAG-SD  |
| gAPOH       | glyceraldehyde 3-phosphate dehydrogenase [Source:HGNC Symbol:Acc:41411]                                                  | 12    | 26839805  | 26847573  | 22            | 0.003    | 1        | 1         | 3.238E-06 | 8.435E-05 | PB-CAG-SD  |
| RNAU6-1148P | RNA, U6 small nuclear 1148, pseudogene [Source:HGNC Symbol:Acc:48111]                                                    | 5     | 137405044 | 137410147 | 24            | 0.003    | 1        | 1         | 3.245E-06 | 8.435E-05 | PB-CAG-SD  |
| C16orf98    | chromosome 16 open reading frame 98 [Source:HGNC Symbol:Acc:45036]                                                       | 16    | 31208206  | 31214773  | 20            | 0.003    | 1        | 1         | 3.403E-06 | 8.435E-05 | PB-CAG-SD  |
| RP56K4      | ribosomal protein S6 kinase, 90kDa, polypeptide 4 [Source:HGNC Symbol:Acc:10433]                                         | 4     | 64139887  | 64139887  | 30            | 0.003    | 1        | 1         | 3.404E-06 | 8.435E-05 | PB-CAG-SD  |
| PEX2        | peroxisomal biogenesis factor 2 [Source:HGNC Symbol:Acc:3717]                                                            | 6     | 7782984   | 7782984   | 224           | 0.028    | 2        | 1         | 3.439E-06 | 8.435E-05 | PB-CAG-SD  |
| C5orf55     | chromosome 5 open reading frame 55 [Source:HGNC Symbol:Acc:25175]                                                        | 5     | 441645    | 441645    | 25            | 0.003    | 1        | 1         | 3.521E-06 | 8.435E-05 | PB-CAG-SD  |
| RNAU6-510P  | RNA, U6 small nuclear 510, pseudogene [Source:HGNC Symbol:Acc:47473]                                                     | 1     | 38452134  | 38457241  | 22            | 0.003    | 1        | 1         | 3.544E-06 | 8.435E-05 | PB-CAG-SD  |
| LDHBP2      | lactate dehydrogenase B pseudogene 2 [Source:HGNC Symbol:Acc:6543]                                                       | X     | 75552240  | 75561244  | 39            | 0.003    | 1        | 1         | 3.573E-06 | 8.435E-05 | PB-CAG-SD  |
| CTED1       | Ctbp300-interacting transactivator, with Glu/Asp-rich carboxy-terminal domain, 1 [Source:HGNC Symbol:Acc:1986]           | 1     | 29869914  | 29879371  | 22            | 0.003    | 1        | 1         | 3.575E-06 | 8.435E-05 | PB-CAG-SD  |
| HMGNP22     | high mobility group nucleosomal binding domain 2 pseudogene 22 [Source:HGNC Symbol:Acc:39387]                            | 2     | 10127612  | 10127286  | 31            | 0.003    | 1        | 1         | 3.880E-06 | 8.705E-05 | PB-CAG-SD  |
| RNAU6-795P  | RNA, U6 small nuclear 795, pseudogene [Source:HGNC Symbol:Acc:47758]                                                     | 10    | 38332801  | 38337903  | 25            | 0.003    | 1        | 1         | 4.088E-06 | 8.705E-05 | PB-CAG-SD  |
| RNA5-8SP2   | RNA, 5.8S ribosomal pseudogene 2 [Source:HGNC Symbol:Acc:41956]                                                          | 16    | 33960426  | 33965577  | 22            | 0.003    | 1        | 1         | 4.118E-06 | 8.705E-05 | PB-CAG-SD  |
| CDIPT1      | CDIPT antisense RNA 1 (head to head) [Source:HGNC Symbol:Acc:48609]                                                      | 16    | 29869914  | 29879371  | 22            | 0.003    | 1        | 1         | 4.118E-06 | 8.705E-05 | PB-CAG-SD  |
| RN7SKP121   | RNA, 7SK small nuclear pseudogene 121 [Source:HGNC Symbol:Acc:45845]                                                     | 11    | 127275923 | 127281227 | 33            | 0.003    | 1        | 1         | 4.118E-06 | 8.705E-05 | PB-CAG-SD  |
| RNU7-14P    | RNA, U7 small nuclear 14 pseudogene [Source:HGNC Symbol:Acc:34110]                                                       | 20    | 52285236  | 52290297  | 20            | 0.003    | 1        | 1         | 4.121E-06 | 8.705E-05 | PB-CAG-SD  |
| DUSP6P1     | dual specificity phosphatase 5 pseudogene 1 [Source:HGNC Symbol:Acc:32020]                                               | 1     | 228739885 | 22878150  | 24            | 0.003    | 1        | 1         | 4.218E-06 | 8.755E-05 | PB-CAG-SD  |
| CTED1       | Ctbp300-interacting transactivator, with Glu/Asp-rich carboxy-terminal domain, 1 [Source:HGNC Symbol:Acc:1986]           | 1     | 111955252 | 111962522 | 35            | 0.003    | 1        | 1         | 4.632E-06 | 9.176E-05 | PB-CAG-SD  |
| C6orf50     | chromosome 6 open reading frame 50 [Source:HGNC Symbol:Acc:23677]                                                        | 9     | 132374504 | 132388055 | 31            | 0.003    | 1        | 1         | 4.659E-06 | 9.176E-05 | PB-CAG-SD  |
| DDX39P2     | DEAD (Asp-Glu-Ala-Asp) box polypeptide 39B pseudogene 2 [Source:HGNC Symbol:Acc:33461]                                   | 6     | 29959586  | 29961382  | 31            | 0.003    | 1        | 1         | 4.731E-06 | 9.176E-05 | PB-CAG-SD  |
| SNORD101    | small nuclear RNA, C/D box 101 [Source:HGNC Symbol:Acc:32764]                                                            | 6     | 133131446 | 133136511 | 31            | 0.003    | 1        | 1         | 4.731E-06 | 9.176E-05 | PB-CAG-SD  |
| MS11        | macrophage stimulating factor 1 (hepatocytic growth factor-like) [Source:HGNC Symbol:Acc:7380]                           | 3     | 49721280  | 49731934  | 26            | 0.003    | 1        | 1         | 4.801E-06 | 9.176E-05 | PB-CAG-SD  |
| GAPDH34     | glyceraldehyde 3-phosphate dehydrogenase pseudogene 34 [Source:HGNC Symbol:Acc:37786]                                    | 13    | 37309178  | 37315000  | 37            | 0.003    | 1        | 1         | 5.000E-06 | 9.364E-05 | PB-CAG-SD  |
| C11orf31    | chromosome 11 open reading frame 31 [Source:HGNC Symbol:Acc:18251]                                                       | 11    | 57503825  | 57510986  | 37            | 0.003    | 1        | 1         | 5.176E-06 | 9.364E-05 | PB-CAG-SD  |
| SNRPN25     | small nuclear ribonucleoprotein 25kDa (U11/U12) [Source:HGNC Symbol:Acc:14161]                                           | 16    | 98010     | 107689    | 25            | 0.003    | 1        | 1         | 5.314E-06 | 9.364E-05 | PB-CAG-SD  |
| CDIPT1      | CDIPT antisense RNA 1 (head to head) [Source:HGNC Symbol:Acc:48609]                                                      | 16    | 29869914  | 29879371  | 22            | 0.003    | 1        | 1         | 5.314E-06 | 9.364E-05 | PB-CAG-SD  |
| USE1        | unconventional SNARE in the ER 1 homolog (S. cerevisiae) [Source:HGNC Symbol:Acc:30882]                                  | 19    | 17321155  | 17330638  | 15            | 0.003    | 1        | 1         | 5.327E-06 | 9.364E-05 | PB-CAG-SD  |
| CTBP2P5     | C-terminal binding protein 2 pseudogene 5 [Source:HGNC Symbol:Acc:45197]                                                 | 2     | 49142406  | 49148669  | 36            | 0.003    | 1        | 1         | 5.366E-06 | 9.364E-05 | PB-CAG-SD  |
| SNORD100    | small nuclear RNA, C/D box 100 [Source:HGNC Symbol:Acc:32763]                                                            | 6     | 131132941 | 131138106 | 34            | 0.003    | 1        | 1         | 5.690E-06 | 9.788E-05 | PB-CAG-SD  |
| RNAU6-128P  | RNA, U6 small nuclear 128, pseudogene [Source:HGNC Symbol:Acc:47091]                                                     | 4     | 159715742 | 159720848 | 39            | 0.003    | 1        | 1         | 5.905E-06 | 1.001E-04 | PB-CAG-SD  |
| MIR471-2    | MIR471-2 [Source:HGNC Symbol:Acc:47176]                                                                                  | 6     | 112262838 | 112262838 | 74            | 0.004    | 1        | 1         | 6.075E-06 | 1.003E-04 | PB-CAG-SD  |
| RNU7-158P   | RNA, U7 small nuclear 158 pseudogene [Source:HGNC Symbol:Acc:45692]                                                      | 4     | 184090501 | 184095570 | 43            | 0.004    | 1        | 1         | 7.177E-06 | 1.184E-04 | PB-CAG-SD  |
| HIST1HC     | histone cluster 1, H1c [Source:HGNC Symbol:Acc:4716]                                                                     | 6     | 26055968  | 26061999  | 39            | 0.004    | 1        | 1         | 7.484E-06 | 1.203E-04 | PB-CAG-SD  |
| ORF10K3P    | orf10k cluster, family 10, subfamily R, member 3 pseudogene [Source:HGNC Symbol:Acc:14829]                               | 1     | 158456009 | 158461950 | 32            | 0.004    | 1        | 1         | 7.493E-06 | 1.203E-04 | PB-CAG-SD  |
| MIR474      | MIR474 [Source:HGNC Symbol:Acc:47176]                                                                                    | 19    | 6989187   | 69893225  | 18            | 0.004    | 1        | 1         | 7.698E-06 | 1.203E-04 | PB-CAG-SD  |
| CA14        | carbonic anhydrase XIV [Source:HGNC Symbol:Acc:1372]                                                                     | 1     | 150224554 | 150237478 | 33            | 0.004    | 1        | 1         | 7.988E-06 | 1.227E-04 | PB-CAG-SD  |
| RAB26       | RAB26, member RAS oncogene family [Source:HGNC Symbol:Acc:14259]                                                         | 16    | 2185804   | 2204166   | 31            | 0.004    | 1        | 1         | 8.167E-06 | 1.227E-04 | PB-CAG-SD  |
| RPL22P19    | ribosomal protein L22 pseudogene 19 [Source:HGNC Symbol:Acc:36067]                                                       | 12    | 125420001 | 125425441 | 35            | 0.004    | 1        | 1         | 8.188E-06 | 1.227E-04 | PB-CAG-SD  |
| GLY1C1      | glycylglycyl-tRNA synthetase [Source:HGNC Symbol:Acc:24247]                                                              | 12    | 52316126  | 52322942  | 2             | 0.004    | 1        | 1         | 8.207E-06 | 1.227E-04 | PB-CAG-SD  |
| RNAU6-687P  | RNA, U6 small nuclear 687, pseudogene [Source:HGNC Symbol:Acc:47650]                                                     | 10    | 56212183  | 56217271  | 34            | 0.004    | 1        | 1         | 8.428E-06 | 1.227E-04 | PB-CAG-SD  |
| USP21       | ubiquitin specific peptidase 21 [Source:HGNC Symbol:Acc:12620]                                                           | 1     | 161124240 | 161135513 | 34            | 0.004    | 1        | 1         | 8.458E-06 | 1.227E-04 | PB-CAG-SD  |
| ATP5F1      | ATP synthase, H+ transporting, mitochondrial Fo complex, subunit C1 (subunit 9) [Source:HGNC Symbol:Acc:841]             | 17    | 46972327  | 46973233  | 27            | 0.004    | 1        | 1         | 8.538E-06 | 1.227E-04 | PB-CAG-SD  |
| ATP5F1P5    | ATP synthase, H+ transporting, mitochondrial Fo complex, subunit C1 (subunit 9) pseudogene 5 [Source:HGNC Symbol:Acc:35] | 13    | 107131078 | 107131078 | 27            | 0.004    | 1        | 1         | 8.561E-06 | 1.227E-04 | PB-CAG-SD  |
| SNOR43      | small nuclear RNA, H/ACA box 33 [Source:HGNC Symbol:Acc:32623]                                                           | 6     | 13133358  | 13138487  | 42            | 0.004    | 1        | 1         | 8.677E-06 | 1.228E-04 | PB-CAG-SD  |
| ATP6V1G1P4  | ATPase, H+ transporting, lysosomal 13kDa, V1 subunit G1 pseudogene 4 [Source:HGNC Symbol:Acc:3671]                       | 6     | 35402234  | 35447568  | 37            | 0.004    | 1        | 1         | 8.902E-06 | 1.228E-04 | PB-CAG-SD  |
| KRT18P13    | keratin 18 pseudogene 13 [Source:HGNC Symbol:Acc:6432]                                                                   | 9     | 100456204 | 100463016 | 43            | 0.004    | 1        | 1         | 8.958E-06 | 1.228E-04 | PB-CAG-SD  |
| NUDT19P4    | nucleoside diphosphate kinase type 19 pseudogene 4 [Source:HGNC Symbol:Acc:43588]                                        | 6     | 44881614  | 44887932  | 43            | 0.004    | 1        | 1         | 8.997E-06 | 1.228E-04 | PB-CAG-SD  |
| MIR151      | microRNA 151 [Source:HGNC Symbol:Acc:14044]                                                                              | 12    | 6068007   | 6068007   | 37            | 0.004    | 1        | 1         | 9.149E-06 | 1.228E-04 | PB-CAG-SD  |
| GALR2       | galanin receptor 2 [Source:HGNC Symbol:Acc:4133]                                                                         | 17    | 74076575  | 74073822  | 28            | 0.004    | 1        | 1         | 9.182E-06 | 1.228E-04 | PB-CAG-SD  |
| RNLS63P     | RNA, 7SL, cytoplasmic 63, pseudogene [Source:HGNC Symbol:Acc:46669]                                                      | 1     | 92295333  | 92300331  | 36            | 0.004    | 1        | 1         | 9.480E-06 | 1.241E-04 | PB-CAG-SD  |
| PPOX        | peroxyl oxygen oxidase [Source:HGNC Symbol:Acc:8280]                                                                     | 16    | 161131200 | 161147800 | 38            | 0.004    | 1        | 1         | 9.489E-06 | 1.241E-04 | PB-CAG-SD  |
| PLEKH6      | pleckstrin homology domain containing, family G (with RhoGef domain) member 6 [Source:HGNC Symbol:Acc:25562]             | 12    | 6144602   | 6143762   | 38            | 0.004    | 1        | 1         | 9.649E-06 | 1.249E-04 | PB-CAG-SD  |
| HIST1H2AG   | histone cluster 1, H2ag [Source:HGNC Symbol:Acc:47067]                                                                   | 6     | 27095832  | 27103070  | 45            | 0.004    | 1        | 1         | 9.959E-06 | 1.260E-04 | PB-CAG-SD  |
| TMED5       | transmembrane emp24 protein transport domain containing 5 [Source:HGNC Symbol:Acc:24251]                                 | 1     | 93512599  | 93561285  | 326           | 0.039    | 2        | 1         | 9.964E-06 | 1.260E-04 | PB-CAG-SD  |
| RPH1-2P     | RNA, U6 small nuclear 1, pseudogene [Source:HGNC Symbol:Acc:47029]                                                       | 14    | 65319808  | 65324988  | 41            | 0.004    | 1        | 1         | 9.994E-06 | 1.260E-04 | PB-CAG-SD  |
| RNAU6-137P  | RNA, U6 small nuclear 137, pseudogene [Source:HGNC Symbol:Acc:47100]                                                     | 2     | 42934880  | 42939857  | 50            | 0.005    | 1        | 1         | 1.034E-05 | 1.273E-04 | PB-CAG-SD  |
| RNU1-150P   | RNA, U1 small nuclear 150, pseudogene [Source:HGNC Symbol:Acc:48492]                                                     | 5     | 40264660  | 40269821  | 43            | 0.005    | 1        | 1         | 1.040E-05 | 1.273E-04 | PB-CAG-SD  |
| SH2D5       | SH2 domain containing 5 [Source:HGNC Symbol:Acc:2891]                                                                    | 5     | 21064225  | 21064330  | 38            | 0.005    | 1        | 1         | 1.068E-05 | 1.273E-04 | PB-CAG-SD  |
| LINC00113   | long non-coding RNA 113 [Source:HGNC Symbol:Acc:1264]                                                                    | 21    | 29089968  | 29090552  | 27            | 0.005    | 1        | 1         | 1.082E-05 | 1.273E-04 | PB-CAG-SD  |
| OR11J2P     | olfactory receptor, family 11, subfamily J, member 2 pseudogene [Source:HGNC Symbol:Acc:15370]                           | 5     | 21161004  | 21166910  | 45            | 0.005    | 1        | 1         | 1.078E-05 | 1.273E-04 | PB-CAG-SD  |
| TUBB8P      | tubulin, beta 8 class VIII pseudogene 8 [Source:HGNC Symbol:Acc:42346]                                                   | 3     | 197841592 | 197847489 | 39            | 0.005    | 1        | 1         | 1.079E-05 | 1.273E-04 | PB-CAG-SD  |
| RPL29P14    | ribosomal protein L29 pseudogene 14 [Source:HGNC Symbol:Acc:36687]                                                       | 5     | 14852496  | 148930373 | 44            | 0.005    | 1        | 1         | 1.089E-05 | 1.273E-04 | PB-CAG-SD  |
| ANKO71      | ankyrin domain containing 7 [Source:HGNC Symbol:Acc:32242]                                                               | 1     | 16542404  | 16543204  | 28            | 0.005    | 1        | 1         | 1.112E-05 | 1.273E-04 | PB-CAG-SD  |
| OTUD1       | OTU domain containing 1 [Source:HGNC Symbol:Acc:27346]                                                                   | 10    | 23723198  | 23731308  | 42            | 0.005    | 1        | 1         | 1.147E-05 | 1.315E-04 | PB-CAG-SD  |
| HIST1H2BF   | histone cluster 1, H2bf [Source:HGNC Symbol:Acc:4752]                                                                    | 6     | 26194748  | 26200942  | 49            | 0.005    | 1        | 1         | 1.181E-05 | 1.341E-04 | PB-CAG-SD  |
| RNAU6-431P  | RNA, U6 small nuclear 431, pseudogene [Source:HGNC Symbol:Acc:47394]                                                     | 4     | 10958306  | 109657412 | 56            | 0.005    | 1        | 1         | 1.216E-05 | 1.355E-04 | PB-CAG-SD  |
| ZNF227      | zinc finger protein 227 [Source:HGNC Symbol:Acc:10028]                                                                   | 17    | 44708700  | 44714121  | 104           | 0.006    | 1        | 1         | 1.218E-05 | 1.355E-04 | PB-CAG-SD  |
| VN1R5P      | vomerolysin 1 receptor 65 pseudogene [Source:HGNC Symbol:Acc:37385]                                                      | 16    | 31560426  | 31566233  | 38            | 0.005    | 1        | 1         | 1.226E-05 | 1.355E-04 | PB-CAG-SD  |
| LSM7        | LSM7 homolog, U6 small nuclear RNA associated (S. cerevisiae) [Source:HGNC Symbol:Acc:20470]                             | 19    | 2321520   | 2323615   | 23            | 0.005    | 1        | 1         | 1.251E-05 | 1.369E-04 | PB-CAG-SD  |
| POLR3K      | polymerase (RNA) III (DNA directed) polypeptide K, 12.3 kDa [Source:HGNC Symbol:Acc:14121]                               | 16    | 96407     | 108628    | 39            | 0.005    | 1        | 1         | 1.292E-05 | 1.401E-04 | PB-CAG-SD  |
| MIR35D11    | microRNA 35d11 [Source:HGNC Symbol:Acc:25458]                                                                            | 1     | 58702651  | 58703631  | 52            | 0.005    | 1        | 1         | 1.316E-05 | 1.401E-04 | PB-CAG-SD  |
| MICA        | MHC class I polypeptide-related sequence A [Source:HGNC Symbol:Acc:7090]                                                 | 6     | 3136356   | 31383092  | 52            | 0.005    | 1        | 1         | 1.329E-05 | 1.405E-04 | PB-CAG-SD  |
| MIR628      | microRNA 628 [Source:HGNC Symbol:Acc:32884]                                                                              | 15    | 55665138  | 55670232  | 50            | 0.005    | 1        | 1         | 1.338E-05 | 1.405E-04 | PB-CAG-SD  |
| SRRT        | serate RNA effector molecule homolog (Arabidopsis) [Source:HGNC Symbol:Acc:24101]                                        | 7     | 10046733  | 10048285  | 44            | 0.005    | 1        | 1         | 1.389E-05 | 1.454E-04 | PB-CAG-SD  |
| PRMT5-AS1   | PRMT5 antisense RNA 1 [Source:HGNC Symbol:Acc:10028]                                                                     | 14    | 23396150  | 23396150  | 49            | 0.005    | 1        | 1         | 1.434E-05 | 1.473E-04 | PB-CAG-SD  |
| ATP6VE2-AS1 | ATP6VE2 antisense RNA 1 [Source:HGNC Symbol:Acc:44180]                                                                   | 7     | 149564786 | 149582699 | 45            | 0.005    | 1        | 1         | 1.452E-05 | 1.473E-04 | PB-CAG-SD  |
| LTBR        |                                                                                                                          |       |           |           |               |          |          |           |           |           |            |



**table S2. Genes with significant transposon integrations in RKO BRAF<sup>wt/c</sup> cells after selection in low glucose medium**

| Gene ID       | Description                                                                                                     | Chrom | Start     | End       | # TTAAs sites | Expected | Observed | Libraries | P         | FDR       | Transposon |
|---------------|-----------------------------------------------------------------------------------------------------------------|-------|-----------|-----------|---------------|----------|----------|-----------|-----------|-----------|------------|
| SMAP2         | small ArfGAP2 [Source:HGNC Symbol;Acc:25082]                                                                    | 1     | 40805522  | 40888998  | 509           | 0.062    | 2        | 2         | 3.730E-05 | 2.495E-04 | PB-CAG-SD  |
| KANSL1-AS1    | KANSL1 antisense RNA 1 [Source:HGNC Symbol;Acc:43740]                                                           | 17    | 44255942  | 44274089  | 97            | 0.029    | 1        | 2         | 1.524E-05 | 2.524E-04 | PB-CAG-SD  |
| CBL           | Cbl proto-oncogene, E3 ubiquitin protein ligase [Source:HGNC Symbol;Acc:1541]                                   | 11    | 119071752 | 119178859 | 723           | 0.063    | 2        | 2         | 3.945E-05 | 2.622E-04 | PB-CAG-SD  |
| CYP4F10P      | cytochrome P450, family 4, subfamily F, polypeptide 10, pseudogene [Source:HGNC Symbol;Acc:39943]               | 19    | 15769931  | 15780365  | 42            | 0.009    | 1        | 1         | 4.160E-05 | 2.737E-04 | PB-CAG-SD  |
| SRSF7         | serine/arginine-rich splicing factor 7 [Source:HGNC Symbol;Acc:10789]                                           | 2     | 38970411  | 38983636  | 101           | 0.009    | 1        | 1         | 4.207E-05 | 2.739E-04 | PB-CAG-SD  |
| FEZ2          | fasciolarin and elongation protein zeta 2 (zeta II) [Source:HGNC Symbol;Acc:3660]                               | 2     | 36778501  | 36878230  | 705           | 0.064    | 2        | 1         | 4.208E-05 | 2.739E-04 | PB-CAG-SD  |
| CALCOCO1      | calcium binding and coiled-coil domain 1 [Source:HGNC Symbol;Acc:29306]                                         | 12    | 54104903  | 54128529  | 80            | 0.009    | 1        | 1         | 4.23E-05  | 2.765E-04 | PB-CAG-SD  |
| TKTL1         | transketolase-like 1 [Source:HGNC Symbol;Acc:11835]                                                             | X     | 15319024  | 153558700 | 140           | 0.010    | 1        | 1         | 4.583E-05 | 2.951E-04 | PB-CAG-SD  |
| C11orf71      | chromosome 11 open reading frame 71 [Source:HGNC Symbol;Acc:25937]                                              | 11    | 114262165 | 114278139 | 112           | 0.010    | 1        | 1         | 4.722E-05 | 3.024E-04 | PB-CAG-SD  |
| PHYKPL        | 5-phosphotyloxy-L-lysine phosphatase [Source:HGNC Symbol;Acc:28249]                                             | 1     | 177635498 | 177664792 | 93            | 0.010    | 2        | 2         | 4.849E-05 | 3.089E-04 | PB-CAG-SD  |
| HIST1H2BK     | histone cluster 1, H2b [Source:HGNC Symbol;Acc:13954]                                                           | 6     | 27106073  | 27119819  | 100           | 0.010    | 1        | 1         | 4.900E-05 | 3.105E-04 | PB-CAG-SD  |
| SSU72         | SSU72 RNA polymerase II CTD phosphatase homolog (S. cerevisiae) [Source:HGNC Symbol;Acc:25016]                  | 1     | 1477053   | 1515249   | 84            | 0.010    | 1        | 1         | 5.142E-05 | 3.241E-04 | PB-CAG-SD  |
| ZNF888        | zinc finger protein 888 [Source:HGNC Symbol;Acc:36695]                                                          | 19    | 63418449  | 63431723  | 47            | 0.010    | 1        | 1         | 5.208E-05 | 3.265E-04 | PB-CAG-SD  |
| SAP30         | Sin3A-associated protein, 30kDa [Source:HGNC Symbol;Acc:10532]                                                  | 1     | 17426120  | 174298683 | 118           | 0.010    | 1        | 1         | 5.381E-05 | 3.357E-04 | PB-CAG-SD  |
| NOA1          | nitric oxide associated 1 [Source:HGNC Symbol;Acc:28473]                                                        | 4     | 57825536  | 57849989  | 121           | 0.011    | 1        | 1         | 5.657E-05 | 3.511E-04 | PB-CAG-SD  |
| MYL12A        | myosin, light chain 12A, regulatory, non-sarcomeric [Source:HGNC Symbol;Acc:16701]                              | 18    | 3242479   | 3252634   | 110           | 0.011    | 1        | 1         | 5.907E-05 | 3.647E-04 | PB-CAG-SD  |
| ZNFH16        | zinc finger, H1F-type containing 6 [Source:HGNC Symbol;Acc:26089]                                               | 1     | 86115106  | 86119176  | 596           | 0.072    | 2        | 2         | 5.941E-05 | 3.650E-04 | PB-CAG-SD  |
| PHLD1         | phlebotomus homology-like domain, family A, member 1 [Source:HGNC Symbol;Acc:8933]                              | 1     | 76419227  | 76420212  | 95            | 0.011    | 1        | 1         | 6.004E-05 | 3.670E-04 | PB-CAG-SD  |
| GTPBP2        | GTP binding protein 2 [Source:HGNC Symbol;Acc:4670]                                                             | 6     | 43573053  | 43601899  | 113           | 0.011    | 1        | 1         | 6.252E-05 | 3.802E-04 | PB-CAG-SD  |
| M6PR          | mannose-6-phosphate receptor (cation dependent) [Source:HGNC Symbol;Acc:6752]                                   | 1     | 9092959   | 9107551   | 98            | 0.011    | 1        | 1         | 6.388E-05 | 3.825E-04 | PB-CAG-SD  |
| ZKSCAN3       | zinc finger with KRAB and SCAN domain 3 [Source:HGNC Symbol;Acc:13853]                                          | 6     | 28312691  | 28336947  | 120           | 0.012    | 1        | 1         | 7.047E-05 | 4.225E-04 | PB-CAG-SD  |
| SCNN1A        | non-voltage-gated 1 alpha subunit [Source:HGNC Symbol;Acc:10599]                                                | 1     | 6455009   | 6491899   | 103           | 0.012    | 1        | 1         | 7.054E-05 | 4.225E-04 | PB-CAG-SD  |
| SATB2-AS1     | SATB2 antisense RNA 1 [Source:HGNC Symbol;Acc:26490]                                                            | 2     | 200317423 | 200341658 | 134           | 0.012    | 1        | 1         | 7.391E-05 | 4.371E-04 | PB-CAG-SD  |
| BRD9          | bromodomain containing 9 [Source:HGNC Symbol;Acc:25818]                                                         | 5     | 850406    | 897939    | 115           | 0.012    | 1        | 1         | 7.402E-05 | 4.371E-04 | PB-CAG-SD  |
| LINC00702     | long intergenic non-protein coding RNA 702 [Source:HGNC Symbol;Acc:44676]                                       | 10    | 4277752   | 4290981   | 107           | 0.012    | 1        | 1         | 7.406E-05 | 4.371E-04 | PB-CAG-SD  |
| MTDH          | metadherin [Source:HGNC Symbol;Acc:28601]                                                                       | 8     | 98651497  | 98740969  | 643           | 0.012    | 1        | 1         | 7.598E-05 | 4.536E-04 | PB-CAG-SD  |
| ATB2          | ankyrin repeat and BTB (POZ) domain containing 2 [Source:HGNC Symbol;Acc:23842]                                 | 11    | 34172535  | 34384555  | 917           | 0.080    | 2        | 1         | 7.986E-05 | 4.663E-04 | PB-CAG-SD  |
| C9orf64       | chromosome 9 open reading frame 64 [Source:HGNC Symbol;Acc:28144]                                               | 9     | 86553226  | 86578901  | 129           | 0.013    | 1        | 1         | 8.017E-05 | 4.663E-04 | PB-CAG-SD  |
| ZNF282        | zinc finger protein 282 [Source:HGNC Symbol;Acc:13076]                                                          | 7     | 148887577 | 148923339 | 107           | 0.013    | 1        | 1         | 8.169E-05 | 4.708E-04 | PB-CAG-SD  |
| TAF13         | TAF13 RNA polymerase II, TATA box binding protein (TBP)-associated factor, 18kDa [Source:HGNC Symbol;Acc:11546] | X     | 109605108 | 109623624 | 106           | 0.013    | 1        | 1         | 8.173E-05 | 4.708E-04 | PB-CAG-SD  |
| GEMIN8        | gen (nucleosome organizer) associated protein 8 [Source:HGNC Symbol;Acc:26044]                                  | 2     | 140263398 | 14030312  | 188           | 0.013    | 1        | 1         | 8.278E-05 | 4.784E-04 | PB-CAG-SD  |
| IAH1          | isomyl acetate-hydrolyzing esterase 1 homolog (S. cerevisiae) [Source:HGNC Symbol;Acc:27696]                    | X     | 96087827  | 9636672   | 143           | 0.013    | 1        | 1         | 8.412E-05 | 4.800E-04 | PB-CAG-SD  |
| CCTP1         | chaperonin containing TCP1, subunit 6 (zeta) pseudogene 1 [Source:HGNC Symbol;Acc:33094]                        | 7     | 65211129  | 65228341  | 110           | 0.013    | 1        | 1         | 8.632E-05 | 4.902E-04 | PB-CAG-SD  |
| RFS24         | ribosomal protein S24 [Source:HGNC Symbol;Acc:10411]                                                            | 10    | 79780518  | 79816570  | 116           | 0.013    | 1        | 1         | 8.689E-05 | 4.917E-04 | PB-CAG-SD  |
| NPN1          | nephrocytin [Source:HGNC Symbol;Acc:27405]                                                                      | 6     | 106818392 | 106891984 | 98            | 0.083    | 2        | 1         | 9.017E-05 | 5.073E-04 | PB-CAG-SD  |
| NUPB1         | nucleotide binding protein 1 [Source:HGNC Symbol;Acc:8041]                                                      | 16    | 10832643  | 10863208  | 104           | 0.014    | 1        | 1         | 9.134E-05 | 5.115E-04 | PB-CAG-SD  |
| RBM7          | RNA binding motif protein 7 [Source:HGNC Symbol;Acc:9904]                                                       | 11    | 114265752 | 114284925 | 158           | 0.014    | 1        | 1         | 9.373E-05 | 5.224E-04 | PB-CAG-SD  |
| ABIZ          | ab-integrator 2 [Source:HGNC Symbol;Acc:44011]                                                                  | 2     | 204187942 | 204301806 | 904           | 0.085    | 2        | 1         | 9.634E-05 | 5.345E-04 | PB-CAG-SD  |
| UCA1          | urocortin associated protein 1 (non-protein coding) [Source:HGNC Symbol;Acc:37126]                              | 19    | 15924757  | 15947130  | 126           | 0.014    | 1        | 1         | 9.881E-05 | 5.451E-04 | PB-CAG-SD  |
| CUBN2P2       | cubilin (intrinsic factor-cobalamin receptor) pseudogene 2 [Source:HGNC Symbol;Acc:44984]                       | 10    | 45727474  | 45747809  | 65            | 0.014    | 1        | 1         | 1.009E-04 | 5.549E-04 | PB-CAG-SD  |
| LINC00458     | long intergenic non-protein coding RNA 458 [Source:HGNC Symbol;Acc:42807]                                       | 13    | 54889924  | 54712001  | 166           | 0.014    | 1        | 1         | 1.017E-04 | 5.566E-04 | PB-CAG-SD  |
| PHD12         | phosphodiesterase 12 [Source:HGNC Symbol;Acc:25386]                                                             | 3     | 57537033  | 57592257  | 121           | 0.014    | 1        | 1         | 1.032E-04 | 5.597E-04 | PB-CAG-SD  |
| TRIP13        | thyrotropin receptor interactor 13 [Source:HGNC Symbol;Acc:12307]                                               | 6     | 887752    | 919472    | 96            | 0.014    | 1        | 1         | 1.034E-04 | 5.597E-04 | PB-CAG-SD  |
| OSTC          | oligosaccharyltransferase complex subunit (non-catalytic) [Source:HGNC Symbol;Acc:24448]                        | 4     | 109566740 | 109588976 | 164           | 0.014    | 1        | 1         | 1.037E-04 | 5.597E-04 | PB-CAG-SD  |
| OXR1          | oxidative stress responsive 1 (Source:HGNC Symbol;Acc:8508)                                                     | 3     | 38201580  | 38269739  | 733           | 0.087    | 2        | 2         | 1.044E-04 | 5.612E-04 | PB-CAG-SD  |
| EFCC1         | EF-hand and coiled-coil domain containing 1 [Source:HGNC Symbol;Acc:25692]                                      | 3     | 128715472 | 128759585 | 123           | 0.015    | 1        | 1         | 1.066E-04 | 5.706E-04 | PB-CAG-SD  |
| ST13A-AS1     | ST13A antisense RNA 1 [Source:HGNC Symbol;Acc:44598]                                                            | 1     | 258194408 | 258447180 | 189           | 0.015    | 1        | 1         | 1.072E-04 | 5.744E-04 | PB-CAG-SD  |
| GSG1          | germ cell associated 1 [Source:HGNC Symbol;Acc:19716]                                                           | 12    | 13236494  | 13261199  | 128           | 0.015    | 1        | 1         | 1.087E-04 | 5.767E-04 | PB-CAG-SD  |
| SNHG5         | small nucleolar RNA host gene 5 (non-protein coding) [Source:HGNC Symbol;Acc:21026]                             | 6     | 86377010  | 86393451  | 150           | 0.015    | 1        | 1         | 1.099E-04 | 5.803E-04 | PB-CAG-SD  |
| CCDC117       | coiled-coil domain containing 117 [Source:HGNC Symbol;Acc:26599]                                                | 22    | 29163602  | 29183265  | 125           | 0.015    | 1        | 1         | 1.107E-04 | 5.820E-04 | PB-CAG-SD  |
| KPNA7         | karyopherin alpha 7 (importin alpha) [Source:HGNC Symbol;Acc:21839]                                             | 17    | 98071197  | 98201129  | 125           | 0.015    | 1        | 1         | 1.113E-04 | 5.835E-04 | PB-CAG-SD  |
| HMG81         | high mobility group box 1 [Source:HGNC Symbol;Acc:4963]                                                         | 13    | 31032884  | 31196734  | 1046          | 0.090    | 2        | 1         | 1.147E-04 | 5.977E-04 | PB-CAG-SD  |
| LINC00443     | long intergenic non-protein coding RNA 443 [Source:HGNC Symbol;Acc:42780]                                       | 13    | 107301264 | 107324511 | 177           | 0.015    | 1        | 1         | 1.155E-04 | 5.978E-04 | PB-CAG-SD  |
| LTN1          | listerin E3 ubiquitin protein ligase 1 [Source:HGNC Symbol;Acc:13082]                                           | 21    | 30330466  | 30370277  | 624           | 0.091    | 2        | 1         | 1.157E-04 | 5.978E-04 | PB-CAG-SD  |
| OXSM          | oxo-CMP synthase, mitochondrial [Source:HGNC Symbol;Acc:26663]                                                  | 1     | 258194408 | 25831908  | 129           | 0.016    | 1        | 1         | 1.175E-04 | 6.032E-04 | PB-CAG-SD  |
| AKR1N1        | akrin 1 [Source:HGNC Symbol;Acc:25744]                                                                          | 1     | 39451895  | 39471731  | 128           | 0.016    | 1        | 1         | 1.190E-04 | 6.095E-04 | PB-CAG-SD  |
| SULT1C2P1     | sulfotransferase family, cytosolic, 1C, member 2 pseudogene 1 [Source:HGNC Symbol;Acc:33545]                    | 2     | 108933694 | 108970255 | 171           | 0.016    | 1        | 1         | 1.201E-04 | 6.126E-04 | PB-CAG-SD  |
| DDX47         | DEAD (Asp-Glu-Ala-Asp) box polypeptide 47 [Source:HGNC Symbol;Acc:18682]                                        | 12    | 12821250  | 12829125  | 135           | 0.016    | 1        | 1         | 1.209E-04 | 6.132E-04 | PB-CAG-SD  |
| MOCE2         | moroccan coiled-coil protein 2 [Source:HGNC Symbol;Acc:16732]                                                   | 17    | 71336814  | 71337369  | 172           | 0.016    | 1        | 1         | 1.232E-04 | 6.234E-04 | PB-CAG-SD  |
| ZNF181        | zinc finger protein 181 [Source:HGNC Symbol;Acc:12971]                                                          | 19    | 35220060  | 35233777  | 72            | 0.016    | 1        | 1         | 1.217E-04 | 6.132E-04 | PB-CAG-SD  |
| STOML3        | stromatin (EPB2)-like 3 [Source:HGNC Symbol;Acc:19420]                                                          | 13    | 39540062  | 39570203  | 184           | 0.016    | 1        | 1         | 1.248E-04 | 6.282E-04 | PB-CAG-SD  |
| COX20         | COX20 cytochrome C oxidase assembly factor [Source:HGNC Symbol;Acc:26970]                                       | 1     | 24490324  | 24500359  | 132           | 0.016    | 1        | 1         | 1.265E-04 | 6.283E-04 | PB-CAG-SD  |
| M-Phase-SPH10 | M-phase promoting factor 10 (M-phase nuclear ribonucleoprotein) [Source:HGNC Symbol;Acc:7213]                   | 17    | 71352444  | 71352444  | 1             | 0.016    | 1        | 1         | 1.283E-04 | 6.381E-04 | PB-CAG-SD  |
| EXOC3         | exocyst complex component 3 [Source:HGNC Symbol;Acc:30378]                                                      | 5     | 438273    | 472052    | 151           | 0.016    | 1        | 1         | 1.273E-04 | 6.283E-04 | PB-CAG-SD  |
| KLF           | chemokine-like factor [Source:HGNC Symbol;Acc:13253]                                                            | 16    | 66581466  | 66600331  | 123           | 0.016    | 1        | 1         | 1.275E-04 | 6.283E-04 | PB-CAG-SD  |
| SRPF2         | signal-regulatory protein beta 2 [Source:HGNC Symbol;Acc:16247]                                                 | 20    | 1451386   | 1477233   | 112           | 0.016    | 1        | 1         | 1.281E-04 | 6.283E-04 | PB-CAG-SD  |
| ZBED3         | ZBED3, BED-type containing 3 [Source:HGNC Symbol;Acc:20711]                                                     | 2     | 78368997  | 78389148  | 162           | 0.017    | 1        | 1         | 1.283E-04 | 6.283E-04 | PB-CAG-SD  |
| PHKA1-AS1     | PHKA1 antisense RNA 1 [Source:HGNC Symbol;Acc:40446]                                                            | X     | 71903800  | 71932190  | 236           | 0.016    | 1        | 1         | 1.297E-04 | 6.283E-04 | PB-CAG-SD  |
| NAA38         | N(alpha)-acetyltransferase 38, N-acetyl auxiliary subunit [Source:HGNC Symbol;Acc:20471]                        | 7     | 117819086 | 117832878 | 135           | 0.016    | 1        | 1         | 1.297E-04 | 6.283E-04 | PB-CAG-SD  |
| DYLL1         | dymin, light chain, LC8-type 1 [Source:HGNC Symbol;Acc:15476]                                                   | 12    | 120602653 | 120936296 | 140           | 0.016    | 1        | 1         | 1.299E-04 | 6.283E-04 | PB-CAG-SD  |
| NWB12B        | nucleolar body subunit 12B [Source:HGNC Symbol;Acc:23368]                                                       | 1     | 129084128 | 129084128 | 1             | 0.016    | 1        | 1         | 1.308E-04 | 6.344E-04 | PB-CAG-SD  |
| SHRPH         | SNF2 histone linker PHD RING helicase, E3 ubiquitin protein ligase [Source:HGNC Symbol;Acc:19336]               | 12    | 146185381 | 146290559 | 959           | 0.095    | 2        | 1         | 1.341E-04 | 6.434E-04 | PB-CAG-SD  |
| THAP8         | THAP domain containing 8 [Source:HGNC Symbol;Acc:23191]                                                         | 19    | 36525887  | 36550694  | 76            | 0.017    | 1        | 1         | 1.356E-04 | 6.476E-04 | PB-CAG-SD  |
| ZRSR2         | zinc finger (CCCH) type, RNA-binding motif and serine/arginine rich 2 [Source:HGNC Symbol;Acc:23019]            | X     | 15803595  | 15841383  | 243           | 0.017    | 1        | 1         | 1.374E-04 | 6.516E-04 | PB-CAG-SD  |
| HNRNPF        | heterogeneous nuclear ribonucleoprotein F [Source:HGNC Symbol;Acc:6539]                                         | 6     | 43891865  | 43908158  | 146           | 0.017    | 1        | 1         | 1.376E-04 | 6.516E-04 | PB-CAG-SD  |
| ARGHEF28      | Rho guanine nucleotide exchange factor (GEF) 28 [Source:HGNC Symbol;Acc:30322]                                  | 5     | 72916983  | 73237818  | 2380          | 0.253    | 3        | 2         | 1.392E-04 | 6.574E-04 | PB-CAG-SD  |
| CPN2E         | copine II [Source:HGNC Symbol;Acc:2315]                                                                         | 16    | 67121449  | 67181788  | 129           | 0.017    | 1        | 1         | 1.402E-04 | 6.595E-04 | PB-CAG-SD  |
| ERIC2H        |                                                                                                                 |       |           |           |               |          |          |           |           |           |            |

table S2. Genes with significant transposon integrations in RKO BRAF<sup>WT</sup> cells after selection in low glucose medium

| Gene ID    | Description                                                                                                               | Chrom | Start     | End       | # TTAAs sites | Expected | Observed | Libraries | P         | FDR       | Transposon |
|------------|---------------------------------------------------------------------------------------------------------------------------|-------|-----------|-----------|---------------|----------|----------|-----------|-----------|-----------|------------|
| VGLL4      | vestigial like 4 (Drosophila) [Source:HGNC Symbol;Acc:28966]                                                              | 3     | 11597944  | 11767220  | 992           | 0.118    | 2        | 1         | 2.529E-04 | 9.576E-04 | PB-CAG-SD  |
| TRIM14     | TRIM14 containing 14 [Source:HGNC Symbol;Acc:16263]                                                                       | 9     | 10063457  | 10263452  | 231           | 0.023    | 1        | 1         | 2.535E-04 | 1.037E-04 | PB-CAG-SD  |
| LSM12      | LSM12 homolog (S. cerevisiae) [Source:HGNC Symbol;Acc:26407]                                                              | 17    | 42112003  | 42149987  | 150           | 0.023    | 1        | 1         | 2.602E-04 | 9.792E-04 | PB-CAG-SD  |
| PLEKH3A3   | pleckstrin homology domain containing, family A (phosphoinositide binding specific) member 3 [Source:HGNC Symbol;Acc:143] | 2     | 179340195 | 179370093 | 257           | 0.023    | 1        | 1         | 2.698E-04 | 1.012E-03 | PB-CAG-SD  |
| PITPNPA    | phosphatidylinositol transfer protein, alpha [Source:HGNC Symbol;Acc:9001]                                                | 17    | 1421012   | 1471110   | 163           | 0.023    | 1        | 1         | 2.707E-04 | 1.012E-03 | PB-CAG-SD  |
| STMN1D1    | stathmin domain containing 1 [Source:HGNC Symbol;Acc:44668]                                                               | 6     | 17079489  | 17113603  | 237           | 0.024    | 1        | 1         | 2.728E-04 | 1.017E-03 | PB-CAG-SD  |
| BMP3       | bone morphogenetic protein 3 [Source:HGNC Symbol;Acc:1070]                                                                | 4     | 81947119  | 81978885  | 270           | 0.024    | 1        | 1         | 2.762E-04 | 1.037E-03 | PB-CAG-SD  |
| MTRF1      | mitochondrial fission regulator 1 [Source:HGNC Symbol;Acc:29510]                                                          | 8     | 66551969  | 66683496  | 994           | 0.123    | 2        | 1         | 2.799E-04 | 1.037E-03 | PB-CAG-SD  |
| BCIP1      | BRCAC and CDKN1A interacting protein [Source:HGNC Symbol;Acc:978]                                                         | 10    | 127507115 | 127542264 | 210           | 0.024    | 1        | 1         | 2.830E-04 | 1.043E-03 | PB-CAG-SD  |
| NSFLC1     | NSFL1 (p77) cofactor (p47) [Source:HGNC Symbol;Acc:15912]                                                                 | 22    | 1422807   | 1453417   | 167           | 0.024    | 1        | 1         | 2.835E-04 | 1.043E-03 | PB-CAG-SD  |
| MIER2      | mesoderm induction response 1, family member 2 [Source:HGNC Symbol;Acc:29210]                                             | 19    | 305575    | 349798    | 111           | 0.024    | 1        | 1         | 2.877E-04 | 1.056E-03 | PB-CAG-SD  |
| SUPT5H     | suppressor of Ty 5 homolog (S. cerevisiae) [Source:HGNC Symbol;Acc:11469]                                                 | 19    | 39921796  | 39967310  | 112           | 0.024    | 1        | 1         | 2.929E-04 | 1.072E-03 | PB-CAG-SD  |
| ATP1A4     | ATPase, Na <sup>+</sup> /K <sup>+</sup> transporting, alpha 4 polypeptide [Source:HGNC Symbol;Acc:14073]                  | 1     | 16011630  | 16051677  | 202           | 0.024    | 1        | 1         | 2.945E-04 | 1.075E-03 | PB-CAG-SD  |
| MCM3AP-AS1 | MCM3AP antisense RNA 1 [Source:HGNC Symbol;Acc:16417]                                                                     | 21    | 47694131  | 4770304   | 169           | 0.025    | 1        | 1         | 2.959E-04 | 1.075E-03 | PB-CAG-SD  |
| ADCY7      | adenylyl cyclase 7 [Source:HGNC Symbol;Acc:238]                                                                           | 16    | 50275048  | 50352046  | 188           | 0.025    | 1        | 1         | 2.983E-04 | 1.075E-03 | PB-CAG-SD  |
| AASDHPPT   | aminoadipate-semialdehyde dehydrogenase-phosphotransferase [Source:HGNC Symbol;Acc:14235]                                 | 11    | 105941228 | 105996437 | 285           | 0.025    | 1        | 1         | 3.027E-04 | 1.089E-03 | PB-CAG-SD  |
| AP2        | AP2 associated kinase 1 [Source:HGNC Symbol;Acc:19679]                                                                    | 2     | 6988532   | 69906481  | 1382          | 0.126    | 2        | 1         | 3.027E-04 | 1.089E-03 | PB-CAG-SD  |
| LRRC48     | eukotic translation initiation factor 5A2 [Source:HGNC Symbol;Acc:25384]                                                  | 2     | 14266207  | 14268424  | 212           | 0.022    | 1        | 1         | 3.032E-04 | 1.093E-03 | PB-CAG-SD  |
| ACIN1      | apoptotic chromatin condensation inducer 1 [Source:HGNC Symbol;Acc:17068]                                                 | 14    | 23527773  | 23569823  | 227           | 0.025    | 1        | 1         | 3.038E-04 | 1.089E-03 | PB-CAG-SD  |
| URO5       | uroporphyrinogen III synthase [Source:HGNC Symbol;Acc:12592]                                                              | 10    | 12747146  | 12751617  | 218           | 0.025    | 1        | 1         | 3.048E-04 | 1.089E-03 | PB-CAG-SD  |
| TYW5       | RNA-VW synthesizing protein 5 [Source:HGNC Symbol;Acc:26754]                                                              | 2     | 200794988 | 200825829 | 275           | 0.025    | 1        | 1         | 3.088E-04 | 1.099E-03 | PB-CAG-SD  |
| ZNF595     | zinc finger protein 595 [Source:HGNC Symbol;Acc:27178]                                                                    | 4     | 48319     | 48309     | 285           | 0.025    | 1        | 1         | 3.108E-04 | 1.101E-03 | PB-CAG-SD  |
| AAR2       | AAR2 scaffolding factor homolog (S. cerevisiae) [Source:HGNC Symbol;Acc:15886]                                            | 20    | 34819381  | 34858040  | 175           | 0.025    | 1        | 1         | 3.109E-04 | 1.101E-03 | PB-CAG-SD  |
| SLC35B4    | solute carrier family 35 (UDP-xylose/UDP-N-acetylglucosamine transporter), member B4 [Source:HGNC Symbol;Acc:20584]       | 7     | 133974084 | 134006803 | 210           | 0.025    | 1        | 1         | 3.121E-04 | 1.102E-03 | PB-CAG-SD  |
| MD21       | Mab-21 domain containing 1 [Source:HGNC Symbol;Acc:21367]                                                                 | 6     | 74123238  | 74166999  | 254           | 0.025    | 1        | 1         | 3.129E-04 | 1.102E-03 | PB-CAG-SD  |
| EIF5A2     | eukotic translation initiation factor 5A2 [Source:HGNC Symbol;Acc:3301]                                                   | 2     | 170654204 | 170654204 | 212           | 0.022    | 1        | 1         | 3.146E-04 | 1.104E-03 | PB-CAG-SD  |
| TK2        | thymidine kinase 2, mitochondrial [Source:HGNC Symbol;Acc:11831]                                                          | 16    | 66541906  | 66591447  | 195           | 0.025    | 1        | 1         | 3.188E-04 | 1.115E-03 | PB-CAG-SD  |
| KBTBD3     | kelch repeat and BTB (POZ) domain containing 3 [Source:HGNC Symbol;Acc:22934]                                             | 11    | 105921825 | 105953492 | 294           | 0.026    | 1        | 1         | 3.220E-04 | 1.124E-03 | PB-CAG-SD  |
| NT5M       | 5',3'-nucleotidase, mitochondrial [Source:HGNC Symbol;Acc:15769]                                                          | 17    | 17201649  | 17250977  | 168           | 0.026    | 1        | 1         | 3.258E-04 | 1.132E-03 | PB-CAG-SD  |
| AFP        | alpha-fetoprotein [Source:HGNC Symbol;Acc:317]                                                                            | 4     | 74291855  | 74321891  | 292           | 0.026    | 1        | 1         | 3.326E-04 | 1.132E-03 | PB-CAG-SD  |
| CACNA11    | calcium channel, voltage-dependent, L type, alpha 1I subunit [Source:HGNC Symbol;Acc:1396]                                | 22    | 39981758  | 40059742  | 218           | 0.026    | 1        | 1         | 3.356E-04 | 1.156E-03 | PB-CAG-SD  |
| SYN11      | synaptotagmin 11 [Source:HGNC Symbol;Acc:11503]                                                                           | 21    | 34010169  | 34105359  | 202           | 0.131    | 2        | 3         | 3.391E-04 | 1.170E-03 | PB-CAG-SD  |
| LRP5       | low density lipoprotein receptor-related protein 5 [Source:HGNC Symbol;Acc:6697]                                          | 11    | 68705777  | 68216473  | 303           | 0.026    | 1        | 1         | 3.418E-04 | 1.176E-03 | PB-CAG-SD  |
| KLF1-CMTM1 | KLF1-CMTM1 readthrough [Source:HGNC Symbol;Acc:39977]                                                                     | 16    | 60581490  | 60613038  | 303           | 0.027    | 1        | 1         | 3.450E-04 | 1.185E-03 | PB-CAG-SD  |
| POCD2L     | programmed cell death 2 like [Source:HGNC Symbol;Acc:29194]                                                               | 13    | 34892899  | 34917073  | 122           | 0.027    | 1        | 1         | 3.470E-04 | 1.187E-03 | PB-CAG-SD  |
| ANP3A2     | acidic (leucine-rich) nuclear phosphoprotein 32 family, member B [Source:HGNC Symbol;Acc:16677]                           | 9     | 100740643 | 100778225 | 271           | 0.027    | 1        | 1         | 3.505E-04 | 1.192E-03 | PB-CAG-SD  |
| PSMA3      | prosome (prosome, macropain) subunit, alpha type, 3 [Source:HGNC Symbol;Acc:9532]                                         | 14    | 58706549  | 58738730  | 244           | 0.027    | 1        | 1         | 3.506E-04 | 1.192E-03 | PB-CAG-SD  |
| NBPFF15    | neuroblastoma breakpoint family, member 15 [Source:HGNC Symbol;Acc:26791]                                                 | 1     | 145500979 | 145892607 | 221           | 0.027    | 1        | 1         | 3.520E-04 | 1.194E-03 | PB-CAG-SD  |
| RP2        | retinoblastoma 2 (X-linked recessive) [Source:HGNC Symbol;Acc:10274]                                                      | 1     | 46691793  | 46741793  | 219           | 0.027    | 1        | 1         | 3.606E-04 | 1.220E-03 | PB-CAG-SD  |
| CHURC1     | churchill domain containing 1 [Source:HGNC Symbol;Acc:20099]                                                              | 14    | 66517079  | 66541309  | 348           | 0.027    | 1        | 1         | 3.621E-04 | 1.221E-03 | PB-CAG-SD  |
| ARHGAP11A  | Rho GTPase activating protein 11A [Source:HGNC Symbol;Acc:15783]                                                          | 15    | 32902345  | 32932150  | 264           | 0.027    | 1        | 1         | 3.654E-04 | 1.229E-03 | PB-CAG-SD  |
| SRP68      | signal recognition particle 68kDa [Source:HGNC Symbol;Acc:11302]                                                          | 17    | 74305184  | 74073734  | 210           | 0.028    | 1        | 1         | 3.736E-04 | 1.253E-03 | PB-CAG-SD  |
| B-CLL      | B-cell CLL lymphoma 70 [Source:HGNC Symbol;Acc:1006]                                                                      | 17    | 39849497  | 39911291  | 215           | 0.028    | 1        | 1         | 3.795E-04 | 1.269E-03 | PB-CAG-SD  |
| CANX       | calnexin [Source:HGNC Symbol;Acc:1473]                                                                                    | 5     | 179106629 | 179157926 | 263           | 0.028    | 1        | 1         | 3.831E-04 | 1.277E-03 | PB-CAG-SD  |
| HPSE       | heparanase [Source:HGNC Symbol;Acc:5164]                                                                                  | 4     | 84213614  | 84261306  | 317           | 0.028    | 1        | 1         | 3.838E-04 | 1.277E-03 | PB-CAG-SD  |
| ZNF141     | zinc finger protein 141 [Source:HGNC Symbol;Acc:12926]                                                                    | 4     | 326603    | 3278653   | 321           | 0.028    | 1        | 1         | 3.935E-04 | 1.305E-03 | PB-CAG-SD  |
| MCO1N3     | mucin 13 [Source:HGNC Symbol;Acc:13388]                                                                                   | 3     | 85491372  | 85519182  | 253           | 0.028    | 1        | 1         | 3.975E-04 | 1.317E-03 | PB-CAG-SD  |
| TXNDC12    | thioesteron domain containing 12 (endoplasmic reticulum) [Source:HGNC Symbol;Acc:24626]                                   | 1     | 52485803  | 52528843  | 235           | 0.028    | 1        | 1         | 3.975E-04 | 1.317E-03 | PB-CAG-SD  |
| CEP55      | centrosomal protein 55kDa [Source:HGNC Symbol;Acc:1161]                                                                   | 10    | 95251389  | 95288489  | 250           | 0.029    | 1        | 1         | 3.999E-04 | 1.316E-03 | PB-CAG-SD  |
| SLC35G2    | solute carrier family 35, member G2 [Source:HGNC Symbol;Acc:26480]                                                        | 3     | 136532489 | 136574734 | 240           | 0.029    | 1        | 1         | 4.022E-04 | 1.320E-03 | PB-CAG-SD  |
| TFB2M      | transcription factor B2, mitochondrial [Source:HGNC Symbol;Acc:18559]                                                     | 2     | 244973982 | 244973982 | 239           | 0.029    | 1        | 1         | 4.111E-04 | 1.336E-03 | PB-CAG-SD  |
| PLEKH1P    | pleckstrin homology domain containing, family M (with RUN domain) member 1 pseudogene [Source:HGNC Symbol;Acc:35411]      | 17    | 62775377  | 62838272  | 189           | 0.029    | 1        | 1         | 4.115E-04 | 1.336E-03 | PB-CAG-SD  |
| PLEKH1M1   | pleckstrin homology domain containing, family M (with RUN domain) member 1 [Source:HGNC Symbol;Acc:29017]                 | 17    | 43513266  | 43573115  | 189           | 0.029    | 1        | 1         | 4.115E-04 | 1.336E-03 | PB-CAG-SD  |
| MTERFD1    | MTERF domain containing 1 [Source:HGNC Symbol;Acc:24298]                                                                  | 8     | 97251626  | 97279838  | 235           | 0.029    | 1        | 1         | 4.117E-04 | 1.336E-03 | PB-CAG-SD  |
| ZNF879F    | zinc finger protein 879, pseudogene [Source:HGNC Symbol;Acc:32472]                                                        | 1     | 201138    | 201138    | 333           | 0.029    | 1        | 1         | 4.170E-04 | 1.370E-03 | PB-CAG-SD  |
| TMEM206    | transmembrane protein 206 [Source:HGNC Symbol;Acc:25593]                                                                  | 1     | 212537273 | 212593243 | 244           | 0.030    | 1        | 1         | 4.283E-04 | 1.382E-03 | PB-CAG-SD  |
| PTGR2      | prostaglandin reductase 2 [Source:HGNC Symbol;Acc:20149]                                                                  | 14    | 74313547  | 74353020  | 271           | 0.030    | 1        | 1         | 4.316E-04 | 1.390E-03 | PB-CAG-SD  |
| PPL        | periplakin [Source:HGNC Symbol;Acc:9273]                                                                                  | 16    | 4932508   | 49351542  | 229           | 0.030    | 1        | 1         | 4.381E-04 | 1.406E-03 | PB-CAG-SD  |
| GSR        | glutathione S-transferase [Source:HGNC Symbol;Acc:4623]                                                                   | 15    | 60535583  | 60599483  | 243           | 0.030    | 1        | 1         | 4.400E-04 | 1.409E-03 | PB-CAG-SD  |
| DHRS4-AS1  | DHRS4 antisense RNA 1 [Source:HGNC Symbol;Acc:23175]                                                                      | 14    | 24407940  | 24463048  | 274           | 0.030    | 1        | 1         | 4.411E-04 | 1.409E-03 | PB-CAG-SD  |
| CARS2      | cysteinylyl-tRNA synthetase 2, mitochondrial (putative) [Source:HGNC Symbol;Acc:25695]                                    | 13    | 111293759 | 111370950 | 348           | 0.030    | 1        | 1         | 4.423E-04 | 1.409E-03 | PB-CAG-SD  |
| FKBP9      | FKBP56 binding protein 9, 63 kDa [Source:HGNC Symbol;Acc:3725]                                                            | 7     | 32929201  | 33048543  | 251           | 0.030    | 1        | 1         | 4.444E-04 | 1.412E-03 | PB-CAG-SD  |
| TNFRSF19   | TNFRSF19 interacting protein 3 [Source:HGNC Symbol;Acc:20575]                                                             | 15    | 66628544  | 6663984   | 294           | 0.030    | 1        | 1         | 4.532E-04 | 1.433E-03 | PB-CAG-SD  |
| MYO16-AS1  | MYO16 antisense RNA 1 [Source:HGNC Symbol;Acc:39913]                                                                      | 13    | 109816250 | 109858831 | 353           | 0.030    | 1        | 1         | 4.550E-04 | 1.436E-03 | PB-CAG-SD  |
| UBLCP1     | ubiquitin-like domain containing CTD phosphatase 1 [Source:HGNC Symbol;Acc:28110]                                         | 5     | 158685089 | 158713044 | 287           | 0.030    | 1        | 1         | 4.555E-04 | 1.436E-03 | PB-CAG-SD  |
| C11orf107  | cystathionine lyase (cystathionine gamma-lyase) [Source:HGNC Symbol;Acc:25011]                                            | 1     | 70871901  | 70955354  | 253           | 0.031    | 1        | 1         | 4.601E-04 | 1.443E-03 | PB-CAG-SD  |
| NMT1       | N-methyltransferase 1 [Source:HGNC Symbol;Acc:7837]                                                                       | 5     | 43163384  | 43163384  | 200           | 0.031    | 1        | 1         | 4.603E-04 | 1.443E-03 | PB-CAG-SD  |
| CCDC34     | coiled-coil domain containing 34 [Source:HGNC Symbol;Acc:25078]                                                           | 11    | 27352374  | 27390415  | 356           | 0.031    | 1        | 1         | 4.704E-04 | 1.466E-03 | PB-CAG-SD  |
| LGALS8     | lectin, galactoside-binding, soluble 8 [Source:HGNC Symbol;Acc:6569]                                                      | 1     | 236676300 | 236716281 | 256           | 0.031    | 1        | 1         | 4.710E-04 | 1.466E-03 | PB-CAG-SD  |
| CCDC125    | coiled-coil domain containing 125 [Source:HGNC Symbol;Acc:28924]                                                          | 5     | 68576002  | 68633636  | 292           | 0.031    | 1        | 1         | 4.713E-04 | 1.466E-03 | PB-CAG-SD  |
| CCDC111    | coiled-coil domain containing 111 [Source:HGNC Symbol;Acc:26575]                                                          | 17    | 18569367  | 18578117  | 363           | 0.031    | 1        | 1         | 4.735E-04 | 1.469E-03 | PB-CAG-SD  |
| CLIP2      | CAP-GLY domain containing linker protein 2 [Source:HGNC Symbol;Acc:2586]                                                  | 7     | 73689805  | 73822073  | 261           | 0.031    | 1        | 1         | 4.801E-04 | 1.479E-03 | PB-CAG-SD  |
| TTI2       | TELO2 interacting protein 2 [Source:HGNC Symbol;Acc:26262]                                                                | 8     | 33339094  | 33376119  | 254           | 0.031    | 1        | 1         | 4.803E-04 | 1.479E-03 | PB-CAG-SD  |
| JAG1       | jagged 1 [Source:HGNC Symbol;Acc:9188]                                                                                    | 20    | 10018332  | 10069894  | 218           | 0.031    | 1        | 1         | 4.805E-04 | 1.479E-03 | PB-CAG-SD  |
| MAP3BP     | MAP3 binding inhibitory protein 1 [Source:HGNC Symbol;Acc:20427]                                                          | 10    | 38767770  | 38794882  | 290           | 0.031    | 1        | 1         | 4.836E-04 | 1.483E-03 | PB-CAG-SD  |
| FOXJ3      | forkhead box J3 [Source:HGNC Symbol;Acc:29178]                                                                            | 1     | 42842210  | 42860548  | 1231          | 0.149    | 2        | 1         | 4.943E-04 | 1.514E-03 | PB-CAG-SD  |
| ATPAF2     | ATP synthase mitochondrial F1 complex assembly factor 2 [Source:HGNC Symbol;Acc:18802]                                    | 17    | 17880723  | 17947523  | 209           | 0.032    | 1        | 1         | 5.022E-04 | 1.535E-03 | PB-CAG-SD  |
| TEAD1      | TEA domain family member 1 (SV40 transcriptional enhancer factor) [Source:HGNC Symbol;Acc:11714]                          |       |           |           |               |          |          |           |           |           |            |

table S2. Genes with significant transposon integrations in RKO BRAF<sup>wt/wt</sup> cells after selection in low glucose medium

| Gene ID      | Description                                                                                                            | Chrom | Start     | End       | # TTAAs sites | Expected | Observed | Libraries | P         | FDR       | Transposon |
|--------------|------------------------------------------------------------------------------------------------------------------------|-------|-----------|-----------|---------------|----------|----------|-----------|-----------|-----------|------------|
| ZNF713       | zinc finger protein 713 [Source:HGNC Symbol;Acc:22043]                                                                 | 7     | 55950169  | 56099918  | 334           | 0.040    | 1        | 1         | 7.817E-04 | 2.064E-03 | PB-CAG-SD  |
| DSG2         | desmoglein 2 [Source:HGNC Symbol;Acc:30498]                                                                            | 18    | 29073206  | 29133306  | 405           | 0.040    | 1        | 1         | 9.685E-04 | 2.466E-03 | PB-CAG-SD  |
| TMPRSS2      | transmembrane protease, serine 21 [Source:HGNC Symbol;Acc:11876]                                                       | 21    | 42383648  | 42380843  | 277           | 0.040    | 1        | 1         | 7.888E-04 | 2.064E-03 | PB-CAG-SD  |
| NUP35        | nucleoporin 35kDa [Source:HGNC Symbol;Acc:29797]                                                                       | 2     | 183977241 | 184026408 | 443           | 0.040    | 1        | 1         | 8.008E-04 | 2.080E-03 | PB-CAG-SD  |
| TRIM55       | tripartite motif containing 55 [Source:HGNC Symbol;Acc:14215]                                                          | 8     | 76034131  | 76078720  | 329           | 0.041    | 1        | 1         | 6.828E-04 | 2.096E-03 | PB-CAG-SD  |
| TMX2-CTNND1  | TMX2-CTNND1 readthrough (NMD candidate) [Source:HGNC Symbol;Acc:41992]                                                 | 11    | 57457077  | 57595058  | 467           | 0.041    | 1        | 1         | 6.043E-04 | 2.101E-03 | PB-CAG-SD  |
| TM2D1        | TM2 domain containing 1 [Source:HGNC Symbol;Acc:24142]                                                                 | 1     | 62146718  | 62196095  | 336           | 0.041    | 1        | 1         | 8.061E-04 | 2.101E-03 | PB-CAG-SD  |
| MAN2A1       | mannosidase, alpha, class 2A, member 1 [Source:HGNC Symbol;Acc:6824]                                                   | 5     | 109202067 | 109205326 | 1688          | 0.177    | 2        | 1         | 8.124E-04 | 2.113E-03 | PB-CAG-SD  |
| GARS         | glycyl-tRNA synthetase [Source:HGNC Symbol;Acc:4162]                                                                   | 7     | 30629297  | 30673649  | 342           | 0.041    | 1        | 1         | 8.191E-04 | 2.125E-03 | PB-CAG-SD  |
| H2AFY        | H2A histone family, member Y [Source:HGNC Symbol;Acc:4740]                                                             | 6     | 9629616   | 9700321   | 464           | 0.042    | 1        | 1         | 8.686E-04 | 2.227E-03 | PB-CAG-SD  |
| ALG5         | ALG5, dolichyl-phosphate beta-glucosyltransferase [Source:HGNC Symbol;Acc:20266]                                       | 13    | 37523912  | 37579398  | 480           | 0.041    | 1        | 1         | 8.435E-04 | 2.158E-03 | PB-CAG-SD  |
| ZNF695       | zinc finger protein 695 [Source:HGNC Symbol;Acc:30954]                                                                 | 1     | 247108849 | 247176395 | 346           | 0.042    | 1        | 1         | 8.541E-04 | 2.202E-03 | PB-CAG-SD  |
| RP90         | ribonuclease P/MRP 30kDa subunit [Source:HGNC Symbol;Acc:17688]                                                        | 10    | 92626473  | 92668312  | 369           | 0.042    | 1        | 1         | 8.634E-04 | 2.221E-03 | PB-CAG-SD  |
| ADAM17       | ADAM metalloproteinase domain 17 [Source:HGNC Symbol;Acc:195]                                                          | 2     | 9629616   | 9700321   | 464           | 0.042    | 1        | 1         | 8.686E-04 | 2.227E-03 | PB-CAG-SD  |
| TGFBR1       | transforming growth factor, beta receptor 1 [Source:HGNC Symbol;Acc:11772]                                             | 9     | 101861320 | 101916474 | 429           | 0.042    | 1        | 1         | 8.693E-04 | 2.227E-03 | PB-CAG-SD  |
| METAP2       | methionyl aminopeptidase 2 [Source:HGNC Symbol;Acc:16672]                                                              | 12    | 95862296  | 95909615  | 367           | 0.042    | 1        | 1         | 8.775E-04 | 2.243E-03 | PB-CAG-SD  |
| MAOA         | monoamine oxidase A [Source:HGNC Symbol;Acc:6833]                                                                      | X     | 43510467  | 43600698  | 621           | 0.043    | 1        | 1         | 8.822E-04 | 2.250E-03 | PB-CAG-SD  |
| SLC17A5      | solute carrier family 17 (anion/sugar transporter), member 5 [Source:HGNC Symbol;Acc:10933]                            | 8     | 87569205  | 87769093  | 1501          | 0.185    | 2        | 2         | 9.201E-04 | 2.322E-03 | PB-CAG-SD  |
| SYNJ2        | synaptotagmin 2 [Source:HGNC Symbol;Acc:11504]                                                                         | 6     | 158397888 | 158520208 | 433           | 0.043    | 1        | 1         | 8.888E-04 | 2.283E-03 | PB-CAG-SD  |
| CSNK2A2      | casein kinase 2, alpha prime polypeptide [Source:HGNC Symbol;Acc:2459]                                                 | 16    | 58191811  | 58236824  | 330           | 0.043    | 1        | 1         | 9.017E-04 | 2.286E-03 | PB-CAG-SD  |
| GOLPH3       | golgi phosphoprotein 3 (coat-protein) [Source:HGNC Symbol;Acc:15452]                                                   | 5     | 32124810  | 32179456  | 408           | 0.043    | 1        | 1         | 9.127E-04 | 2.308E-03 | PB-CAG-SD  |
| CNGB3        | cyclic nucleotide-gated channel beta 3 [Source:HGNC Symbol;Acc:2153]                                                   | 8     | 87569205  | 87769093  | 1501          | 0.185    | 2        | 2         | 9.201E-04 | 2.322E-03 | PB-CAG-SD  |
| ZNF677       | zinc finger protein 677 [Source:HGNC Symbol;Acc:29730]                                                                 | 19    | 57351577  | 57363151  | 200           | 0.044    | 1        | 1         | 9.220E-04 | 2.322E-03 | PB-CAG-SD  |
| MYO18A       | myosin XVIIIa [Source:HGNC Symbol;Acc:31104]                                                                           | 17    | 27400528  | 27512430  | 286           | 0.044    | 1        | 1         | 9.330E-04 | 2.341E-03 | PB-CAG-SD  |
| HDHD1        | haloacid dehalogenase-like hydrolase domain containing 1 [Source:HGNC Symbol;Acc:16818]                                | X     | 6969691   | 7071231   | 639           | 0.044    | 1        | 1         | 9.333E-04 | 2.341E-03 | PB-CAG-SD  |
| CTD6         | CTD antigen 6 (non-protein coding) [Source:HGNC Symbol;Acc:28003]                                                      | 15    | 21140787  | 21198326  | 427           | 0.044    | 1        | 1         | 9.435E-04 | 2.366E-03 | PB-CAG-SD  |
| FAM151B      | family with sequence similarity 151, member B [Source:HGNC Symbol;Acc:33716]                                           | 5     | 79778788  | 79833832  | 416           | 0.044    | 1        | 1         | 9.483E-04 | 2.361E-03 | PB-CAG-SD  |
| HS3ST3B1     | heparan sulfate (glucosamine) 3-O-sulfotransferase 3B1 [Source:HGNC Symbol;Acc:5198]                                   | 17    | 14199400  | 14252721  | 289           | 0.044    | 1        | 1         | 9.524E-04 | 2.370E-03 | PB-CAG-SD  |
| ARHGGEF37    | Rho guanine nucleotide exchange factor (GEF) 37 [Source:HGNC Symbol;Acc:34430]                                         | 5     | 148926510 | 149014531 | 417           | 0.044    | 1        | 1         | 9.528E-04 | 2.370E-03 | PB-CAG-SD  |
| EZF          | EZF transcription factor 5, p130-binding [Source:HGNC Symbol;Acc:3119]                                                 | 8     | 86084460  | 86129387  | 361           | 0.045    | 1        | 1         | 9.161E-04 | 2.387E-03 | PB-CAG-SD  |
| ZHX1-CBORF76 | ZHX1-CBORF76 readthrough [Source:HGNC Symbol;Acc:29719]                                                                | 9     | 124238431 | 12429487  | 392           | 0.045    | 1        | 1         | 9.696E-04 | 2.396E-03 | PB-CAG-SD  |
| PRPF4B       | PRPF4 pre-mRNA processing factor 4 homolog B (yeast) [Source:HGNC Symbol;Acc:17346]                                    | 6     | 40116501  | 40256217  | 500           | 0.045    | 1        | 1         | 9.696E-04 | 2.396E-03 | PB-CAG-SD  |
| EDNRA        | endothelin receptor type A [Source:HGNC Symbol;Acc:3179]                                                               | 4     | 148397069 | 148466106 | 507           | 0.045    | 1        | 1         | 9.710E-04 | 2.396E-03 | PB-CAG-SD  |
| PWWP2A       | PWWP domain containing 2A [Source:HGNC Symbol;Acc:29496]                                                               | 5     | 159488808 | 159551430 | 422           | 0.045    | 1        | 1         | 9.754E-04 | 2.402E-03 | PB-CAG-SD  |
| GNAI5        | guanine nucleotide binding protein (G protein), alpha inhibiting activity polypeptide 3 [Source:HGNC Symbol;Acc:4387]  | 10    | 110098233 | 110138975 | 379           | 0.045    | 1        | 1         | 9.805E-04 | 2.434E-03 | PB-CAG-SD  |
| AAGAB        | alpha- and gamma-adaptin binding protein [Source:HGNC Symbol;Acc:25662]                                                | 15    | 67493371  | 67552533  | 443           | 0.046    | 1        | 1         | 1.016E-03 | 2.492E-03 | PB-CAG-SD  |
| C2CD2        | C2 calcium-dependent domain containing 2 [Source:HGNC Symbol;Acc:1266]                                                 | 21    | 43305221  | 43378999  | 316           | 0.046    | 1        | 1         | 1.020E-03 | 2.495E-03 | PB-CAG-SD  |
| POLR3G       | polymrase (RNA III (DNA directed)) polypeptide G (32kD) [Source:HGNC Symbol;Acc:30075]                                 | 5     | 86762585  | 86810370  | 452           | 0.046    | 1        | 1         | 1.021E-03 | 2.495E-03 | PB-CAG-SD  |
| SLC17A8      | solute carrier family 17 (cationic amino acid transporter), member 8 [Source:HGNC Symbol;Acc:20151]                    | 12    | 100814887 | 100914887 | 389           | 0.046    | 1        | 1         | 1.037E-03 | 2.503E-03 | PB-CAG-SD  |
| TBC1D2B      | TBC1 domain family, member 2B [Source:HGNC Symbol;Acc:29183]                                                           | 15    | 78273738  | 78375686  | 448           | 0.046    | 1        | 1         | 1.039E-03 | 2.523E-03 | PB-CAG-SD  |
| CLSTN2       | calyxin 2 [Source:HGNC Symbol;Acc:17448]                                                                               | 3     | 139649027 | 140296239 | 3630          | 0.433    | 3        | 2         | 1.039E-03 | 2.523E-03 | PB-CAG-SD  |
| DPH5         | diphthamide biosynthesis 5 [Source:HGNC Symbol;Acc:24270]                                                              | 10    | 110455179 | 110496644 | 386           | 0.047    | 1        | 1         | 1.060E-03 | 2.507E-03 | PB-CAG-SD  |
| AC0A         | acyl-CoA dehydrogenase, short branched chain [Source:HGNC Symbol;Acc:91]                                               | 10    | 12476388  | 124817827 | 428           | 0.047    | 1        | 1         | 1.060E-03 | 2.507E-03 | PB-CAG-SD  |
| ZNF767       | zinc finger family member 767 [Source:HGNC Symbol;Acc:21884]                                                           | 7     | 149244245 | 149328843 | 391           | 0.047    | 1        | 1         | 1.066E-03 | 2.573E-03 | PB-CAG-SD  |
| KIAA0226     | KIAA0226 [Source:HGNC Symbol;Acc:28991]                                                                                | 3     | 197398264 | 197481598 | 394           | 0.047    | 1        | 1         | 1.071E-03 | 2.575E-03 | PB-CAG-SD  |
| CSGALNACT2   | chondroitin sulfate N-acetylgalactosaminyltransferase 2 [Source:HGNC Symbol;Acc:24292]                                 | 10    | 43828934  | 43868765  | 412           | 0.047    | 1        | 1         | 1.073E-03 | 2.575E-03 | PB-CAG-SD  |
| TERF1        | telomeric repeat binding protein (NIMA-interacting) 1 [Source:HGNC Symbol;Acc:11728]                                   | 2     | 73916099  | 73980557  | 382           | 0.047    | 1        | 1         | 1.075E-03 | 2.575E-03 | PB-CAG-SD  |
| STX6         | syntaxin 6 [Source:HGNC Symbol;Acc:11441]                                                                              | 1     | 180941861 | 180999747 | 389           | 0.047    | 1        | 1         | 1.076E-03 | 2.575E-03 | PB-CAG-SD  |
| HGSNAT       | heparan-alpha-glucosaminide N-acetyltransferase [Source:HGNC Symbol;Acc:26527]                                         | 8     | 42909556  | 43057998  | 384           | 0.047    | 1        | 1         | 1.084E-03 | 2.594E-03 | PB-CAG-SD  |
| IMPOT5       | importin 5 [Source:HGNC Symbol;Acc:6402]                                                                               | 13    | 98609122  | 98676551  | 553           | 0.048    | 1        | 1         | 1.068E-03 | 2.633E-03 | PB-CAG-SD  |
| CC2C0B       | cell division cycle 20B [Source:HGNC Symbol;Acc:24222]                                                                 | 12    | 54418789  | 54474854  | 450           | 0.048    | 1        | 1         | 1.107E-03 | 2.633E-03 | PB-CAG-SD  |
| C1orf185     | chromosome 1 open reading frame 185 [Source:HGNC Symbol;Acc:28096]                                                     | 1     | 51562906  | 51613752  | 395           | 0.048    | 1        | 1         | 1.109E-03 | 2.633E-03 | PB-CAG-SD  |
| MRPL3        | mitochondrial ribosomal protein L3 [Source:HGNC Symbol;Acc:10379]                                                      | 3     | 131181056 | 131226827 | 403           | 0.048    | 1        | 1         | 1.120E-03 | 2.653E-03 | PB-CAG-SD  |
| DDX31        | DEAD (Asp-Glu-Ala-Asp) box polypeptide family 31 [Source:HGNC Symbol;Acc:16715]                                        | 9     | 135488384 | 135550788 | 489           | 0.048    | 1        | 1         | 1.123E-03 | 2.661E-03 | PB-CAG-SD  |
| EXOC1        | exocyst complex component 1 [Source:HGNC Symbol;Acc:30390]                                                             | 5     | 66714782  | 66785154  | 547           | 0.048    | 1        | 1         | 1.126E-03 | 2.661E-03 | PB-CAG-SD  |
| MRV11        | murine retrovirus integration site 1 homolog [Source:HGNC Symbol;Acc:7237]                                             | 11    | 10594638  | 10720535  | 555           | 0.048    | 1        | 1         | 1.130E-03 | 2.663E-03 | PB-CAG-SD  |
| ITGAM        | integrin, alpha M (complement component 3 receptor 3 subunit) [Source:HGNC Symbol;Acc:6149]                            | 16    | 31266311  | 31344123  | 371           | 0.048    | 1        | 1         | 1.136E-03 | 2.671E-03 | PB-CAG-SD  |
| MAP3K9       | mitogen-activated protein kinase kinase kinase 9 [Source:HGNC Symbol;Acc:6861]                                         | 14    | 71189243  | 71281251  | 444           | 0.049    | 1        | 1         | 1.144E-03 | 2.685E-03 | PB-CAG-SD  |
| CCPS5        | acyl-CoA thioesterase 5 [Source:HGNC Symbol;Acc:24030]                                                                 | 6     | 87855314  | 87881018  | 398           | 0.049    | 1        | 1         | 1.158E-03 | 2.688E-03 | PB-CAG-SD  |
| ACOT12       | acyl-CoA thioesterase 12 [Source:HGNC Symbol;Acc:24436]                                                                | 5     | 80625824  | 80694998  | 460           | 0.049    | 1        | 1         | 1.156E-03 | 2.688E-03 | PB-CAG-SD  |
| ZNF366       | zinc finger protein 366 [Source:HGNC Symbol;Acc:18316]                                                                 | 5     | 71738479  | 71808554  | 460           | 0.049    | 1        | 1         | 1.158E-03 | 2.688E-03 | PB-CAG-SD  |
| LYPLA1       | UDP-N-acetyl-alpha-D-galactosamine polypeptide N-acetylgalactosaminyltransferase-like 5 [Source:HGNC Symbol;Acc:21725] | 7     | 151648464 | 151717019 | 408           | 0.049    | 1        | 1         | 1.160E-03 | 2.688E-03 | PB-CAG-SD  |
| SBSPON       | somatomedin B and thalassomedin, type 1 domain containing [Source:HGNC Symbol;Acc:30362]                               | 8     | 73977675  | 74041323  | 397           | 0.049    | 1        | 1         | 1.160E-03 | 2.688E-03 | PB-CAG-SD  |
| SGTB         | small glutamine-rich tetrapeptide repeat (TPR)-containing, beta [Source:HGNC Symbol;Acc:23567]                         | 5     | 64961755  | 65023862  | 461           | 0.049    | 1        | 1         | 1.161E-03 | 2.688E-03 | PB-CAG-SD  |
| SIN3A        | SIN3 transcription regulator homolog A (yeast) [Source:HGNC Symbol;Acc:19353]                                          | 15    | 71697120  | 71753183  | 475           | 0.049    | 1        | 1         | 1.169E-03 | 2.694E-03 | PB-CAG-SD  |
| HAT1         | histone H4 acetyltransferase 1 [Source:HGNC Symbol;Acc:482]                                                            | 10    | 172773958 | 17284899  | 543           | 0.049    | 1        | 1         | 1.169E-03 | 2.694E-03 | PB-CAG-SD  |
| DGKE         | diacylglycerol kinase, epsilon 64kDa [Source:HGNC Symbol;Acc:2852]                                                     | 17    | 54906460  | 54946036  | 325           | 0.050    | 1        | 1         | 1.200E-03 | 2.763E-03 | PB-CAG-SD  |
| PRR5-ARHGAP8 | PRR5-ARHGAP8 readthrough [Source:HGNC Symbol;Acc:34512]                                                                | 22    | 45093113  | 45258586  | 418           | 0.050    | 1        | 1         | 1.209E-03 | 2.773E-03 | PB-CAG-SD  |
| ARHGAP8      | Rho GTPase activating protein 8 [Source:HGNC Symbol;Acc:677]                                                           | 22    | 45093355  | 45258666  | 418           | 0.050    | 1        | 1         | 1.209E-03 | 2.773E-03 | PB-CAG-SD  |
| C17orf67     | chromosome 17 open reading frame 67 [Source:HGNC Symbol;Acc:27900]                                                     | 17    | 54892924  | 54914134  | 329           | 0.050    | 1        | 1         | 1.229E-03 | 2.823E-03 | PB-CAG-SD  |
| SHB          | Src oncology 2 domain containing adaptor protein B [Source:HGNC Symbol;Acc:10838]                                      | 9     | 37919131  | 38074210  | 514           | 0.051    | 1        | 1         | 1.241E-03 | 2.835E-03 | PB-CAG-SD  |
| ANKRD46      | ankyrin repeat domain 46 [Source:HGNC Symbol;Acc:27229]                                                                | 8     | 101521980 | 101577012 | 412           | 0.051    | 1        | 1         | 1.247E-03 | 2.844E-03 | PB-CAG-SD  |
| TTIC19       | tektin repeat domain 19 [Source:HGNC Symbol;Acc:26006]                                                                 | 17    | 15897694  | 15948329  | 332           | 0.051    | 1        | 1         | 1.251E-03 | 2.848E-03 | PB-CAG-SD  |
| GLT3LCR1L    | GLT3-like [Source:HGNC Symbol;Acc:21111]                                                                               | 5     | 42744765  | 42802628  | 519           | 0.052    | 1        | 1         | 1.129E-03 | 2.947E-03 | PB-CAG-SD  |
| NLRCS        | NLR family, CARD domain containing 5 [Source:HGNC Symbol;Acc:29933]                                                    | 16    | 57018397  | 57117443  | 395           | 0.052    | 1        | 1         | 1.285E-03 | 2.913E-03 | PB-CAG-SD  |
| MSRB3        | methionine sulfoxide reductase B3 [Source:HGNC Symbol;Acc:27375]                                                       | 12    | 65667423  | 65882204  | 1798          | 0.208    | 2        | 2         | 1.287E-03 | 2.913E-03 | PB-CAG-SD  |
| C17orf80     | chromosome 17 open reading frame 80 [Source:HGNC Symbol;Acc:26197]                                                     | 17    | 96506922  | 96610987  | 594           | 0.052    | 1        | 1         | 1.123E-03 | 2.918E-03 | PB-CAG     |

**table S2. Genes with significant transcription integrations in RKO BRAF<sup>WT</sup> cells after selection in low glucose medium**

| Gene ID   | Description                                                                                                  | Chrom | Start     | End       | # TTAAs sites | Expected | Observed | Libraries | P         | FDR       | Transposon |
|-----------|--------------------------------------------------------------------------------------------------------------|-------|-----------|-----------|---------------|----------|----------|-----------|-----------|-----------|------------|
| TMEIM200A | transmembrane protein 200A [Source:HGNC Symbol;Acc:21075]                                                    | 6     | 130681879 | 130764208 | 630           | 0.063    | 1        | 1         | 1.878E-03 | 3.807E-03 | PB-CAG-SD  |
| RPSA352   | ribosomal protein SA pseudogene 52 [Source:HGNC Symbol;Acc:35752]                                            | 6     | 64716000  | 64823754  | 543           | 0.063    | 1        | 1         | 2.221E-03 | 4.330E-03 | PB-CAG-SD  |
| GKS       | glycerol kinase 5 (putative) [Source:HGNC Symbol;Acc:28635]                                                  | 3     | 141882414 | 141949449 | 527           | 0.063    | 1        | 1         | 1.896E-03 | 3.830E-03 | PB-CAG-SD  |
| PARVB     | parvin, beta [Source:HGNC Symbol;Acc:14653]                                                                  | 22    | 44390091  | 44565106  | 528           | 0.063    | 1        | 1         | 1.913E-03 | 3.854E-03 | PB-CAG-SD  |
| SM1       | single-minded homolog 1 (Drosophila) [Source:HGNC Symbol;Acc:10882]                                          | 6     | 100832891 | 100917805 | 637           | 0.063    | 1        | 1         | 1.191E-03 | 3.887E-03 | PB-CAG-SD  |
| CHODL-AS1 | CHODL antisense RNA 1 [Source:HGNC Symbol;Acc:1279]                                                          | 2     | 19207333  | 19229225  | 437           | 0.063    | 1        | 1         | 1.938E-03 | 3.899E-03 | PB-CAG-SD  |
| TTC28     | tetratricopeptide repeat domain 26 [Source:HGNC Symbol;Acc:21882]                                            | 7     | 138813490 | 138876732 | 529           | 0.063    | 1        | 1         | 1.831E-03 | 3.869E-03 | PB-CAG-SD  |
| UBE2U     | ubiquitin-conjugating enzyme E2U (putative) [Source:HGNC Symbol;Acc:28559]                                   | 1     | 64664310  | 64733053  | 524           | 0.063    | 1        | 1         | 1.931E-03 | 3.869E-03 | PB-CAG-SD  |
| THBS4     | thrombospondin 4 [Source:HGNC Symbol;Acc:11788]                                                              | 5     | 79282134  | 79379110  | 604           | 0.064    | 1        | 1         | 1.973E-03 | 3.945E-03 | PB-CAG-SD  |
| SLC1A3    | solute carrier family 1 (glial high affinity glutamate transporter), member 3 [Source:HGNC Symbol;Acc:10941] | 8     | 36601457  | 36889436  | 609           | 0.065    | 1        | 1         | 2.005E-03 | 4.003E-03 | PB-CAG-SD  |
| NA25      | (N)alpha-steryltransferase 25, Nalb auxiliary subunit [Source:HGNC Symbol;Acc:25783]                         | 12    | 112464500 | 112551826 | 560           | 0.065    | 1        | 1         | 2.013E-03 | 4.013E-03 | PB-CAG-SD  |
| PTPN3     | protein tyrosine phosphatase, non-receptor type 3 [Source:HGNC Symbol;Acc:9655]                              | 9     | 112137746 | 112265990 | 661           | 0.065    | 1        | 1         | 2.033E-03 | 4.045E-03 | PB-CAG-SD  |
| ACTR3     | ARF3 actin-related protein 3 homolog (yeast) [Source:HGNC Symbol;Acc:170]                                    | 2     | 114642537 | 114720173 | 716           | 0.065    | 1        | 1         | 2.037E-03 | 4.047E-03 | PB-CAG-SD  |
| FXKL5     | F-box and leucine-rich repeat protein 5 [Source:HGNC Symbol;Acc:13602]                                       | 4     | 15606162  | 15688342  | 751           | 0.066    | 1        | 1         | 2.100E-03 | 4.166E-03 | PB-CAG-SD  |
| EGLN1     | egl nin-like homolog 1 (C. elegans) [Source:HGNC Symbol;Acc:1232]                                            | 1     | 231499487 | 231565700 | 549           | 0.067    | 1        | 1         | 2.116E-03 | 4.189E-03 | PB-CAG-SD  |
| MTF2      | metal response element binding transcription factor 2 [Source:HGNC Symbol;Acc:29535]                         | 1     | 93539792  | 93604638  | 551           | 0.067    | 1        | 1         | 2.131E-03 | 4.201E-03 | PB-CAG-SD  |
| HS2ST1    | heparan sulfate 2-O-sulfotransferase 1 [Source:HGNC Symbol;Acc:5193]                                         | 1     | 87375331  | 87620334  | 2054          | 0.249    | 2        | 2         | 2.132E-03 | 4.201E-03 | PB-CAG-SD  |
| PTPN1     | protein tyrosine phosphatase, non-receptor type 1 [Source:HGNC Symbol;Acc:9642]                              | 20    | 49121891  | 49201299  | 465           | 0.067    | 1        | 1         | 2.135E-03 | 4.201E-03 | PB-CAG-SD  |
| TAS2R1    | taste receptor, type 2, member 1 [Source:HGNC Symbol;Acc:14909]                                              | 5     | 9629109   | 9711490   | 629           | 0.067    | 1        | 1         | 2.136E-03 | 4.201E-03 | PB-CAG-SD  |
| TOPBP1    | topoisomerase (DNA) II binding protein 1 [Source:HGNC Symbol;Acc:17008]                                      | 3     | 133317019 | 133387337 | 562           | 0.067    | 1        | 1         | 2.150E-03 | 4.222E-03 | PB-CAG-SD  |
| RAB7A     | RAB7A, member RAS oncogene family [Source:HGNC Symbol;Acc:9788]                                              | 3     | 128439965 | 128533639 | 563           | 0.067    | 1        | 1         | 2.157E-03 | 4.223E-03 | PB-CAG-SD  |
| SLC37A3   | solute carrier family 37, member 3 [Source:HGNC Symbol;Acc:20651]                                            | 7     | 13998493  | 14010233  | 560           | 0.067    | 1        | 1         | 2.158E-03 | 4.225E-03 | PB-CAG-SD  |
| EJF3E     | eukaryotic translation initiation factor 3, subunit E [Source:HGNC Symbol;Acc:3277]                          | 8     | 105213445 | 105452562 | 2029          | 0.250    | 2        | 2         | 2.166E-03 | 4.233E-03 | PB-CAG-SD  |
| SLOC4C1   | solute carrier organic anion transporter family, member 4C1 [Source:HGNC Symbol;Acc:23612]                   | 5     | 101569690 | 101637253 | 640           | 0.068    | 1        | 1         | 2.209E-03 | 4.311E-03 | PB-CAG-SD  |
| PPP1R13B  | protein phosphatase 1, regulatory subunit 13B [Source:HGNC Symbol;Acc:14950]                                 | 14    | 104200089 | 104318927 | 622           | 0.068    | 1        | 1         | 2.217E-03 | 4.318E-03 | PB-CAG-SD  |
| TMEIM67   | transmembrane protein 67 [Source:HGNC Symbol;Acc:28396]                                                      | 6     | 13998493  | 14010233  | 560           | 0.067    | 1        | 1         | 2.218E-03 | 4.321E-03 | PB-CAG-SD  |
| NUP153    | nucleoporin 153kDa [Source:HGNC Symbol;Acc:8062]                                                             | 6     | 17615289  | 17711656  | 587           | 0.068    | 1        | 1         | 2.225E-03 | 4.321E-03 | PB-CAG-SD  |
| PAPS22    | 3'-phosphoadenosine 5'-phosphosulfate synthase 2 [Source:HGNC Symbol;Acc:8604]                               | 10    | 89414370  | 89507462  | 600           | 0.069    | 1        | 1         | 2.243E-03 | 4.349E-03 | PB-CAG-SD  |
| ETS1      | v-ets avian erythroblastosis virus E26 oncogene homolog 1 [Source:HGNC Symbol;Acc:3488]                      | 11    | 128328656 | 12842437  | 795           | 0.069    | 1        | 1         | 2.287E-03 | 4.427E-03 | PB-CAG-SD  |
| IGF1      | insulin-like growth factor 1 (somatomedin C) [Source:HGNC Symbol;Acc:5464]                                   | 12    | 102789445 | 102879423 | 600           | 0.069    | 1        | 1         | 2.304E-03 | 4.452E-03 | PB-CAG-SD  |
| HDAC2     | histone deacetylase 2 [Source:HGNC Symbol;Acc:4853]                                                          | 4     | 14254192  | 14283472  | 701           | 0.070    | 1        | 1         | 2.315E-03 | 4.466E-03 | PB-CAG-SD  |
| MP27      | membrane protein, palmitoylated 7 (MAGUK p55 subfamily member 7) [Source:HGNC Symbol;Acc:26542]              | 10    | 28339922  | 28286415  | 2246          | 0.257    | 2        | 2         | 2.232E-03 | 4.476E-03 | PB-CAG-SD  |
| NDEL1     | nucleolar distribution E homolog (A. nidulans)-like 1 [Source:HGNC Symbol;Acc:17620]                         | 17    | 8311449   | 8393729   | 456           | 0.070    | 1        | 1         | 2.331E-03 | 4.484E-03 | PB-CAG-SD  |
| BLM1      | Bloom syndrome, RecQ helicase-like [Source:HGNC Symbol;Acc:1058]                                             | 15    | 91255558  | 91358985  | 679           | 0.070    | 1        | 1         | 2.349E-03 | 4.511E-03 | PB-CAG-SD  |
| RA05L2    | RA05-like 2 (S. cerevisiae) [Source:HGNC Symbol;Acc:19123]                                                   | 3     | 91570160  | 91697610  | 589           | 0.070    | 1        | 1         | 2.357E-03 | 4.518E-03 | PB-CAG-SD  |
| PDE7B     | phosphodiesterase 7B [Source:HGNC Symbol;Acc:8792]                                                           | 6     | 136167834 | 136516712 | 2605          | 0.259    | 2        | 2         | 2.381E-03 | 4.557E-03 | PB-CAG-SD  |
| PHKA1     | phosphorylase kinase, alpha 1 (muscle) [Source:HGNC Symbol;Acc:8925]                                         | X     | 71798664  | 71939167  | 1032          | 0.071    | 1        | 1         | 2.391E-03 | 4.569E-03 | PB-CAG-SD  |
| GPR133    | G protein-coupled receptor 133 [Source:HGNC Symbol;Acc:18993]                                                | 12    | 131433452 | 131626014 | 612           | 0.071    | 1        | 1         | 2.395E-03 | 4.569E-03 | PB-CAG-SD  |
| BEND1     | BHLHE40 containing EGF repeats [Source:HGNC Symbol;Acc:23514]                                                | 4     | 13490494  | 13507694  | 621           | 0.071    | 1        | 1         | 2.370E-03 | 4.573E-03 | PB-CAG-SD  |
| FRP1      | formyl peptide receptor 1 [Source:HGNC Symbol;Acc:3826]                                                      | 19    | 25248425  | 25312363  | 326           | 0.071    | 1        | 1         | 2.406E-03 | 4.575E-03 | PB-CAG-SD  |
| VKORC1L1  | vitamin K epoxide reductase complex, subunit 1-like 1 [Source:HGNC Symbol;Acc:21492]                         | 7     | 65332254  | 65424550  | 595           | 0.071    | 1        | 1         | 2.430E-03 | 4.611E-03 | PB-CAG-SD  |
| PTPRR     | protein tyrosine phosphatase, receptor type, R [Source:HGNC Symbol;Acc:9690]                                 | 12    | 17015853  | 17139623  | 2253          | 0.261    | 2        | 2         | 2.435E-03 | 4.611E-03 | PB-CAG-SD  |
| DNAH7     | DNAH domain, heavy chain 7 [Source:HGNC Symbol;Acc:18661]                                                    | 16    | 196602427 | 196832864 | 2894          | 0.264    | 2        | 2         | 2.437E-03 | 4.611E-03 | PB-CAG-SD  |
| UGT8      | UDP glucosyltransferase 8 [Source:HGNC Symbol;Acc:12555]                                                     | 4     | 115514611 | 115599380 | 811           | 0.072    | 1        | 1         | 2.441E-03 | 4.611E-03 | PB-CAG-SD  |
| OXNAD1    | oxido-reductase NAD-binding domain containing 1 [Source:HGNC Symbol;Acc:25128]                               | 3     | 16301706  | 16391806  | 600           | 0.072    | 1        | 1         | 2.443E-03 | 4.611E-03 | PB-CAG-SD  |
| KMCX      | knight hawk homeobox [Source:HGNC Symbol;Acc:23729]                                                          | 10    | 27981804  | 28039980  | 632           | 0.072    | 1        | 1         | 2.483E-03 | 4.676E-03 | PB-CAG-SD  |
| KLHL7     | ketch-like family member 7 [Source:HGNC Symbol;Acc:15646]                                                    | 10    | 23140320  | 23251540  | 602           | 0.072    | 1        | 1         | 2.498E-03 | 4.683E-03 | PB-CAG-SD  |
| TNFRSF19  | tumor necrosis factor receptor superfamily, member 19 [Source:HGNC Symbol;Acc:19151]                         | 13    | 24139509  | 24250232  | 842           | 0.073    | 1        | 1         | 2.517E-03 | 4.712E-03 | PB-CAG-SD  |
| ORC4      | origin recognition complex, subunit 4 [Source:HGNC Symbol;Acc:8490]                                          | 2     | 146891732 | 146874147 | 798           | 0.073    | 1        | 1         | 2.518E-03 | 4.712E-03 | PB-CAG-SD  |
| PTPN8     | phosphatidylinositol transfer protein, beta [Source:HGNC Symbol;Acc:9002]                                    | 22    | 28247657  | 28321122  | 608           | 0.073    | 1        | 1         | 2.520E-03 | 4.712E-03 | PB-CAG-SD  |
| CHRM5     | cholinergic receptor, muscarinic 5 [Source:HGNC Symbol;Acc:8379]                                             | 2     | 94259201  | 94357291  | 704           | 0.073    | 1        | 1         | 2.521E-03 | 4.712E-03 | PB-CAG-SD  |
| XPR1      | xenotropic and polytropic retrovirus receptor 1 [Source:HGNC Symbol;Acc:12827]                               | 1     | 180596140 | 180859387 | 2181          | 0.264    | 2        | 2         | 2.524E-03 | 4.712E-03 | PB-CAG-SD  |
| SLK       | STE20-like kinase [Source:HGNC Symbol;Acc:11088]                                                             | 10    | 105721959 | 105788991 | 642           | 0.073    | 1        | 1         | 2.560E-03 | 4.771E-03 | PB-CAG-SD  |
| ZNF81     | zinc finger protein 81 [Source:HGNC Symbol;Acc:13158]                                                        | X     | 47891301  | 47861960  | 1070          | 0.073    | 1        | 1         | 2.566E-03 | 4.775E-03 | PB-CAG-SD  |
| ARHGGEF11 | Rho guanine nucleotide exchange factor (GEF) 11 [Source:HGNC Symbol;Acc:14580]                               | 4     | 156904432 | 157006632 | 609           | 0.073    | 1        | 1         | 2.548E-03 | 4.775E-03 | PB-CAG-SD  |
| PLXNA4    | plexin A4 [Source:HGNC Symbol;Acc:9102]                                                                      | 7     | 131808091 | 132384447 | 2229          | 0.267    | 2        | 2         | 2.612E-03 | 4.845E-03 | PB-CAG-SD  |
| AKAP12    | A kinase (PKA) anchor protein 12 [Source:HGNC Symbol;Acc:370]                                                | 6     | 151556134 | 151679692 | 750           | 0.074    | 1        | 1         | 2.641E-03 | 4.891E-03 | PB-CAG-SD  |
| DPR19L4   | dpr-19-like 4 (C. elegans) [Source:HGNC Symbol;Acc:27829]                                                    | 8     | 95726931  | 95800604  | 606           | 0.075    | 1        | 1         | 2.656E-03 | 4.912E-03 | PB-CAG-SD  |
| JRKL      | jerkin homolog-like (mouse) [Source:HGNC Symbol;Acc:6200]                                                    | 1     | 96240738  | 96340738  | 604           | 0.075    | 1        | 1         | 2.696E-03 | 4.924E-03 | PB-CAG-SD  |
| SEPT9     | septin 9 [Source:HGNC Symbol;Acc:7323]                                                                       | 17    | 75271651  | 75496678  | 490           | 0.075    | 1        | 1         | 2.683E-03 | 4.937E-03 | PB-CAG-SD  |
| LRMP      | lymphoid-restricted membrane protein [Source:HGNC Symbol;Acc:6690]                                           | 12    | 25168936  | 25261268  | 649           | 0.075    | 1        | 1         | 2.685E-03 | 4.937E-03 | PB-CAG-SD  |
| EGR2      | early growth response 2 [Source:HGNC Symbol;Acc:3239]                                                        | 10    | 64571756  | 64684660  | 658           | 0.075    | 1        | 1         | 2.686E-03 | 4.937E-03 | PB-CAG-SD  |
| RGS21     | regulator of G-protein signaling 21 [Source:HGNC Symbol;Acc:26839]                                           | 10    | 84811212  | 84928112  | 625           | 0.076    | 1        | 1         | 2.722E-03 | 5.016E-03 | PB-CAG-SD  |
| LIN54     | lin-54 homolog (C. elegans) [Source:HGNC Symbol;Acc:25397]                                                   | 4     | 83831124  | 83939079  | 864           | 0.076    | 1        | 1         | 2.761E-03 | 5.061E-03 | PB-CAG-SD  |
| PCGF5     | polycomb group ring finger 5 [Source:HGNC Symbol;Acc:28264]                                                  | 10    | 92974908  | 93044088  | 669           | 0.076    | 1        | 1         | 2.774E-03 | 5.076E-03 | PB-CAG-SD  |
| LINC00887 | long intergenic non-protein coding RNA 887 [Source:HGNC Symbol;Acc:16194]                                    | 20    | 11781111  | 11786363  | 534           | 0.077    | 1        | 1         | 2.778E-03 | 5.111E-03 | PB-CAG-SD  |
| PF4R2     | peroxisomal phosphatase 4, regulatory subunit 2 [Source:HGNC Symbol;Acc:16286]                               | 2     | 73049936  | 73153956  | 644           | 0.077    | 1        | 1         | 2.791E-03 | 5.136E-03 | PB-CAG-SD  |
| PEX7      | peroxisomal biogenesis factor 7 [Source:HGNC Symbol;Acc:8660]                                                | 6     | 137138717 | 137325075 | 776           | 0.077    | 1        | 1         | 2.822E-03 | 5.136E-03 | PB-CAG-SD  |
| INTU      | inturned planar cell polarity protein [Source:HGNC Symbol;Acc:29239]                                         | 4     | 128539426 | 128637930 | 874           | 0.077    | 1        | 1         | 2.824E-03 | 5.136E-03 | PB-CAG-SD  |
| TNMF3     | TNFAIP3 interacting protein [Source:HGNC Symbol;Acc:19315]                                                   | 12    | 122052562 | 122153621 | 875           | 0.077    | 1        | 1         | 2.830E-03 | 5.140E-03 | PB-CAG-SD  |
| ZNF451    | zinc finger protein 451 [Source:HGNC Symbol;Acc:2109]                                                        | 4     | 68946642  | 69046642  | 735           | 0.077    | 1        | 1         | 2.886E-03 | 5.144E-03 | PB-CAG-SD  |
| TNFRSF19  | tumor necrosis factor receptor superfamily, member 19 [Source:HGNC Symbol;Acc:19151]                         | 13    | 24139509  | 24250232  | 842           | 0.078    | 1        | 1         | 2.901E-03 | 5.252E-03 | PB-CAG-SD  |
| OSTN      | osteonin [Source:HGNC Symbol;Acc:29861]                                                                      | 3     | 190912030 | 190983404 | 658           | 0.079    | 1        | 1         | 2.925E-03 | 5.282E-03 | PB-CAG-SD  |
| NFB       | nuclear factor I/B [Source:HGNC Symbol;Acc:7765]                                                             | 9     | 14081842  | 14403982  | 2835          | 0.279    | 2        | 2         | 2.954E-03 | 5.333E-03 | PB-CAG-SD  |
| RHO GAP25 | Rho GTPase activating protein 25 [Source:HGNC Symbol;Acc:28951]                                              | 3     | 88901733  | 89034605  | 669           | 0.079    | 1        | 1         | 2.956E-03 | 5.333E-03 | PB-CAG-SD  |
| PDCD6IP   | programmed cell death 6 interacting protein [Source:HGNC Symbol;Acc:8766]                                    | 3     | 33834844  | 33911134  | 663           | 0.079    | 1        | 1         | 2.988E-03 | 5.342E-03 | PB-CAG-SD  |
| RAB27A    | RAB27A, member RAS oncogene family [Source:HGNC Symbol;Acc:9766]                                             | 15    | 55495164  | 55616311  | 767           | 0.079    | 1        | 1         | 2.980E-03 | 5.355E-03 | PB-CAG-SD  |
| MIER1     | mesoderm induction early response 1 homolog (Xenopus laevis) [Source:HGNC Symbol;Acc:29657]                  | 1     |           |           |               |          |          |           |           |           |            |

**table S2. Genes with significant transposon integrations in RKO BRAF<sup>WT</sup> cells after selection in low glucose medium**

| Gene ID        | Description                                                                                             | Chrom | Start     | End       | # TAA sites | Expected | Observed | Libraries | P          | FDR       | Transposon |
|----------------|---------------------------------------------------------------------------------------------------------|-------|-----------|-----------|-------------|----------|----------|-----------|------------|-----------|------------|
| PPAP2A         | phosphatidic acid phosphatase type 2A [Source:HGNC Symbol;Acc:9228]                                     | 5     | 54720682  | 54835978  | 884         | 0.094    | 1        | 1         | 4.143E-03  | 6.815E-03 | PB-CAG-SD  |
| LEMD3          | 13 domain containing 3 [Source:HGNC Symbol;Acc:28687]                                                   | 13    | 65533551  | 65533551  | 813         | 0.094    | 1        | 1         | 4.161E-03  | 6.835E-03 | PB-CAG-SD  |
| GSAP           | gamma-secrectase activating protein [Source:HGNC Symbol;Acc:28042]                                      | 7     | 76940088  | 77050717  | 786         | 0.094    | 1        | 1         | 4.176E-03  | 6.850E-03 | PB-CAG-SD  |
| GOLM4          | golgi integral membrane protein 4 [Source:HGNC Symbol;Acc:15448]                                        | 3     | 16772645  | 16781873  | 791         | 0.094    | 1        | 1         | 4.183E-03  | 6.852E-03 | PB-CAG-SD  |
| PPP1R42        | protein phosphatase 1, regulatory subunit 42 [Source:HGNC Symbol;Acc:33732]                             | 8     | 67876334  | 67979339  | 767         | 0.095    | 1        | 1         | 4.199E-03  | 6.870E-03 | PB-CAG-SD  |
| SLC9C2         | solute carrier family 9, member C2 (putative) [Source:HGNC Symbol;Acc:28664]                            | 3     | 173469003 | 173577233 | 784         | 0.095    | 1        | 1         | 4.224E-03  | 6.916E-03 | PB-CAG-SD  |
| PDZD8          | PDZ domain containing 8 [Source:HGNC Symbol;Acc:26974]                                                  | 10    | 119040000 | 119139978 | 833         | 0.095    | 1        | 1         | 4.248E-03  | 6.930E-03 | PB-CAG-SD  |
| RHOBTB3        | Rho-related BTB domain containing 3 [Source:HGNC Symbol;Acc:18757]                                      | 5     | 95044226  | 95160087  | 897         | 0.095    | 1        | 1         | 4.262E-03  | 6.939E-03 | PB-CAG-SD  |
| ARL13B         | ADP-ribosylation factor-like 13B [Source:HGNC Symbol;Acc:25419]                                         | 3     | 93639983  | 93774512  | 799         | 0.095    | 1        | 1         | 4.265E-03  | 6.939E-03 | PB-CAG-SD  |
| EC12           | epithelial cell transforming sequence 2 oncogene [Source:HGNC Symbol;Acc:3155]                          | 3     | 17245472  | 17253264  | 800         | 0.095    | 1        | 1         | 4.275E-03  | 6.947E-03 | PB-CAG-SD  |
| GABRB1         | gamma-aminobutyric acid (GABA) A receptor, beta 1 [Source:HGNC Symbol;Acc:4081]                         | 4     | 46990740  | 47428461  | 3621        | 0.319    | 2        | 2         | 4.284E-03  | 6.951E-03 | PB-CAG-SD  |
| CNST           | consortin, connexin sorting protein [Source:HGNC Symbol;Acc:26486]                                      | 3     | 24672746  | 24683186  | 792         | 0.096    | 1        | 1         | 4.318E-03  | 6.987E-03 | PB-CAG-SD  |
| ZNF670         | zinc finger protein 670 [Source:HGNC Symbol;Acc:29187]                                                  | 1     | 247108849 | 247274113 | 792         | 0.096    | 1        | 1         | 4.318E-03  | 6.987E-03 | PB-CAG-SD  |
| DCAF2L         | DDI1 and CUL4 associated factor 8-like 2 [Source:HGNC Symbol;Acc:31811]                                 | X     | 27634999  | 27766908  | 1411        | 0.097    | 1        | 1         | 4.334E-03  | 7.101E-03 | PB-CAG-SD  |
| ZMYND8         | zinc finger, MYND-type containing 8 [Source:HGNC Symbol;Acc:9397]                                       | 20    | 45837859  | 45990567  | 675         | 0.097    | 1        | 1         | 4.410E-03  | 7.118E-03 | PB-CAG-SD  |
| CELFA          | CUGBP, Elav-like family member 4 [Source:HGNC Symbol;Acc:14015]                                         | 18    | 34823010  | 35151000  | 979         | 0.097    | 1        | 1         | 4.419E-03  | 7.119E-03 | PB-CAG-SD  |
| KDM5A          | lysine (K)-specific demethylase 5A [Source:HGNC Symbol;Acc:9886]                                        | 12    | 3829925   | 503620    | 839         | 0.097    | 1        | 1         | 4.423E-03  | 7.119E-03 | PB-CAG-SD  |
| RNF216         | ring finger protein 216 [Source:HGNC Symbol;Acc:21692]                                                  | 7     | 5653667   | 5625370   | 811         | 0.097    | 1        | 1         | 4.437E-03  | 7.133E-03 | PB-CAG-SD  |
| ADAMTS8        | ADAM metalloproteinase with thrombospondin type 1 motif 8 [Source:HGNC Symbol;Acc:222]                  | 5     | 64445563  | 64782747  | 3048        | 0.324    | 2        | 2         | 4.447E-03  | 7.140E-03 | PB-CAG-SD  |
| TACC1          | transforming, acidic coiled-coil containing protein 1 [Source:HGNC Symbol;Acc:11522]                    | 8     | 38580704  | 38710546  | 791         | 0.098    | 1        | 1         | 4.458E-03  | 7.146E-03 | PB-CAG-SD  |
| XP04           | exportin 4 [Source:HGNC Symbol;Acc:17790]                                                               | 13    | 21351469  | 21782187  | 1134        | 0.098    | 1        | 1         | 4.490E-03  | 7.189E-03 | PB-CAG-SD  |
| ORC5           | origin recognition complex, subunit 5 [Source:HGNC Symbol;Acc:8491]                                     | 7     | 10371678  | 103853495 | 817         | 0.098    | 1        | 1         | 4.501E-03  | 7.197E-03 | PB-CAG-SD  |
| NUF2           | NUF2, NDC80 kinetochore complex component [Source:HGNC Symbol;Acc:14621]                                | 1     | 163231366 | 163325554 | 812         | 0.098    | 1        | 1         | 4.531E-03  | 7.219E-03 | PB-CAG-SD  |
| EHMT1          | euchromatic histone-lysine N-methyltransferase [Source:HGNC Symbol;Acc:14650]                           | 9     | 140508444 | 140764468 | 998         | 0.098    | 1        | 1         | 4.533E-03  | 7.219E-03 | PB-CAG-SD  |
| DYX1C1-CPGP1   | DYX1C1-CPGP1 readthrough (NMD candidate) [Source:HGNC Symbol;Acc:43019]                                 | 15    | 65647446  | 55795588  | 962         | 0.098    | 1        | 1         | 4.533E-03  | 7.219E-03 | PB-CAG-SD  |
| GTRNL3         | GTP-binding activator/RapRapGAP domain-like 3 [Source:HGNC Symbol;Acc:25425]                            | 10    | 129891544 | 13004900  | 1004        | 0.099    | 1        | 1         | 4.586E-03  | 7.249E-03 | PB-CAG-SD  |
| SESN1          | sesatin 1 [Source:HGNC Symbol;Acc:21595]                                                                | 6     | 109370640 | 109421022 | 1000        | 0.099    | 1        | 1         | 4.618E-03  | 7.335E-03 | PB-CAG-SD  |
| HSF2BP         | heat shock transcription factor 2 binding protein [Source:HGNC Symbol;Acc:5226]                         | 21    | 44949072  | 45084374  | 686         | 0.100    | 1        | 1         | 4.639E-03  | 7.360E-03 | PB-CAG-SD  |
| FKBP5          | FK506 binding protein 5 [Source:HGNC Symbol;Acc:3721]                                                   | 6     | 35541362  | 35701360  | 1004        | 0.100    | 1        | 1         | 4.654E-03  | 7.373E-03 | PB-CAG-SD  |
| CFP192         | centrosomal protein 192kDa [Source:HGNC Symbol;Acc:25515]                                               | 18    | 12963861  | 13125051  | 907         | 0.100    | 1        | 1         | 4.667E-03  | 7.383E-03 | PB-CAG-SD  |
| CRY1           | cryptochrome 1 (photolyase-like) [Source:HGNC Symbol;Acc:2384]                                          | 12    | 107365142 | 10749293  | 867         | 0.100    | 1        | 1         | 4.682E-03  | 7.405E-03 | PB-CAG-SD  |
| KSR1           | kinase suppressor of ras 1 [Source:HGNC Symbol;Acc:6465]                                                | 17    | 25778670  | 25953461  | 656         | 0.101    | 1        | 1         | 4.728E-03  | 7.445E-03 | PB-CAG-SD  |
| GRIN2B         | glutamate receptor, ionotropic, N-methyl D-aspartate 2B [Source:HGNC Symbol;Acc:4586]                   | 12    | 13714144  | 14138053  | 2860        | 0.331    | 2        | 2         | 4.730E-03  | 7.445E-03 | PB-CAG-SD  |
| RFC3           | replication factor C (activator 1), 3, 38kDa [Source:HGNC Symbol;Acc:9971]                              | 13    | 34387188  | 34540895  | 1165        | 0.101    | 1        | 1         | 4.730E-03  | 7.445E-03 | PB-CAG-SD  |
| ANKRD13C       | ankyrin repeat domain 13C [Source:HGNC Symbol;Acc:25374]                                                | 7     | 70726271  | 70829417  | 812         | 0.101    | 1        | 1         | 4.750E-03  | 7.466E-03 | PB-CAG-SD  |
| SHROOM4        | shroom family member 4 [Source:HGNC Symbol;Acc:29215]                                                   | X     | 50334647  | 50562302  | 1472        | 0.101    | 1        | 1         | 4.769E-03  | 7.482E-03 | PB-CAG-SD  |
| ADCY9          | adenylyl cyclase 9 [Source:HGNC Symbol;Acc:240]                                                         | 16    | 4003388   | 4171186   | 774         | 0.101    | 1        | 1         | 4.774E-03  | 7.482E-03 | PB-CAG-SD  |
| RGS17          | regulator of G-protein signaling 17 [Source:HGNC Symbol;Acc:14088]                                      | 6     | 153326594 | 153457384 | 1018        | 0.101    | 1        | 1         | 4.780E-03  | 7.482E-03 | PB-CAG-SD  |
| CGNL1          | cuticle-like 1 [Source:HGNC Symbol;Acc:26931]                                                           | 5     | 5766315   | 57842925  | 979         | 0.101    | 1        | 1         | 4.785E-03  | 7.482E-03 | PB-CAG-SD  |
| MSANTD3-TMEFF1 | MSANTD3-TMEFF1 readthrough [Source:HGNC Symbol;Acc:38838]                                               | 9     | 103199553 | 103339818 | 1030        | 0.102    | 1        | 1         | 4.818E-03  | 7.514E-03 | PB-CAG-SD  |
| TMEFF1         | transmembrane protein with EGF-like and two follistatin-like domains 1 [Source:HGNC Symbol;Acc:11866]   | 9     | 103199560 | 103339818 | 1030        | 0.102    | 1        | 1         | 4.818E-03  | 7.514E-03 | PB-CAG-SD  |
| FERL1L6-AS2    | FERL1L6 antisense RNA 2 [Source:HGNC Symbol;Acc:26534]                                                  | 9     | 125058314 | 125188703 | 824         | 0.102    | 1        | 1         | 4.824E-03  | 7.514E-03 | PB-CAG-SD  |
| TNRC18A        | triple helix repeat containing 18A [Source:HGNC Symbol;Acc:11969]                                       | 16    | 24736016  | 24839953  | 789         | 0.102    | 1        | 1         | 4.834E-03  | 7.514E-03 | PB-CAG-SD  |
| TPPED1         | calcineurin-like phosphatohistidine domain containing 1 [Source:HGNC Symbol;Acc:25632]                  | 16    | 12756919  | 12802874  | 781         | 0.102    | 1        | 1         | 4.857E-03  | 7.546E-03 | PB-CAG-SD  |
| ROR1           | receptor tyrosine kinase-like orphan receptor 1 [Source:HGNC Symbol;Acc:10256]                          | 1     | 64234693  | 64467181  | 2788        | 0.338    | 2        | 2         | 4.994E-03  | 7.748E-03 | PB-CAG-SD  |
| PKCRR3         | phosphoinositide-3-kinase, regulatory subunit 3 (gamma) [Source:HGNC Symbol;Acc:8981]                   | 1     | 46505812  | 46447160  | 856         | 0.104    | 1        | 1         | 5.018E-03  | 7.776E-03 | PB-CAG-SD  |
| SCAMP1         | scamp carrier protein 1 [Source:HGNC Symbol;Acc:10563]                                                  | 5     | 77651339  | 77806927  | 963         | 0.105    | 1        | 1         | 5.088E-03  | 7.874E-03 | PB-CAG-SD  |
| MYOF           | myoferlin [Source:HGNC Symbol;Acc:3656]                                                                 | 10    | 90566186  | 9247074   | 920         | 0.105    | 1        | 1         | 5.148E-03  | 7.956E-03 | PB-CAG-SD  |
| ARHGAP11B      | Rho GTPase activating protein 11B [Source:HGNC Symbol;Acc:15782]                                        | 15    | 30911697  | 31065196  | 1018        | 0.105    | 1        | 1         | 5.160E-03  | 7.965E-03 | PB-CAG-SD  |
| MTRFR7         | myotubularin related protein 7 [Source:HGNC Symbol;Acc:7454]                                            | 8     | 17155539  | 17276037  | 860         | 0.106    | 1        | 1         | 5.240E-03  | 8.077E-03 | PB-CAG-SD  |
| C1orf82        | chromosome 16 open reading frame 82 [Source:HGNC Symbol;Acc:24644]                                      | 16    | 18591692  | 18714515  | 814         | 0.106    | 1        | 1         | 5.1012E-03 | 8.077E-03 | PB-CAG-SD  |
| RTN4           | reticulon 4 [Source:HGNC Symbol;Acc:14065]                                                              | 2     | 55199325  | 55344757  | 1181        | 0.108    | 1        | 1         | 5.389E-03  | 8.286E-03 | PB-CAG-SD  |
| ABI1           | abi-1-interactor 1 [Source:HGNC Symbol;Acc:11320]                                                       | 10    | 27035522  | 27155016  | 946         | 0.108    | 1        | 1         | 5.432E-03  | 8.337E-03 | PB-CAG-SD  |
| FRMD6-AS2      | FRMD6 antisense RNA 2 [Source:HGNC Symbol;Acc:43637]                                                    | 14    | 51921230  | 52071670  | 987         | 0.108    | 1        | 1         | 5.435E-03  | 8.337E-03 | PB-CAG-SD  |
| LRRC8B         | leucine-rich containing 8 family, member B [Source:HGNC Symbol;Acc:16992]                               | 13    | 90257573  | 90492807  | 858         | 0.108    | 1        | 1         | 5.453E-03  | 8.358E-03 | PB-CAG-SD  |
| NUP93          | nucleoporin 93kDa [Source:HGNC Symbol;Acc:29585]                                                        | 16    | 56759107  | 5687797   | 830         | 0.108    | 1        | 1         | 5.453E-03  | 8.358E-03 | PB-CAG-SD  |
| PCDH7          | protocadherin 7 [Source:HGNC Symbol;Acc:8659]                                                           | 4     | 30717037  | 31148422  | 3978        | 0.351    | 2        | 2         | 5.550E-03  | 8.480E-03 | PB-CAG-SD  |
| BTF1           | BTF1 RNA polymerase II, B-TFIIID transcription factor-associated, 170kDa [Source:HGNC Symbol;Acc:17307] | 10    | 93878526  | 93790082  | 965         | 0.110    | 1        | 1         | 5.644E-03  | 8.610E-03 | PB-CAG-SD  |
| ATM            | ataxia telangiectasia mutated [Source:HGNC Symbol;Acc:2300]                                             | 2     | 680938211 | 68209929  | 1268        | 0.110    | 1        | 1         | 5.682E-03  | 8.620E-03 | PB-CAG-SD  |
| CHM            | choroideremia (Rab escort protein), 1A [Source:HGNC Symbol;Acc:1940]                                    | X     | 85116185  | 85307566  | 1610        | 0.110    | 1        | 1         | 5.689E-03  | 8.620E-03 | PB-CAG-SD  |
| BAZ1A          | bromodomain adjacent to zinc finger domain, 1A [Source:HGNC Symbol;Acc:960]                             | 14    | 35221937  | 35349883  | 1009        | 0.110    | 1        | 1         | 5.671E-03  | 8.620E-03 | PB-CAG-SD  |
| TNIK           | TRAF2 and NCK interacting kinase [Source:HGNC Symbol;Acc:30765]                                         | 3     | 710779128 | 711183197 | 2968        | 0.354    | 2        | 2         | 5.678E-03  | 8.620E-03 | PB-CAG-SD  |
| XRCC9          | X-ray cross-curing complementing factor 9 family, member B [Source:HGNC Symbol;Acc:20937]               | 7     | 61576600  | 61576600  | 826         | 0.110    | 1        | 1         | 5.695E-03  | 8.636E-03 | PB-CAG-SD  |
| FTU1           | elongation factor T1 GTP binding domain containing 1 [Source:HGNC Symbol;Acc:25789]                     | 15    | 84222571  | 82560104  | 1079        | 0.111    | 1        | 1         | 5.773E-03  | 8.743E-03 | PB-CAG-SD  |
| DDR2           | discoidin domain receptor tyrosine kinase 2 [Source:HGNC Symbol;Acc:2731]                               | 1     | 162969163 | 162703273 | 923         | 0.112    | 1        | 1         | 5.803E-03  | 8.778E-03 | PB-CAG-SD  |
| MYBP1C         | myosin binding protein C, slow type [Source:HGNC Symbol;Acc:7548]                                       | 12    | 101957131 | 102079396 | 974         | 0.113    | 1        | 1         | 5.900E-03  | 8.908E-03 | PB-CAG-SD  |
| PKHD1          | polycystic kidney and liver disease 1 (autosomal recessive) [Source:HGNC Symbol;Acc:9016]               | 5     | 61480098  | 61507423  | 380         | 0.113    | 2        | 2         | 6.004E-03  | 9.080E-03 | PB-CAG-SD  |
| TRIM2          | tripartite motif containing 2 [Source:HGNC Symbol;Acc:15974]                                            | 4     | 104606494 | 104620472 | 1280        | 0.113    | 1        | 1         | 5.916E-03  | 8.914E-03 | PB-CAG-SD  |
| KMT2E          | lysine (K)-specific methyltransferase 2E [Source:HGNC Symbol;Acc:18541]                                 | 7     | 104649626 | 104758008 | 945         | 0.113    | 1        | 1         | 5.961E-03  | 8.971E-03 | PB-CAG-SD  |
| KCNQ1          | potassium voltage-gated channel, KQT-like subfamily, member 1 [Source:HGNC Symbol;Acc:6294]             | 11    | 2460914   | 2870339   | 1322        | 0.115    | 1        | 1         | 6.135E-03  | 9.222E-03 | PB-CAG-SD  |
| CLTC           | clathrin heavy chain [Source:HGNC Symbol;Acc:2092]                                                      | 11    | 67692219  | 6782319   | 763         | 0.115    | 1        | 1         | 6.253E-03  | 9.365E-03 | PB-CAG-SD  |
| STIM1          | stromal interaction molecule 1 [Source:HGNC Symbol;Acc:11386]                                           | 11    | 3870757   | 4114439   | 1326        | 0.115    | 1        | 1         | 6.171E-03  | 9.253E-03 | PB-CAG-SD  |
| ANXK1          | F-box and WD repeat domain containing 11 [Source:HGNC Symbol;Acc:13607]                                 | 5     | 171288553 | 171348877 | 1093        | 0.116    | 1        | 1         | 6.242E-03  | 9.340E-03 | PB-CAG-SD  |
| ANK1           | ankyrin 1, erythrocyte [Source:HGNC Symbol;Acc:492]                                                     | 8     | 41510739  | 41759280  | 942         | 0.116    | 1        | 1         | 6.245E-03  | 9.340E-03 | PB-CAG-SD  |
| SNRK           | snRNA kinase [Source:HGNC Symbol;Acc:30568]                                                             | 9     | 43329304  | 43362566  | 967         | 0.117    | 1        | 1         | 6.288E-03  | 9.382E-03 | PB-CAG-SD  |
| FBXL2          | F-box and leucine-rich repeat protein 2 [Source:HGNC Symbol;Acc:13598]                                  | 3     | 33313517  | 33445154  | 977         | 0.117    | 1        | 1         | 6.288E-03  | 9.382E-03 | PB-CAG-SD  |
| DENN4D         | DENN/MADD domain containing 4C [Source:HGNC Symbol;Acc:26079]                                           | 9     | 19225433  | 19374319  | 1184        | 0.117    | 1        | 1         | 6.303E-03  | 9.392E-03 | PB-CAG-SD  |
| ZNF827         | zinc finger protein 827 [Source:HGNC Symbol;Acc:27193]                                                  | 4     | 146687879 | 146884    |             |          |          |           |            |           |            |

table S2. Genes with significantly transposon integrations in RKO BRAF<sup>mut</sup> cells after selection in low glucose medium

| Gene ID       | Description                                                                                                                      | Chrom | Start     | End        | # TAA sites | Expected | Observed | Libraries | P         | FDR       | Transposon |
|---------------|----------------------------------------------------------------------------------------------------------------------------------|-------|-----------|------------|-------------|----------|----------|-----------|-----------|-----------|------------|
| ADAM10        | ADAM metalloprotease domain 10 [Source:HGNC Symbol;Acc:188]                                                                      | 15    | 58887403  | 59047177   | 1382        | 0.143    | 1        | 1         | 0.277E-03 | 1.284E-02 | PB-CAG-SD  |
| SEL1L2        | selectin receptor of lin-22 type 2 (C. elegans) [Source:HGNC Symbol;Acc:15897]                                                   | 20    | 8526993   | 13262693   | 905         | 0.143    | 1        | 1         | 0.298E-03 | 1.359E-02 | PB-CAG-SD  |
| LGR5          | leucine-rich repeat containing G protein-coupled receptor 5 [Source:HGNC Symbol;Acc:4504]                                        | 12    | 71828550  | 71880050   | 1236        | 0.143    | 1        | 1         | 0.312E-03 | 1.286E-02 | PB-CAG-SD  |
| HFM1          | HFM1, ATP-dependent DNA helicase homolog (S. cerevisiae) [Source:HGNC Symbol;Acc:20193]                                          | 1     | 91726323  | 91875426   | 1184        | 0.143    | 1        | 1         | 0.352E-03 | 1.290E-02 | PB-CAG-SD  |
| ZZZ2          | zinc finger, ZZ-type domain 3 [Source:HGNC Symbol;Acc:24523]                                                                     | 1     | 78028101  | 78154104   | 1189        | 0.144    | 1        | 1         | 0.427E-03 | 1.299E-02 | PB-CAG-SD  |
| PLCX22A       | phosphatidylinositol-specific phospholipase C, X domain containing 2 [Source:HGNC Symbol;Acc:26462]                              | 2     | 113585323 | 113585324  | 1213        | 0.145    | 1        | 1         | 0.915E-03 | 1.309E-02 | PB-CAG-SD  |
| RFTN1         | raftlin, lipid raft linker 1 [Source:HGNC Symbol;Acc:30278]                                                                      | 3     | 16355081  | 16560353   | 1214        | 0.145    | 1        | 1         | 0.930E-03 | 1.310E-02 | PB-CAG-SD  |
| NMD3          | NMD3 homolog (S. cerevisiae) [Source:HGNC Symbol;Acc:24250]                                                                      | 3     | 160817484 | 160971320  | 1219        | 0.145    | 1        | 1         | 0.960E-03 | 1.319E-02 | PB-CAG-SD  |
| CCDC59        | coiled-coil domain containing 59 [Source:HGNC Symbol;Acc:29055]                                                                  | 12    | 82617460  | 82757584   | 1261        | 0.146    | 1        | 1         | 0.874E-03 | 1.327E-02 | PB-CAG-SD  |
| DT1           | D-lysine-RNA deacylase 1 [Source:HGNC Symbol;Acc:16219]                                                                          | 2     | 18553537  | 18744561   | 1020        | 0.147    | 1        | 1         | 1.974E-03 | 1.335E-02 | PB-CAG-SD  |
| SMARCC1       | SMN/INR related, matrix associated, actin dependent regulator of chromatin, subfamily c, member 1 [Source:HGNC Symbol;Acc:17870] | 9     | 102865538 | 103063282  | 1497        | 0.148    | 1        | 1         | 0.874E-03 | 1.348E-02 | PB-CAG-SD  |
| PPP2R2        | protein phosphatase 2, regulatory subunit B', epsilon isoform [Source:HGNC Symbol;Acc:9313]                                      | 14    | 63838075  | 64015092   | 1348        | 0.148    | 1        | 1         | 0.878E-03 | 1.348E-02 | PB-CAG-SD  |
| C10orf101     | chromosome 10 open reading frame 101 [Source:HGNC Symbol;Acc:23491]                                                              | 15    | 244612879 | 244804479  | 1233        | 0.149    | 1        | 1         | 1.010E-02 | 1.378E-02 | PB-CAG-SD  |
| AXND1         | axonal domain light chain domain containing 1 [Source:HGNC Symbol;Acc:26564]                                                     | 1     | 179329855 | 179523870  | 1237        | 0.150    | 1        | 1         | 1.017E-02 | 1.384E-02 | PB-CAG-SD  |
| DNAH3         | dynein, axonemal, heavy chain 3 [Source:HGNC Symbol;Acc:2949]                                                                    | 16    | 20944433  | 21175762   | 1150        | 0.150    | 1        | 1         | 1.020E-02 | 1.388E-02 | PB-CAG-SD  |
| ANKRD31       | ankyrin repeat domain 31 [Source:HGNC Symbol;Acc:26853]                                                                          | 5     | 74364100  | 74537703   | 1414        | 0.150    | 1        | 1         | 1.021E-02 | 1.388E-02 | PB-CAG-SD  |
| GRIA3         | glutamate receptor, ionotropic, AMPA 3 [Source:HGNC Symbol;Acc:4573]                                                             | 1     | 122313006 | 122524766  | 2191        | 0.150    | 1        | 1         | 1.023E-02 | 1.388E-02 | PB-CAG-SD  |
| PKIC3B        | phosphatidylinositol-4,5-bisphosphate 3-kinase, catalytic subunit beta [Source:HGNC Symbol;Acc:8976]                             | 3     | 138372860 | 138558700  | 1281        | 0.150    | 1        | 1         | 1.024E-02 | 1.389E-02 | PB-CAG-SD  |
| CACNB4        | calcium channel, voltage-dependent, beta 4 subunit [Source:HGNC Symbol;Acc:1404]                                                 | 2     | 182888290 | 182960593  | 1659        | 0.151    | 1        | 1         | 1.033E-02 | 1.399E-02 | PB-CAG-SD  |
| STON1-GTF2A11 | STON1-GTF2A11 readthrough [Source:HGNC Symbol;Acc:30651]                                                                         | 2     | 48752064  | 49003854   | 1680        | 0.151    | 1        | 1         | 1.034E-02 | 1.399E-02 | PB-CAG-SD  |
| SLC25A12      | SLC25A12, family 25, aspartate/glutamate carrier, member 12 [Source:HGNC Symbol;Acc:10982]                                       | 1     | 172840360 | 172840360  | 1671        | 0.152    | 1        | 1         | 1.048E-02 | 1.414E-02 | PB-CAG-SD  |
| COL8A1        | collagen, type VIII, alpha 1 [Source:HGNC Symbol;Acc:2215]                                                                       | 3     | 96352319  | 96519070   | 1276        | 0.152    | 1        | 1         | 1.048E-02 | 1.414E-02 | PB-CAG-SD  |
| AOAH          | acyloxyacyl hydrolase (neutrophil) [Source:HGNC Symbol;Acc:548]                                                                  | 7     | 36524546  | 36769154   | 1278        | 0.153    | 1        | 1         | 1.062E-02 | 1.432E-02 | PB-CAG-SD  |
| SPIRE1        | spire homolog 1 (Drosophila) [Source:HGNC Symbol;Acc:30622]                                                                      | 18    | 12446511  | 12663133   | 1551        | 0.154    | 1        | 1         | 1.068E-02 | 1.439E-02 | PB-CAG-SD  |
| WNK1          | WNK, serine deficient protein kinase 1 [Source:HGNC Symbol;Acc:14540]                                                            | 11    | 8526993   | 13262693   | 1330        | 0.155    | 1        | 1         | 1.078E-02 | 1.450E-02 | PB-CAG-SD  |
| ADAM32        | ADAM metalloprotease domain 32 [Source:HGNC Symbol;Acc:15479]                                                                    | 6     | 38959509  | 39142430   | 1254        | 0.155    | 1        | 1         | 1.079E-02 | 1.450E-02 | PB-CAG-SD  |
| SAMD4A        | sterile alpha motif domain containing 4A [Source:HGNC Symbol;Acc:23023]                                                          | 14    | 55028815  | 55260033   | 1418        | 0.155    | 1        | 1         | 1.088E-02 | 1.460E-02 | PB-CAG-SD  |
| GIPC2         | GIPC PDZ domain containing family, member 2 [Source:HGNC Symbol;Acc:18177]                                                       | 1     | 78440226  | 78604133   | 1285        | 0.156    | 1        | 1         | 1.093E-02 | 1.465E-02 | PB-CAG-SD  |
| TBCA          | tubulin folding cofactor A [Source:HGNC Symbol;Acc:11579]                                                                        | 19    | 76989691  | 77169804   | 1467        | 0.156    | 1        | 1         | 1.095E-02 | 1.467E-02 | PB-CAG-SD  |
| NR2F2-AS1     | NR2F2 antisense RNA 1 [Source:HGNC Symbol;Acc:44222]                                                                             | 15    | 96670592  | 96875080   | 1510        | 0.156    | 1        | 1         | 1.098E-02 | 1.468E-02 | PB-CAG-SD  |
| ALDH1A1       | aldehyde dehydrogenase 1 family, member A1 [Source:HGNC Symbol;Acc:402]                                                          | 9     | 75515578  | 75700358   | 1487        | 0.156    | 1        | 1         | 1.103E-02 | 1.474E-02 | PB-CAG-SD  |
| USPNL         | USP6 N-terminal like [Source:HGNC Symbol;Acc:18658]                                                                              | 10    | 11502509  | 11658753   | 1377        | 0.157    | 1        | 1         | 1.114E-02 | 1.487E-02 | PB-CAG-SD  |
| VMP1          | vacuole membrane protein 1 [Source:HGNC Symbol;Acc:29559]                                                                        | 17    | 57179553  | 57391916   | 1031        | 0.158    | 1        | 1         | 1.124E-02 | 1.499E-02 | PB-CAG-SD  |
| SASH1         | SASH and SH3 domain containing 1 [Source:HGNC Symbol;Acc:19182]                                                                  | 1     | 145884440 | 146873186  | 1608        | 0.160    | 1        | 1         | 1.147E-02 | 1.547E-02 | PB-CAG-SD  |
| EML6          | echinoderm microtubule associated protein like 6 [Source:HGNC Symbol;Acc:35412]                                                  | 2     | 54945636  | 55199157   | 1756        | 0.160    | 1        | 1         | 1.151E-02 | 1.531E-02 | PB-CAG-SD  |
| PPP2R3A       | protein phosphatase 2, regulatory subunit B', alpha [Source:HGNC Symbol;Acc:9307]                                                | 3     | 135679515 | 135866733  | 1343        | 0.160    | 1        | 1         | 1.155E-02 | 1.534E-02 | PB-CAG-SD  |
| NEK1          | NIMA-related kinase 1 [Source:HGNC Symbol;Acc:7744]                                                                              | 4     | 170314428 | 170538780  | 1824        | 0.161    | 1        | 1         | 1.164E-02 | 1.545E-02 | PB-CAG-SD  |
| COL22A1       | collagen, type XII, alpha 1 [Source:HGNC Symbol;Acc:22989]                                                                       | 6     | 139604178 | 139604178  | 1310        | 0.162    | 1        | 1         | 1.172E-02 | 1.554E-02 | PB-CAG-SD  |
| SAMD3         | sterile alpha motif domain containing 3 [Source:HGNC Symbol;Acc:21574]                                                           | 6     | 130465460 | 130691570  | 1638        | 0.163    | 1        | 1         | 1.188E-02 | 1.574E-02 | PB-CAG-SD  |
| PVRL3-AS1     | PVRL3 antisense RNA 1 [Source:HGNC Symbol;Acc:40813]                                                                             | 3     | 110612555 | 110795400  | 1369        | 0.163    | 1        | 1         | 1.197E-02 | 1.584E-02 | PB-CAG-SD  |
| FAM49B        | family with sequence similarity 49, member B [Source:HGNC Symbol;Acc:25216]                                                      | 8     | 130851639 | 131034373  | 1330        | 0.164    | 1        | 1         | 1.206E-02 | 1.594E-02 | PB-CAG-SD  |
| DOK9          | diacylglycerol kinase, eta [Source:HGNC Symbol;Acc:2854]                                                                         | 13    | 4269191   | 42839714   | 1807        | 0.165    | 1        | 1         | 1.211E-02 | 1.597E-02 | PB-CAG-SD  |
| DMXL2         | Dmx-like 2 [Source:HGNC Symbol;Acc:2936]                                                                                         | 15    | 51739080  | 51920300   | 1591        | 0.164    | 1        | 1         | 1.212E-02 | 1.596E-02 | PB-CAG-SD  |
| SMG6          | SMG6 nonsense mediated mRNA decay factor [Source:HGNC Symbol;Acc:17809]                                                          | 17    | 1963133   | 21212065   | 1073        | 0.164    | 1        | 1         | 1.213E-02 | 1.596E-02 | PB-CAG-SD  |
| TRPPI1        | trichorhinophalangeal syndrome 1 [Source:HGNC Symbol;Acc:12340]                                                                  | 8     | 116420724 | 116626899  | 3802        | 0.169    | 2        | 2         | 1.213E-02 | 1.596E-02 | PB-CAG-SD  |
| SATB2         | SATB2 homeobox 2 [Source:HGNC Symbol;Acc:16222]                                                                                  | 2     | 200134223 | 200343989  | 1807        | 0.165    | 1        | 1         | 1.215E-02 | 1.600E-02 | PB-CAG-SD  |
| STARD4-AS1    | STARD4 antisense RNA 1 [Source:HGNC Symbol;Acc:44117]                                                                            | 5     | 110842924 | 111074223  | 1553        | 0.165    | 1        | 1         | 1.220E-02 | 1.602E-02 | PB-CAG-SD  |
| NUFAF6        | NADH dehydrogenase (ubiquinone) complex I, assembly factor 6 [Source:HGNC Symbol;Acc:28625]                                      | 8     | 96529799  | 96128883   | 1340        | 0.165    | 1        | 1         | 1.223E-02 | 1.605E-02 | PB-CAG-SD  |
| CNTNBL1       | catenin, beta like 1 [Source:HGNC Symbol;Acc:15879]                                                                              | 20    | 36317408  | 36500531   | 1151        | 0.165    | 1        | 1         | 1.226E-02 | 1.606E-02 | PB-CAG-SD  |
| ITGA1         | integrin, alpha 1 [Source:HGNC Symbol;Acc:25442]                                                                                 | 16    | 52078702  | 52295040   | 1695        | 0.166    | 1        | 1         | 1.230E-02 | 1.608E-02 | PB-CAG-SD  |
| RUNX11        | runx-related transcription factor 1, translocated to, 1 (cyclin D-related) [Source:HGNC Symbol;Acc:1535]                         | 8     | 92867203  | 93120514   | 1353        | 0.167    | 1        | 1         | 1.246E-02 | 1.629E-02 | PB-CAG-SD  |
| RBP1          | recombination signal binding protein for immunoglobulin kappa J region [Source:HGNC Symbol;Acc:5724]                             | 4     | 26160077  | 26436541   | 1895        | 0.167    | 1        | 1         | 1.251E-02 | 1.633E-02 | PB-CAG-SD  |
| CDYL          | chromodomain protein, Y-like [Source:HGNC Symbol;Acc:1811]                                                                       | 6     | 4701393   | 4955785    | 1684        | 0.167    | 1        | 1         | 1.252E-02 | 1.633E-02 | PB-CAG-SD  |
| KLHL32        | kelch-like protein 32 [Source:HGNC Symbol;Acc:21221]                                                                             | 12    | 8736760   | 8736760    | 1698        | 0.167    | 1        | 1         | 1.255E-02 | 1.634E-02 | PB-CAG-SD  |
| ACSM3         | acyl-CoA synthetase medium-chain family member 3 [Source:HGNC Symbol;Acc:10522]                                                  | 16    | 20616565  | 20808903   | 1291        | 0.169    | 1        | 1         | 1.270E-02 | 1.653E-02 | PB-CAG-SD  |
| LINC00693     | long intergenic non-protein coding RNA 693 [Source:HGNC Symbol;Acc:44526]                                                        | 3     | 28611282  | 28799331   | 1425        | 0.170    | 1        | 1         | 1.291E-02 | 1.678E-02 | PB-CAG-SD  |
| OKI           | OKI, KH domain containing, RNA binding [Source:HGNC Symbol;Acc:21100]                                                            | 6     | 163830032 | 163999628  | 1712        | 0.170    | 1        | 1         | 1.292E-02 | 1.678E-02 | PB-CAG-SD  |
| CPH1          | CPH1, mitochondrial [Source:HGNC Symbol;Acc:2323]                                                                                | 12    | 11135496  | 11135496   | 1871        | 0.171    | 1        | 1         | 1.298E-02 | 1.684E-02 | PB-CAG-SD  |
| PLCXD3        | phosphatidylinositol-specific phospholipase C, X domain containing 3 [Source:HGNC Symbol;Acc:31822]                              | 5     | 41307056  | 41515730   | 1613        | 0.171    | 1        | 1         | 1.311E-02 | 1.699E-02 | PB-CAG-SD  |
| DOCK9         | dedicator of cytokinesis 9 [Source:HGNC Symbol;Acc:14132]                                                                        | 13    | 99445741  | 99743879   | 2000        | 0.173    | 1        | 1         | 1.329E-02 | 1.721E-02 | PB-CAG-SD  |
| CTNBP2        | cortactin binding protein 2 [Source:HGNC Symbol;Acc:15679]                                                                       | 7     | 17350705  | 17351913   | 1440        | 0.173    | 1        | 1         | 1.331E-02 | 1.721E-02 | PB-CAG-SD  |
| C8orf45-SGK3  | C8orf45-SGK3 [Source:HGNC Symbol;Acc:15224]                                                                                      | 8     | 67574831  | 67574831   | 1402        | 0.173    | 1        | 1         | 1.337E-02 | 1.727E-02 | PB-CAG-SD  |
| UBR5          | ubiquitin protein ligase E3 component n-recognin 5 [Source:HGNC Symbol;Acc:16806]                                                | 8     | 103265240 | 103430069  | 1403        | 0.173    | 1        | 1         | 1.334E-02 | 1.727E-02 | PB-CAG-SD  |
| PKP4          | plakophilin 4 [Source:HGNC Symbol;Acc:9026]                                                                                      | 2     | 159308476 | 159539391  | 1904        | 0.173    | 1        | 1         | 1.341E-02 | 1.729E-02 | PB-CAG-SD  |
| TGFB3         | transforming growth factor, beta receptor II [Source:HGNC Symbol;Acc:11774]                                                      | 12    | 92145902  | 92370892   | 1436        | 0.174    | 1        | 1         | 1.348E-02 | 1.736E-02 | PB-CAG-SD  |
| TA3           | TA3, TATA box binding protein (TBP) associated factor, 10kDa [Source:HGNC Symbol;Acc:17303]                                      | 10    | 76554697  | 76554697   | 2098        | 0.18     | 1        | 1         | 1.424E-02 | 1.829E-02 | PB-CAG-SD  |
| BRWD1         | bromodomain and WD repeat domain containing 1 [Source:HGNC Symbol;Acc:12760]                                                     | 21    | 40556102  | 40698485   | 1502        | 0.174    | 1        | 1         | 1.356E-02 | 1.742E-02 | PB-CAG-SD  |
| CDH10         | cadherin 10, type 2 (T2-cadherin) [Source:HGNC Symbol;Acc:1749]                                                                  | 5     | 24487209  | 24650087   | 1645        | 0.175    | 1        | 1         | 1.360E-02 | 1.746E-02 | PB-CAG-SD  |
| TDFP2         | transcription factor Dp-2 (E2F dimerization partner 2) [Source:HGNC Symbol;Acc:11751]                                            | 1     | 114166327 | 1141873386 | 1466        | 0.175    | 1        | 1         | 1.362E-02 | 1.747E-02 | PB-CAG-SD  |
| EED1          | early endosome antigen 1 [Source:HGNC Symbol;Acc:3188]                                                                           | 4     | 93184413  | 93291112   | 1512        | 0.175    | 1        | 1         | 1.368E-02 | 1.753E-02 | PB-CAG-SD  |
| WDPCP         | WD repeat containing planar cell polarity effector [Source:HGNC Symbol;Acc:28027]                                                | 2     | 63348518  | 64059977   | 5431        | 0.195    | 2        | 2         | 1.399E-02 | 1.790E-02 | PB-CAG-SD  |
| KAT6B         | (llysine) acetyltransferase 6B [Source:HGNC Symbol;Acc:17582]                                                                    | 10    | 76580340  | 76792380   | 1554        | 0.177    | 1        | 1         | 1.400E-02 | 1.790E-02 | PB-CAG-SD  |
| LHFP2L2       | lipoma HMGIC fusion partner-like 2 [Source:HGNC Symbol;Acc:6588]                                                                 | 7     | 17781038  | 78070844   | 1674        | 0.178    | 1        | 1         | 1.406E-02 | 1.795E-02 | PB-CAG-SD  |
| HSRST3        | heparan sulfate 6-O-sulfatase 3 [Source:HGNC Symbol;Acc:19134]                                                                   | 5     | 98738970  | 98738970   | 1579        | 0.179    | 1        | 1         | 1.408E-02 | 1.796E-02 | PB-CAG-SD  |
| SLMAP         | sarcolemma associated protein [Source:HGNC Symbol;Acc:16643]                                                                     | 3     | 57736177  | 57914895   | 1498        | 0.179    | 1        | 1         | 1.419E-02 | 1.808E-02 | PB-CAG-SD  |
| PARN          | poly(A)-specific ribonuclease [Source:HGNC Symbol;Acc:8609]                                                                      | 16    | 14529558  | 14731585   | 1371        | 0.179    | 1        | 1         | 1.423E-02 | 1.811E-02 | PB-CAG-SD  |
| SUPT3H        | suppressor of Ty 3 homolog (S. cerevisiae) [Source:HGNC Symbol;Acc:11466]                                                        | 6     | 44777054  | 45350690   | 50          |          |          |           |           |           |            |

**table S2. Genes with significant transposon integrations in RKO BRAF<sup>WT/WT</sup> cells after selection in low glucose medium**

| Gene ID  | Description                                                                                                                     | Chrom | Start     | End       | # TTAAs sites | Expected | Observed | Libraries | P         | FDR       | Transposon |
|----------|---------------------------------------------------------------------------------------------------------------------------------|-------|-----------|-----------|---------------|----------|----------|-----------|-----------|-----------|------------|
| C14orf37 | chromosome 14 open reading frame 37 [Source:HGNC Symbol;Acc:19846]                                                              | 14    | 58466453  | 58769857  | 2149          | 0.235    | 1        | 1         | 2.370E-02 | 2.831E-02 | PB-CAG-SD  |
| RERG     | RAS-estrogen-regulated, growth inhibitor [Source:HGNC Symbol;Acc:15980]                                                         | 12    | 15201717  | 15590960  | 2045          | 0.237    | 1        | 1         | 2.307E-02 | 2.861E-02 | PB-CAG-SD  |
| TTLL5    | tubulin tyrosine ligase-like family, member 5 [Source:HGNC Symbol;Acc:19963]                                                    | 14    | 76094958  | 76421421  | 2188          | 0.240    | 1        | 1         | 2.450E-02 | 2.921E-02 | PB-CAG-SD  |
| CADPS2   | Ca <sup>++</sup> -dependent secretory activator 2 [Source:HGNC Symbol;Acc:16018]                                                | 7     | 121958481 | 122531813 | 5135          | 0.616    | 2        | 2         | 2.473E-02 | 2.945E-02 | PB-CAG-SD  |
| HELZ     | helicase with zinc finger [Source:HGNC Symbol;Acc:16878]                                                                        | 17    | 65066554  | 65247105  | 1793          | 0.241    | 1        | 1         | 2.479E-02 | 2.949E-02 | PB-CAG-SD  |
| ANO2     | anoctamin 2 [Source:HGNC Symbol;Acc:1183]                                                                                       | 12    | 5641035   | 6060398   | 2086          | 0.242    | 1        | 1         | 2.491E-02 | 2.961E-02 | PB-CAG-SD  |
| DNAJC1   | Dnaj (Hsp40) homolog, subfamily C, member 1 [Source:HGNC Symbol;Acc:20090]                                                      | 10    | 22045646  | 22297698  | 2121          | 0.242    | 1        | 1         | 2.500E-02 | 2.969E-02 | PB-CAG-SD  |
| C2orf88  | chromosome 2 open reading frame 88 [Source:HGNC Symbol;Acc:28191]                                                               | 2     | 190739335 | 191068210 | 2672          | 0.243    | 1        | 1         | 2.523E-02 | 2.993E-02 | PB-CAG-SD  |
| LDB2     | LIM domain binding 2 [Source:HGNC Symbol;Acc:6533]                                                                              | 4     | 16503164  | 16595432  | 2768          | 0.244    | 1        | 1         | 2.538E-02 | 3.007E-02 | PB-CAG-SD  |
| PCSK2    | proprotein convertase subtilisin/kexin type 2 [Source:HGNC Symbol;Acc:6744]                                                     | 10    | 127700250 | 128302024 | 2197          | 0.251    | 1        | 1         | 2.686E-02 | 3.146E-02 | PB-CAG-SD  |
| NSMCE2   | non-SMC element 2, MMS21 homolog (S. cerevisiae) [Source:HGNC Symbol;Acc:26513]                                                 | 8     | 126098921 | 126379362 | 1998          | 0.246    | 1        | 1         | 2.579E-02 | 3.050E-02 | PB-CAG-SD  |
| CUBN     | cubilin (intrinsic factor-cobalamin receptor) [Source:HGNC Symbol;Acc:2548]                                                     | 10    | 16865963  | 17176830  | 2163          | 0.247    | 1        | 1         | 2.592E-02 | 3.063E-02 | PB-CAG-SD  |
| DDAH1    | dimethylarginine dimethylaminohydrolase 1 [Source:HGNC Symbol;Acc:2715]                                                         | 1     | 85784164  | 86048933  | 2051          | 0.248    | 1        | 1         | 2.620E-02 | 3.092E-02 | PB-CAG-SD  |
| ADAM12   | ADAM metalloproteinase domain 12 [Source:HGNC Symbol;Acc:190]                                                                   | 4     | 114372168 | 114688083 | 2918          | 0.257    | 1        | 1         | 2.789E-02 | 3.272E-02 | PB-CAG-SD  |
| ADAMTS12 | ADAM metalloproteinase with thrombospondin type 1 motif, 12 [Source:HGNC Symbol;Acc:14605]                                      | 5     | 35523640  | 33897297  | 2368          | 0.252    | 1        | 1         | 2.680E-02 | 3.158E-02 | PB-CAG-SD  |
| RGL1     | ral guanine nucleotide dissociation stimulator-like 1 [Source:HGNC Symbol;Acc:30281]                                            | 1     | 183600208 | 183897666 | 2087          | 0.253    | 1        | 1         | 2.705E-02 | 3.183E-02 | PB-CAG-SD  |
| ZNF280D  | zinc finger protein 280D [Source:HGNC Symbol;Acc:25953]                                                                         | 15    | 56922379  | 57215769  | 2450          | 0.253    | 1        | 1         | 2.712E-02 | 3.189E-02 | PB-CAG-SD  |
| TIAM2    | T-cell lymphoma invasion and metastasis 2 [Source:HGNC Symbol;Acc:11806]                                                        | 6     | 155148831 | 155578857 | 2556          | 0.254    | 1        | 1         | 2.726E-02 | 3.202E-02 | PB-CAG-SD  |
| AK5      | adenylyl kinase 5 [Source:HGNC Symbol;Acc:365]                                                                                  | 7     | 17742736  | 18025851  | 2115          | 0.256    | 1        | 1         | 2.772E-02 | 3.252E-02 | PB-CAG-SD  |
| CFTR     | cystic fibrosis transmembrane conductance regulator (ATP-binding cassette sub-family C, member 7) [Source:HGNC Symbol;Acc:1462] | 7     | 117100838 | 117560255 | 2140          | 0.257    | 1        | 1         | 2.782E-02 | 3.262E-02 | PB-CAG-SD  |
| MYO3A    | myosin IIIA [Source:HGNC Symbol;Acc:7601]                                                                                       | 10    | 26218196  | 26501456  | 2253          | 0.257    | 1        | 1         | 2.794E-02 | 3.272E-02 | PB-CAG-SD  |
| CAIHK2D  | calcium/calmodulin-dependent protein kinase II delta [Source:HGNC Symbol;Acc:1462]                                              | 4     | 114372168 | 114688083 | 2918          | 0.257    | 1        | 1         | 2.789E-02 | 3.272E-02 | PB-CAG-SD  |
| ERG      | v-erb avian erythroblastosis virus E26 oncogene homolog [Source:HGNC Symbol;Acc:3446]                                           | 21    | 39751949  | 40387044  | 1777          | 0.258    | 1        | 1         | 2.806E-02 | 3.280E-02 | PB-CAG-SD  |
| EY4A     | eyes absent homolog 4 (Drosophila) [Source:HGNC Symbol;Acc:3522]                                                                | 6     | 133556736 | 133853258 | 2604          | 0.259    | 1        | 1         | 2.820E-02 | 3.294E-02 | PB-CAG-SD  |
| ANK3     | ankyrin 3, node of Ranvier (ankyrin G) [Source:HGNC Symbol;Acc:494]                                                             | 10    | 61788159  | 62498248  | 5690          | 0.650    | 2        | 2         | 2.832E-02 | 3.304E-02 | PB-CAG-SD  |
| ANCO10   | anctanin 10 [Source:HGNC Symbol;Acc:25519]                                                                                      | 3     | 43346551  | 43739086  | 2176          | 0.261    | 1        | 1         | 2.840E-02 | 3.310E-02 | PB-CAG-SD  |
| FAM189A1 | family with sequence similarity 189, member A1 [Source:HGNC Symbol;Acc:29075]                                                   | 15    | 29112457  | 29867927  | 2519          | 0.260    | 1        | 1         | 2.854E-02 | 3.323E-02 | PB-CAG-SD  |
| TNR      | tenascin R [Source:HGNC Symbol;Acc:11953]                                                                                       | 1     | 175291935 | 175717906 | 2166          | 0.262    | 1        | 1         | 2.895E-02 | 3.368E-02 | PB-CAG-SD  |
| ZFAND3   | zinc finger, AN1-type domain 3 [Source:HGNC Symbol;Acc:18019]                                                                   | 6     | 37782275  | 38122400  | 2647          | 0.263    | 1        | 1         | 2.906E-02 | 3.377E-02 | PB-CAG-SD  |
| BAZ2B    | bromodomain adjacent to zinc finger domain, 2B [Source:HGNC Symbol;Acc:963]                                                     | 2     | 160175490 | 160476203 | 2903          | 0.264    | 1        | 1         | 2.938E-02 | 3.407E-02 | PB-CAG-SD  |
| FILIP1L  | filamin A interacting protein 1-like [Source:HGNC Symbol;Acc:24698]                                                             | 17    | 95648895  | 95938357  | 2217          | 0.260    | 1        | 1         | 2.937E-02 | 3.407E-02 | PB-CAG-SD  |
| LRRCC16A | leucine rich repeat containing 16A [Source:HGNC Symbol;Acc:21581]                                                               | 6     | 25274306  | 25620758  | 2864          | 0.265    | 1        | 1         | 2.940E-02 | 3.407E-02 | PB-CAG-SD  |
| PID1     | phosphotyrosine interaction domain containing 1 [Source:HGNC Symbol;Acc:26084]                                                  | 2     | 229715242 | 230141001 | 2966          | 0.270    | 1        | 1         | 3.055E-02 | 3.537E-02 | PB-CAG-SD  |
| ANGPT1   | angiopoietin 1 [Source:HGNC Symbol;Acc:484]                                                                                     | 8     | 108261721 | 108515283 | 2195          | 0.271    | 1        | 1         | 3.064E-02 | 3.541E-02 | PB-CAG-SD  |
| RALGAPA1 | Ral GTPase activating protein, alpha subunit 1 (catalytic) [Source:HGNC Symbol;Acc:17770]                                       | 14    | 36017558  | 36293510  | 2472          | 0.271    | 1        | 1         | 3.085E-02 | 3.541E-02 | PB-CAG-SD  |
| MARCH1   | membrane-associated ring finger (C3HC4) 1, E3 ubiquitin protein ligase [Source:HGNC Symbol;Acc:28077]                           | 4     | 164454550 | 165310202 | 7616          | 0.672    | 2        | 2         | 3.081E-02 | 3.557E-02 | PB-CAG-SD  |
| ADARB2   | adenosine deaminase, RNA-specific, B2 (non-functional) [Source:HGNC Symbol;Acc:227]                                             | 10    | 1228073   | 1278470   | 2432          | 0.278    | 1        | 1         | 3.121E-02 | 3.704E-02 | PB-CAG-SD  |
| SLC44A4  | solute carrier family 4, sodium bicarbonate cotransporter, member 4 [Source:HGNC Symbol;Acc:11030]                              | 4     | 72048003  | 72437804  | 3156          | 0.278    | 1        | 1         | 3.226E-02 | 3.717E-02 | PB-CAG-SD  |
| STXB4    | staxin binding protein 4 [Source:HGNC Symbol;Acc:16894]                                                                         | 17    | 53041088  | 53241846  | 1626          | 0.280    | 1        | 1         | 3.237E-02 | 3.749E-02 | PB-CAG-SD  |
| HIVEP3   | human immunodeficiency virus type 1 enhancer binding protein 3 [Source:HGNC Symbol;Acc:13561]                                   | 1     | 41972036  | 42506596  | 2313          | 0.280    | 1        | 1         | 3.263E-02 | 3.753E-02 | PB-CAG-SD  |
| VWA8     | von Willebrand factor A domain containing 8 [Source:HGNC Symbol;Acc:29071]                                                      | 13    | 42140973  | 42540256  | 3250          | 0.281    | 1        | 1         | 3.271E-02 | 3.758E-02 | PB-CAG-SD  |
| EVIS     | ectopic viral integration site 5 [Source:HGNC Symbol;Acc:3591]                                                                  | 1     | 92974253  | 93262961  | 2318          | 0.281    | 1        | 1         | 3.276E-02 | 3.760E-02 | PB-CAG-SD  |
| MARCF1   | microtubule-actin crosslinking factor 1 [Source:HGNC Symbol;Acc:13684]                                                          | 1     | 39541988  | 39952949  | 2351          | 0.285    | 1        | 1         | 3.381E-02 | 3.854E-02 | PB-CAG-SD  |
| SYN3     | synapsin III [Source:HGNC Symbol;Acc:11496]                                                                                     | 22    | 32908539  | 33459358  | 2391          | 0.286    | 1        | 1         | 3.388E-02 | 3.881E-02 | PB-CAG-SD  |
| SLC35F3  | solute carrier family 35, member F3 [Source:HGNC Symbol;Acc:23616]                                                              | 1     | 234035679 | 234402622 | 2365          | 0.286    | 1        | 1         | 3.398E-02 | 3.889E-02 | PB-CAG-SD  |
| CRB1     | crumbs homolog 1 (Drosophila) [Source:HGNC Symbol;Acc:2343]                                                                     | 1     | 197165592 | 197447585 | 2369          | 0.287    | 1        | 1         | 3.408E-02 | 3.897E-02 | PB-CAG-SD  |
| FRMPD4   | FERM and PDZ domain containing 4 [Source:HGNC Symbol;Acc:29007]                                                                 | X     | 12151585  | 12742842  | 4186          | 0.287    | 1        | 1         | 3.413E-02 | 3.898E-02 | PB-CAG-SD  |
| DLG1     | discs, large homolog 1 (Drosophila) [Source:HGNC Symbol;Acc:2900]                                                               | 1     | 396769431 | 397031171 | 2408          | 0.287    | 1        | 1         | 3.416E-02 | 3.898E-02 | PB-CAG-SD  |
| SLC39A11 | solute carrier family 39, member 11 [Source:HGNC Symbol;Acc:14463]                                                              | 17    | 70642088  | 71093851  | 1876          | 0.288    | 1        | 1         | 3.420E-02 | 3.900E-02 | PB-CAG-SD  |
| C10orf68 | chromosome 10 open reading frame 68 [Source:HGNC Symbol;Acc:25778]                                                              | 10    | 52827297  | 53171802  | 2531          | 0.289    | 1        | 1         | 3.433E-02 | 3.914E-02 | PB-CAG-SD  |
| SGCD     | sarcoglycan, delta (SRD6 dystrophin-associated glycoprotein) [Source:HGNC Symbol;Acc:10807]                                     | 5     | 155292354 | 158194789 | 6673          | 0.709    | 2        | 2         | 3.524E-02 | 4.010E-02 | PB-CAG-SD  |
| AP3B1    | adaptor-related protein complex 3, beta 1 subunit [Source:HGNC Symbol;Acc:566]                                                  | 5     | 77296349  | 77595579  | 2771          | 0.294    | 1        | 1         | 3.570E-02 | 4.058E-02 | PB-CAG-SD  |
| C3orf67  | chromosome 3 open reading frame 67 [Source:HGNC Symbol;Acc:24763]                                                               | 3     | 58703092  | 59040810  | 2473          | 0.295    | 1        | 1         | 3.584E-02 | 4.071E-02 | PB-CAG-SD  |
| PPM1L    | protein phosphatase, Mg <sup>2+</sup> /Mn <sup>2+</sup> dependent, 1L [Source:HGNC Symbol;Acc:16381]                            | 3     | 160468390 | 160796995 | 2502          | 0.299    | 1        | 1         | 3.661E-02 | 4.154E-02 | PB-CAG-SD  |
| FRAS1    | Fraser syndrome 1 [Source:HGNC Symbol;Acc:19185]                                                                                | 4     | 78973724  | 79468423  | 3366          | 0.299    | 1        | 1         | 3.666E-02 | 4.155E-02 | PB-CAG-SD  |
| ARHGAP26 | Rho GTPase activating protein 26 [Source:HGNC Symbol;Acc:17073]                                                                 | 5     | 142144949 | 142608576 | 2840          | 0.302    | 1        | 1         | 3.732E-02 | 4.227E-02 | PB-CAG-SD  |
| KIF18B   | kinesin family member 18B [Source:HGNC Symbol;Acc:15869]                                                                        | 20    | 16252749  | 16559078  | 2101          | 0.302    | 1        | 1         | 3.736E-02 | 4.227E-02 | PB-CAG-SD  |
| ASAP1    | ArtGAP with SH domain, ankyrin repeat and PH domain 1 [Source:HGNC Symbol;Acc:2720]                                             | 8     | 131064353 | 131460306 | 2475          | 0.305    | 1        | 1         | 3.809E-02 | 4.306E-02 | PB-CAG-SD  |
| ZNF804A  | zinc finger protein 804A [Source:HGNC Symbol;Acc:21711]                                                                         | 2     | 185458093 | 185804219 | 3387          | 0.309    | 1        | 1         | 3.886E-02 | 4.398E-02 | PB-CAG-SD  |
| PAK7     | p21 protein (Cdc42/Rac)-activated kinase 7 [Source:HGNC Symbol;Acc:15916]                                                       | 20    | 9518036   | 9824689   | 2151          | 0.309    | 1        | 1         | 3.897E-02 | 4.398E-02 | PB-CAG-SD  |
| TPRG1    | tumor protein p63 regulated 1 [Source:HGNC Symbol;Acc:24759]                                                                    | 3     | 188660003 | 189043093 | 2600          | 0.310    | 1        | 1         | 3.923E-02 | 4.423E-02 | PB-CAG-SD  |
| NUPL     | nucleotide binding protein-like [Source:HGNC Symbol;Acc:20278]                                                                  | 14    | 31954162  | 32330430  | 2862          | 0.313    | 1        | 1         | 3.995E-02 | 4.500E-02 | PB-CAG-SD  |
| DYNC11   | dynein, cytoplasmic 1, intermediate chain 1 [Source:HGNC Symbol;Acc:2963]                                                       | 7     | 95368666  | 95739634  | 2640          | 0.317    | 1        | 1         | 4.072E-02 | 4.582E-02 | PB-CAG-SD  |
| PIEZO2   | piezo-type mechanosensitive ion channel component 2 [Source:HGNC Symbol;Acc:26270]                                              | 18    | 10666480  | 11153587  | 3233          | 0.321    | 1        | 1         | 4.163E-02 | 4.680E-02 | PB-CAG-SD  |
| NCOA2    | nuclear receptor coactivator 2 [Source:HGNC Symbol;Acc:7669]                                                                    | 8     | 71021997  | 71321040  | 2615          | 0.322    | 1        | 1         | 4.205E-02 | 4.722E-02 | PB-CAG-SD  |
| EXO4     | exocyst complex component 4 [Source:HGNC Symbol;Acc:30389]                                                                      | 7     | 112932829 | 113751342 | 6350          | 0.762    | 2        | 2         | 4.209E-02 | 4.723E-02 | PB-CAG-SD  |
| MCC      | mutated in colorectal cancers [Source:HGNC Symbol;Acc:6935]                                                                     | 5     | 112357796 | 112829527 | 3059          | 0.325    | 1        | 1         | 4.265E-02 | 4.781E-02 | PB-CAG-SD  |
| SNX29    | sorting nexin 29 [Source:HGNC Symbol;Acc:30542]                                                                                 | 16    | 12605594  | 12668146  | 2494          | 0.326    | 1        | 1         | 4.279E-02 | 4.792E-02 | PB-CAG-SD  |
| FNIP1    | folliculin interacting protein 1 [Source:HGNC Symbol;Acc:29418]                                                                 | 5     | 130761584 | 131177110 | 3074          | 0.327    | 1        | 1         | 4.302E-02 | 4.814E-02 | PB-CAG-SD  |
| NFAS3    | neuronal PAS domain protein 3 [Source:HGNC Symbol;Acc:19311]                                                                    | 14    | 33399139  | 34273382  | 7051          | 0.772    | 2        | 2         | 4.349E-02 | 4.862E-02 | PB-CAG-SD  |
| CD96     | CD96 molecule [Source:HGNC Symbol;Acc:16892]                                                                                    | 3     | 111065666 | 111364597 | 2757          | 0.329    | 1        | 1         | 4.358E-02 | 4.867E-02 | PB-CAG-SD  |
| KIF26B   | kinesin family member 26B [Source:HGNC Symbol;Acc:25484]                                                                        | 1     | 245313287 | 245872733 | 2720          | 0.329    | 1        | 1         | 4.371E-02 | 4.877E-02 | PB-CAG-SD  |
| STAU2    | stauflin double-stranded RNA binding protein 2 [Source:HGNC Symbol;Acc:11371]                                                   | 8     | 74332604  | 74664943  | 2676          | 0.330    | 1        | 1         | 4.382E-02 | 4.885E-02 | PB-CAG-SD  |
| DNAH11   | dynein, axonemal, heavy chain 11 [Source:HGNC Symbol;Acc:2942]                                                                  | 7     | 21577833  | 21941457  | 2759          | 0.331    | 1        | 1         | 4.407E-02 | 4.908E-02 | PB-CAG-SD  |
| CMSS1    | cms1 ribosomal small subunit homolog (yeast) [Source:HGNC Symbol;Acc:29666]                                                     | 3     | 99531678  | 99997447  | 2785          | 0.332    | 1        | 1         | 4.437E-02 | 4.938E-02 | PB-CAG-SD  |

**table S2. Genes with significant transposon integrations in RKO BRAF<sup>WT/WT</sup> cells after selection in low glucose medium.** Two libraries were generated by mutagenesis with gene trap (PB-GT) and two by promoter containing (PB-CAG-SD) transposon constructs followed by serial selection in low glucose and hygromycin. Gene IDs, descriptions and chromosomal locations were obtained from Ensembl. The number of TTAAs sites corresponds to intronic TTAAs sites in case of PB-GT and also includes TTAAs sites within 5 kb of the gene for PB-CAG-SD transposon libraries. Expected, the number of expected random integrations; Observed, the number of independent integration sites observed by sequencing of splinkerette PCR products from the libraries; Libraries, number of libraries (out of 2) containing integrations in the gene; P, P value calculated using Poisson statistics, FDR, False Discovery Rate correction for multiple testing. An

**table S3. Genes with significant transposon integrations in both RKO *BRAF<sup>wt/-</sup>* and *DLD-1 KRAS<sup>wt/-</sup>* libraries**

| Gene ID         | description                                                                                          | Chrom | Start     | End       |
|-----------------|------------------------------------------------------------------------------------------------------|-------|-----------|-----------|
| MARCH6          | membrane-associated ring finger (C3HC4) 6, E3 ubiquitin protein ligase [Source:HGNC Symbol;Acc:3055] | chr5  | 10353815  | 10435491  |
| 42256           | septin 9 [Source:HGNC Symbol;Acc:7323]                                                               | chr17 | 75276651  | 75496678  |
| AAGAB           | alpha- and gamma-adaptin binding protein [Source:HGNC Symbol;Acc:25662]                              | chr15 | 67493371  | 67552533  |
| ABHD2           | abhydrolase domain containing 2 [Source:HGNC Symbol;Acc:18717]                                       | chr15 | 89630690  | 89745591  |
| ABI1            | abl-interactor 1 [Source:HGNC Symbol;Acc:11320]                                                      | chr10 | 27035522  | 27155016  |
| ACAP2           | ArfGAP with coiled-coil, ankyrin repeat and PH domains 2 [Source:HGNC Symbol;Acc:16469]              | chr3  | 194995465 | 195168807 |
| ACER3           | alkaline ceramidase 3 [Source:HGNC Symbol;Acc:16066]                                                 | chr11 | 76571911  | 76737841  |
| ACIN1           | apoptotic chromatin condensation inducer 1 [Source:HGNC Symbol;Acc:17066]                            | chr14 | 23527773  | 23569823  |
| ACTN4           | actinin, alpha 4 [Source:HGNC Symbol;Acc:166]                                                        | chr19 | 39138289  | 39222223  |
| ACTR8           | ARP8 actin-related protein 8 homolog (yeast) [Source:HGNC Symbol;Acc:14672]                          | chr3  | 53901093  | 53916229  |
| ACVR1           | activin A receptor, type I [Source:HGNC Symbol;Acc:171]                                              | chr2  | 158592958 | 158732374 |
| ADAM10          | ADAM metalloproteinase domain 10 [Source:HGNC Symbol;Acc:188]                                        | chr15 | 58887403  | 59042177  |
| ADAM17          | ADAM metalloproteinase domain 17 [Source:HGNC Symbol;Acc:195]                                        | chr2  | 9628615   | 9695921   |
| ADAM32          | ADAM metalloproteinase domain 32 [Source:HGNC Symbol;Acc:15479]                                      | chr8  | 38959509  | 39142430  |
| ADAMT56         | ADAM metalloproteinase with thrombospondin type 1 motif, 6 [Source:HGNC Symbol;Acc:222]              | chr5  | 64444563  | 64782747  |
| ADARB2          | adenosine deaminase, RNA-specific, B2 (non-functional) [Source:HGNC Symbol;Acc:227]                  | chr10 | 1228073   | 1284670   |
| ADCY7           | adenylate cyclase 7 [Source:HGNC Symbol;Acc:238]                                                     | chr16 | 50275048  | 50352046  |
| ADCY9           | adenylate cyclase 9 [Source:HGNC Symbol;Acc:240]                                                     | chr16 | 4003388   | 4166186   |
| ADNP            | activity-dependent neuroprotector homeobox [Source:HGNC Symbol;Acc:15766]                            | chr20 | 49505453  | 49547958  |
| ADORA2A-AS1     | ADORA2A antisense RNA 1 [Source:HGNC Symbol;Acc:37122]                                               | chr22 | 24825178  | 24891042  |
| AGA             | aspartylglucosaminidase [Source:HGNC Symbol;Acc:318]                                                 | chr4  | 178351924 | 178363657 |
| AHNAK           | AHNAK nucleoprotein [Source:HGNC Symbol;Acc:347]                                                     | chr11 | 62201016  | 62323707  |
| AK7             | adenylate kinase 7 [Source:HGNC Symbol;Acc:20091]                                                    | chr14 | 96858448  | 96955764  |
| AKAP12          | A kinase (PRKA) anchor protein 12 [Source:HGNC Symbol;Acc:370]                                       | chr6  | 151556134 | 151679692 |
| AKR1C3          | aldo-keto reductase family 1, member C3 [Source:HGNC Symbol;Acc:386]                                 | chr10 | 5077546   | 5149878   |
| ALDH1L2         | aldehyde dehydrogenase 1 family, member L2 [Source:HGNC Symbol;Acc:26777]                            | chr12 | 105413568 | 105478355 |
| ALDH2           | aldehyde dehydrogenase 2 family (mitochondrial) [Source:HGNC Symbol;Acc:404]                         | chr12 | 112204691 | 112247782 |
| ALG10           | ALG10, alpha-1,2-glucosyltransferase [Source:HGNC Symbol;Acc:23162]                                  | chr12 | 34175216  | 34182629  |
| ANGPT1          | angiopoietin 1 [Source:HGNC Symbol;Acc:484]                                                          | chr8  | 108261721 | 108515283 |
| ANK1            | ankyrin 1, erythrocytic [Source:HGNC Symbol;Acc:492]                                                 | chr8  | 41510739  | 41759280  |
| ANKRD30BL       | ankyrin repeat domain 30B-like [Source:HGNC Symbol;Acc:35167]                                        | chr2  | 132905164 | 133015542 |
| ANKRD50         | ankyrin repeat domain 50 [Source:HGNC Symbol;Acc:29223]                                              | chr4  | 125585207 | 125633887 |
| ANXA2           | annexin A2 [Source:HGNC Symbol;Acc:537]                                                              | chr15 | 60639333  | 60695082  |
| ANXA4           | annexin A4 [Source:HGNC Symbol;Acc:542]                                                              | chr2  | 69947923  | 70053596  |
| AP1B1           | adaptor-related protein complex 1, beta 1 subunit [Source:HGNC Symbol;Acc:554]                       | chr22 | 29723669  | 29819168  |
| AP1S3           | adaptor-related protein complex 1, sigma 3 subunit [Source:HGNC Symbol;Acc:18971]                    | chr2  | 224616403 | 224702744 |
| AP3M1           | adaptor-related protein complex 3, mu 1 subunit [Source:HGNC Symbol;Acc:569]                         | chr10 | 75881524  | 75910821  |
| APLP2           | amyloid beta (A4) precursor-like protein 2 [Source:HGNC Symbol;Acc:598]                              | chr11 | 129939732 | 130014699 |
| APP             | amyloid beta (A4) precursor protein [Source:HGNC Symbol;Acc:620]                                     | chr21 | 27252861  | 27543446  |
| ARHGAP12        | Rho GTPase activating protein 12 [Source:HGNC Symbol;Acc:16348]                                      | chr10 | 32094365  | 32222742  |
| ARHGAP21        | Rho GTPase activating protein 21 [Source:HGNC Symbol;Acc:23725]                                      | chr10 | 24872538  | 25017597  |
| ARHGEF37        | Rho guanine nucleotide exchange factor (GEF) 37 [Source:HGNC Symbol;Acc:34430]                       | chr5  | 148926510 | 149014531 |
| ARNT            | aryl hydrocarbon receptor nuclear translocator [Source:HGNC Symbol;Acc:700]                          | chr1  | 150782181 | 150849244 |
| ARNTL           | aryl hydrocarbon receptor nuclear translocator-like [Source:HGNC Symbol;Acc:701]                     | chr11 | 13298199  | 13408813  |
| ARPC2           | actin related protein 2/3 complex, subunit 2, 34kDa [Source:HGNC Symbol;Acc:705]                     | chr2  | 219081817 | 219119079 |
| ARRDC3          | arrestin domain containing 3 [Source:HGNC Symbol;Acc:29263]                                          | chr5  | 90664541  | 90679176  |
| ASAP3           | ArfGAP with SH3 domain, ankyrin repeat and PH domain 3 [Source:HGNC Symbol;Acc:14987]                | chr1  | 23755056  | 23815685  |
| ASCC1           | activating signal cointegrator 1 complex subunit 1 [Source:HGNC Symbol;Acc:24268]                    | chr10 | 73856278  | 73976892  |
| ATG3            | autophagy related 3 [Source:HGNC Symbol;Acc:20962]                                                   | chr3  | 112251356 | 112280893 |
| ATL3            | atlastin GTPase 3 [Source:HGNC Symbol;Acc:24526]                                                     | chr11 | 63391559  | 63439393  |
| ATP6V1G2-DDX39B | ATP6V1G2-DDX39B readthrough (non-protein coding) [Source:HGNC Symbol;Acc:41999]                      | chr6  | 31497996  | 31514385  |
| ATP8B5P         | ATPase, class I, type 8B, member 5, pseudogene [Source:HGNC Symbol;Acc:27245]                        | chr9  | 35406752  | 35483026  |
| BCL2L1          | BCL2-like 1 [Source:HGNC Symbol;Acc:992]                                                             | chr20 | 30252255  | 30311792  |
| BCL2L13         | BCL2-like 13 (apoptosis facilitator) [Source:HGNC Symbol;Acc:17164]                                  | chr22 | 18111621  | 18213388  |
| BCORP1          | BCL6 corepressor pseudogene 1 [Source:HGNC Symbol;Acc:23953]                                         | chrY  | 21617317  | 21665039  |
| BDNF            | brain-derived neurotrophic factor [Source:HGNC Symbol;Acc:1033]                                      | chr11 | 27676440  | 27743605  |
| BEND7           | BEN domain containing 7 [Source:HGNC Symbol;Acc:23514]                                               | chr10 | 13480484  | 13575974  |
| BFSF1           | beaded filament structural protein 1, filensin [Source:HGNC Symbol;Acc:1040]                         | chr20 | 17474550  | 17549865  |
| BICD2           | bicaudal D homolog 2 (Drosophila) [Source:HGNC Symbol;Acc:17208]                                     | chr9  | 95473645  | 95527094  |
| BTBD10          | BTB (POZ) domain containing 10 [Source:HGNC Symbol;Acc:21445]                                        | chr11 | 13409548  | 13484844  |
| BZW2            | basic leucine zipper and W2 domains 2 [Source:HGNC Symbol;Acc:18808]                                 | chr7  | 16685756  | 16746148  |
| C10orf129       | chromosome 10 open reading frame 129 [Source:HGNC Symbol;Acc:31665]                                  | chr10 | 96953957  | 96988685  |
| C11orf80        | chromosome 11 open reading frame 80 [Source:HGNC Symbol;Acc:26197]                                   | chr11 | 66511982  | 66610987  |
| C12orf45        | chromosome 12 open reading frame 45 [Source:HGNC Symbol;Acc:28628]                                   | chr12 | 105380088 | 105443515 |
| C14orf182       | chromosome 14 open reading frame 182 [Source:HGNC Symbol;Acc:27503]                                  | chr14 | 50448430  | 50474238  |
| C1orf198        | chromosome 1 open reading frame 198 [Source:HGNC Symbol;Acc:25900]                                   | chr1  | 230972865 | 231005335 |
| C20orf96        | chromosome 20 open reading frame 96 [Source:HGNC Symbol;Acc:16227]                                   | chr20 | 251504    | 276390    |
| C2CD3           | C2 calcium-dependent domain containing 3 [Source:HGNC Symbol;Acc:24564]                              | chr11 | 73723763  | 73887255  |
| C3orf67         | chromosome 3 open reading frame 67 [Source:HGNC Symbol;Acc:24763]                                    | chr3  | 58703092  | 59040810  |
| C4orf45         | chromosome 4 open reading frame 45 [Source:HGNC Symbol;Acc:26342]                                    | chr4  | 159814286 | 159959912 |
| C5orf42         | chromosome 5 open reading frame 42 [Source:HGNC Symbol;Acc:25801]                                    | chr5  | 37106330  | 37254530  |
| C6orf183        | chromosome 6 open reading frame 183 [Source:HGNC Symbol;Acc:21562]                                   | chr6  | 109487036 | 109592217 |
| C7orf49         | chromosome 7 open reading frame 49 [Source:HGNC Symbol;Acc:22432]                                    | chr7  | 134777115 | 134855547 |
| C7orf55-LUC7L2  | C7orf55-LUC7L2 readthrough [Source:HGNC Symbol;Acc:44671]                                            | chr7  | 139025105 | 139108198 |
| C7orf63         | chromosome 7 open reading frame 63 [Source:HGNC Symbol;Acc:26107]                                    | chr7  | 89874488  | 89940377  |
| C9orf3          | chromosome 9 open reading frame 3 [Source:HGNC Symbol;Acc:1361]                                      | chr9  | 97488983  | 97849441  |
| CACNB4          | calcium channel, voltage-dependent, beta 4 subunit [Source:HGNC Symbol;Acc:1404]                     | chr2  | 152689290 | 152960593 |
| CAMK2D          | calcium/calmodulin-dependent protein kinase II delta [Source:HGNC Symbol;Acc:1462]                   | chr4  | 114372188 | 114683083 |
| CAV1            | caveolin 1, caveolae protein, 22kDa [Source:HGNC Symbol;Acc:1527]                                    | chr7  | 116159839 | 116201233 |
| CCAT1           | colon cancer associated transcript 1 (non-protein coding) [Source:HGNC Symbol;Acc:45128]             | chr8  | 128220111 | 128231333 |
| CCND3           | cyclin D3 [Source:HGNC Symbol;Acc:1585]                                                              | chr6  | 41902671  | 42018095  |
| CD8B            | CD8b molecule [Source:HGNC Symbol;Acc:1707]                                                          | chr2  | 87042462  | 87094047  |
| CD96            | CD96 molecule [Source:HGNC Symbol;Acc:16892]                                                         | chr3  | 111006566 | 111384597 |
| CDC42EP3        | CDC42 effector protein (Rho GTPase binding) 3 [Source:HGNC Symbol;Acc:16943]                         | chr2  | 37869032  | 37965611  |
| CDKN2C          | cyclin-dependent kinase inhibitor 2C (p18, inhibits CDK4) [Source:HGNC Symbol;Acc:1789]              | chr1  | 51426417  | 51440305  |
| CDX2            | caudal type homeobox 2 [Source:HGNC Symbol;Acc:1806]                                                 | chr13 | 28536274  | 28545276  |
| CELF4           | CUGBP, Elav-like family member 4 [Source:HGNC Symbol;Acc:14015]                                      | chr18 | 34823010  | 35146000  |
| CEP55           | centrosomal protein 55kDa [Source:HGNC Symbol;Acc:1161]                                              | chr10 | 95256389  | 95288849  |
| CHM             | choroideremia (Rab escort protein 1) [Source:HGNC Symbol;Acc:1940]                                   | chrX  | 85116185  | 85307566  |
| CIRH1A          | cirrhosis, autosomal recessive 1A (cirhin) [Source:HGNC Symbol;Acc:1983]                             | chr16 | 69165194  | 69202941  |



**table S3. Genes with significant transposon integrations in both RKO *BRAF<sup>wt/-</sup>* and *DLD-1 KRAS<sup>wt/-</sup>* libraries**

| Gene ID    | description                                                                                                                | Chrom | Start     | End       |
|------------|----------------------------------------------------------------------------------------------------------------------------|-------|-----------|-----------|
| CKS2       | CDC28 protein kinase regulatory subunit 2 [Source:HGNC Symbol;Acc:2000]                                                    | chr9  | 91926113  | 91931618  |
| CLIP2      | CAP-GLY domain containing linker protein 2 [Source:HGNC Symbol;Acc:2586]                                                   | chr7  | 73698805  | 73820273  |
| COMT8      | CKLF-like MARVEL transmembrane domain containing 8 [Source:HGNC Symbol;Acc:19179]                                          | chr3  | 32280171  | 32411817  |
| COA1       | cytochrome c oxidase assembly factor 1 homolog (S. cerevisiae) [Source:HGNC Symbol;Acc:21868]                              | chr7  | 43648055  | 43769316  |
| COL22A1    | collagen, type XXII, alpha 1 [Source:HGNC Symbol;Acc:22989]                                                                | chr8  | 139600478 | 139931249 |
| COL4A2     | collagen, type IV, alpha 2 [Source:HGNC Symbol;Acc:2203]                                                                   | chr13 | 110953159 | 111165374 |
| COMM7      | COMM domain containing 7 [Source:HGNC Symbol;Acc:16223]                                                                    | chr20 | 31290493  | 31331814  |
| COP5       | COP9 signalosome subunit 5 [Source:HGNC Symbol;Acc:2240]                                                                   | chr8  | 67955314  | 67996018  |
| CPNE3      | copine III [Source:HGNC Symbol;Acc:2316]                                                                                   | chr8  | 87497059  | 87573726  |
| CPOX       | coproporphyrinogen oxidase [Source:HGNC Symbol;Acc:2321]                                                                   | chr3  | 98239976  | 98312567  |
| CR1L       | complement component (3b/4b) receptor 1-like [Source:HGNC Symbol;Acc:2335]                                                 | chr1  | 207818458 | 207911761 |
| CROCC      | ciliary rootlet coiled-coil, rootletin [Source:HGNC Symbol;Acc:21299]                                                      | chr1  | 17066768  | 17299474  |
| CSNK1E     | casein kinase 1, epsilon [Source:HGNC Symbol;Acc:2453]                                                                     | chr22 | 38686697  | 38794527  |
| CUX1       | cut-like homeobox 1 [Source:HGNC Symbol;Acc:2557]                                                                          | chr7  | 101453959 | 101927249 |
| CXXC5      | CXXC finger protein 5 [Source:HGNC Symbol;Acc:26943]                                                                       | chr5  | 139021884 | 139063467 |
| CYB5B      | cytochrome b5 type B (outer mitochondrial membrane) [Source:HGNC Symbol;Acc:24374]                                         | chr16 | 69458428  | 69500169  |
| CYTH3      | cytohesin 3 [Source:HGNC Symbol;Acc:9504]                                                                                  | chr7  | 6201407   | 6312275   |
| DCAF12     | DDB1 and CUL4 associated factor 12 [Source:HGNC Symbol;Acc:19911]                                                          | chr9  | 34086385  | 34127397  |
| DCP2       | DCP2 decapping enzyme homolog (S. cerevisiae) [Source:HGNC Symbol;Acc:24452]                                               | chr5  | 112312399 | 112356667 |
| DDX39B     | DEAD (Asp-Glu-Ala-Asp) box polypeptide 39B [Source:HGNC Symbol;Acc:13917]                                                  | chr6  | 31497996  | 31510225  |
| DHRS7B     | dehydrogenase/reductase (SDR family) member 7B [Source:HGNC Symbol;Acc:24547]                                              | chr17 | 21021677  | 21096578  |
| DHX16      | DEAH (Asp-Glu-Ala-His) box polypeptide 16 [Source:HGNC Symbol;Acc:2739]                                                    | chr6  | 30620896  | 30640814  |
| DIRC2      | disrupted in renal carcinoma 2 [Source:HGNC Symbol;Acc:16628]                                                              | chr3  | 122508642 | 122599986 |
| DIS3L2     | DIS3 mitotic control homolog (S. cerevisiae)-like 2 [Source:HGNC Symbol;Acc:28648]                                         | chr22 | 232825955 | 232900960 |
| DLG1       | discs, large homolog 1 (Drosophila) [Source:HGNC Symbol;Acc:2900]                                                          | chr3  | 196769431 | 197031171 |
| DLGAP1     | discs, large (Drosophila) homolog-associated protein 1 [Source:HGNC Symbol;Acc:2905]                                       | chr18 | 3496030   | 4455335   |
| DLGAP1-AS2 | DLGAP1 antisense RNA 2 [Source:HGNC Symbol;Acc:28146]                                                                      | chr18 | 3602998   | 3608334   |
| DNAH7      | dynein, axonemal, heavy chain 7 [Source:HGNC Symbol;Acc:18661]                                                             | chr2  | 196602427 | 196938536 |
| DNAJB4     | DnaJ (Hsp40) homolog, subfamily B, member 4 [Source:HGNC Symbol;Acc:14886]                                                 | chr1  | 78444859  | 78483648  |
| DNAJB6     | DnaJ (Hsp40) homolog, subfamily B, member 6 [Source:HGNC Symbol;Acc:14888]                                                 | chr7  | 157128075 | 157210133 |
| DNAJC2     | DnaJ (Hsp40) homolog, subfamily C, member 2 [Source:HGNC Symbol;Acc:13192]                                                 | chr7  | 102952921 | 102985320 |
| DNAJC9     | DnaJ (Hsp40) homolog, subfamily C, member 9 [Source:HGNC Symbol;Acc:19123]                                                 | chr10 | 74943120  | 75008620  |
| DOCK11     | dedicator of cytokinesis 11 [Source:HGNC Symbol;Acc:23483]                                                                 | chrX  | 117629861 | 117820126 |
| DSCR3      | Down syndrome critical region gene 3 [Source:HGNC Symbol;Acc:3044]                                                         | chr21 | 38595721  | 38640262  |
| DYNC11     | dynein, cytoplasmic 1, intermediate chain 1 [Source:HGNC Symbol;Acc:2963]                                                  | chr7  | 95401866  | 95739634  |
| EEF1A1     | eukaryotic translation elongation factor 1 alpha 1 [Source:HGNC Symbol;Acc:3189]                                           | chr6  | 74225473  | 74233520  |
| EEFSEC     | eukaryotic elongation factor, selenocysteine-tRNA-specific [Source:HGNC Symbol;Acc:24614]                                  | chr3  | 127867297 | 128127485 |
| EFHC1      | EF-hand domain (C-terminal) containing 1 [Source:HGNC Symbol;Acc:16406]                                                    | chr6  | 52285106  | 52387892  |
| EIF3A      | eukaryotic translation initiation factor 3, subunit A [Source:HGNC Symbol;Acc:3271]                                        | chr10 | 120794356 | 120840396 |
| EIF4A1     | eukaryotic translation initiation factor 4A1 [Source:HGNC Symbol;Acc:3282]                                                 | chr17 | 7476024   | 7482323   |
| EIF4A2     | eukaryotic translation initiation factor 4A2 [Source:HGNC Symbol;Acc:3284]                                                 | chr3  | 186500994 | 186507689 |
| ELK3       | ELK3, ETS-domain protein (SRF accessory protein 2) [Source:HGNC Symbol;Acc:3325]                                           | chr12 | 96588160  | 96663613  |
| EMP1       | epithelial membrane protein 1 [Source:HGNC Symbol;Acc:3333]                                                                | chr12 | 13349650  | 13369708  |
| ENTPD7     | ectonucleoside triphosphate diphosphohydrolase 7 [Source:HGNC Symbol;Acc:19745]                                            | chr10 | 101419263 | 101465997 |
| EPB41L2    | erythrocyte membrane protein band 4.1-like 2 [Source:HGNC Symbol;Acc:3379]                                                 | chr6  | 131160487 | 131384462 |
| EPT1       | ethanolaminephosphotransferase 1 (CDP-ethanolamine-specific) [Source:HGNC Symbol;Acc:29361]                                | chr2  | 26531415  | 26618759  |
| ERGIC2     | ERGIC and golgi 2 [Source:HGNC Symbol;Acc:30208]                                                                           | chr12 | 29490285  | 29534122  |
| ERLEC1     | endoplasmic reticulum lectin 1 [Source:HGNC Symbol;Acc:25222]                                                              | chr2  | 54014181  | 54045956  |
| ERRF1      | ERBB receptor feedback inhibitor 1 [Source:HGNC Symbol;Acc:18185]                                                          | chr1  | 8064464   | 8086368   |
| ESCO2      | establishment of cohesion 1 homolog 2 (S. cerevisiae) [Source:HGNC Symbol;Acc:27230]                                       | chr8  | 27629466  | 27670157  |
| EVA1C      | eva-1 homolog C (C. elegans) [Source:HGNC Symbol;Acc:13239]                                                                | chr21 | 33784314  | 33887707  |
| EXOC5      | exocyst complex component 5 [Source:HGNC Symbol;Acc:10696]                                                                 | chr14 | 57670518  | 57735726  |
| EXOSC8     | exosome component 8 [Source:HGNC Symbol;Acc:17035]                                                                         | chr13 | 37572953  | 37583750  |
| EYA4       | eyes absent homolog 4 (Drosophila) [Source:HGNC Symbol;Acc:3522]                                                           | chr6  | 133556736 | 133853258 |
| FAM114A1   | family with sequence similarity 114, member A1 [Source:HGNC Symbol;Acc:25087]                                              | chr4  | 38869298  | 38947360  |
| FAM115A    | family with sequence similarity 115, member A [Source:HGNC Symbol;Acc:22201]                                               | chr7  | 143548468 | 143599291 |
| FAM149B1   | family with sequence similarity 149, member B1 [Source:HGNC Symbol;Acc:29162]                                              | chr10 | 74927924  | 75004262  |
| FAM178A    | family with sequence similarity 178, member A [Source:HGNC Symbol;Acc:17814]                                               | chr10 | 102672720 | 102724893 |
| FAM193A    | family with sequence similarity 193, member A [Source:HGNC Symbol;Acc:16822]                                               | chr4  | 2626988   | 2734292   |
| FAM49B     | family with sequence similarity 49, member B [Source:HGNC Symbol;Acc:25216]                                                | chr8  | 130851839 | 131034375 |
| FAM5B      | family with sequence similarity 5, member B [Source:HGNC Symbol;Acc:13746]                                                 | chr1  | 177140633 | 177251558 |
| FAT4       | FAT tumor suppressor homolog 4 (Drosophila) [Source:HGNC Symbol;Acc:23109]                                                 | chr4  | 126237554 | 126414087 |
| FBXL5      | F-box and leucine-rich repeat protein 5 [Source:HGNC Symbol;Acc:13602]                                                     | chr4  | 15606162  | 15683302  |
| FBXO34     | F-box protein 34 [Source:HGNC Symbol;Acc:20201]                                                                            | chr14 | 55738021  | 55828636  |
| FBXO42     | F-box protein 42 [Source:HGNC Symbol;Acc:29249]                                                                            | chr1  | 16573334  | 16678949  |
| FHL2       | four and a half LIM domains 2 [Source:HGNC Symbol;Acc:3703]                                                                | chr2  | 105974169 | 106054960 |
| FOXO3      | forkhead box O3 [Source:HGNC Symbol;Acc:3821]                                                                              | chr6  | 108876038 | 109005977 |
| FPR1       | formyl peptide receptor 1 [Source:HGNC Symbol;Acc:3826]                                                                    | chr19 | 52248425  | 52312363  |
| FREM3      | FRAS1 related extracellular matrix 3 [Source:HGNC Symbol;Acc:25172]                                                        | chr4  | 144498455 | 144621828 |
| FRMD5      | FERM domain containing 5 [Source:HGNC Symbol;Acc:28214]                                                                    | chr15 | 44162962  | 44492450  |
| FRYL       | FRY-like [Source:HGNC Symbol;Acc:29127]                                                                                    | chr4  | 48499378  | 48782339  |
| FTSJ2      | FtsJ methyltransferase domain containing 2 [Source:HGNC Symbol;Acc:21077]                                                  | chr6  | 37400995  | 37450603  |
| GABPB1     | GA binding protein transcription factor, beta subunit 1 [Source:HGNC Symbol;Acc:4074]                                      | chr15 | 50569389  | 50647605  |
| GAD1       | glutamate decarboxylase 1 (brain, 67kDa) [Source:HGNC Symbol;Acc:4092]                                                     | chr2  | 171669723 | 171717661 |
| GAPVD1     | GTPase activating protein and VPS9 domains 1 [Source:HGNC Symbol;Acc:23375]                                                | chr9  | 128024073 | 128129486 |
| GARNL3     | GTPase activating Rap/RanGAP domain-like 3 [Source:HGNC Symbol;Acc:25425]                                                  | chr9  | 129981544 | 130155939 |
| GEMIN6     | gem (nuclear organelle) associated protein 6 [Source:HGNC Symbol;Acc:20044]                                                | chr2  | 38973676  | 39009598  |
| GIPC2      | GIPC PDZ domain containing family, member 2 [Source:HGNC Symbol;Acc:18177]                                                 | chr1  | 78445226  | 78604133  |
| GNAI3      | guanine nucleotide binding protein (G protein), alpha inhibiting activity polypeptide 3 [Source:HGNC Symbol;Acc:110136975] | chr1  | 110086233 | 110136975 |
| GPR113     | G protein-coupled receptor 113 [Source:HGNC Symbol;Acc:18989]                                                              | chr2  | 26531041  | 26569685  |
| GPSM2      | G-protein signaling modulator 2 [Source:HGNC Symbol;Acc:29501]                                                             | chr1  | 109417972 | 109473044 |
| GRB10      | growth factor receptor-bound protein 10 [Source:HGNC Symbol;Acc:4564]                                                      | chr7  | 50657760  | 50866159  |
| GSN        | gelsolin [Source:HGNC Symbol;Acc:4620]                                                                                     | chr9  | 123970078 | 124095121 |
| GTF2IRD2   | GTF2I repeat domain containing 2 [Source:HGNC Symbol;Acc:30775]                                                            | chr7  | 74210483  | 74267847  |
| GXYLT2     | glucoside xylosyltransferase 2 [Source:HGNC Symbol;Acc:33383]                                                              | chr3  | 72937224  | 73047289  |
| HEG1       | heart development protein with EGF-like domains 1 [Source:HGNC Symbol;Acc:29227]                                           | chr3  | 124684554 | 124779802 |
| HERC5      | HECT and RLD domain containing E3 ubiquitin protein ligase 5 [Source:HGNC Symbol;Acc:24368]                                | chr4  | 89378268  | 89427314  |
| HERPUD2    | HERPUD family member 2 [Source:HGNC Symbol;Acc:21915]                                                                      | chr7  | 35672269  | 35735181  |
| HIPK2      | homeodomain interacting protein kinase 2 [Source:HGNC Symbol;Acc:14402]                                                    | chr7  | 139246316 | 139482577 |
| HIPK3      | homeodomain interacting protein kinase 3 [Source:HGNC Symbol;Acc:4915]                                                     | chr11 | 33278218  | 33378569  |

table S3. Genes with significant transposon integrations in both RKO *BRAF<sup>wt/-</sup>* and *DLD-1 KRAS<sup>wt/-</sup>* libraries

| Gene ID      | description                                                                                                 | Chrom | Start     | End       |
|--------------|-------------------------------------------------------------------------------------------------------------|-------|-----------|-----------|
| HIST1H1C     | histone cluster 1, H1c [Source:HGNC Symbol;Acc:4716]                                                        | chr6  | 26055968  | 26061699  |
| HLA-AS1      | HLA antisense RNA 1 [Source:HGNC Symbol;Acc:42509]                                                          | chr1  | 221006105 | 221053482 |
| HMG20A       | high mobility group 20A [Source:HGNC Symbol;Acc:5001]                                                       | chr15 | 77712754  | 77777949  |
| HMG2         | high mobility group AT-hook 2 [Source:HGNC Symbol;Acc:5009]                                                 | chr12 | 66217911  | 66360075  |
| HMG1         | high mobility group box 1 [Source:HGNC Symbol;Acc:4983]                                                     | chr13 | 31032884  | 31196734  |
| HNRNPA3      | heterogeneous nuclear ribonucleoprotein A3 [Source:HGNC Symbol;Acc:24941]                                   | chr2  | 178077291 | 178088686 |
| HOOK2        | hook homolog 2 (Drosophila) [Source:HGNC Symbol;Acc:19885]                                                  | chr19 | 12873817  | 12983554  |
| HPSE         | heparanase [Source:HGNC Symbol;Acc:5164]                                                                    | chr4  | 84213614  | 84261306  |
| HSDL2        | hydroxysteroid dehydrogenase like 2 [Source:HGNC Symbol;Acc:18572]                                          | chr9  | 115142217 | 115234690 |
| HSPA4L       | heat shock 70kDa protein 4-like [Source:HGNC Symbol;Acc:17041]                                              | chr4  | 128702976 | 128755226 |
| HUNK         | hormonally up-regulated Neu-associated kinase [Source:HGNC Symbol;Acc:13326]                                | chr21 | 33245628  | 33416946  |
| HUS1         | HUS1 checkpoint homolog (S. pombe) [Source:HGNC Symbol;Acc:5309]                                            | chr7  | 47735328  | 48024178  |
| IAH1         | isoamyl acetate-hydrolyzing esterase 1 homolog (S. cerevisiae) [Source:HGNC Symbol;Acc:27696]               | chr2  | 9608787   | 9636672   |
| IARS         | isoleucyl-tRNA synthetase [Source:HGNC Symbol;Acc:5330]                                                     | chr9  | 94972489  | 95056038  |
| IARS2        | isoleucyl-tRNA synthetase 2, mitochondrial [Source:HGNC Symbol;Acc:29685]                                   | chr1  | 220267444 | 220321380 |
| ICK          | intestinal cell (MAK-like) kinase [Source:HGNC Symbol;Acc:21219]                                            | chr6  | 52866077  | 52926600  |
| IL13RA1      | interleukin 13 receptor, alpha 1 [Source:HGNC Symbol;Acc:5974]                                              | chrX  | 117861535 | 117928502 |
| ING3         | inhibitor of growth family, member 3 [Source:HGNC Symbol;Acc:14587]                                         | chr7  | 120590803 | 120617270 |
| INMT-FAM188B | INMT-FAM188B readthrough (non-protein coding) [Source:HGNC Symbol;Acc:41995]                                | chr7  | 30791753  | 30931696  |
| INTU         | inturned planar cell polarity protein [Source:HGNC Symbol;Acc:29239]                                        | chr4  | 128544426 | 128637930 |
| IPO5         | importin 5 [Source:HGNC Symbol;Acc:6402]                                                                    | chr13 | 98605912  | 98676551  |
| IQCB1        | IQ motif containing B1 [Source:HGNC Symbol;Acc:28949]                                                       | chr3  | 121488610 | 121553926 |
| IQCH         | IQ motif containing H [Source:HGNC Symbol;Acc:25721]                                                        | chr15 | 67542138  | 67794598  |
| ISM1         | isthmin 1, angiogenesis inhibitor [Source:HGNC Symbol;Acc:16213]                                            | chr20 | 13197418  | 13281298  |
| IWS1         | IWS1 homolog (S. cerevisiae) [Source:HGNC Symbol;Acc:25467]                                                 | chr2  | 128193783 | 128284462 |
| JAK1         | Janus kinase 1 [Source:HGNC Symbol;Acc:6190]                                                                | chr1  | 65298912  | 65432187  |
| JUN          | jun proto-oncogene [Source:HGNC Symbol;Acc:6204]                                                            | chr1  | 59246465  | 59249785  |
| KANK4        | KN motif and ankyrin repeat domains 4 [Source:HGNC Symbol;Acc:27263]                                        | chr1  | 62702651  | 62790085  |
| KCTD1        | potassium channel tetramerization domain containing 1 [Source:HGNC Symbol;Acc:18249]                        | chr18 | 24034874  | 24242365  |
| KIAA0922     | KIAA0922 [Source:HGNC Symbol;Acc:29146]                                                                     | chr4  | 154387498 | 154557863 |
| KIAA1324     | KIAA1324 [Source:HGNC Symbol;Acc:29618]                                                                     | chr1  | 109656301 | 109749401 |
| KIAA1468     | KIAA1468 [Source:HGNC Symbol;Acc:29289]                                                                     | chr18 | 59854491  | 59974355  |
| KIAA1549L    | KIAA1549-like [Source:HGNC Symbol;Acc:24836]                                                                | chr11 | 33563618  | 33695648  |
| KIF13A       | kinesin family member 13A [Source:HGNC Symbol;Acc:14566]                                                    | chr6  | 17759414  | 17987854  |
| KIFC3        | kinesin family member C3 [Source:HGNC Symbol;Acc:6326]                                                      | chr16 | 57792129  | 57896957  |
| KITLG        | KIT ligand [Source:HGNC Symbol;Acc:6343]                                                                    | chr12 | 88886570  | 88974628  |
| LACTB2       | lactamase, beta 2 [Source:HGNC Symbol;Acc:18512]                                                            | chr8  | 71547553  | 71586409  |
| LAMTOR5-AS1  | LAMTOR5 antisense RNA 1 [Source:HGNC Symbol;Acc:40823]                                                      | chr1  | 110925441 | 110974982 |
| LCOR         | ligand dependent nuclear receptor corepressor [Source:HGNC Symbol;Acc:29503]                                | chr10 | 98592017  | 98740800  |
| LGALS8       | lectin, galactoside-binding, soluble, 8 [Source:HGNC Symbol;Acc:6569]                                       | chr1  | 236676300 | 236716281 |
| LHFPL2       | lipoma HMGIC fusion partner-like 2 [Source:HGNC Symbol;Acc:6588]                                            | chr5  | 77781038  | 78065844  |
| LIMCH1       | LIM and calponin homology domains 1 [Source:HGNC Symbol;Acc:29191]                                          | chr4  | 41361624  | 41702061  |
| LINC00159    | long intergenic non-protein coding RNA 159 [Source:HGNC Symbol;Acc:1285]                                    | chr21 | 33452629  | 33570125  |
| LINC00472    | long intergenic non-protein coding RNA 472 [Source:HGNC Symbol;Acc:21380]                                   | chr6  | 72054047  | 72130472  |
| LINC00525    | long intergenic non-protein coding RNA 525 [Source:HGNC Symbol;Acc:40290]                                   | chr7  | 47796074  | 47806370  |
| LIPA         | lipase A, lysosomal acid, cholesterol esterase [Source:HGNC Symbol;Acc:6617]                                | chr10 | 90973326  | 91174314  |
| LNPEP        | leucyl/cystinyl aminopeptidase [Source:HGNC Symbol;Acc:6656]                                                | chr5  | 96271098  | 96373219  |
| LPP          | LIM domain containing preferred translocation partner in lipoma [Source:HGNC Symbol;Acc:6679]               | chr3  | 187871072 | 188608460 |
| LRCH3        | leucine-rich repeats and calponin homology (CH) domain containing 3 [Source:HGNC Symbol;Acc:28637]          | chr3  | 197518097 | 197615307 |
| LRIG1        | leucine-rich repeats and immunoglobulin-like domains 1 [Source:HGNC Symbol;Acc:17360]                       | chr3  | 66429221  | 66551687  |
| LRRC37A16P   | leucine rich repeat containing 37, member A16, pseudogene [Source:HGNC Symbol;Acc:43820]                    | chr17 | 66121918  | 66148609  |
| LRRK1        | leucine-rich repeat kinase 1 [Source:HGNC Symbol;Acc:18608]                                                 | chr15 | 101459420 | 101610317 |
| LUC7L3       | LUC7-like 3 (S. cerevisiae) [Source:HGNC Symbol;Acc:24309]                                                  | chr17 | 48796905  | 48833574  |
| LURAP1L      | leucine rich adaptor protein 1-like [Source:HGNC Symbol;Acc:31452]                                          | chr9  | 12775020  | 12822130  |
| LYPLAL1      | lysophospholipase-like 1 [Source:HGNC Symbol;Acc:20440]                                                     | chr1  | 219347186 | 219386207 |
| LYSMD2       | LysM, putative peptidoglycan-binding, domain containing 2 [Source:HGNC Symbol;Acc:28571]                    | chr15 | 52015208  | 52043282  |
| MALAT1       | metastasis associated lung adenocarcinoma transcript 1 (non-protein coding) [Source:HGNC Symbol;Acc:6819]   | chr11 | 65265233  | 65273940  |
| MALT1        | mucosa associated lymphoid tissue lymphoma translocation gene 1 [Source:HGNC Symbol;Acc:6819]               | chr18 | 56338618  | 56417371  |
| MAP3K1       | mitogen-activated protein kinase kinase kinase 1, E3 ubiquitin protein ligase [Source:HGNC Symbol;Acc:6865] | chr5  | 56111401  | 56191979  |
| MAP3K7       | mitogen-activated protein kinase kinase kinase 7 [Source:HGNC Symbol;Acc:6859]                              | chr6  | 91223292  | 91296764  |
| MAP3K9       | mitogen-activated protein kinase kinase kinase 9 [Source:HGNC Symbol;Acc:6861]                              | chr14 | 71189243  | 71281251  |
| MAP4K3       | mitogen-activated protein kinase kinase kinase kinase 3 [Source:HGNC Symbol;Acc:6865]                       | chr2  | 39476407  | 39664453  |
| MAPK9        | mitogen-activated protein kinase 9 [Source:HGNC Symbol;Acc:6886]                                            | chr5  | 179660143 | 179724099 |
| MAPKAPK2     | mitogen-activated protein kinase-activated protein kinase 2 [Source:HGNC Symbol;Acc:6887]                   | chr1  | 206858289 | 206907628 |
| MATR3        | matrin 3 [Source:HGNC Symbol;Acc:6912]                                                                      | chr5  | 138609441 | 138667360 |
| MB21D2       | Mab-21 domain containing 2 [Source:HGNC Symbol;Acc:30438]                                                   | chr3  | 192514604 | 192635950 |
| MBNL1        | muscleblind-like splicing regulator 1 [Source:HGNC Symbol;Acc:6923]                                         | chr3  | 151961617 | 152183569 |
| MCC          | mutated in colorectal cancers [Source:HGNC Symbol;Acc:6935]                                                 | chr5  | 112357796 | 112829527 |
| MDM1         | Mdm1 nuclear protein homolog (mouse) [Source:HGNC Symbol;Acc:29917]                                         | chr12 | 68666223  | 68726161  |
| MET          | met proto-oncogene (hepatocyte growth factor receptor) [Source:HGNC Symbol;Acc:7029]                        | chr7  | 116312444 | 116438440 |
| METAP1       | methionyl aminopeptidase 1 [Source:HGNC Symbol;Acc:15789]                                                   | chr4  | 99916771  | 99983964  |
| MFHAS1       | malignant fibrous histiocytoma amplified sequence 1 [Source:HGNC Symbol;Acc:16982]                          | chr8  | 8640864   | 8751155   |
| MFSD1        | major facilitator superfamily domain containing 1 [Source:HGNC Symbol;Acc:25874]                            | chr3  | 158449987 | 158547508 |
| MIR31HG      | MIR31 host gene (non-protein coding) [Source:HGNC Symbol;Acc:37187]                                         | chr9  | 21455641  | 21559688  |
| MKKS         | McKusick-Kaufman syndrome [Source:HGNC Symbol;Acc:7108]                                                     | chr20 | 103085832 | 10414870  |
| MKX          | mohawk homeobox [Source:HGNC Symbol;Acc:23729]                                                              | chr10 | 27961804  | 28039989  |
| MORF4L1      | mortality factor 4 like 1 [Source:HGNC Symbol;Acc:16989]                                                    | chr15 | 79102829  | 79190475  |
| MPP7         | membrane protein, palmitoylated 7 (MAGUK p55 subfamily member 7) [Source:HGNC Symbol;Acc:26542]             | chr10 | 28339922  | 28628415  |
| MRV1         | murine retrovirus integration site 1 homolog [Source:HGNC Symbol;Acc:7237]                                  | chr11 | 10594638  | 10720535  |
| MSRB3        | methionine sulfoxide reductase B3 [Source:HGNC Symbol;Acc:27375]                                            | chr12 | 65672423  | 65882024  |
| MXI1         | MAX interactor 1, dimerization protein [Source:HGNC Symbol;Acc:7534]                                        | chr10 | 111967363 | 112047123 |
| MYO16-AS1    | MYO16 antisense RNA 1 [Source:HGNC Symbol;Acc:39913]                                                        | chr13 | 109816250 | 109858831 |
| MYO1B        | myosin IB [Source:HGNC Symbol;Acc:7596]                                                                     | chr2  | 192109911 | 192290115 |
| MYO5B        | myosin VB [Source:HGNC Symbol;Acc:7603]                                                                     | chr18 | 47349183  | 47726463  |
| MYSM1        | Myb-like, SWIRM and MPN domains 1 [Source:HGNC Symbol;Acc:29401]                                            | chr1  | 59120411  | 59165764  |
| NAA15        | N(alpha)-acetyltransferase 15, NatA auxiliary subunit [Source:HGNC Symbol;Acc:30782]                        | chr4  | 140222609 | 140341187 |
| NAA25        | N(alpha)-acetyltransferase 25, NatB auxiliary subunit [Source:HGNC Symbol;Acc:25783]                        | chr12 | 112464500 | 112551826 |
| NAA60        | N(alpha)-acetyltransferase 60, NatF catalytic subunit [Source:HGNC Symbol;Acc:25875]                        | chr16 | 3493611   | 3536963   |
| NCK1         | NCK adaptor protein 1 [Source:HGNC Symbol;Acc:7664]                                                         | chr3  | 136581050 | 136668665 |
| NCOA3        | nuclear receptor coactivator 3 [Source:HGNC Symbol;Acc:7670]                                                | chr20 | 46130601  | 46285621  |

**table S3. Genes with significant transposon integrations in both RKO *BRAF<sup>wt/-</sup>* and *DLD-1 KRAS<sup>wt/-</sup>* libraries**

| Gene ID    | description                                                                                                                        | Chrom | Start     | End       |
|------------|------------------------------------------------------------------------------------------------------------------------------------|-------|-----------|-----------|
| NCOR2      | nuclear receptor corepressor 2 [Source:HGNC Symbol;Acc:7673]                                                                       | chr12 | 124808961 | 125052135 |
| NDUFAF2    | NADH dehydrogenase (ubiquinone) complex I, assembly factor 2 [Source:HGNC Symbol;Acc:28086]                                        | chr5  | 60235956  | 60448853  |
| NEDD4L     | neural precursor cell expressed, developmentally down-regulated 4-like, E3 ubiquitin protein ligase [Source:HGNC Symbol;Acc:22945] | chr18 | 55711599  | 56068772  |
| NF2        | neurofibromin 2 (merlin) [Source:HGNC Symbol;Acc:7773]                                                                             | chr22 | 29999545  | 30094587  |
| NKIRAS1    | NFKB inhibitor interacting Ras-like 1 [Source:HGNC Symbol;Acc:17899]                                                               | chr3  | 23933151  | 23988082  |
| NLRP11     | NLR family, pyrin domain containing 11 [Source:HGNC Symbol;Acc:22945]                                                              | chr19 | 56296770  | 56348166  |
| NMNAT1     | nicotinamide nucleotide adenyltransferase 1 [Source:HGNC Symbol;Acc:17877]                                                         | chr1  | 10003486  | 10045559  |
| NOSTRIN    | nitric oxide synthase trafficker [Source:HGNC Symbol;Acc:20203]                                                                    | chr2  | 169643049 | 169722024 |
| NOVA1-AS1  | NOVA1 antisense RNA 1 (head to head) [Source:HGNC Symbol;Acc:19827]                                                                | chr14 | 27062618  | 27275673  |
| NPAS2      | neuronal PAS domain protein 2 [Source:HGNC Symbol;Acc:7895]                                                                        | chr2  | 101431614 | 101613291 |
| NPTN       | neuroligin 1 [Source:HGNC Symbol;Acc:17867]                                                                                        | chr15 | 73852355  | 73926475  |
| NR2C2      | nuclear receptor subfamily 2, group C, member 2 [Source:HGNC Symbol;Acc:7972]                                                      | chr3  | 14989091  | 15095107  |
| NR2F2-AS1  | NR2F2 antisense RNA 1 [Source:HGNC Symbol;Acc:44222]                                                                               | chr15 | 96670598  | 96875590  |
| NSMAF      | neutral sphingomyelinase (N-SMase) activation associated factor [Source:HGNC Symbol;Acc:8017]                                      | chr8  | 59496063  | 59577403  |
| NSMCE2     | non-SMC element 2, MMS21 homolog (S. cerevisiae) [Source:HGNC Symbol;Acc:26513]                                                    | chr8  | 126103921 | 126379362 |
| NUDT5      | nudix (nucleoside diphosphate linked moiety X)-type motif 5 [Source:HGNC Symbol;Acc:8052]                                          | chr10 | 12207324  | 12238143  |
| NUP214     | nucleoporin 214kDa [Source:HGNC Symbol;Acc:8064]                                                                                   | chr9  | 134000948 | 134110057 |
| NUP35      | nucleoporin 35kDa [Source:HGNC Symbol;Acc:29797]                                                                                   | chr2  | 183977241 | 184026408 |
| NUP62CL    | nucleoporin 62kDa C-terminal like [Source:HGNC Symbol;Acc:25960]                                                                   | chrX  | 106366657 | 106449670 |
| OSBPL6     | oxysterol binding protein-like 6 [Source:HGNC Symbol;Acc:16388]                                                                    | chr2  | 179059208 | 179264160 |
| OSTCP1     | oligosaccharyltransferase complex subunit pseudogene 1 [Source:HGNC Symbol;Acc:30530]                                              | chr6  | 159262149 | 159278664 |
| OXSR1      | oxidative stress responsive 1 [Source:HGNC Symbol;Acc:8508]                                                                        | chr3  | 38201580  | 38296979  |
| PACGIN2    | protein kinase C and casein kinase substrate in neurons 2 [Source:HGNC Symbol;Acc:8571]                                            | chr22 | 43231418  | 43416151  |
| PAK2       | p21 protein (Cdc42/Rac)-activated kinase 2 [Source:HGNC Symbol;Acc:8591]                                                           | chr3  | 196466728 | 196559518 |
| PARN       | poly(A)-specific ribonuclease [Source:HGNC Symbol;Acc:8609]                                                                        | chr16 | 14529558  | 14731585  |
| PAWR       | PRKC, apoptosis, WT1, regulator [Source:HGNC Symbol;Acc:8614]                                                                      | chr12 | 79968759  | 80089877  |
| PCBP1-AS1  | PCBP1 antisense RNA 1 [Source:HGNC Symbol;Acc:42948]                                                                               | chr2  | 70189395  | 70315978  |
| PCDH7      | protocadherin 7 [Source:HGNC Symbol;Acc:8659]                                                                                      | chr4  | 30722037  | 31148422  |
| PCNXL4     | pecanex-like 4 (Drosophila) [Source:HGNC Symbol;Acc:20349]                                                                         | chr14 | 60558629  | 60635851  |
| PDCD2      | programmed cell death 2 [Source:HGNC Symbol;Acc:8762]                                                                              | chr6  | 170884383 | 170893780 |
| PDE12      | phosphodiesterase 12 [Source:HGNC Symbol;Acc:25386]                                                                                | chr3  | 57537003  | 57552571  |
| PDE6D      | phosphodiesterase 6D, cGMP-specific, rod, delta [Source:HGNC Symbol;Acc:8788]                                                      | chr2  | 232597135 | 232650982 |
| PDP1       | pyruvate dehydrogenase phosphatase catalytic subunit 1 [Source:HGNC Symbol;Acc:9279]                                               | chr8  | 94870035  | 94938294  |
| PDSS1      | prenyl (decaprenyl) diphosphate synthase, subunit 1 [Source:HGNC Symbol;Acc:17759]                                                 | chr10 | 26986588  | 27035727  |
| PELL1      | pellino E3 ubiquitin protein ligase 1 [Source:HGNC Symbol;Acc:8827]                                                                | chr2  | 64319786  | 64371588  |
| PER2       | period circadian clock 2 [Source:HGNC Symbol;Acc:8846]                                                                             | chr2  | 239152679 | 239198743 |
| PFKFB      | phosphofructokinase, platelet [Source:HGNC Symbol;Acc:8878]                                                                        | chr10 | 3104712   | 3179904   |
| PHACTR4    | phosphatase and actin regulator 4 [Source:HGNC Symbol;Acc:25793]                                                                   | chr1  | 28696114  | 28826881  |
| PHEx       | phosphate regulating endopeptidase homolog, X-linked [Source:HGNC Symbol;Acc:8918]                                                 | chrX  | 22050559  | 22269427  |
| PHLDB2     | pleckstrin homology-like domain, family B, member 2 [Source:HGNC Symbol;Acc:29573]                                                 | chr3  | 111451344 | 111695364 |
| PI4K2B     | phosphatidylinositol 4-kinase type 2 beta [Source:HGNC Symbol;Acc:18215]                                                           | chr4  | 25162263  | 25280714  |
| PIK3CB     | phosphatidylinositol-4,5-bisphosphate 3-kinase, catalytic subunit beta [Source:HGNC Symbol;Acc:8976]                               | chr3  | 138372860 | 138558780 |
| PISD       | phosphatidylserine decarboxylase [Source:HGNC Symbol;Acc:8999]                                                                     | chr22 | 32014477  | 32058418  |
| PJA2       | praja ring finger 2, E3 ubiquitin protein ligase [Source:HGNC Symbol;Acc:17481]                                                    | chr5  | 108670410 | 108745695 |
| PKM        | pyruvate kinase, muscle [Source:HGNC Symbol;Acc:9021]                                                                              | chr15 | 72491370  | 72524164  |
| PKP4       | plakophilin 4 [Source:HGNC Symbol;Acc:9026]                                                                                        | chr2  | 159308476 | 159539391 |
| PLAC1      | placenta-specific 1 [Source:HGNC Symbol;Acc:9044]                                                                                  | chrX  | 133699868 | 133898352 |
| PLAC1L     | placenta-specific 1-like [Source:HGNC Symbol;Acc:26699]                                                                            | chr11 | 59807748  | 59815517  |
| PPP1R42    | protein phosphatase 1, regulatory subunit 42 [Source:HGNC Symbol;Acc:33732]                                                        | chr8  | 67876334  | 67968839  |
| PPP3CA     | protein phosphatase 3, catalytic subunit, alpha isozyme [Source:HGNC Symbol;Acc:9314]                                              | chr4  | 101944566 | 102269435 |
| PPP4R1     | protein phosphatase 4, regulatory subunit 1 [Source:HGNC Symbol;Acc:9320]                                                          | chr18 | 9546789   | 9615238   |
| PRDX1      | peroxiredoxin 1 [Source:HGNC Symbol;Acc:9352]                                                                                      | chr1  | 45976708  | 45988719  |
| PREP       | prolyl endopeptidase [Source:HGNC Symbol;Acc:9358]                                                                                 | chr6  | 105725440 | 105850959 |
| PRIM2      | primase, DNA, polypeptide 2 (58kDa) [Source:HGNC Symbol;Acc:9370]                                                                  | chr6  | 57179603  | 57153375  |
| PRRC1      | proline-rich coiled-coil 1 [Source:HGNC Symbol;Acc:28164]                                                                          | chr5  | 126853301 | 126890781 |
| PRRG1      | proline rich Gla (G-carboxyglutamic acid) 1 [Source:HGNC Symbol;Acc:9469]                                                          | chrX  | 37208528  | 37316548  |
| PSMC6      | proteasome (prosome, macropain) 26S subunit, ATPase, 6 [Source:HGNC Symbol;Acc:9553]                                               | chr14 | 53173890  | 53195305  |
| PTCHD1     | patched domain containing 1 [Source:HGNC Symbol;Acc:26392]                                                                         | chrX  | 23352133  | 23422489  |
| PTPN1      | protein tyrosine phosphatase, non-receptor type 1 [Source:HGNC Symbol;Acc:9642]                                                    | chr20 | 49126891  | 49201299  |
| PVT1       | Pvt1 oncogene (non-protein coding) [Source:HGNC Symbol;Acc:9709]                                                                   | chr8  | 128806779 | 129113499 |
| RAB10      | RAB10, member RAS oncogene family [Source:HGNC Symbol;Acc:9759]                                                                    | chr2  | 26256976  | 26360323  |
| RAB11FIP2  | RAB11 family interacting protein 2 (class I) [Source:HGNC Symbol;Acc:29152]                                                        | chr10 | 119764427 | 119806114 |
| RAB5A      | RAB5A, member RAS oncogene family [Source:HGNC Symbol;Acc:9783]                                                                    | chr3  | 19988571  | 20026667  |
| RAD23B     | RAD23 homolog B (S. cerevisiae) [Source:HGNC Symbol;Acc:9813]                                                                      | chr9  | 110045418 | 110094475 |
| RAD52      | RAD52 homolog (S. cerevisiae) [Source:HGNC Symbol;Acc:9824]                                                                        | chr12 | 1021243   | 1100356   |
| RAPGEF5    | Rap guanine nucleotide exchange factor (GEF) 5 [Source:HGNC Symbol;Acc:16862]                                                      | chr7  | 22157856  | 22401763  |
| RBM12B     | RNA binding motif protein 12B [Source:HGNC Symbol;Acc:32310]                                                                       | chr8  | 94741584  | 94753245  |
| RBM14-RBM4 | RBM14-RBM4 readthrough [Source:HGNC Symbol;Acc:38840]                                                                              | chr11 | 66384097  | 66413940  |
| RBM17      | RNA binding motif protein 17 [Source:HGNC Symbol;Acc:16944]                                                                        | chr10 | 6130950   | 6159420   |
| RBM4       | RNA binding motif protein 4 [Source:HGNC Symbol;Acc:9901]                                                                          | chr11 | 66384097  | 66434153  |
| RBM6       | RNA binding motif protein 6 [Source:HGNC Symbol;Acc:9903]                                                                          | chr3  | 49977440  | 50137478  |
| RCOR3      | REST corepressor 3 [Source:HGNC Symbol;Acc:25594]                                                                                  | chr1  | 211431719 | 211489727 |
| RDX        | radixin [Source:HGNC Symbol;Acc:9944]                                                                                              | chr11 | 110045605 | 110172447 |
| RG7        | regulator of G-protein signaling 7 [Source:HGNC Symbol;Acc:10003]                                                                  | chr1  | 240931554 | 241525530 |
| RHOBTB3    | Rho-related BTB domain containing 3 [Source:HGNC Symbol;Acc:18757]                                                                 | chr5  | 95049226  | 95160087  |
| RNF11      | ring finger protein 11 [Source:HGNC Symbol;Acc:10056]                                                                              | chr1  | 51701943  | 51739127  |
| RNF150     | ring finger protein 150 [Source:HGNC Symbol;Acc:23138]                                                                             | chr4  | 141786725 | 142139031 |
| RNF168     | ring finger protein 168, E3 ubiquitin protein ligase [Source:HGNC Symbol;Acc:26661]                                                | chr3  | 196195654 | 196230639 |
| RNF217     | ring finger protein 217 [Source:HGNC Symbol;Acc:21487]                                                                             | chr6  | 125283691 | 125413779 |
| ROCK2      | Rho-associated, coiled-coil containing protein kinase 2 [Source:HGNC Symbol;Acc:10252]                                             | chr2  | 11319887  | 11488456  |
| ROR1       | receptor tyrosine kinase-like orphan receptor 1 [Source:HGNC Symbol;Acc:10256]                                                     | chr1  | 64234693  | 64647181  |
| RPL7       | ribosomal protein L7 [Source:HGNC Symbol;Acc:10363]                                                                                | chr8  | 74202506  | 74208024  |
| RPSAP52    | ribosomal protein SA pseudogene 52 [Source:HGNC Symbol;Acc:35752]                                                                  | chr12 | 66151800  | 66225754  |
| RTN3       | reticulon 3 [Source:HGNC Symbol;Acc:10469]                                                                                         | chr11 | 63448918  | 63527363  |
| S100BPB    | S100P binding protein [Source:HGNC Symbol;Acc:25768]                                                                               | chr1  | 33282368  | 33324476  |
| SATB2      | SATB homeobox 2 [Source:HGNC Symbol;Acc:21637]                                                                                     | chr2  | 200134223 | 200340989 |
| SATB2-AS1  | SATB2 antisense RNA 1 [Source:HGNC Symbol;Acc:26490]                                                                               | chr2  | 200317423 | 200341658 |
| SBSFON     | sermatomedin B and thrombospondin, type 1 domain containing [Source:HGNC Symbol;Acc:30362]                                         | chr8  | 7976775   | 74041323  |
| SCAF11     | SR-related CTD-associated factor 11 [Source:HGNC Symbol;Acc:10784]                                                                 | chr12 | 46312914  | 46385903  |
| SEMA5A     | sema domain, seven thrombospondin repeats (type 1 and type 1-like), transmembrane domain (TM) and s                                | chr5  | 9035138   | 9551187   |

**table S3. Genes with significant transposon integrations in both RKO *BRAF<sup>wt/-</sup>* and *DLD-1 KRAS<sup>wt/-</sup>* libraries**

| Gene ID     | description                                                                                                | Chrom | Start     | End       |
|-------------|------------------------------------------------------------------------------------------------------------|-------|-----------|-----------|
| SETD5       | SET domain containing 5 [Source:HGNC Symbol;Acc:25566]                                                     | chr3  | 9439299   | 9520924   |
| SETD5-AS1   | SETD5 antisense RNA 1 [Source:HGNC Symbol;Acc:44478]                                                       | chr3  | 9391373   | 9440263   |
| SETD9       | SET domain containing 9 [Source:HGNC Symbol;Acc:28508]                                                     | chr5  | 56205087  | 56221359  |
| SF3A3       | splicing factor 3a, subunit 3, 60kDa [Source:HGNC Symbol;Acc:10767]                                        | chr1  | 38422647  | 38461593  |
| SF3B3       | splicing factor 3b, subunit 3, 130kDa [Source:HGNC Symbol;Acc:10770]                                       | chr16 | 70557691  | 70608820  |
| SFR1        | SWI5-dependent recombination repair 1 [Source:HGNC Symbol;Acc:29574]                                       | chr10 | 105881816 | 105886143 |
| SGCE        | sarcoglycan, epsilon [Source:HGNC Symbol;Acc:10808]                                                        | chr7  | 94214542  | 94285521  |
| SGPL1       | sphingosine-1-phosphate lyase 1 [Source:HGNC Symbol;Acc:10817]                                             | chr10 | 72575717  | 72640930  |
| SH3BP5      | SH3-domain binding protein 5 (BTK-associated) [Source:HGNC Symbol;Acc:10827]                               | chr3  | 15296360  | 15382875  |
| SH3TC2      | SH3 domain and tetratricopeptide repeats 2 [Source:HGNC Symbol;Acc:29427]                                  | chr5  | 148303202 | 148442726 |
| SHROOM2     | shroom family member 2 [Source:HGNC Symbol;Acc:630]                                                        | chrX  | 9754496   | 9917483   |
| SIAH1       | siah E3 ubiquitin protein ligase 1 [Source:HGNC Symbol;Acc:10857]                                          | chr16 | 48390275  | 48482313  |
| SLC17A5     | solute carrier family 17 (anion/sugar transporter), member 5 [Source:HGNC Symbol;Acc:10933]                | chr6  | 74303102  | 74363878  |
| SLC1A3      | solute carrier family 1 (glial high affinity glutamate transporter), member 3 [Source:HGNC Symbol;Acc:109] | chr5  | 36606457  | 36688436  |
| SLC25A33    | solute carrier family 25 (pyrimidine nucleotide carrier), member 33 [Source:HGNC Symbol;Acc:29681]         | chr1  | 95995941  | 9642831   |
| SLC28A1     | solute carrier family 28 (concentrative nucleoside transporter), member 1 [Source:HGNC Symbol;Acc:110]     | chr15 | 85422885  | 85518876  |
| SLC35F3     | solute carrier family 35, member F3 [Source:HGNC Symbol;Acc:23616]                                         | chr1  | 234035679 | 234460262 |
| SLC44A3     | solute carrier family 44, member 3 [Source:HGNC Symbol;Acc:28689]                                          | chr1  | 95285898  | 95360802  |
| SLC9A4      | solute carrier family 9, subfamily A (NHE4, cation proton antiporter 4), member 4 [Source:HGNC Symbol;A]   | chr2  | 103089762 | 103150431 |
| SLFN5       | schlafen family member 5 [Source:HGNC Symbol;Acc:28286]                                                    | chr17 | 33570055  | 33600674  |
| SMAD2       | SMAD family member 2 [Source:HGNC Symbol;Acc:6768]                                                         | chr18 | 45357922  | 45457515  |
| SMAP2       | small ArfGAP2 [Source:HGNC Symbol;Acc:25082]                                                               | chr1  | 40805522  | 40888998  |
| SMARCE1     | SWI/SNF related, matrix associated, actin dependent regulator of chromatin, subfamily e, member 1 [Sour    | chr17 | 38781214  | 38804760  |
| SMEK2       | SMEK homolog 2, suppressor of mek1 (Dictyostelium) [Source:HGNC Symbol;Acc:29267]                          | chr2  | 55774428  | 55846015  |
| SMYD4       | SET and MYND domain containing 4 [Source:HGNC Symbol;Acc:21067]                                            | chr17 | 1682779   | 1733928   |
| SNRNP200    | small nuclear ribonucleoprotein 200kDa (U5) [Source:HGNC Symbol;Acc:30859]                                 | chr2  | 96940074  | 96971297  |
| SOD2        | superoxide dismutase 2, mitochondrial [Source:HGNC Symbol;Acc:11180]                                       | chr6  | 160100096 | 160183561 |
| SORL1       | sortilin-related receptor, L (DLR class) A repeats containing [Source:HGNC Symbol;Acc:11185]               | chr11 | 121317912 | 121504402 |
| SPC25       | SPC25, NDC80 kinetochore complex component, homolog (S. cerevisiae) [Source:HGNC Symbol;Acc:24]            | chr2  | 169690842 | 169769881 |
| SPEN        | spen homolog, transcriptional regulator (Drosophila) [Source:HGNC Symbol;Acc:17575]                        | chr1  | 16174359  | 16266955  |
| SPIRE1      | spire homolog 1 (Drosophila) [Source:HGNC Symbol;Acc:30622]                                                | chr18 | 12466511  | 124663133 |
| SPTAN1      | spectrin, alpha, non-erythrocytic 1 [Source:HGNC Symbol;Acc:11273]                                         | chr9  | 131314866 | 131395941 |
| SRSF11      | serine/arginine-rich splicing factor 11 [Source:HGNC Symbol;Acc:10782]                                     | chr1  | 70671365  | 70718735  |
| SRSF3       | serine/arginine-rich splicing factor 3 [Source:HGNC Symbol;Acc:10785]                                      | chr6  | 36562145  | 36571209  |
| ST3GAL6     | ST3 beta-galactoside alpha-2,3-sialyltransferase 6 [Source:HGNC Symbol;Acc:18080]                          | chr3  | 98451080  | 98540045  |
| STAG1       | stromal antigen 1 [Source:HGNC Symbol;Acc:11354]                                                           | chr3  | 136055077 | 136471220 |
| STARD4      | STAR-related lipid transfer (START) domain containing 4 [Source:HGNC Symbol;Acc:18058]                     | chr5  | 110831731 | 110853288 |
| STAU2       | staufen double-stranded RNA binding protein 2 [Source:HGNC Symbol;Acc:11371]                               | chr8  | 74332604  | 74664943  |
| STK24       | serine/threonine kinase 24 [Source:HGNC Symbol;Acc:11403]                                                  | chr13 | 99102455  | 99230194  |
| STX17       | syntaxin 17 [Source:HGNC Symbol;Acc:11432]                                                                 | chr9  | 102668915 | 102732618 |
| SUSD1       | sushi domain containing 1 [Source:HGNC Symbol;Acc:25413]                                                   | chr9  | 114803065 | 114937688 |
| SYDE2       | synapse defective 1, Rho GTPase, homolog 2 (C. elegans) [Source:HGNC Symbol;Acc:25841]                     | chr1  | 85622556  | 85666729  |
| SYK         | spleen tyrosine kinase [Source:HGNC Symbol;Acc:11491]                                                      | chr9  | 93559069  | 93660031  |
| SYN3        | synapsin III [Source:HGNC Symbol;Acc:11496]                                                                | chr22 | 32908539  | 33459858  |
| SYNCRIP     | synaptotagmin binding, cytoplasmic RNA interacting protein [Source:HGNC Symbol;Acc:16918]                  | chr6  | 86267696  | 86353510  |
| SYNJ2       | synaptotagmin 2 [Source:HGNC Symbol;Acc:11504]                                                             | chr6  | 158397888 | 158520208 |
| SYNJ2BP     | synaptotagmin 2 binding protein [Source:HGNC Symbol;Acc:18955]                                             | chr14 | 70838148  | 70883778  |
| SYNRG       | synergilin, gamma [Source:HGNC Symbol;Acc:557]                                                             | chr17 | 35874900  | 35969544  |
| TBC1D2      | TBC1 domain family, member 2 [Source:HGNC Symbol;Acc:18026]                                                | chr9  | 100961311 | 101017915 |
| TBL1X       | transducin (beta)-like 1X-linked [Source:HGNC Symbol;Acc:11585]                                            | chrX  | 9431335   | 9687780   |
| TCEB1       | transcription elongation factor B (SIII), polypeptide 1 (15kDa, elongin C) [Source:HGNC Symbol;Acc:1161]   | chr8  | 74851404  | 74884522  |
| TCF7L2      | transcription factor 7-like 2 (T-cell specific, HMG-box) [Source:HGNC Symbol;Acc:11641]                    | chr10 | 114710009 | 114927437 |
| TCP1        | t-complex 1 [Source:HGNC Symbol;Acc:11655]                                                                 | chr6  | 160199530 | 160210781 |
| TEAD1       | TEA domain family member 1 (SV40 transcriptional enhancer factor) [Source:HGNC Symbol;Acc:11714]           | chr11 | 12690969  | 12696298  |
| TEC         | tec protein tyrosine kinase [Source:HGNC Symbol;Acc:11719]                                                 | chr4  | 48137800  | 48271881  |
| TES         | testis derived transcript (3 LIM domains) [Source:HGNC Symbol;Acc:14620]                                   | chr7  | 115850547 | 115898837 |
| TFPI        | tissue factor pathway inhibitor (lipoprotein-associated coagulation inhibitor) [Source:HGNC Symbol;Acc:11] | chr2  | 188328957 | 188430487 |
| THUMPD3     | THUMP domain containing 3 [Source:HGNC Symbol;Acc:24493]                                                   | chr3  | 9404526   | 9428475   |
| TIAM2       | T-cell lymphoma invasion and metastasis 2 [Source:HGNC Symbol;Acc:11806]                                   | chr6  | 155148831 | 155578857 |
| TLK1        | tousled-like kinase 1 [Source:HGNC Symbol;Acc:11841]                                                       | chr2  | 171847333 | 172087824 |
| TMA16       | translation machinery associated 16 homolog (S. cerevisiae) [Source:HGNC Symbol;Acc:25638]                 | chr4  | 164415594 | 164441691 |
| TMCO1       | transmembrane and coiled-coil domains 1 [Source:HGNC Symbol;Acc:18188]                                     | chr1  | 165696032 | 165796992 |
| TMCO3       | transmembrane and coiled-coil domains 3 [Source:HGNC Symbol;Acc:20329]                                     | chr13 | 114145310 | 114204542 |
| TMED3       | transmembrane emp24 protein transport domain containing 3 [Source:HGNC Symbol;Acc:28889]                   | chr15 | 79603404  | 79704334  |
| TMEM51      | transmembrane protein 51 [Source:HGNC Symbol;Acc:25488]                                                    | chr1  | 15479028  | 15546976  |
| TMEM67      | transmembrane protein 67 [Source:HGNC Symbol;Acc:28396]                                                    | chr8  | 94762072  | 94831462  |
| TMLHE       | trimethyllysine hydroxylase, epsilon [Source:HGNC Symbol;Acc:18308]                                        | chrX  | 154719776 | 154899605 |
| TMOD3       | tropomodulin 3 (ubiquitous) [Source:HGNC Symbol;Acc:11873]                                                 | chr15 | 52121825  | 52239492  |
| TMTC3       | transmembrane and tetratricopeptide repeat containing 3 [Source:HGNC Symbol;Acc:26899]                     | chr12 | 88536073  | 88593664  |
| TMX2-CTNND1 | TMX2-CTNND1 readthrough (non-protein coding) [Source:HGNC Symbol;Acc:41992]                                | chr11 | 57480077  | 57559058  |
| TNIK        | TRAF2 and NCK interacting kinase [Source:HGNC Symbol;Acc:30765]                                            | chr3  | 170779128 | 171183197 |
| TNPO3       | transportin 3 [Source:HGNC Symbol;Acc:17103]                                                               | chr7  | 128594948 | 128695198 |
| TNRC18      | trinucleotide repeat containing 18 [Source:HGNC Symbol;Acc:11962]                                          | chr7  | 5346421   | 5465045   |
| TNRC6A      | trinucleotide repeat containing 6A [Source:HGNC Symbol;Acc:11969]                                          | chr16 | 24736016  | 24838953  |
| TOPBP1      | topoisomerase (DNA) II binding protein 1 [Source:HGNC Symbol;Acc:17008]                                    | chr3  | 133317019 | 133385737 |
| TRAK1       | trafficking protein, kinesin binding 1 [Source:HGNC Symbol;Acc:29947]                                      | chr3  | 42055294  | 42267381  |
| TRAM1       | translocation associated membrane protein 1 [Source:HGNC Symbol;Acc:20568]                                 | chr8  | 71485677  | 71525622  |
| TRIM2       | tripartite motif containing 2 [Source:HGNC Symbol;Acc:15974]                                               | chr4  | 154068494 | 154260472 |
| TLL1-IT1    | TLL1 intronic transcript 1 (non-protein coding) [Source:HGNC Symbol;Acc:24214]                             | chr9  | 124646915 | 124725998 |
| TLL5        | tubulin tyrosine ligase-like family, member 5 [Source:HGNC Symbol;Acc:19963]                               | chr14 | 76094968  | 76421421  |
| TIW1        | twist basic helix-loop-helix transcription factor 1 [Source:HGNC Symbol;Acc:12428]                         | chr7  | 19060614  | 19157295  |
| TXNRD1      | thioredoxin reductase 1 [Source:HGNC Symbol;Acc:12437]                                                     | chr12 | 104609557 | 104744061 |
| UBE2U       | ubiquitin-conjugating enzyme E2U (putative) [Source:HGNC Symbol;Acc:28559]                                 | chr1  | 64664310  | 64733053  |
| UBE2V2      | ubiquitin-conjugating enzyme E2 variant 2 [Source:HGNC Symbol;Acc:12495]                                   | chr8  | 48920960  | 48977268  |
| UBR5        | ubiquitin protein ligase E3 component n-recognin 5 [Source:HGNC Symbol;Acc:16806]                          | chr8  | 103265240 | 103425069 |
| UCA1        | urothelial cancer associated 1 (non-protein coding) [Source:HGNC Symbol;Acc:37126]                         | chr19 | 15939757  | 15947130  |
| UGGT2       | UDP-glucose glycoprotein glucosyltransferase 2 [Source:HGNC Symbol;Acc:15664]                              | chr13 | 96453834  | 96710736  |
| UNC50       | unc-50 homolog (C. elegans) [Source:HGNC Symbol;Acc:16046]                                                 | chr2  | 99225042  | 99234978  |
| UQCC        | ubiquinol-cytochrome c reductase complex chaperone [Source:HGNC Symbol;Acc:15891]                          | chr20 | 33890369  | 33999944  |
| USP34       | ubiquitin specific peptidase 34 [Source:HGNC Symbol;Acc:20066]                                             | chr2  | 61414598  | 61702904  |

**table S3. Genes with significant transposon integrations in both RKO *BRAF*<sup>wt/-</sup> and DLD-1 *KRAS*<sup>wt/-</sup> libraries**

| Gene ID  | description                                                                            | Chrom | Start     | End       |
|----------|----------------------------------------------------------------------------------------|-------|-----------|-----------|
| VKORC1L1 | vitamin K epoxide reductase complex, subunit 1-like 1 [Source:HGNC Symbol;Acc:21492]   | chr7  | 65333254  | 65424550  |
| VMP1     | vacuole membrane protein 1 [Source:HGNC Symbol;Acc:29559]                              | chr17 | 57784553  | 57919616  |
| VPS45    | vacuolar protein sorting 45 homolog (S. cerevisiae) [Source:HGNC Symbol;Acc:14579]     | chr1  | 150039369 | 150117505 |
| WDR11    | WD repeat domain 11 [Source:HGNC Symbol;Acc:13831]                                     | chr10 | 122610687 | 122669036 |
| WDR82    | WD repeat domain 82 [Source:HGNC Symbol;Acc:28826]                                     | chr3  | 52288437  | 52327036  |
| WTAP     | Wilms tumor 1 associated protein [Source:HGNC Symbol;Acc:16846]                        | chr6  | 160146617 | 160177351 |
| XXYL1    | xyloside xylosyltransferase 1 [Source:HGNC Symbol;Acc:26639]                           | chr3  | 194789008 | 194996896 |
| YARS     | tyrosyl-tRNA synthetase [Source:HGNC Symbol;Acc:12840]                                 | chr1  | 33240840  | 33283754  |
| YBX1     | Y box binding protein 1 [Source:HGNC Symbol;Acc:8014]                                  | chr1  | 43148098  | 43168020  |
| YTHDF3   | YTH domain family, member 3 [Source:HGNC Symbol;Acc:26465]                             | chr8  | 64081112  | 64125346  |
| ZBTB38   | zinc finger and BTB domain containing 38 [Source:HGNC Symbol;Acc:26636]                | chr3  | 141043055 | 141168634 |
| ZBTB43   | zinc finger and BTB domain containing 43 [Source:HGNC Symbol;Acc:17908]                | chr9  | 129567285 | 129600489 |
| ZBTB80S  | zinc finger and BTB domain containing 8 opposite strand [Source:HGNC Symbol;Acc:24094] | chr1  | 33065773  | 33121504  |
| ZC3H6    | zinc finger CCCH-type containing 6 [Source:HGNC Symbol;Acc:24762]                      | chr2  | 113033171 | 113097640 |
| ZFAND1   | zinc finger, AN1-type domain 1 [Source:HGNC Symbol;Acc:25858]                          | chr8  | 82613569  | 82645138  |
| ZFHX3    | zinc finger homeobox 3 [Source:HGNC Symbol;Acc:777]                                    | chr16 | 72816784  | 73093597  |
| ZMYND8   | zinc finger, MYND-type containing 8 [Source:HGNC Symbol;Acc:9397]                      | chr20 | 45837859  | 45990567  |
| ZNF106   | zinc finger protein 106 [Source:HGNC Symbol;Acc:12886]                                 | chr15 | 42705021  | 42783321  |
| ZNF131   | zinc finger protein 131 [Source:HGNC Symbol;Acc:12915]                                 | chr5  | 43065278  | 43192123  |
| ZNF182   | zinc finger protein 182 [Source:HGNC Symbol;Acc:13001]                                 | chrX  | 47834250  | 47863377  |
| ZNF184   | zinc finger protein 184 [Source:HGNC Symbol;Acc:12975]                                 | chr6  | 27418522  | 27440897  |
| ZNF217   | zinc finger protein 217 [Source:HGNC Symbol;Acc:13009]                                 | chr20 | 52183604  | 52226446  |
| ZNF283   | zinc finger protein 283 [Source:HGNC Symbol;Acc:13077]                                 | chr19 | 44331444  | 44353307  |
| ZNF410   | zinc finger protein 410 [Source:HGNC Symbol;Acc:20144]                                 | chr14 | 74348320  | 74399214  |
| ZNF516   | zinc finger protein 516 [Source:HGNC Symbol;Acc:28990]                                 | chr18 | 74069644  | 74207146  |
| ZNF573   | zinc finger protein 573 [Source:HGNC Symbol;Acc:26420]                                 | chr19 | 38226734  | 38307940  |
| ZNF630   | zinc finger protein 630 [Source:HGNC Symbol;Acc:28855]                                 | chrX  | 47842756  | 47931025  |
| ZNF713   | zinc finger protein 713 [Source:HGNC Symbol;Acc:22043]                                 | chr7  | 55950169  | 56009918  |
| ZNF727   | zinc finger protein 727 [Source:HGNC Symbol;Acc:22785]                                 | chr7  | 63505821  | 63538927  |
| ZNF775   | zinc finger protein 775 [Source:HGNC Symbol;Acc:28501]                                 | chr7  | 150065879 | 150109558 |
| ZNF81    | zinc finger protein 81 [Source:HGNC Symbol;Acc:13156]                                  | chrX  | 47696301  | 47861960  |
| ZPLD1    | zona pellucida-like domain containing 1 [Source:HGNC Symbol;Acc:27022]                 | chr3  | 101818088 | 102198685 |
| ZSWIM5   | zinc finger, SWIM-type containing 5 [Source:HGNC Symbol;Acc:29299]                     | chr1  | 45482071  | 45776881  |

**table S3. Genes with significant transposon integrations in both RKO *BRAF*<sup>wt/-</sup> and DLD-1 *KRAS*<sup>wt/-</sup> libraries after selection in low glucose.** The transposon target genes in DLD-1 (Table S1) and RKO (Table S2) were intersected to obtain genes targeted in both genetic backgrounds.

**table S4. KEGG pathway analysis of 483 common transposon targeted genes with significant integrations in DLD-1 *KRAS*<sup>wild</sup> and RKO *BRAF*<sup>v600E</sup> libraries**

| KEGG ID  | Pathway name                                               | Genes in pathway | Genes found | P         | Genes                                                                      |
|----------|------------------------------------------------------------|------------------|-------------|-----------|----------------------------------------------------------------------------|
| hsa04310 | Wnt signaling pathway                                      | 151              | 12          | 5.232E-05 | CAMK2D CCND3 CSNK1E JUN MAP3K7 MAPK9 PPP3CA ROCK2 KIAH1 SMAD2 TBL1X TCF7L2 |
| hsa04660 | T cell receptor signaling pathway                          | 108              | 11          | 8.424E-06 | CD8B DLG1 JUN MALT1 MAP3K7 MAPK9 NCK1 PAK2 PIK3CB PPP3CA TEC               |
| hsa04710 | Circadian rhythm - mammal                                  | 23               | 4           | 1.826E-04 | ARNTL CSNK1E NPAS2 PER2                                                    |
| hsa04380 | Osteoclast differentiation                                 | 128              | 9           | 8.743E-04 | FHL2 JAK1 JUN MAP3K7 MAPK9 PIK3CB PPP3CA SYK TEC                           |
| hsa03040 | Spliceosome                                                | 128              | 9           | 8.743E-04 | ACIN1 DDX39B DHX16 HNRNPA3 RBM17 SF3A3 SF3B3 SNRNP200 SRSF3                |
| hsa05211 | Renal cell carcinoma                                       | 70               | 6           | 1.343E-03 | ARNT JUN MET PAK2 PIK3CB TCEB1                                             |
| hsa04520 | Adherens junction                                          | 73               | 6           | 1.714E-03 | ACTN4 MAP3K7 MET PTPN1 SMAD2 TCF7L2                                        |
| hsa00290 | Valine, leucine and isoleucine biosynthesis                | 11               | 2           | 1.991E-03 | IARS IARS2                                                                 |
| hsa03013 | RNA transport                                              | 152              | 9           | 3.095E-03 | ACIN1 DDX39B EEF1A1 EIF3A EIF4A1 EIF4A2 GEMIN6 NUP214 NUP35                |
| hsa04722 | Neurotrophin signaling pathway                             | 127              | 8           | 3.100E-03 | BDNF CAMK2D FOXO3 JUN MAP3K1 MAPK9 MAPKAPK2 PIK3CB                         |
| hsa05210 | Colorectal cancer                                          | 62               | 5           | 3.524E-03 | JUN MAPK9 PIK3CB SMAD2 TCF7L2                                              |
| hsa04012 | ErbB signaling pathway                                     | 87               | 6           | 4.598E-03 | CAMK2D JUN MAPK9 NCK1 PAK2 PIK3CB                                          |
| hsa05120 | Epithelial cell signaling in Helicobacter pylori infection | 68               | 5           | 5.653E-03 | ADAM10 ADAM17 JUN MAPK9 MET                                                |
| hsa05212 | Pancreatic cancer                                          | 70               | 5           | 6.388E-03 | BCL2L1 JAK1 MAPK9 PIK3CB SMAD2                                             |
| hsa04510 | Focal adhesion                                             | 200              | 10          | 7.175E-03 | ACTN4 CAV1 CCND3 COL4A2 JUN MAPK9 MET PAK2 PIK3CB ROCK2                    |
| hsa04144 | Endocytosis                                                | 203              | 10          | 7.967E-03 | ACAP2 ASAP3 CAV1 MET NEDD4L RAB11FIP2 RAB5A SMAD2 SMAP2 VPS45              |
| hsa04971 | Gastric acid secretion                                     | 74               | 5           | 8.322E-03 | ADCY7 ADCY9 CAMK2D GNAI3 SLC9A4                                            |
| hsa04662 | B cell receptor signaling pathway                          | 75               | 5           | 8.865E-03 | JUN MALT1 PIK3CB PPP3CA SYK                                                |
| hsa04912 | GnRH signaling pathway                                     | 101              | 6           | 1.015E-02 | ADCY7 ADCY9 CAMK2D JUN MAP3K1 MAPK9                                        |
| hsa04916 | Melanogenesis                                              | 101              | 6           | 1.015E-02 | ADCY7 ADCY9 CAMK2D GNAI3 KITLG TCF7L2                                      |
| hsa04360 | Axon guidance                                              | 130              | 7           | 1.188E-02 | GNAI3 MET NCK1 PAK2 PPP3CA ROCK2 SEMA5A                                    |
| hsa00410 | beta-Alanine metabolism                                    | 22               | 2           | 1.522E-02 | ALDH2 GAD1                                                                 |
| hsa04914 | Progesterone-mediated oocyte maturation                    | 87               | 5           | 1.746E-02 | ADCY7 ADCY9 GNAI3 MAPK9 PIK3CB                                             |
| hsa04962 | Vasopressin-regulated water reabsorption                   | 44               | 3           | 2.081E-02 | ADCY9 DYNCL11 RAB5A                                                        |
| hsa04142 | Lysosome                                                   | 121              | 6           | 2.479E-02 | AGA AP1B1 AP1S3 AP3M1 LIPA SLC17A5                                         |
| hsa04666 | Fc gamma R-mediated phagocytosis                           | 95               | 5           | 2.561E-02 | ARPC2 ASAP3 GSN PIK3CB SYK                                                 |
| hsa05100 | Bacterial invasion of epithelial cells                     | 71               | 4           | 2.720E-02 | ARPC2 CAV1 MET PIK3CB                                                      |
| hsa04930 | Type II diabetes mellitus                                  | 48               | 3           | 2.766E-02 | MAPK9 PIK3CB PKM                                                           |
| hsa05213 | Endometrial cancer                                         | 52               | 3           | 3.569E-02 | FOXO3 PIK3CB TCF7L2                                                        |
| hsa05142 | Chagas disease (American trypanosomiasis)                  | 104              | 5           | 3.741E-02 | GNAI3 JUN MAPK9 PIK3CB SMAD2                                               |
| hsa00230 | Purine metabolism                                          | 162              | 7           | 3.750E-02 | ADCY7 ADCY9 AK7 NUDT5 PDE6D PKM PRIM2                                      |
| hsa05200 | Pathways in cancer                                         | 327              | 12          | 3.756E-02 | ARNT BCL2L1 COL4A2 JAK1 JUN KITLG MAPK9 MET PIK3CB SMAD2 TCEB1 TCF7L2      |
| hsa05145 | Toxoplasmosis                                              | 133              | 6           | 3.836E-02 | BCL2L1 GNAI3 JAK1 MAP3K7 MAPK9 PIK3CB                                      |
| hsa05014 | Amyotrophic lateral sclerosis (ALS)                        | 54               | 3           | 4.016E-02 | BCL2L1 PPP3CA RAB5A                                                        |
| hsa04141 | Protein processing in endoplasmic reticulum                | 168              | 7           | 4.471E-02 | ERLEC1 HSPA4L MAPK9 MARCH6 RAD23B TRAM1 UGGT2                              |
| hsa04120 | Ubiquitin mediated proteolysis                             | 139              | 6           | 4.666E-02 | MAP3K1 NEDD4L KIAH1 TCEB1 UBE2U UBR5                                       |
| hsa04010 | MAPK signaling pathway                                     | 268              | 10          | 4.683E-02 | BDNF CACNB4 JUN MAP3K1 MAP3K7 MAP4K3 MAPK9 MAPKAPK2 PAK2 PPP3CA            |
| hsa00562 | Inositol phosphate metabolism                              | 57               | 3           | 4.743E-02 | PI4K2B PIK3CB SYNJ2                                                        |

table S4. KEGG pathway analysis of 483 common transposon targeted genes with significant integrations in DLD-1 *KRAS*<sup>wild</sup> and RKO *BRAF*<sup>v600E</sup> libraries. A KEGG pathway analysis of the 483 common transposon targeted genes with significantly high count of transposon integrations (table S3).

**table S5a. Assignment of 163 common CIS genes in DLD-1 KRAS<sup>wt/-</sup> and RKO BRAF<sup>wt/-</sup> to colorectal cancer pathways**

| Gene symbol | Cancer gene          | Pathway  |                      |          |          |      |       |          |                             |                                  |                                                                                                                                                                                                                                                                                                                                                                                                                                                                                                                                                                                                                                                                                               | Mutual exclusivity with KRAS mutation in TCGA COAD |
|-------------|----------------------|----------|----------------------|----------|----------|------|-------|----------|-----------------------------|----------------------------------|-----------------------------------------------------------------------------------------------------------------------------------------------------------------------------------------------------------------------------------------------------------------------------------------------------------------------------------------------------------------------------------------------------------------------------------------------------------------------------------------------------------------------------------------------------------------------------------------------------------------------------------------------------------------------------------------------|----------------------------------------------------|
|             |                      | Wnt      | EGFR/Ras/MAPK        | PI3K     | TGFB     | TP53 | Hippo | Rap1     | Cellular glucose metabolism | Other                            | KEGG Pathway                                                                                                                                                                                                                                                                                                                                                                                                                                                                                                                                                                                                                                                                                  |                                                    |
| ACAP2       |                      |          |                      |          |          |      |       |          |                             |                                  | hsa04144 Endocytosis                                                                                                                                                                                                                                                                                                                                                                                                                                                                                                                                                                                                                                                                          |                                                    |
| ACER3       |                      |          |                      |          |          |      |       |          |                             |                                  | hsa00600 Sphingolipid metabolism                                                                                                                                                                                                                                                                                                                                                                                                                                                                                                                                                                                                                                                              |                                                    |
| ADK         |                      |          |                      |          |          |      |       |          |                             |                                  | hsa00230 Purine metabolism<br>hsa01100 Metabolic pathways                                                                                                                                                                                                                                                                                                                                                                                                                                                                                                                                                                                                                                     |                                                    |
| AGAP1       |                      |          |                      |          |          |      |       |          |                             | Vesicle sorting<br>22453919      | hsa04144 Endocytosis                                                                                                                                                                                                                                                                                                                                                                                                                                                                                                                                                                                                                                                                          |                                                    |
| AP1S3       |                      |          |                      |          |          |      |       |          |                             |                                  | hsa04142 Lysosome                                                                                                                                                                                                                                                                                                                                                                                                                                                                                                                                                                                                                                                                             |                                                    |
| APBB2       |                      |          |                      |          |          |      |       |          |                             |                                  |                                                                                                                                                                                                                                                                                                                                                                                                                                                                                                                                                                                                                                                                                               | 0.35                                               |
| ARHGAP42    |                      |          |                      |          |          |      |       |          |                             |                                  |                                                                                                                                                                                                                                                                                                                                                                                                                                                                                                                                                                                                                                                                                               |                                                    |
| ATP8A2      |                      |          |                      |          |          |      |       |          |                             |                                  |                                                                                                                                                                                                                                                                                                                                                                                                                                                                                                                                                                                                                                                                                               |                                                    |
| BCAS3       | 12378525             |          |                      |          |          |      |       |          |                             |                                  |                                                                                                                                                                                                                                                                                                                                                                                                                                                                                                                                                                                                                                                                                               |                                                    |
| C14orf182   |                      |          |                      |          |          |      |       |          |                             |                                  |                                                                                                                                                                                                                                                                                                                                                                                                                                                                                                                                                                                                                                                                                               |                                                    |
| C4orf45     |                      |          |                      |          |          |      |       |          |                             |                                  |                                                                                                                                                                                                                                                                                                                                                                                                                                                                                                                                                                                                                                                                                               | 0.13                                               |
| C9orf3      |                      |          |                      |          |          |      |       |          |                             |                                  |                                                                                                                                                                                                                                                                                                                                                                                                                                                                                                                                                                                                                                                                                               |                                                    |
| CAMK2D      |                      | KEGG     | KEGG                 |          |          |      |       |          |                             |                                  | hsa04012 ErbB signaling pathway<br>hsa04020 Calcium signaling pathway<br>hsa04066 HIF-1 signaling pathway<br>hsa04114 Oocyte meiosis<br>hsa04261 Adrenergic signaling in cardiomyocytes<br>hsa04310 Wnt signaling pathway<br>hsa04713 Circadian entrainment<br>hsa04720 Long-term potentiation<br>hsa04722 Neurotrophin signaling pathway<br>hsa04725 Cholinergic synapse<br>hsa04728 Dopaminergic synapse<br>hsa04740 Olfactory transduction<br>hsa04911 Insulin secretion<br>hsa04912 GnRH signaling pathway<br>hsa04916 Melanogenesis<br>hsa04971 Gastric acid secretion<br>hsa05031 Amphetamine addiction<br>hsa05152 Tuberculosis<br>hsa05205 Proteoglycans in cancer<br>hsa05214 Glioma |                                                    |
| CCSER1      | 23665203             |          |                      |          |          |      |       |          |                             |                                  |                                                                                                                                                                                                                                                                                                                                                                                                                                                                                                                                                                                                                                                                                               |                                                    |
| CDK14       | 22922871             | 20627573 |                      |          |          |      |       |          |                             |                                  | hsa05202 Transcriptional misregulation in ca                                                                                                                                                                                                                                                                                                                                                                                                                                                                                                                                                                                                                                                  | 0.277                                              |
| CDKAL1      |                      |          |                      |          |          |      |       |          | 23840313                    |                                  |                                                                                                                                                                                                                                                                                                                                                                                                                                                                                                                                                                                                                                                                                               |                                                    |
| CHST11      |                      |          | 22317973             |          | 19937589 |      |       |          |                             |                                  | hsa00532 Glycosaminoglycan biosynthesis                                                                                                                                                                                                                                                                                                                                                                                                                                                                                                                                                                                                                                                       | 0.22                                               |
| CLSTN2      |                      |          |                      |          |          |      |       |          |                             |                                  |                                                                                                                                                                                                                                                                                                                                                                                                                                                                                                                                                                                                                                                                                               | 0.09                                               |
| CNBD1       |                      |          |                      |          |          |      |       |          |                             |                                  |                                                                                                                                                                                                                                                                                                                                                                                                                                                                                                                                                                                                                                                                                               |                                                    |
| CNTNAP2     |                      |          |                      |          |          |      |       |          |                             |                                  | hsa04514 Cell adhesion molecules (CAMs)                                                                                                                                                                                                                                                                                                                                                                                                                                                                                                                                                                                                                                                       |                                                    |
| COG5        |                      |          |                      |          |          |      |       |          |                             |                                  |                                                                                                                                                                                                                                                                                                                                                                                                                                                                                                                                                                                                                                                                                               |                                                    |
| CPNE4       |                      |          |                      |          |          |      |       |          |                             |                                  |                                                                                                                                                                                                                                                                                                                                                                                                                                                                                                                                                                                                                                                                                               | 0.22                                               |
| CSMD1       | 22367537<br>18614856 |          |                      |          |          |      |       |          |                             |                                  |                                                                                                                                                                                                                                                                                                                                                                                                                                                                                                                                                                                                                                                                                               |                                                    |
| CSMD3       | 24576404             |          |                      |          |          |      |       |          |                             |                                  |                                                                                                                                                                                                                                                                                                                                                                                                                                                                                                                                                                                                                                                                                               |                                                    |
| DAB1        |                      |          | 12877983             |          |          |      |       |          |                             |                                  |                                                                                                                                                                                                                                                                                                                                                                                                                                                                                                                                                                                                                                                                                               |                                                    |
| DGKB        |                      |          | 19540930             |          |          |      |       |          |                             | 20081858<br>20185807<br>17588539 | hsa00561 Glycerolipid metabolism<br>hsa00564 Glycerophospholipid metabolism<br>hsa01100 Metabolic pathways<br>hsa04070 Phosphatidylinositol signaling system                                                                                                                                                                                                                                                                                                                                                                                                                                                                                                                                  |                                                    |
| DIAPH3      |                      |          | 22593025             |          |          |      |       |          |                             |                                  | hsa04810 Regulation of actin cytoskeleton                                                                                                                                                                                                                                                                                                                                                                                                                                                                                                                                                                                                                                                     |                                                    |
| DIP2B       |                      |          |                      |          |          |      |       |          |                             |                                  |                                                                                                                                                                                                                                                                                                                                                                                                                                                                                                                                                                                                                                                                                               |                                                    |
| DIS3L2      | 22306653             |          | 15766527<br>24141620 |          |          |      |       |          | 21962509                    |                                  |                                                                                                                                                                                                                                                                                                                                                                                                                                                                                                                                                                                                                                                                                               |                                                    |
| DLG1        |                      |          | 16511562             | 16511562 |          |      | KEGG  |          |                             |                                  | hsa04390 Hippo signaling pathway<br>hsa04660 T cell receptor signaling pathway<br>hsa05166 HTLV-I infection<br>hsa05203 Viral carcinogenesis                                                                                                                                                                                                                                                                                                                                                                                                                                                                                                                                                  | 0.118                                              |
| DLG2        | 24703847             |          |                      |          |          |      | KEGG  |          |                             |                                  | hsa04390 Hippo signaling pathway                                                                                                                                                                                                                                                                                                                                                                                                                                                                                                                                                                                                                                                              |                                                    |
| DLGAP1      |                      |          |                      |          |          |      |       |          |                             |                                  | hsa04724<br>Glutamatergic synapse                                                                                                                                                                                                                                                                                                                                                                                                                                                                                                                                                                                                                                                             |                                                    |
| DLGAP1-AS2  |                      |          |                      |          |          |      |       |          |                             |                                  |                                                                                                                                                                                                                                                                                                                                                                                                                                                                                                                                                                                                                                                                                               |                                                    |
| DNAH7       |                      |          |                      |          |          |      |       |          |                             |                                  |                                                                                                                                                                                                                                                                                                                                                                                                                                                                                                                                                                                                                                                                                               | 0.045                                              |
| DOCK4       | 19383911<br>12628187 | 18641688 |                      |          |          |      |       | 19159611 |                             |                                  |                                                                                                                                                                                                                                                                                                                                                                                                                                                                                                                                                                                                                                                                                               |                                                    |







**table S5a. Assignment of 163 common CIS genes in DLD-1 KRAS<sup>wt/-</sup> and RKO BRAF<sup>wt/-</sup> to colorectal cancer pathways**

| Gene symbol | Cancer gene          | Pathway  |                                 |                      |          |      |          |      |                             |          |                                                                                                                                                                                                                                                                                                                                                                                                                         | Mutual exclusivity with KRAS mutation in TCGA COAD                                                                                                                                                                                                                                                                                                                     |  |
|-------------|----------------------|----------|---------------------------------|----------------------|----------|------|----------|------|-----------------------------|----------|-------------------------------------------------------------------------------------------------------------------------------------------------------------------------------------------------------------------------------------------------------------------------------------------------------------------------------------------------------------------------------------------------------------------------|------------------------------------------------------------------------------------------------------------------------------------------------------------------------------------------------------------------------------------------------------------------------------------------------------------------------------------------------------------------------|--|
|             |                      | Wnt      | EGFR/Ras/MAPK                   | PI3K                 | TGFB     | TP53 | Hippo    | Rap1 | Cellular glucose metabolism | Other    | KEGG Pathway                                                                                                                                                                                                                                                                                                                                                                                                            |                                                                                                                                                                                                                                                                                                                                                                        |  |
| PPHLN1      |                      |          |                                 |                      |          |      |          |      |                             |          |                                                                                                                                                                                                                                                                                                                                                                                                                         | hsa04010 MAPK signaling pathway<br>hsa04020 Calcium signaling pathway<br>hsa04114 Oocyte meiosis<br>hsa04210 Apoptosis<br>hsa04310 Wnt signaling pathway<br>hsa04360 Axon guidance<br>hsa04370 VEGF signaling pathway<br>hsa04380 Osteoclast differentiation<br>hsa04650 Natural killer cell mediated cytotoxicity                                                     |  |
| PPP3CA      |                      | KEGG     | KEGG                            |                      |          |      |          |      |                             |          |                                                                                                                                                                                                                                                                                                                                                                                                                         | hsa04660 T cell receptor signaling pathway<br>hsa04662 B cell receptor signaling pathway<br>hsa04720 Long-term potentiation<br>hsa04724 Glutamatergic synapse<br>hsa04728 Dopaminergic synapse<br>hsa05010 Alzheimer's disease<br>hsa05014 Amyotrophic lateral sclerosis (ALS)<br>hsa05031 Amphetamine addiction<br>hsa05152 Tuberculosis<br>hsa05166 HTLV-I infection |  |
| PREP        |                      |          |                                 | 24244481<br>24936056 |          |      |          |      |                             |          |                                                                                                                                                                                                                                                                                                                                                                                                                         |                                                                                                                                                                                                                                                                                                                                                                        |  |
| PTPRD       | 19478061             |          |                                 |                      |          |      |          |      |                             |          | STAT3<br>19478061                                                                                                                                                                                                                                                                                                                                                                                                       |                                                                                                                                                                                                                                                                                                                                                                        |  |
| PTPRG       | 15155950             |          | 20651337                        |                      |          |      |          |      |                             |          |                                                                                                                                                                                                                                                                                                                                                                                                                         |                                                                                                                                                                                                                                                                                                                                                                        |  |
| PVT1        | 22869583             |          |                                 |                      |          |      |          |      |                             |          |                                                                                                                                                                                                                                                                                                                                                                                                                         |                                                                                                                                                                                                                                                                                                                                                                        |  |
| RBFOX1      | 23918370             |          |                                 |                      |          |      |          |      |                             |          |                                                                                                                                                                                                                                                                                                                                                                                                                         |                                                                                                                                                                                                                                                                                                                                                                        |  |
| RGS6        |                      |          | 23995786                        |                      |          |      |          |      |                             |          |                                                                                                                                                                                                                                                                                                                                                                                                                         |                                                                                                                                                                                                                                                                                                                                                                        |  |
| RNF111      |                      |          | 20965945                        |                      | 23467611 |      |          |      |                             |          |                                                                                                                                                                                                                                                                                                                                                                                                                         |                                                                                                                                                                                                                                                                                                                                                                        |  |
| RNF217      | 25298122             |          |                                 |                      |          |      |          |      |                             |          |                                                                                                                                                                                                                                                                                                                                                                                                                         |                                                                                                                                                                                                                                                                                                                                                                        |  |
| ROBO1       | 24429703             |          |                                 |                      |          |      |          |      |                             |          | hsa04360 Axon guidance                                                                                                                                                                                                                                                                                                                                                                                                  |                                                                                                                                                                                                                                                                                                                                                                        |  |
| ROBO2       | 22561520             |          |                                 |                      |          |      |          |      |                             |          | hsa04360 Axon guidance                                                                                                                                                                                                                                                                                                                                                                                                  |                                                                                                                                                                                                                                                                                                                                                                        |  |
| ROCK2       | 22510280             | 18784435 |                                 |                      |          |      |          |      |                             | 22355071 | hsa04062 Chemokine signaling pathway<br>hsa04270 Vascular smooth muscle contraction<br>hsa04310 Wnt signaling pathway<br>hsa04360 Axon guidance<br>hsa04510 Focal adhesion<br>hsa04670 Leukocyte transendothelial migration<br>hsa04810 Regulation of actin cytoskeleton<br>hsa05130 Pathogenic Escherichia coli infection<br>hsa05131 Shigellosis<br>hsa05132 Salmonella infection<br>hsa05205 Proteoglycans in cancer | 0.07                                                                                                                                                                                                                                                                                                                                                                   |  |
| ROR1        |                      | 22343533 |                                 |                      |          |      |          |      |                             |          | hsa04710 Circadian rhythm<br>hsa05321 Inflammatory bowel disease                                                                                                                                                                                                                                                                                                                                                        |                                                                                                                                                                                                                                                                                                                                                                        |  |
| RSRC1       | 24214394             |          |                                 |                      |          |      |          |      |                             |          |                                                                                                                                                                                                                                                                                                                                                                                                                         |                                                                                                                                                                                                                                                                                                                                                                        |  |
| RUNX1       | 22722202<br>22237106 | 23180629 |                                 |                      | 23180629 |      | 23180629 |      |                             |          | hsa05200 Pathways in cancer<br>hsa05202 Transcriptional misregulation in cancer<br>hsa05220 Chronic myeloid leukemia<br>hsa05221 Acute myeloid leukemia                                                                                                                                                                                                                                                                 |                                                                                                                                                                                                                                                                                                                                                                        |  |
| RUNX2       |                      | 23180629 | 22710434                        |                      | 23180629 |      | 23180629 |      | 21913213                    |          | hsa05202 Transcriptional misregulation in cancer                                                                                                                                                                                                                                                                                                                                                                        | 0.05                                                                                                                                                                                                                                                                                                                                                                   |  |
| SBF2        |                      |          | 19912440                        | 19912440             |          |      |          |      |                             |          |                                                                                                                                                                                                                                                                                                                                                                                                                         |                                                                                                                                                                                                                                                                                                                                                                        |  |
| SCAF11      |                      |          |                                 |                      |          |      |          |      |                             |          |                                                                                                                                                                                                                                                                                                                                                                                                                         |                                                                                                                                                                                                                                                                                                                                                                        |  |
| SEMA5A      |                      |          |                                 |                      |          |      |          |      |                             |          | hsa04360 Axon guidance                                                                                                                                                                                                                                                                                                                                                                                                  | 0.02                                                                                                                                                                                                                                                                                                                                                                   |  |
| SETD5       |                      |          |                                 |                      |          |      |          |      |                             |          |                                                                                                                                                                                                                                                                                                                                                                                                                         | 0.14                                                                                                                                                                                                                                                                                                                                                                   |  |
| SIAH1       |                      | KEGG     | 17998205<br>18089810<br>7972125 |                      |          | KEGG |          |      | 21734459                    |          | hsa04115 p53 signaling pathway<br>hsa04120 Ubiquitin mediated proteolysis<br>hsa04310 Wnt signaling pathway                                                                                                                                                                                                                                                                                                             |                                                                                                                                                                                                                                                                                                                                                                        |  |
| SIPA1L1     |                      | 17336901 |                                 |                      |          |      |          |      | KEGG                        |          | hsa04015 Rap1 signaling pathway                                                                                                                                                                                                                                                                                                                                                                                         | 0.038                                                                                                                                                                                                                                                                                                                                                                  |  |

**table S5a. Assignment of 163 common CIS genes in DLD-1 KRAS<sup>wt/-</sup> and RKO BRAF<sup>wt/-</sup> to colorectal cancer pathways**

| Gene symbol | Cancer gene          | Pathway  |                        |      |      |          |       |      |                             |          |                              | Mutual exclusivity with KRAS mutation in TCGA COAD                                                                                                                                                                                                                                                                                                                                                                   |      |
|-------------|----------------------|----------|------------------------|------|------|----------|-------|------|-----------------------------|----------|------------------------------|----------------------------------------------------------------------------------------------------------------------------------------------------------------------------------------------------------------------------------------------------------------------------------------------------------------------------------------------------------------------------------------------------------------------|------|
|             |                      | Wnt      | EGFR/Ras/MAPK          | PI3K | TGFB | TP53     | Hippo | Rap1 | Cellular glucose metabolism | Other    | KEGG Pathway                 |                                                                                                                                                                                                                                                                                                                                                                                                                      |      |
| SLC1A3      |                      |          | (21207374<br>23535601) |      |      |          |       |      |                             |          | hsa04724                     | Glutamatergic synapse                                                                                                                                                                                                                                                                                                                                                                                                | 0.22 |
| SLC24A3     |                      |          |                        |      |      |          |       |      |                             |          |                              |                                                                                                                                                                                                                                                                                                                                                                                                                      |      |
| SNAP25-AS1  |                      |          |                        |      |      |          |       |      | 17947242                    |          |                              | hsa04130 SNARE interactions in vesicular transport<br>hsa04721 Synaptic vesicle cycle<br>hsa04911 Insulin secretion                                                                                                                                                                                                                                                                                                  |      |
| SND1        | 25266736             |          |                        |      |      |          |       |      |                             |          |                              | hsa05169 Epstein-Barr virus infection<br>hsa05203 Viral carcinogenesis                                                                                                                                                                                                                                                                                                                                               |      |
| SORCS3      |                      |          |                        |      |      |          |       |      |                             |          |                              |                                                                                                                                                                                                                                                                                                                                                                                                                      |      |
| SPECC1      |                      |          |                        |      |      |          |       |      |                             |          |                              |                                                                                                                                                                                                                                                                                                                                                                                                                      |      |
| STAG1       |                      |          | 14639658               |      |      |          |       |      |                             |          |                              | hsa04110 Cell cycle                                                                                                                                                                                                                                                                                                                                                                                                  |      |
| STPG2       |                      |          |                        |      |      |          |       |      |                             |          |                              |                                                                                                                                                                                                                                                                                                                                                                                                                      |      |
| STXBP5L     |                      |          |                        |      |      |          |       |      |                             |          |                              |                                                                                                                                                                                                                                                                                                                                                                                                                      | 0.27 |
| SUPT3H      |                      |          |                        |      |      |          |       |      |                             |          |                              | hsa05202 Transcriptional misregulation in cancer                                                                                                                                                                                                                                                                                                                                                                     |      |
| SYT1        |                      |          |                        |      |      | 19255425 |       |      |                             | 19255425 |                              |                                                                                                                                                                                                                                                                                                                                                                                                                      |      |
| TANC2       |                      |          |                        |      |      |          |       |      |                             |          |                              |                                                                                                                                                                                                                                                                                                                                                                                                                      |      |
| TCF7L2      | 21892161             | KEGG     |                        |      |      |          | KEGG  |      |                             | 25398947 |                              | hsa04310 Wnt signaling pathway<br>hsa04390 Hippo signaling pathway<br>hsa04520 Adherens junction<br>hsa04916 Melanogenesis<br>hsa05200 Pathways in cancer<br>hsa05210 Colorectal cancer<br>hsa05213 Endometrial cancer<br>hsa05215 Prostate cancer<br>hsa05216 Thyroid cancer<br>hsa05217 Basal cell carcinoma<br>hsa05221 Acute myeloid leukemia<br>hsa05412 Arrhythmogenic right ventricular cardiomyopathy (ARVC) |      |
| TEAD1       |                      |          |                        |      |      |          | KEGG  |      |                             |          |                              | hsa04390 Hippo signaling pathway                                                                                                                                                                                                                                                                                                                                                                                     |      |
| THADA       | 12955091             |          |                        |      |      |          |       |      |                             |          |                              |                                                                                                                                                                                                                                                                                                                                                                                                                      |      |
| THSD4       | 25209362             |          |                        |      |      |          |       |      |                             |          |                              |                                                                                                                                                                                                                                                                                                                                                                                                                      |      |
| TNIK        | 19816403<br>20530691 |          |                        |      |      |          |       |      |                             |          |                              |                                                                                                                                                                                                                                                                                                                                                                                                                      |      |
| TNRC6B      |                      |          |                        |      |      |          |       |      |                             |          |                              | miRNA<br>19898466                                                                                                                                                                                                                                                                                                                                                                                                    |      |
| TPRG1       |                      |          |                        |      |      |          |       |      |                             |          |                              |                                                                                                                                                                                                                                                                                                                                                                                                                      |      |
| TRAPPC9     |                      |          | 23474757               |      |      |          |       |      |                             |          |                              | NFKB<br>23474757                                                                                                                                                                                                                                                                                                                                                                                                     |      |
| TRHDE       |                      |          |                        |      |      |          |       |      |                             |          |                              |                                                                                                                                                                                                                                                                                                                                                                                                                      |      |
| TRPS1       | 23028188             |          | 21868360               |      |      |          |       |      |                             |          |                              | EMT<br>21673316                                                                                                                                                                                                                                                                                                                                                                                                      |      |
| TXNRD1      |                      |          |                        |      |      |          |       |      |                             | 23743293 |                              | hsa00240 Pyrimidine metabolism<br>hsa00450 Selenocompound metabolism                                                                                                                                                                                                                                                                                                                                                 |      |
| UBE2E2      |                      |          |                        |      |      |          |       |      |                             |          |                              | hsa04120 Ubiquitin mediated proteolysis<br>hsa04141 Protein processing in endoplasmic reticulum                                                                                                                                                                                                                                                                                                                      | 0.17 |
| UBR5        | 23407552             |          |                        |      |      |          |       |      |                             | 22096030 | DSB<br>22884692,<br>17074762 | hsa04120 Ubiquitin mediated proteolysis                                                                                                                                                                                                                                                                                                                                                                              |      |
| UCA1        |                      | 24495014 |                        |      |      | 24648515 |       |      |                             |          |                              |                                                                                                                                                                                                                                                                                                                                                                                                                      |      |
| UNC13C      | 24292195             |          |                        |      |      |          |       |      |                             |          |                              | hsa04721 Synaptic vesicle cycle                                                                                                                                                                                                                                                                                                                                                                                      |      |
| UTRN        | 24416132<br>17384672 |          |                        |      |      |          |       |      |                             |          |                              |                                                                                                                                                                                                                                                                                                                                                                                                                      |      |
| VMP1        | 23637631             |          | 22535956               |      |      |          |       |      |                             |          |                              | Autophagy<br>20550938,<br>23884233,<br>17940279                                                                                                                                                                                                                                                                                                                                                                      |      |
| VPS13B      |                      |          |                        |      |      |          |       |      |                             |          |                              | Vesicle sorting/transport<br>12730828,<br>22442115                                                                                                                                                                                                                                                                                                                                                                   |      |
| WDFY3       |                      |          |                        |      |      |          |       |      |                             |          |                              | Autophagy<br>15292400,<br>23445924                                                                                                                                                                                                                                                                                                                                                                                   |      |

**table S5a. Assignment of 163 common CIS genes in DLD-1 KRAS<sup>w<sup>t</sup>/-</sup> and RKO BRAF<sup>w<sup>t</sup>/-</sup> to colorectal cancer pathways**

| Gene symbol       | Cancer gene          | Pathway |               |      |      |          |       |      |                             |       |                   | Mutual exclusivity with KRAS mutation in TCGA COAD |  |
|-------------------|----------------------|---------|---------------|------|------|----------|-------|------|-----------------------------|-------|-------------------|----------------------------------------------------|--|
|                   |                      | Wnt     | EGFR/Ras/MAPK | PI3K | TGFB | TP53     | Hippo | Rap1 | Cellular glucose metabolism | Other | KEGG Pathway      |                                                    |  |
| WDPCP             |                      |         |               |      |      |          |       |      |                             |       |                   |                                                    |  |
| WWOX              | 11572989             |         |               |      |      |          |       |      |                             |       | Hh<br>24393846    |                                                    |  |
| ZCCHC7            |                      |         |               |      |      |          |       |      |                             |       | TRAMP<br>21878619 |                                                    |  |
| ZFHX3             | 20854080<br>15750593 |         |               |      |      | 20599712 |       |      |                             |       | RUNX3<br>20599712 |                                                    |  |
| ZPLD1             |                      |         |               |      |      |          |       |      |                             |       |                   |                                                    |  |
| Fraction of genes | 31%                  | 10%     | 19%           | 7%   | 6%   | 1%       | 6%    | 2%   | 11%                         | 14%   | 37%               |                                                    |  |

**table S5. Assignment of 163 common CIS genes in DLD-1 KRAS<sup>w<sup>t</sup>/-</sup> and RKO BRAF<sup>w<sup>t</sup>/-</sup> to colorectal cancer pathways.** Primary publications in PubMed along with the Kyoto Encyclopedia of Genes and Genomes (KEGG) were searched (i) to determine whether the CIS genes were cancer genes (defined as recurrently somatically mutated by point mutations, amplifications, deletions or translocations) in any human tumor type, (ii) for genetic or functional evidence for assignment to any of the canonical CRC pathways Wnt, EGFR/Ras/MAPK, PIK3CA, or TGFB, or to the Hippo and Rap1 pathways associated with EGFR/Ras/MAPK signalling, (iii) for evidence for a role in intracellular glucose metabolism. Numbers, PubMed PMIDs of publication(s) supporting the assignment. KEGG, assignment to pathway based solely on KEGG. Numbers within parentheses indicate a weaker link (glutamate pathway in case of Ras pathway assignments). Mutual exclusivity was analysed as described by Gao et al (26). Briefly, CNA, somatic mutations and mRNA expression data from MSS tumors in the ICGC COAD dataset were included and mutual exclusivity Fisher's Exact test as Odds Ratio < 0.1 with a P < 0.05.



**table S5b. Pathway assignments of 163 randomly sampled ENSEMBL genes**

| Gene symbol       | Cancer gene | Wnt      | EGFR/ErbB/<br>Ras/MAPK | PI3K     | TGFB | TP53 | Hippo | Rap1 | Cellular<br>glucose<br>metabolism<br>or<br>transport | Other<br>pathway | KEGG Pathway                                     |
|-------------------|-------------|----------|------------------------|----------|------|------|-------|------|------------------------------------------------------|------------------|--------------------------------------------------|
| RN7SL552P         |             |          |                        |          |      |      |       |      |                                                      |                  |                                                  |
| RN7SL686P         |             |          |                        |          |      |      |       |      |                                                      |                  |                                                  |
| RNA5SP208         |             |          |                        |          |      |      |       |      |                                                      |                  |                                                  |
| RNA5SP299         |             |          |                        |          |      |      |       |      |                                                      |                  |                                                  |
| RNU1-132P         |             |          |                        |          |      |      |       |      |                                                      |                  |                                                  |
| RNU1-98P          |             |          |                        |          |      |      |       |      |                                                      |                  |                                                  |
| RNU2-8P           |             |          |                        |          |      |      |       |      |                                                      |                  |                                                  |
| RNU4ATAC14P       |             |          |                        |          |      |      |       |      |                                                      |                  |                                                  |
| RNU6-494P         |             |          |                        |          |      |      |       |      |                                                      |                  |                                                  |
| RNU6-858P         |             |          |                        |          |      |      |       |      |                                                      |                  |                                                  |
| RNU6-898P         |             |          |                        |          |      |      |       |      |                                                      |                  |                                                  |
| RNU7-134P         |             |          |                        |          |      |      |       |      |                                                      |                  |                                                  |
| RPL12P33          |             |          |                        |          |      |      |       |      |                                                      |                  |                                                  |
| RPL39P29          |             |          |                        |          |      |      |       |      |                                                      |                  |                                                  |
| RPL7AP6           |             |          |                        |          |      |      |       |      |                                                      |                  |                                                  |
| RPL7L1            |             |          |                        |          |      |      |       |      |                                                      |                  |                                                  |
| RPS3AP30          |             |          |                        |          |      |      |       |      |                                                      |                  |                                                  |
| RPS4XP19          |             |          |                        |          |      |      |       |      |                                                      |                  |                                                  |
| S100A16           |             |          |                        |          |      |      |       |      |                                                      |                  |                                                  |
| S1PR3             |             |          | 21984966               | 21984966 |      |      |       |      |                                                      |                  | hsa04080 Neuroactive ligand-receptor interaction |
| SCRN2             |             |          |                        |          |      |      |       |      |                                                      |                  |                                                  |
| SEMA6A            |             |          |                        |          |      |      |       |      |                                                      |                  | hsa04360 Axon guidance                           |
| SEPHS1P5          |             |          |                        |          |      |      |       |      |                                                      |                  |                                                  |
| SNAP25            |             |          |                        |          |      |      |       |      |                                                      |                  |                                                  |
| SNORA3            |             |          |                        |          |      |      |       |      |                                                      |                  |                                                  |
| SNORA55           |             |          |                        |          |      |      |       |      |                                                      |                  |                                                  |
| SPSB4             |             |          |                        |          |      |      |       |      |                                                      |                  |                                                  |
| SS18              | 7539744     | 24166495 |                        |          |      |      |       |      |                                                      |                  | hsa05202 Transcriptional misregulation in cancer |
| SSR4              |             |          |                        |          |      |      |       |      |                                                      |                  | hsa04141 Protein processing in ER                |
| STAC              |             |          |                        |          |      |      |       |      |                                                      |                  | hsa00052 Galactose metabolism                    |
| SUGT1P3           |             |          |                        |          |      |      |       |      |                                                      |                  |                                                  |
| SULT1E1           |             |          |                        |          |      |      |       |      |                                                      |                  | hsa00140 Steroid hormone biosynthesis            |
| TAGLN             |             | 18782851 | 11773051               |          |      |      |       |      |                                                      |                  |                                                  |
| TBC1D10C          |             |          | 23248241               |          |      |      |       |      |                                                      |                  |                                                  |
| TBC1D4            |             |          | 17230191               |          |      |      |       |      |                                                      |                  |                                                  |
| TCAIM             |             |          |                        |          |      |      |       |      | 25043022                                             |                  | hsa04919 Thyroid hormone signaling pathway       |
| TCTEX1D2          |             |          |                        |          |      |      |       |      |                                                      |                  |                                                  |
| THSD7B            |             |          |                        |          |      |      |       |      |                                                      |                  |                                                  |
| THY1              |             |          |                        |          |      |      |       |      |                                                      |                  | hsa04670 Leukocyte transendothelial migration    |
| TMEM51-AS1        |             |          |                        |          |      |      |       |      |                                                      |                  |                                                  |
| TMTC2             |             |          |                        |          |      |      |       |      |                                                      |                  |                                                  |
| TRGV7             |             |          |                        |          |      |      |       |      |                                                      |                  |                                                  |
| UNC93B7           |             |          |                        |          |      |      |       |      |                                                      |                  |                                                  |
| UOCRHP1           |             |          |                        |          |      |      |       |      |                                                      |                  |                                                  |
| USP17L25          |             |          |                        |          |      |      |       |      |                                                      |                  |                                                  |
| VAC14-AS1         |             |          |                        |          |      |      |       |      |                                                      |                  |                                                  |
| WBSOR16           |             |          |                        |          |      |      |       |      |                                                      |                  |                                                  |
| WDR41             |             |          |                        |          |      |      |       |      |                                                      |                  |                                                  |
| WDR54             |             |          |                        |          |      |      |       |      |                                                      |                  |                                                  |
| VTRNA2-1          |             |          |                        |          |      |      |       |      |                                                      |                  |                                                  |
| ZC3H7A            |             |          |                        |          |      |      |       |      |                                                      |                  |                                                  |
| ZFFM1             |             |          |                        |          |      |      |       |      |                                                      |                  |                                                  |
| ZNF486            |             |          |                        |          |      |      |       |      |                                                      |                  |                                                  |
| ZNF526            |             |          |                        |          |      |      |       |      |                                                      |                  |                                                  |
| Fraction of genes | 4%          | 2%       | 4%                     | 2%       | 0%   | 1%   | 0%    | 0%   | 1%                                                   | 1%               | 21%                                              |







table S5c. Pathway assignments of 163 randomly sampled ENSEMBL genes.

| Gene symbol | Cancer gene           | Wnt | EGFR/ErbB/<br>Ras/MAPK | PI3K | TGFB     | TP53 | Hippo | Rap1 | Cellular<br>glucose<br>metabolis<br>m or<br>transport | Other<br>pathway                                           | KEGG Pathway                                                                                                                                                                                           |
|-------------|-----------------------|-----|------------------------|------|----------|------|-------|------|-------------------------------------------------------|------------------------------------------------------------|--------------------------------------------------------------------------------------------------------------------------------------------------------------------------------------------------------|
| OR4G1P      |                       |     |                        |      |          |      |       |      |                                                       |                                                            |                                                                                                                                                                                                        |
| PRKX-AS1    |                       |     |                        |      |          |      |       |      |                                                       |                                                            |                                                                                                                                                                                                        |
| PRR24       |                       |     |                        |      |          |      |       |      |                                                       |                                                            |                                                                                                                                                                                                        |
| PSMC1P10    |                       |     |                        |      |          |      |       |      |                                                       |                                                            |                                                                                                                                                                                                        |
| PSMD12      |                       |     |                        |      |          |      |       |      |                                                       | hsa03050 Proteasome, hsa05169 Epstein-Barr virus infection |                                                                                                                                                                                                        |
| PTGR1       |                       |     |                        |      |          |      |       |      |                                                       |                                                            |                                                                                                                                                                                                        |
| PTPRN       |                       |     |                        |      |          |      |       |      |                                                       |                                                            | hsa04940 Type I diabetes mellitus                                                                                                                                                                      |
| RAB30-AS1   |                       |     |                        |      |          |      |       |      |                                                       |                                                            |                                                                                                                                                                                                        |
| REREP1Y     |                       |     |                        |      |          |      |       |      |                                                       |                                                            |                                                                                                                                                                                                        |
| RFX2        |                       |     | 15024578               |      |          |      |       |      |                                                       |                                                            |                                                                                                                                                                                                        |
| RILPL1      |                       |     |                        |      |          |      |       |      |                                                       |                                                            |                                                                                                                                                                                                        |
| RMND5B      |                       |     |                        |      |          |      |       |      |                                                       |                                                            |                                                                                                                                                                                                        |
| RN7SKP85    |                       |     |                        |      |          |      |       |      |                                                       |                                                            |                                                                                                                                                                                                        |
| RN7SL133P   |                       |     |                        |      |          |      |       |      |                                                       |                                                            |                                                                                                                                                                                                        |
| RN7SL205P   |                       |     |                        |      |          |      |       |      |                                                       |                                                            |                                                                                                                                                                                                        |
| RN7SL369P   |                       |     |                        |      |          |      |       |      |                                                       |                                                            |                                                                                                                                                                                                        |
| RN7SL425P   |                       |     |                        |      |          |      |       |      |                                                       |                                                            |                                                                                                                                                                                                        |
| RN7SL446P   |                       |     |                        |      |          |      |       |      |                                                       |                                                            |                                                                                                                                                                                                        |
| RN7SL480P   |                       |     |                        |      |          |      |       |      |                                                       |                                                            |                                                                                                                                                                                                        |
| RN7SL496P   |                       |     |                        |      |          |      |       |      |                                                       |                                                            |                                                                                                                                                                                                        |
| RN7SL518P   |                       |     |                        |      |          |      |       |      |                                                       |                                                            |                                                                                                                                                                                                        |
| RN7SL537P   |                       |     |                        |      |          |      |       |      |                                                       |                                                            |                                                                                                                                                                                                        |
| RN7SL557P   |                       |     |                        |      |          |      |       |      |                                                       |                                                            |                                                                                                                                                                                                        |
| RNF11       |                       |     |                        |      | 20676133 |      |       |      |                                                       |                                                            |                                                                                                                                                                                                        |
| RNF121      |                       |     |                        |      |          |      |       |      |                                                       | NFkB: 25388546                                             |                                                                                                                                                                                                        |
| RNU2-55P    |                       |     |                        |      |          |      |       |      |                                                       |                                                            |                                                                                                                                                                                                        |
| RNU6-1002P  |                       |     |                        |      |          |      |       |      |                                                       |                                                            |                                                                                                                                                                                                        |
| RNU6-1108P  |                       |     |                        |      |          |      |       |      |                                                       |                                                            |                                                                                                                                                                                                        |
| RNU6-1281P  |                       |     |                        |      |          |      |       |      |                                                       |                                                            |                                                                                                                                                                                                        |
| RNU6-208P   |                       |     |                        |      |          |      |       |      |                                                       |                                                            |                                                                                                                                                                                                        |
| RNU6-420P   |                       |     |                        |      |          |      |       |      |                                                       |                                                            |                                                                                                                                                                                                        |
| RNU6-510P   |                       |     |                        |      |          |      |       |      |                                                       |                                                            |                                                                                                                                                                                                        |
| RNU6ATAC38P |                       |     |                        |      |          |      |       |      |                                                       |                                                            |                                                                                                                                                                                                        |
| RNU7-80P    |                       |     |                        |      |          |      |       |      |                                                       |                                                            |                                                                                                                                                                                                        |
| RPL7P45     |                       |     |                        |      |          |      |       |      |                                                       |                                                            |                                                                                                                                                                                                        |
| RPL9P7      |                       |     |                        |      |          |      |       |      |                                                       |                                                            |                                                                                                                                                                                                        |
| RPRML       |                       |     |                        |      |          |      |       |      |                                                       |                                                            |                                                                                                                                                                                                        |
| RPS24P17    |                       |     |                        |      |          |      |       |      |                                                       |                                                            |                                                                                                                                                                                                        |
| SART1       |                       |     |                        |      |          |      |       |      |                                                       | antiviral effector genes:<br>25481564                      | hsa03040 spliceosome                                                                                                                                                                                   |
| SEC61A2     |                       |     |                        |      |          |      |       |      |                                                       |                                                            |                                                                                                                                                                                                        |
| SLC17A6     |                       |     |                        |      |          |      |       |      |                                                       |                                                            | hsa04721 Synaptic vesicle cycle, hsa05033 Nicotine addiction, hsa04723 Retrograde endocannabinoid signaling, hsa04724 Glutamatergic synapse                                                            |
| SLC1A6      |                       |     |                        |      |          |      |       |      |                                                       |                                                            | hsa04724 Glutamatergic synapse                                                                                                                                                                         |
| SMC3        | 25006131,<br>23955599 |     |                        |      |          |      |       |      |                                                       |                                                            | hsa04114 oocyte meiosis, hsa04110 cell cycle, hsa03050 proteasome, hsa05169 Epstein-Barr virus infection                                                                                               |
| SMIM2       |                       |     |                        |      |          |      |       |      |                                                       |                                                            |                                                                                                                                                                                                        |
| SNHG14      |                       |     |                        |      |          |      |       |      |                                                       |                                                            |                                                                                                                                                                                                        |
| SNORD24     |                       |     |                        |      |          |      |       |      |                                                       |                                                            |                                                                                                                                                                                                        |
| SPANXC      |                       |     |                        |      |          |      |       |      |                                                       |                                                            |                                                                                                                                                                                                        |
| SPG7        |                       |     |                        |      |          |      |       |      |                                                       |                                                            |                                                                                                                                                                                                        |
| SRC         |                       |     |                        | KEGG |          |      |       | KEGG |                                                       |                                                            | hsa04510, hsa04520, hsa04917, hsa04012, hsa05120, hsa04662, hsa04144, hsa04915, hsa05205, hsa04540, hsa04919, hsa04015, hsa04062, hsa04370, hsa04530, hsa04611, hsa04727, hsa04750, hsa04810, hsa04912 |

**table S5c. Pathway assignments of 163 randomly sampled ENSEMBL genes.**

| Gene symbol       | Cancer gene | Wnt | EGFR/ErbB/Ras/MAPK | PI3K | TGFB | TP53 | Hippo | Rap1 | Cellular glucose metabolism or transport | Other pathway | KEGG Pathway                                                                                     |
|-------------------|-------------|-----|--------------------|------|------|------|-------|------|------------------------------------------|---------------|--------------------------------------------------------------------------------------------------|
| TAS1R2            |             |     |                    |      |      |      |       |      | 22552794                                 |               | hsa04742 Taste transduction, hsa04973 Carbohydrate digestion and absorption                      |
| TCEAL1            |             |     |                    |      |      |      |       |      |                                          |               |                                                                                                  |
| TCEB3C            |             |     |                    |      |      |      |       |      |                                          |               |                                                                                                  |
| TCERG1            |             |     |                    |      |      |      |       |      |                                          |               | hsa03040 Spliceosome                                                                             |
| TEX101            |             |     |                    |      |      |      |       |      |                                          |               |                                                                                                  |
| TIGD7             |             |     |                    |      |      |      |       |      |                                          |               |                                                                                                  |
| TLR1              |             |     |                    |      |      |      |       |      |                                          |               |                                                                                                  |
| TMCO1             |             |     |                    |      |      |      |       |      |                                          |               |                                                                                                  |
| TMEM132C          |             |     |                    |      |      |      |       |      |                                          |               |                                                                                                  |
| TMEM52            |             |     |                    |      |      |      |       |      |                                          |               |                                                                                                  |
| TOX4              |             |     |                    |      |      |      |       |      |                                          |               |                                                                                                  |
| TPM3P2            |             |     |                    |      |      |      |       |      |                                          |               |                                                                                                  |
| TPTE2P3           |             |     |                    |      |      |      |       |      |                                          |               |                                                                                                  |
| TRAJ48            |             |     |                    |      |      |      |       |      |                                          |               |                                                                                                  |
| TRBV6-1           |             |     |                    |      |      |      |       |      |                                          |               | hsa04620 Toll-like receptor signaling pathway ,<br>hsa05152 Tuberculosis, hsa05145 Toxoplasmosis |
| TRIM14            |             |     |                    |      |      |      |       |      |                                          |               |                                                                                                  |
| TRIM23            |             |     |                    |      |      |      |       |      |                                          |               |                                                                                                  |
| TSPY20P           |             |     |                    |      |      |      |       |      |                                          |               |                                                                                                  |
| TTC36             |             |     |                    |      |      |      |       |      |                                          |               |                                                                                                  |
| TTC39A            |             |     |                    |      |      |      |       |      |                                          |               |                                                                                                  |
| TTY9A             |             |     |                    |      |      |      |       |      |                                          |               |                                                                                                  |
| USE1              |             |     |                    |      |      |      |       |      |                                          |               | hsa04130                                                                                         |
| USP9YP15          |             |     |                    |      |      |      |       |      |                                          |               |                                                                                                  |
| USP9YP21          |             |     |                    |      |      |      |       |      |                                          |               |                                                                                                  |
| WBP1LP6           |             |     |                    |      |      |      |       |      |                                          |               |                                                                                                  |
| VN1R40P           |             |     |                    |      |      |      |       |      |                                          |               |                                                                                                  |
| YIPF2             |             |     |                    |      |      |      |       |      |                                          |               | hsa05206 micro RNAs in cancer                                                                    |
| ZFAND6P1          |             |     |                    |      |      |      |       |      |                                          |               |                                                                                                  |
| ZNF639            |             |     |                    |      |      |      |       |      |                                          |               |                                                                                                  |
| ZNF879            |             |     |                    |      |      |      |       |      |                                          |               |                                                                                                  |
| ZSCAN16           |             |     |                    |      |      |      |       |      |                                          |               |                                                                                                  |
| Fraction of genes | 8%          | 3%  | 3%                 | 1%   | 1%   | 1%   | 0%    | 1%   | 1%                                       | 7%            | 21%                                                                                              |

table S5d. Pathway assignments of 163 randomly sampled ENSEMBL genes.

| Gene symbol | PubMed papers | Cancer gene | Wnt      | EGFR/ErbB/ Ras/MAPK | PI3K     | TGFB     | TP53     | Hippo | Rap1 | Cellular glucose metabolism or transport | Other pathway                                                         | KEGG Pathway                                                                                                                                                                          |
|-------------|---------------|-------------|----------|---------------------|----------|----------|----------|-------|------|------------------------------------------|-----------------------------------------------------------------------|---------------------------------------------------------------------------------------------------------------------------------------------------------------------------------------|
| ABCC10      | 68            |             |          |                     |          |          |          |       |      |                                          |                                                                       | hsa02010: ABC transporters                                                                                                                                                            |
| ACR         | 945           |             |          |                     |          |          |          |       |      |                                          |                                                                       |                                                                                                                                                                                       |
| ADAMTS4     | 91            |             |          |                     |          | 17900349 |          |       |      |                                          | JNK: 23438438<br>NF-κB: 23602832                                      |                                                                                                                                                                                       |
| ADC         | 23            |             |          |                     |          |          |          |       |      |                                          |                                                                       |                                                                                                                                                                                       |
| AKR1C6P     | 0             |             |          |                     |          |          |          |       |      |                                          |                                                                       |                                                                                                                                                                                       |
| ALG3P1      | 0             |             |          |                     |          |          |          |       |      |                                          |                                                                       |                                                                                                                                                                                       |
| AMICA1      | 4             |             |          |                     |          |          |          |       |      |                                          |                                                                       |                                                                                                                                                                                       |
| ANKZF1      | 2             |             |          |                     |          |          |          |       |      |                                          |                                                                       |                                                                                                                                                                                       |
| ARMCX3      | 3             |             | 23844091 |                     |          |          |          |       |      |                                          |                                                                       |                                                                                                                                                                                       |
| ASIC3       | 271           |             |          |                     |          |          |          |       |      | 18466760                                 |                                                                       | hsa04750 Inflammatory mediator regulation of TRP channels                                                                                                                             |
| ATP2C2      | 25            |             |          |                     |          |          |          |       |      |                                          |                                                                       |                                                                                                                                                                                       |
| AWAT1       | 2             |             |          |                     |          |          |          |       |      |                                          |                                                                       |                                                                                                                                                                                       |
| B4GALT7     | 11            |             |          |                     |          |          |          |       |      |                                          |                                                                       |                                                                                                                                                                                       |
| BAZ2B       | 6             |             |          |                     |          |          |          |       |      |                                          |                                                                       |                                                                                                                                                                                       |
| C17orf66    | 0             |             |          |                     |          |          |          |       |      |                                          |                                                                       |                                                                                                                                                                                       |
| C1GALT1     | 53            |             |          |                     |          |          |          |       |      |                                          |                                                                       | hsa00512: Mucin type O-Glycan biosynthesis ,<br>hsa01100: Metabolic pathways                                                                                                          |
| C20orf195   | 0             |             |          |                     |          |          |          |       |      |                                          |                                                                       |                                                                                                                                                                                       |
| C21orf59    | 2             |             |          |                     |          |          |          |       |      |                                          |                                                                       |                                                                                                                                                                                       |
| CCDC163P    | 0             |             |          |                     |          |          |          |       |      |                                          |                                                                       |                                                                                                                                                                                       |
| CCDC180     | 0             |             |          |                     |          |          |          |       |      |                                          |                                                                       |                                                                                                                                                                                       |
| CCDC34      | 0             |             |          |                     |          |          |          |       |      |                                          |                                                                       |                                                                                                                                                                                       |
| CDC42P1     | 0             |             |          |                     |          |          |          |       |      |                                          |                                                                       |                                                                                                                                                                                       |
| CDV3        | 6             |             |          |                     |          |          |          |       |      |                                          |                                                                       |                                                                                                                                                                                       |
| CHRNA4      | 207           |             |          |                     |          |          |          |       |      |                                          |                                                                       | hsa05033: Nicotine addiction, hsa04080:<br>Neuroactive ligand-receptor interaction,<br>hsa04725: Cholinergic synapse<br>hsa00533: Glycosaminoglycan biosynthesis -<br>keratan sulfate |
| CHST2       | 13            |             |          |                     |          |          |          |       |      |                                          |                                                                       |                                                                                                                                                                                       |
| CLRN1-AS1   | 0             |             |          |                     |          |          |          |       |      |                                          |                                                                       |                                                                                                                                                                                       |
| CTGLF12P    | 0             |             |          |                     |          |          |          |       |      |                                          |                                                                       |                                                                                                                                                                                       |
| CYCSP10     | 0             |             |          |                     |          |          |          |       |      |                                          |                                                                       |                                                                                                                                                                                       |
| CYCSP39     | 0             |             |          |                     |          |          |          |       |      |                                          |                                                                       |                                                                                                                                                                                       |
| CYFIP2      | 38            |             |          |                     | 21252116 |          | 17245118 |       |      |                                          |                                                                       | hsa03013: RNA transport , hsa04810:<br>Regulation of actin cytoskeleton                                                                                                               |
| CYP46A4P    | 0             |             |          |                     |          |          |          |       |      |                                          |                                                                       |                                                                                                                                                                                       |
| CYP4A22-AS1 | 0             |             |          |                     |          |          |          |       |      |                                          |                                                                       |                                                                                                                                                                                       |
| DDRGK1      | 3             |             |          |                     |          |          |          |       |      |                                          |                                                                       |                                                                                                                                                                                       |
| DDX11L2     | 0             |             |          |                     |          |          |          |       |      |                                          |                                                                       |                                                                                                                                                                                       |
| DEFB108B    | 0             |             |          |                     |          |          |          |       |      |                                          |                                                                       |                                                                                                                                                                                       |
| DNAH12      | 4             |             |          |                     |          |          |          |       |      |                                          |                                                                       | hsa05016: Huntington's disease                                                                                                                                                        |
| DOCK11      | 13            |             |          |                     |          |          |          |       |      |                                          |                                                                       |                                                                                                                                                                                       |
| EGOT        | 55            |             |          |                     |          |          |          |       |      |                                          |                                                                       |                                                                                                                                                                                       |
| FAM135A     | 0             |             |          |                     |          |          |          |       |      |                                          |                                                                       |                                                                                                                                                                                       |
| FAM21C      | 0             |             |          |                     |          |          |          |       |      |                                          |                                                                       |                                                                                                                                                                                       |
| FAM222A-AS1 | 0             |             |          |                     |          |          |          |       |      |                                          |                                                                       |                                                                                                                                                                                       |
| FAM224B     | 0             |             |          |                     |          |          |          |       |      |                                          |                                                                       |                                                                                                                                                                                       |
| FBXL21      | 4             |             |          |                     |          |          |          |       |      |                                          |                                                                       |                                                                                                                                                                                       |
| FOXN3-AS2   | 0             |             |          |                     |          |          |          |       |      |                                          |                                                                       |                                                                                                                                                                                       |
| FRMPD4-AS1  | 0             |             |          |                     |          |          |          |       |      |                                          |                                                                       |                                                                                                                                                                                       |
| GAGE2E      | 0             |             |          |                     |          |          |          |       |      |                                          |                                                                       |                                                                                                                                                                                       |
| GANC        | 613           |             |          |                     |          |          |          |       |      |                                          |                                                                       | hsa01100: Metabolic pathways ,<br>hsa00500: Starch and sucrose metabolism ,<br>hsa00052: Galactose metabolism                                                                         |
| GHITM       | 7             |             |          |                     |          |          |          |       |      | 7018580                                  |                                                                       |                                                                                                                                                                                       |
| GNG5P1      | 0             |             |          |                     |          |          |          |       |      |                                          |                                                                       |                                                                                                                                                                                       |
| GRM4        | 22            |             |          |                     |          |          |          |       |      |                                          | glutamate/GABA:<br>20338729                                           | hsa04724: Glutamatergic synapse, hsa04080:<br>Neuroactive ligand-receptor interaction,<br>hsa04742 Taste transduction                                                                 |
| HMG2P17     | 0             |             |          |                     |          |          |          |       |      |                                          |                                                                       |                                                                                                                                                                                       |
| HMX1        | 35            |             | 9435283  |                     |          |          |          |       |      |                                          |                                                                       |                                                                                                                                                                                       |
| HSD11B1L    | 1             |             |          |                     |          |          |          |       |      |                                          |                                                                       |                                                                                                                                                                                       |
| IDH3G       | 6             |             |          |                     |          |          |          |       |      |                                          |                                                                       |                                                                                                                                                                                       |
| IFI30       | 61            |             |          |                     |          |          |          |       |      |                                          | 24265765                                                              | hsa04612: Antigen processing and<br>presentation                                                                                                                                      |
| IGHV3-74    | 5             |             |          |                     |          |          |          |       |      |                                          |                                                                       |                                                                                                                                                                                       |
| IGLV6-57    | 2             |             |          |                     |          |          |          |       |      |                                          |                                                                       |                                                                                                                                                                                       |
| IGLV1-20    | 0             |             |          |                     |          |          |          |       |      |                                          |                                                                       |                                                                                                                                                                                       |
| IL9         | 145           |             |          |                     |          |          |          |       |      |                                          | Notch: 22503540<br>JAK/STAT:<br>24550509<br>survivin/ABK:<br>21057000 | hsa04060: Cytokine-cytokine receptor<br>interaction, hsa04630: Jak-STAT signaling<br>pathway, hsa04640: Hematopoietic cell<br>lineage, hsa05310: Asthma - Homo sapiens                |
| INCENP      | 47            |             |          |                     |          | 24108699 |          |       |      |                                          |                                                                       |                                                                                                                                                                                       |



table S5d. Pathway assignments of 163 randomly sampled ENSEMBL genes.

| Gene symbol | PubMed papers | Cancer gene                  | Wnt                        | EGFR/ErbB/ Ras/MAPK | PI3K | TGFB     | TP53     | Hippo | Rap1 | Cellular glucose metabolism or transport | Other pathway           | KEGG Pathway                                                                                                 |
|-------------|---------------|------------------------------|----------------------------|---------------------|------|----------|----------|-------|------|------------------------------------------|-------------------------|--------------------------------------------------------------------------------------------------------------|
| RNU6-1157P  |               | 0                            |                            |                     |      |          |          |       |      |                                          |                         |                                                                                                              |
| RNU6-1171P  | 9             |                              |                            |                     |      |          |          |       |      |                                          |                         |                                                                                                              |
| RNU6-1175P  | 0             |                              |                            |                     |      |          |          |       |      |                                          |                         |                                                                                                              |
| RNU6-483P   | 0             |                              |                            |                     |      |          |          |       |      |                                          |                         |                                                                                                              |
| RNU6-490P   | 0             |                              |                            |                     |      |          |          |       |      |                                          |                         |                                                                                                              |
| RNU6-984P   | 0             |                              |                            |                     |      |          |          |       |      |                                          |                         |                                                                                                              |
| RNU7-96P    | 0             |                              |                            |                     |      |          |          |       |      |                                          |                         |                                                                                                              |
| RNY3P6      | 0             |                              |                            |                     |      |          |          |       |      |                                          |                         |                                                                                                              |
| RPL7P48     | 0             |                              |                            |                     |      |          |          |       |      |                                          |                         |                                                                                                              |
| RPL7P56     | 0             |                              |                            |                     |      |          |          |       |      |                                          |                         |                                                                                                              |
| SCAMP3      | 13            |                              |                            | 9658162             |      |          |          |       |      |                                          |                         |                                                                                                              |
| SCARNA1     | 0             |                              |                            |                     |      |          |          |       |      |                                          |                         |                                                                                                              |
| SERPINH1P1  | 1             |                              |                            |                     |      |          |          |       |      |                                          |                         |                                                                                                              |
| SLC25A1P4   | 0             |                              |                            |                     |      |          |          |       |      |                                          |                         |                                                                                                              |
| SNHG5       | 2             | 18406879                     |                            |                     |      |          |          |       |      |                                          |                         |                                                                                                              |
| SNORD125    | 0             |                              |                            |                     |      |          |          |       |      |                                          |                         |                                                                                                              |
| SOX17       | 418           |                              | 10549281                   |                     |      | 19479035 |          |       |      |                                          |                         | hsa04310: Wnt signaling pathway                                                                              |
| SPRNT       | 5             | 25261934                     |                            |                     |      |          |          |       |      |                                          |                         |                                                                                                              |
| SSR3        | 9             |                              |                            |                     |      |          |          |       |      |                                          |                         | hsa04141: Protein processing in endoplasmic reticulum                                                        |
| SSR4P1      | 0             |                              |                            |                     |      |          |          |       |      |                                          |                         |                                                                                                              |
| SSX1        | 211           | 7539744, 7495284, 9428816, 5 | 24166495                   |                     |      |          | 22550415 |       |      |                                          |                         | hsa05202: Transcriptional misregulation in cancer                                                            |
| STX19       | 5             |                              |                            |                     |      |          |          |       |      |                                          |                         | hsa04130: SNARE interactions in vesicular transport                                                          |
| SURF2       | 8             |                              |                            |                     |      |          |          |       |      |                                          |                         |                                                                                                              |
| SYT10       | 4             |                              |                            |                     |      |          |          |       |      |                                          |                         |                                                                                                              |
| TBXAS1      | 24            |                              |                            |                     |      |          |          |       |      |                                          | prostaglandin: 16250911 | hsa04611: Platelet activation, hsa00590: Arachidonic acid metabolism, hsa01100: Metabolic pathways           |
| THYN1       | 4             |                              |                            |                     |      |          |          |       |      |                                          |                         |                                                                                                              |
| TLX1        | 193           | 1681546, 1683261, 11520572,  |                            |                     |      |          |          |       |      |                                          |                         | hsa05202: Transcriptional misregulation in cancer                                                            |
| TMEM144     | 2             |                              |                            |                     |      |          |          |       |      |                                          |                         |                                                                                                              |
| TPMTP1      | 0             |                              |                            |                     |      |          |          |       |      |                                          |                         |                                                                                                              |
| TRAJ9       | 1             |                              |                            |                     |      |          |          |       |      |                                          |                         |                                                                                                              |
| UBE2M       | 9             |                              | 19888210                   |                     |      |          |          |       |      |                                          |                         | hsa04120 Ubiquitin mediated proteolysis                                                                      |
| UCP1        | 1236          |                              | 15684380 2030762, 20307629 |                     |      |          |          |       |      |                                          |                         |                                                                                                              |
| UGT1A6      | 474           |                              |                            |                     |      |          |          |       |      |                                          |                         | hsa00140, hsa00982, hsa00980, hsa05204, hsa00040, hsa00053, hsa00500, hsa00830, hsa00860, hsa00983, hsa01100 |
| UQCC        | 14            |                              |                            |                     |      |          |          |       |      |                                          |                         |                                                                                                              |
| USP17L28    | 0             |                              |                            |                     |      |          |          |       |      |                                          |                         |                                                                                                              |
| VCAN        | 391           | 24951259                     |                            | 16648628            |      | 23824740 |          |       |      |                                          |                         | hsa04514: Cell adhesion molecules (CAMs)                                                                     |
| WEE1        | 774           |                              |                            |                     |      | 12669309 |          |       |      | CDK : 23051732                           |                         | hsa04110: Cell cycle                                                                                         |
| XKR6        | 8             |                              |                            |                     |      |          |          |       |      |                                          |                         |                                                                                                              |
| XKRYP3      | 0             |                              |                            |                     |      |          |          |       |      |                                          |                         |                                                                                                              |
| XPNPEP3     | 5             |                              |                            |                     |      |          |          |       |      |                                          |                         |                                                                                                              |
| ZFYVE9P2    | 0             |                              |                            |                     |      |          |          |       |      |                                          |                         |                                                                                                              |
| ZNF112      | 0             |                              |                            |                     |      |          |          |       |      |                                          |                         |                                                                                                              |
| ZNF552      | 1             |                              |                            |                     |      |          |          |       |      |                                          |                         |                                                                                                              |
| ZNF844      | 0             |                              |                            |                     |      |          |          |       |      |                                          |                         |                                                                                                              |
| ZNF92P3     | 0             |                              |                            |                     |      |          |          |       |      |                                          |                         |                                                                                                              |

Fraction of genes 6% 6% 5% 2% 5% 1% 1% 0% 4% 7% 20%

**table S6. Barcoded primers for amplification of transposon integration sites**

| Barcoded oligos  | Sequence 5' to 3'                    |
|------------------|--------------------------------------|
| sp3-1-aacgca     | aacgcaTTAACGTACGTCACAATATGATTATCTTTC |
| sp3-2-aagggt     | aagggtTTAACGTACGTCACAATATGATTATCTTTC |
| sp3-3-acactg     | acactgTTAACGTACGTCACAATATGATTATCTTTC |
| sp3-4-agcata     | agcataTTAACGTACGTCACAATATGATTATCTTTC |
| sp3-5-attacc     | attaccTTAACGTACGTCACAATATGATTATCTTTC |
| sp3-6-atttgg     | atttggTTAACGTACGTCACAATATGATTATCTTTC |
| sp3-7-ccgttt     | ccgtttTTAACGTACGTCACAATATGATTATCTTTC |
| sp3-8-gattga     | gattgaTTAACGTACGTCACAATATGATTATCTTTC |
| Splink2-1-aacgca | aacgcaGTGGCTGAATGAGACTGGTGTGCGAC     |
| Splink2-2-aagggt | aagggtGTGGCTGAATGAGACTGGTGTGCGAC     |
| Splink2-3-acactg | acactgGTGGCTGAATGAGACTGGTGTGCGAC     |
| Splink2-4-agcata | agcataGTGGCTGAATGAGACTGGTGTGCGAC     |
| Splink2-5-attacc | attaccGTGGCTGAATGAGACTGGTGTGCGAC     |
| Splink2-6-atttgg | atttggGTGGCTGAATGAGACTGGTGTGCGAC     |
| Splink2-7-ccgttt | ccgtttGTGGCTGAATGAGACTGGTGTGCGAC     |
| Splink2-8-gattga | gattgaGTGGCTGAATGAGACTGGTGTGCGAC     |

**table S6. Barcoded primers for amplification of transposon integration sites.** Barcodes in lowercase and primer sequences in capital letters.

**table S7. Target sequences and TaqMan probes for siRNA mediated gene knock-down**

| Gene               | ON-TARGETplus SMARTpool target sequences                                               | TaqMan Assay ID                                |
|--------------------|----------------------------------------------------------------------------------------|------------------------------------------------|
| CLSTN2             | GUGGUAACCUUUAUCAUGG, GGAAUUCUGUGCGUUCAAG, GAAUUGAACCGGCAUCACU and GCACUACUUAUGUCAUCAAU | Hs00223248_m1                                  |
| CSMD3              | AAUAAUAGCAGAAGAACA, GGAUUUAAAUUAGGGUCA, CGGAUAAAGAUUUAUAGCUU and CGAAGUGGAUCCUCAGAAA   | Hs00287451_m1                                  |
| FOXO3              | GCACAGAGUUGGAUGAAGU, GUACUCAACUAGUGCAAAAC, CGAAUCAGCUGACGACAGU and UAACUUUGAUUCCUCAUC  | Hs00818121_m1                                  |
| NAV3               | GCUGUAGCUCAGAUUUU, CAGGGAGCCUCUAAUUUUA, GAGAGGGUCUUCAGAUUGA and GGACUUAAACCUUUAUACUA   | Hs00372108_m1                                  |
| NCOA3              | GCAUUGAUGUCGUAAGAA, GAAUAAUGCACUUCUUAGA, GACAGGCACUUGAAUUGAA and AAAGCAAACUUCUCCGAAA   | Hs01105251_m1                                  |
| PTPRD              | UUAAGGAGAUUUCUAGGAA, GAUGAUUAGCCAAUAGGAA, UCAGAGAUUUGAGGUAAUA and GAAUGGAGCUCGAAUUUUA  | Hs00369913_m1                                  |
| ROBO1              | GGAUGAUUUUGCAACAAGA, GAGGGCAGCUAAUGCAUUA, GCAGGUACUUGGAGGAUUA and GAAUCAGACUGGUUAGUUU  | Hs00268049_m1                                  |
| ROCK2              | CAAACUUGGUAAAGAAUUG, GAAACUAAUAGGACACUAA, UAGAAUUGUGGCCUAGAA and GCAACUGGCUCGUUCAUUU   | Hs00178154_m1                                  |
| SEMA5A             | GGCAAGAUCCAGUAGCGUA, GAGCAACGAUUCGUAACA, UGGAGGAAUAGUCGGUAUA and CGGGUUGCAAGAACGAUA    | Hs01549381_m1                                  |
| SIPA1L1            | UGGAAUUGAUUCGUAAACA, GAUUUUGGACACGAGAAA, AGACAAGCCGUCGGAGAA and CCGUACAACUACCGAAUUA    | Hs00210194_m1                                  |
| SND1               | UCAUGGGUGAGGUGCGCAA, CGAGAGUUCUUCGAAAGA, UGAUGGAGAACAUGCGCAA and GGAAGUCUGUUUCACGAUA   | Hs00205182_m1                                  |
| TCF7L2             | GAUGUCGGCUCACUCCUA, ACACUUAACAGCCGACGUA, CGAGACAAUCCCGGAGAA and CAGCGAAUUGUUCCUAAAU    | Hs01009044_m1                                  |
| ZCCHC7             | GAAGAUGGACCCAGCGGUA, GGAUAAACAGUUGACCGA, UCACAUUACACACGUCAA and CCAGAUAGCUAAUACCGA     | Hs00540261_g1                                  |
| Non-targeting pool | UGGUUUACAUGUCACUAA, UGGUUUACAUGUUGUGUA, UGGUUUACAUGUUUCUGA and UGGUUUACAUGUUUCCUA      | N/A                                            |
| KRAS               | GGAGGGCUUUUUGUGUA, UCAAAGACAAGUGUGUA, GAAGUUUUGAAUUCUUUU and GAGAUAAACAGAUUCGUUA       | Hs00364284_g1                                  |
| BRAF               | CAUGAAGACCUCACAGUAA, UCAGUAAAGGUACGGAGUAA, AGACGGACUCGAGUGAUG and UUACCUUGGCUCACUACUA  | Hs00269944_m1                                  |
| ACTB               |                                                                                        | N/A                                            |
| SLC2A1 (GLUT1)     |                                                                                        | N/A                                            |
|                    |                                                                                        | Hs01060665_g1 (VIC.PL),<br>Hs01060665_g1 (FAM) |
|                    |                                                                                        | Hs00892681_m1                                  |

**table S7. Target sequences and TaqMan probes for siRNA mediated gene knock-down.** SMARTpools of three siRNAs for each gene and TaqMan assays used for analysing gene expression levels.

**table S8.** GIPZ lentivirus clones for shRNA mediated gene knock-down

| <b>Gene</b> | <b>GIPZ shRNA lentiviral particle sets</b>                                                               |
|-------------|----------------------------------------------------------------------------------------------------------|
| BRAF        | VGH5518-200207314 - V2LHS_240239<br>VGH5518-200238511 - V3LHS_355031<br>VGH5518-200234344 - V3LHS_355032 |
| FOXO3       | VGH5518-200278770 - V3LHS_375381<br>VGH5518-200223947 - V3LHS_641760<br>VGH5518-200228089 - V3LHS_641765 |
| KRAS        | VGH5518-200196451 - V2LHS_275818<br>VGH5518-200243083 - V3LHS_314004<br>VGH5518-200251719 - V3LHS_314006 |
| NCOA3       | VGH5518-200161516 - V2LHS_207128<br>VGH5518-200206608 - V2LHS_261936<br>VGH5518-200297500 - V3LHS_335962 |
| TCF7L2      | VGH5518-200206198 - V2LHS_116683<br>VGH5518-200257275 - V3LHS_312392<br>VGH5518-200257051 - V3LHS_312395 |

**table S8. GIPZ lentivirus clones for shRNA mediated gene knock-down.** GIPZ shRNA lentiviral particle sets for three validated genes (FOXO3, NCOA3 and TCF7L2) along with two known Ras pathway genes (KRAS and BRAF).







**Table S10: *In silico* analysis of GLUT1 (SLC2A1) promoter, 3Kb upstream of its initiation site, for finding direct binding sites of TCF7L2, FOXO3 and NCOA3.**

| <b>Gene</b> | <b>No. of sites</b> | <b>Median Score</b> |
|-------------|---------------------|---------------------|
| TCF7L2      | 16                  | 5,34                |
| FOXO3       | 13                  | 5,36                |
| NCOA3       | N/A                 | N/A                 |
| HIF1A       | 38                  | 5,27                |

**Table S10. *In silico* analyses was performed by JASPER (<http://jasper.genereg.net>) to find out if binding sites for FOXO3, NCOA3 and TCF7L2 exist in the GLUT1 promoter (3kb upstream sequence of the initiation site of the GLUT1 gene). These analyses revealed 16 and 13 putative binding sites for TCF7L2 and FOXO3, respectively, with a median score of 5.34 and 5.36, respectively. HIF1A, a positive regulator of GLUT1 (SLC2A1), has 38 binding sites with a median score of 5.27 similar to TCF7L2 and FOXO3 genes.**
